# Supplementary material for: Funding and services needed to achieve universal health coverage: applications of global, regional, and national estimates of utilisation of outpatient visits and inpatient admissions from 1990 to 2016, and unit costs from 1995 to 2016
Source: PubMed Central journal article supplement (PMC6323358; doi:10.1016/s2468-2667(18)30213-5), 2018-12-12
Supplement: mmc1.pdf [file mmc1.pdf]

# THE LANCET

## Public Health

### Supplementary appendix

This appendix formed part of the original submission and has been peer reviewed. We post it as supplied by the authors.

Supplement to: Moses M, Pedroza P, Baral R, et al. Funding and services needed to achieve universal health coverage: applications of global, regional, and national estimates of utilisation of outpatient visits and inpatient admissions from 1990 to 2016, and unit costs from 1995 to 2016. *Lancet Public Health* 2018; published online Dec 11. [http://dx.doi.org/10.1016/S2468-2667\(18\)30213-5](http://dx.doi.org/10.1016/S2468-2667(18)30213-5).

## Supplementary Appendix

**Funding and services needed to achieve universal health coverage: Applications of global, regional, and national estimates of utilisation of outpatient visits and inpatient admissions from 1990 to 2016, and unit costs from 1995 to 2016**

**Appendix to Funding and services needed to achieve universal health coverage:  
Applications of global, regional, and national estimates of utilisation of outpatient visits  
and inpatient admissions from 1990 to 2016, and unit costs from 1995 to 2016**

**Contents**

|                                                                                              |    |
|----------------------------------------------------------------------------------------------|----|
| <b>Section 1. Overview</b> .....                                                             | 4  |
| <b>1.1. Introduction</b> .....                                                               | 4  |
| <b>1.2. GATHER compliance</b> .....                                                          | 4  |
| <b>1.3. List of acronyms</b> .....                                                           | 8  |
| <b>Section 2. Utilisation data sources</b> .....                                             | 9  |
| <b>2.1. Systematic Review</b> .....                                                          | 9  |
| <b>2.2. Data Extraction</b> .....                                                            | 10 |
| <b>Section 3. Utilisation data grouping and adjustments</b> .....                            | 19 |
| <b>3.1. Inconsistencies across data sources</b> .....                                        | 19 |
| <b>3.2. Assignment of reference data sources</b> .....                                       | 20 |
| <b>3.3. Data grouping</b> .....                                                              | 20 |
| <b>3.4 Data adjustments</b> .....                                                            | 21 |
| <b>3.4.1 Inpatient data adjustments for data varying by age and sex</b> .....                | 22 |
| <b>3.4.2. Outpatient data adjustments for data varying by age and sex</b> .....              | 25 |
| <b>Section 4. Estimating the utilisation models</b> .....                                    | 28 |
| <b>4.1. Introduction</b> .....                                                               | 28 |
| <b>4.2. Quantifying and adjusting for differences across data sources in DisMod-MR</b> ..... | 28 |
| <b>4.3. Additional covariates and their definitions</b> .....                                | 28 |
| <b>4.4. Age-sex splitting</b> .....                                                          | 29 |
| <b>4.5. Raking DisMod-MR 2.1 estimates</b> .....                                             | 29 |
| <b>4.6. Understanding the impact of missing data on DisMod-MR 2.1 estimates</b> .....        | 30 |
| <b>4.7. Internal validity of results</b> .....                                               | 30 |
| <b>4.8. Age standardisation</b> .....                                                        | 30 |
| <b>Section 5. Utilisation results</b> .....                                                  | 33 |
| <b>5.1. Age and sex specific utilisation rates</b> .....                                     | 33 |
| <b>5.2. Country-specific utilisation rates from 1990-2016</b> .....                          | 33 |
| <b>Section 6. Unit cost estimates</b> .....                                                  | 51 |
| <b>6.1. Definition of unit cost</b> .....                                                    | 51 |

|                                                                                                                    |            |
|--------------------------------------------------------------------------------------------------------------------|------------|
| 6.2. Data sources.....                                                                                             | 51         |
| 6.3. Estimates of expenditures shares.....                                                                         | 52         |
| 6.4. Comparison to WHO-CHOICE estimates.....                                                                       | 53         |
| 6.5. Comparison to other comprehensive, national studies of the unit cost of services .....                        | 53         |
| 6.6. Country-specific parameters for the calculation of 2016 unit costs .....                                      | 54         |
| <b>Section 7. Cost of universal health coverage.....</b>                                                           | <b>61</b>  |
| 7.1. Introduction.....                                                                                             | 61         |
| 7.2. DALYs in the absence of health services .....                                                                 | 61         |
| 7.3. Identifying the UHC standard for utilisation .....                                                            | 71         |
| 7.4. Main analysis.....                                                                                            | 78         |
| 7.5 Sensitivity analysis – intermediate UHC standard for utilisation .....                                         | 85         |
| 7.6 Sensitivity analysis – improvements in quality and types of service .....                                      | 85         |
| <b>References.....</b>                                                                                             | <b>100</b> |
| <b>Table S5. Data sources used in the utilisation estimates and their attributes by country and years</b><br>..... | <b>102</b> |

## **Section 1. Overview**

### **1.1. Introduction**

This appendix provides methodological detail and supplemental figures and tables. Figure S1 presents the methods for the utilisation estimates, which can be summarised in three processes, moving from left to right: 1) data extraction, 2) data adjustments, and 3) estimating the utilisation models. Each of the processes is described in Sections 2-4 below. Section 5 reports additional results for the utilisation estimates. Section 6 reports the methods and detailed results for the unit cost estimates. Section 7 reports the methods for estimating the additional cost of universal health coverage (UHC) and supplemental results.

### **1.2. GATHER compliance**

The utilisation estimates incorporated a large number and wide variety of data sources on outpatient visits and inpatient admissions from 1990-2016. We documented the data sources and steps involved in our analytical procedures in compliance with the Guidelines for Accurate and Transparent Health Estimates Reporting (GATHER) recommendations (Table S1). The GATHER recommendations are at: <http://gather-statement.org/>

**Figure S1. Estimation flow chart including data inputs, data adjustments, database inputs, modeling processes, and results**

DisMod-MR 2.1= DisMod-Metaregression Version 2.1.

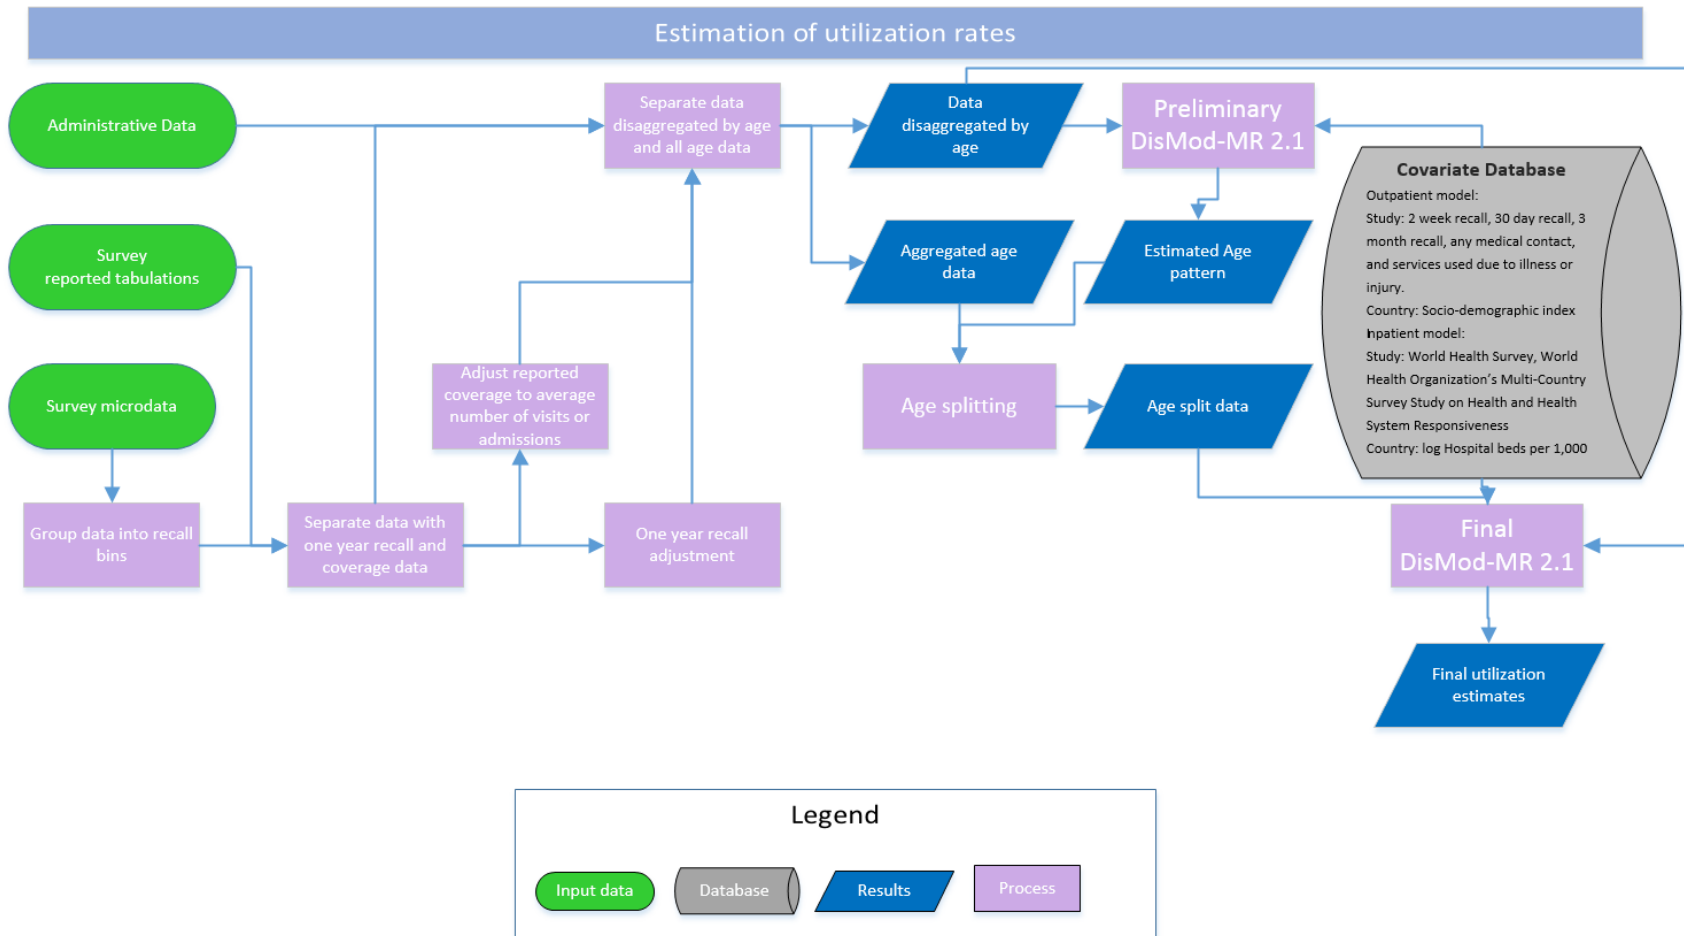

**Table S1. GATHER checklist with description of compliance and location of information**

| #                                                                                                     | GATHER checklist item                                                                                                                                                                                                                                                                                                                                                                  | Description of compliance                                                                                         | Reference                                                                                                                                                                                                                                                                                                                                                                                                                                                                                                                                                                                                                                                                                                                                                                                                                                                                                                         |
|-------------------------------------------------------------------------------------------------------|----------------------------------------------------------------------------------------------------------------------------------------------------------------------------------------------------------------------------------------------------------------------------------------------------------------------------------------------------------------------------------------|-------------------------------------------------------------------------------------------------------------------|-------------------------------------------------------------------------------------------------------------------------------------------------------------------------------------------------------------------------------------------------------------------------------------------------------------------------------------------------------------------------------------------------------------------------------------------------------------------------------------------------------------------------------------------------------------------------------------------------------------------------------------------------------------------------------------------------------------------------------------------------------------------------------------------------------------------------------------------------------------------------------------------------------------------|
| <b>Objectives and funding</b>                                                                         |                                                                                                                                                                                                                                                                                                                                                                                        |                                                                                                                   |                                                                                                                                                                                                                                                                                                                                                                                                                                                                                                                                                                                                                                                                                                                                                                                                                                                                                                                   |
| 1                                                                                                     | Define the indicators, populations, and time periods for which estimates were made.                                                                                                                                                                                                                                                                                                    | Narrative provided in main text and supplementary appendix.                                                       | Main text (Background, Methods) and supplementary appendix (Sections 2, 4, 5; Appendix tables S3A, S3B, S5)                                                                                                                                                                                                                                                                                                                                                                                                                                                                                                                                                                                                                                                                                                                                                                                                       |
| 2                                                                                                     | List the funding sources for the work.                                                                                                                                                                                                                                                                                                                                                 | Funding sources provided in main text.                                                                            | Main text (Funding)                                                                                                                                                                                                                                                                                                                                                                                                                                                                                                                                                                                                                                                                                                                                                                                                                                                                                               |
| <b>Data Inputs</b>                                                                                    |                                                                                                                                                                                                                                                                                                                                                                                        |                                                                                                                   |                                                                                                                                                                                                                                                                                                                                                                                                                                                                                                                                                                                                                                                                                                                                                                                                                                                                                                                   |
| <i>For all data inputs from multiple sources that are synthesised as part of the study:</i>           |                                                                                                                                                                                                                                                                                                                                                                                        |                                                                                                                   |                                                                                                                                                                                                                                                                                                                                                                                                                                                                                                                                                                                                                                                                                                                                                                                                                                                                                                                   |
| 3                                                                                                     | Describe how the data were identified and how the data were accessed.                                                                                                                                                                                                                                                                                                                  | Narrative description of data seeking methods provided in the main text and supplementary appendix.               | Main text (Methods) and supplementary appendix (Section 2)                                                                                                                                                                                                                                                                                                                                                                                                                                                                                                                                                                                                                                                                                                                                                                                                                                                        |
| 4                                                                                                     | Specify the inclusion and exclusion criteria. Identify all ad-hoc exclusions.                                                                                                                                                                                                                                                                                                          | Narrative about inclusion and exclusion criteria by data type provided in main text and supplementary appendix.   | Main text (Methods) and supplementary appendix (Sections 2, 5)                                                                                                                                                                                                                                                                                                                                                                                                                                                                                                                                                                                                                                                                                                                                                                                                                                                    |
| 5                                                                                                     | Provide information on all included data sources and their main characteristics. For each data source used, report reference information or contact name/institution, population represented, data collection method, year(s) of data collection, sex and age range, diagnostic criteria or measurement method, and sample size                                                        | Attributes reported in supplementary appendix. Data sources available online through Global Health Data Exchange. | Supplementary appendix (Appendix tables S3A, S3B, S5) and online data tools (Global Health Data Exchange, <a href="http://ghdx.healthdata.org/node/380336">http://ghdx.healthdata.org/node/380336</a> )                                                                                                                                                                                                                                                                                                                                                                                                                                                                                                                                                                                                                                                                                                           |
| 6                                                                                                     | Identify and describe any categories of input data that have potentially important biases (e.g., based on characteristics listed in item 5).                                                                                                                                                                                                                                           | Discussion of bias provided in main text and supplementary appendix.                                              | Main text (Methods) and supplementary appendix (Section 3)                                                                                                                                                                                                                                                                                                                                                                                                                                                                                                                                                                                                                                                                                                                                                                                                                                                        |
| <i>For data inputs that contribute to the analysis but were not synthesised as part of the study:</i> |                                                                                                                                                                                                                                                                                                                                                                                        |                                                                                                                   |                                                                                                                                                                                                                                                                                                                                                                                                                                                                                                                                                                                                                                                                                                                                                                                                                                                                                                                   |
| 7                                                                                                     | Describe and give sources for any other data inputs.                                                                                                                                                                                                                                                                                                                                   | Included in supplementary appendix and online through Global Health Data Exchange                                 | Supplementary appendix and Global Health Data Exchange, <a href="http://ghdx.healthdata.org/node/380336">http://ghdx.healthdata.org/node/380336</a>                                                                                                                                                                                                                                                                                                                                                                                                                                                                                                                                                                                                                                                                                                                                                               |
| <i>For all data inputs:</i>                                                                           |                                                                                                                                                                                                                                                                                                                                                                                        |                                                                                                                   |                                                                                                                                                                                                                                                                                                                                                                                                                                                                                                                                                                                                                                                                                                                                                                                                                                                                                                                   |
| 8                                                                                                     | Provide all data inputs in a file format from which data can be efficiently extracted (e.g., a spreadsheet as opposed to a PDF), including all relevant metadata listed in item 5. For any data inputs that cannot be shared due to ethical or legal reasons, such as third-party ownership, provide a contact name or the name of the institution that retains the right to the data. | Download of input data are available through the Global Health Data Exchange                                      | To download the data used in the analyses, please follow these links to the Global Health Data Exchange (GHDx): <ul style="list-style-type: none"> <li>- Utilisation of outpatient visits and inpatient admission, National Health Account expenditure shares: <a href="http://ghdx.healthdata.org/node/380336">http://ghdx.healthdata.org/node/380336</a></li> <li>- Total health expenditures: <a href="http://ghdx.healthdata.org/record/global-health-spending-1995-2015">http://ghdx.healthdata.org/record/global-health-spending-1995-2015</a>; <a href="http://ghdx.healthdata.org/record/global-expected-health-spending-2016-2040">http://ghdx.healthdata.org/record/global-expected-health-spending-2016-2040</a></li> <li>- Disability-adjusted-life-years: <a href="http://ghdx.healthdata.org/record/global-burden-disease-">http://ghdx.healthdata.org/record/global-burden-disease-</a></li> </ul> |

|                               |                                                                                                                                                                                                                                                                         |                                                                                                                |                                                                                                                                                                                                                                                                                                                                                    |
|-------------------------------|-------------------------------------------------------------------------------------------------------------------------------------------------------------------------------------------------------------------------------------------------------------------------|----------------------------------------------------------------------------------------------------------------|----------------------------------------------------------------------------------------------------------------------------------------------------------------------------------------------------------------------------------------------------------------------------------------------------------------------------------------------------|
|                               |                                                                                                                                                                                                                                                                         |                                                                                                                | <p>study-2016-gbd-2016-disability-adjusted-life-years-and-healthy-life</p> <p>- Population estimates:<br/> <a href="http://ghdx.healthdata.org/record/global-burden-disease-study-2016-gbd-2016-population-estimates-1950-2016">http://ghdx.healthdata.org/record/global-burden-disease-study-2016-gbd-2016-population-estimates-1950-2016</a></p> |
| <b>Data analysis</b>          |                                                                                                                                                                                                                                                                         |                                                                                                                |                                                                                                                                                                                                                                                                                                                                                    |
| 9                             | Provide a conceptual overview of the data analysis method. A diagram may be helpful.                                                                                                                                                                                    | Flow diagrams of the overall methodological processes provided in the main text and supplementary appendix.    | Main text (Methods) and supplementary appendix (Section 2)                                                                                                                                                                                                                                                                                         |
| 10                            | Provide a detailed description of all steps of the analysis, including mathematical formulae. This description should cover, as relevant, data cleaning, data pre-processing, data adjustments and weighting of data sources, and mathematical or statistical model(s). | Flow diagrams and corresponding methodological write-ups provided in the main text and supplementary appendix. | Main text (Methods) and supplementary appendix (Sections 2-5)                                                                                                                                                                                                                                                                                      |
| 11                            | Describe how candidate models were evaluated and how the final model(s) were selected.                                                                                                                                                                                  | Model evaluation provided in the main text and supplementary appendix.                                         | Main text (Methods) and supplementary appendix (Sections 4-5)                                                                                                                                                                                                                                                                                      |
| 12                            | Provide the results of an evaluation of model performance, if done, as well as the results of any relevant sensitivity analysis.                                                                                                                                        | Performance evaluation and sensitivity analyses provided in the main text and supplementary appendix.          | Main text (Methods) and supplementary appendix (Sections 4, 6, 7; Appendix tables S20, S21)                                                                                                                                                                                                                                                        |
| 13                            | Describe methods for calculating uncertainty of the estimates. State which sources of uncertainty were, and were not, accounted for in the uncertainty analysis.                                                                                                        | Description of uncertainty estimates provided in the main text and supplementary appendix.                     | Main text (Methods) and supplementary appendix (Sections 2-5)                                                                                                                                                                                                                                                                                      |
| 14                            | State how analytic or statistical source code used to generate estimates can be accessed.                                                                                                                                                                               | Code will be publicly available for access                                                                     | All code used to generate estimates is available in the Global Health Data Exchange at<br><a href="http://ghdx.healthdata.org/node/380336">http://ghdx.healthdata.org/node/380336</a>                                                                                                                                                              |
| <b>Results and Discussion</b> |                                                                                                                                                                                                                                                                         |                                                                                                                |                                                                                                                                                                                                                                                                                                                                                    |
| 15                            | Provide published estimates in a file format from which data can be efficiently extracted.                                                                                                                                                                              | Download of results data available online through Global Health Data Exchange                                  | All estimates are available in the Global Health Data Exchange at <a href="http://ghdx.healthdata.org/node/380336">http://ghdx.healthdata.org/node/380336</a>                                                                                                                                                                                      |
| 16                            | Report a quantitative measure of the uncertainty of the estimates (e.g. uncertainty intervals).                                                                                                                                                                         | Uncertainty intervals are provided with all results                                                            | All estimates with uncertainty intervals are available in the Global Health Data Exchange at<br><a href="http://ghdx.healthdata.org/node/380336">http://ghdx.healthdata.org/node/380336</a>                                                                                                                                                        |
| 17                            | Interpret results in light of existing evidence. If updating a previous set of estimates, describe the reasons for changes in estimates.                                                                                                                                | Interpretation of results is provided in main text                                                             | Main text (Research in context)                                                                                                                                                                                                                                                                                                                    |
| 18                            | Discuss limitations of the estimates. Include a discussion of any modelling assumptions or data limitations that affect interpretation of the estimates.                                                                                                                | Discussion of limitations provided in the main text and supplementary appendix                                 | Main text (Methods and Discussion) and supplementary appendix (Sections 4, 6, 7)                                                                                                                                                                                                                                                                   |



### 1.3. List of acronyms

**Table S2. List of acronyms**

| Phrase                                                             | Acronym       |
|--------------------------------------------------------------------|---------------|
| Disability-adjusted-life-year                                      | DALY          |
| DisMod-Metaregression, version 2.1.                                | DisMod-MR 2.1 |
| Global Burden of Disease                                           | GBD           |
| Global Health Data Exchange                                        | GHDx          |
| Gross Domestic Product                                             | GDP           |
| Guidelines for Accurate and Transparent Health Estimates Reporting | GATHER        |
| Health Access and Quality                                          | HAQ           |
| Institute for Health Metrics and Evaluation                        | IHME          |
| National Health Account                                            | NHA           |
| Primary sampling unit                                              | PSU           |
| Organisation for Economic Cooperation and Development              | OECD          |
| Socio-demographic Index                                            | SDI           |
| Standard error                                                     | SE            |
| Spatio-Temporal Gaussian Process Regression                        | ST-GPR        |
| Total Health Expenditure                                           | THE           |
| Universal Health Coverage                                          | UHC           |
| World Health Organization                                          | WHO           |

## Section 2. Utilisation data sources

### 2.1. Systematic Review

We searched the Global Health Data Exchange (GHDx) for population surveys, administrative records, and censuses from January 1990 to September 2016. We applied five search terms, referred to as secondary data filters in GHDx: “discharge”, “health facility”, “nationally representative”, “household”, or “outpatient.” We also applied ten keyword filters: “healthcare access”, “health care costs”, “healthcare economics”, “healthcare expenditure”, “healthcare services”, “healthcare use”, “outpatient facilities”, “patient counts”, “hospitals”, or “length of stay”. We applied no language restrictions and required all returned records to have either administrative, survey microdata, or tabulated reports.

We searched the returned records’ metadata for two measures of health service contact: 1) utilisation defined as the number of units of service used within a recall period, or 2) coverage defined as the proportion of respondents who used the service within a recall period. Figure S2

**Figure S2. Process of systematically reviewing data sources for inclusion and exclusion**

Counts reflect number of unique GHDx identification numbers. Multiple country-years may be assigned to one identification number, which explains discrepancies between counts in the figure below and counts reported elsewhere. The majority of the 696 records that were added in consultation with experts or further review of other records within a data series were sourced from administrative databases such as the World Health Organization’s Health for All Database or the European Hospital Morbidity Database.

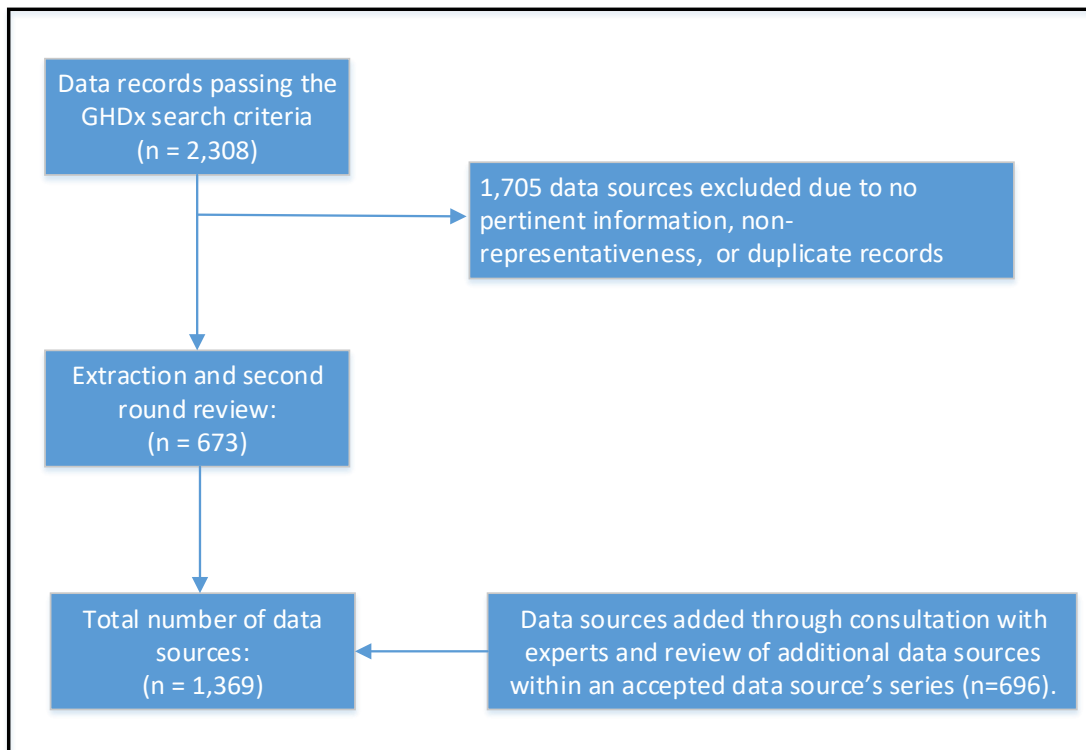

summarises the data sources that matched the search criteria, data sources that were excluded, and reasons for exclusion. We required that all measures be at the individual level and nationally or subnationally representative of outpatient visits, inpatient admissions, or general healthcare contact. If an accepted record was part of a series, we reviewed additional records in the series for inclusion, even if our initial search term did not include the record. Finally, we consulted with GBD collaborators and experts to identify relevant data sources that were either not contained within the GHDx or were excluded by our search terms.

We gathered outpatient utilisation data from 130 unique countries, spanning 1175 country-years, and inpatient data from 128 unique countries, spanning 2068 country-years. A summary of data sources by the GBD super-regions and time periods is in Table S3A, and by World Bank income categories and time periods is in Table S3B. Countries included in each GBD super-region and region are in Table S4. A list of all data sources by location and year is in Table S5, which is at the end of this document.

## 2.2. Data Extraction

The unit of analysis was average utilisation by sex and age categories, where the 23 age categories were: early neonatal (0-6 days), neonatal (7-27 days), infants (28-364 days), 1-4 years, and five-year intervals up to 90-94, and 95+ years. All administrative and survey microdata records were systematically extracted based on those categories, and we refer to an extracted estimate for a given age-sex-location-year-data source as a data point. For surveys with microdata, we extracted the individual level data and aggregated them in age and sex categories. For surveys without microdata, we extracted tabulated measures. When measures were reported in wide age intervals (e.g. all ages), we did age-splitting, as described in Section 4.4, Age-sex splitting. An exception was inpatient admissions for the early neonatal age category (0-6 days), for which we used the proportion of facility-based deliveries as an estimate of admissions per neonate.<sup>1</sup>

We used reported survey design variables such as sample weights, strata, and primary sampling units (PSUs) to calculate the mean of each data point and associated standard errors (SEs). When a specific surveys design variable was missing in greater than 10% of respondents, we dropped the survey design variable from the analysis. When neither the strata nor PSUs were available to estimate uncertainty, we used the sample size,  $ss$ , and mean,  $\mu$ , of the data point to calculate SEs. When the product of the mean and sample size exceeded five we used equation (1) to calculate SEs:

$$SE = \frac{\sqrt{\mu \cdot ss}}{ss} \quad (1)$$

When the product of the mean and the sample size was less than or equal to five, we used equation (2) to calculate SEs.

$$SE = \frac{(5 - \mu \cdot ss)}{ss} + \frac{\mu \cdot ss \sqrt{\frac{5}{ss^2}}}{5} \quad (2)$$

When survey data included details on the type of provider, we excluded services provided by spiritual and religious healers. When microdata were not available we extracted reported tabulations.

We relied on the administrative and survey data sources to precisely define the units of service and to accurately count multiple units, such as visits to a general practitioner and specialist on the same day. This was important for outpatient visits, where 41.9% of the data sources were surveys, and a person could have more than one appointment at a facility each day. Some interviewer guides, such as the U.S. National Health Interview Survey's Manual, carefully defined doctor visits and gave instructions to consistently count visits when the patient sees: 1) two or more doctors, 2) a doctor and medical assistant under his/her supervision, and 3) two medical assistants supervised by different doctors.<sup>2</sup> We did not however, check the interviewer guide for every survey data source.

**Table S3A. Descriptive statistics on administrative and survey data sources by GBD super-region and time period**

Table displays counts of data sources by GBD super-region and time period, percentage of sources that were administrative data or survey data by GBD super-region, and number of countries with at least one data source or one administrative data source. GBD= Global Burden of Disease.

|                                                  | Time period |             |             |             | Data Source as percentage of total |              | Number of countries with at least one data source |                                                      |
|--------------------------------------------------|-------------|-------------|-------------|-------------|------------------------------------|--------------|---------------------------------------------------|------------------------------------------------------|
|                                                  | Pre 1990    | 1990 - 2005 | 2005 - 2016 | Total       | Administrative data                | Survey data  | At least one data source (percentage)             | At least one administrative data source (percentage) |
| <b>Outpatient Total</b>                          | <b>6</b>    | <b>526</b>  | <b>643</b>  | <b>1175</b> | <b>59.1%</b>                       | <b>40.9%</b> | <b>130 (66.7%)</b>                                | <b>51 (26.2 %)</b>                                   |
| Central Europe, Eastern Europe, and Central Asia | 0           | 176         | 246         | 422         | 85.1%                              | 14.9%        | 27 (93.1%)                                        | 24 (82.8%)                                           |
| High-income                                      | 4           | 168         | 249         | 421         | 60.6%                              | 39.4%        | 30 (85.7%)                                        | 21 (61.8%)                                           |
| Latin America and Caribbean                      | 2           | 59          | 48          | 109         | 26.6%                              | 73.4%        | 22 (68.8%)                                        | 2 (6.3%)                                             |
| North Africa and Middle East                     | 0           | 24          | 19          | 43          | 34.9%                              | 65.1%        | 17 (81.0%)                                        | 1 (4.8%)                                             |
| South Asia                                       | 0           | 9           | 3           | 12          | 0.0%                               | 100.0%       | 4 (80.0 %)                                        | 0 (0.0 %)                                            |
| Southeast Asia, East Asia, and Oceania           | 0           | 46          | 31          | 77          | 29.9%                              | 70.1%        | 11 (39.3%)                                        | 2 (7.1%)                                             |
| Sub-Saharan Africa                               | 0           | 44          | 47          | 91          | 14.3%                              | 85.7%        | 19 (41.3%)                                        | 1 (2.2%)                                             |
| <b>Inpatient Total</b>                           | <b>369</b>  | <b>992</b>  | <b>707</b>  | <b>2068</b> | <b>80.3%</b>                       | <b>19.7%</b> | <b>125 (64.1%)</b>                                | <b>60 (30.8%)</b>                                    |
| Central Europe, Eastern Europe, and Central Asia | 189         | 416         | 271         | 876         | 90.9%                              | 9.1%         | 27 (93.1%)                                        | 25 (86.2%)                                           |
| High-income                                      | 167         | 410         | 327         | 904         | 82.5%                              | 17.5%        | 30 (85.7%)                                        | 27 (79.4%)                                           |
| Latin America and Caribbean                      | 2           | 58          | 41          | 101         | 42.6%                              | 57.4%        | 18 (56.3%)                                        | 3 (9.4%)                                             |
| North Africa and Middle East                     | 10          | 30          | 13          | 53          | 66.0%                              | 34.0%        | 13 (61.9%)                                        | 1 (4.8%)                                             |
| South Asia                                       | 0           | 8           | 2           | 10          | 0.0%                               | 100.0%       | 4 (80.0%)                                         | 0 (0.0%)                                             |
| Southeast Asia, East Asia, and Oceania           | 1           | 46          | 26          | 73          | 35.6%                              | 64.4%        | 12 (42.9%)                                        | 1 (3.6%)                                             |
| Sub-Saharan Africa                               | 0           | 24          | 27          | 51          | 29.4%                              | 70.6%        | 21 (45.7%)                                        | 3 (6.5%)                                             |

**Table S3B. Descriptive statistics on administrative and survey data sources by World Bank income categories and time period**

Table displays counts of data sources by GBD super-region and time period, percentage of sources that were administrative data or survey data by World Bank income categories, and number of countries with at least one data source or one administrative data source.

|                         | Time Period |             |             |             | Data Source as percentage of total |              | Number of countries with at least one data source |                                                      |
|-------------------------|-------------|-------------|-------------|-------------|------------------------------------|--------------|---------------------------------------------------|------------------------------------------------------|
|                         | Pre 1990    | 1990 - 2005 | 2005 - 2016 | Total       | Administrative data                | Survey data  | At least one data source (percentage)             | At least one administrative data source (percentage) |
| <b>Outpatient Total</b> | <b>6</b>    | <b>526</b>  | <b>643</b>  | <b>1175</b> | <b>59.1%</b>                       | <b>40.9%</b> | <b>130 (66.7%)</b>                                | <b>51 (26.2%)</b>                                    |
| Low income              | 0           | 19          | 17          | 36          | 0.0%                               | 100.0%       | 14 (45.2%)                                        | 0 (0.0%)                                             |
| Lower middle income     | 0           | 93          | 97          | 190         | 46.3%                              | 53.7%        | 32 (61.5%)                                        | 5 (9.6%)                                             |
| Upper middle income     | 2           | 167         | 185         | 354         | 59.6%                              | 40.4%        | 36 (66.7%)                                        | 16 (29.6%)                                           |
| High income             | 4           | 247         | 344         | 595         | 66.4%                              | 33.6%        | 48 (82.8%)                                        | 30 (51.7%)                                           |
| <b>Inpatient Total</b>  | <b>369</b>  | <b>992</b>  | <b>707</b>  | <b>2068</b> | <b>80.3%</b>                       | <b>19.7%</b> | <b>125 (64.1%)</b>                                | <b>60 (30.8%)</b>                                    |
| Low income              | 0           | 11          | 12          | 23          | 21.7%                              | 78.3%        | 14 (45.2%)                                        | 1 (3.2%)                                             |
| Lower middle income     | 64          | 175         | 122         | 361         | 75.6%                              | 24.4%        | 34 (65.4%)                                        | 9 (17.3%)                                            |
| Upper middle income     | 76          | 258         | 167         | 501         | 77.6%                              | 22.4%        | 34 (63.0%)                                        | 15 (27.8%)                                           |
| High income             | 229         | 548         | 406         | 1183        | 84.0%                              | 16.0%        | 43 (74.1%)                                        | 35 (60.3%)                                           |

**Table S4. Locations characterised by GBD super-region and region**

| Location               | ISO Code | Region                       | Super region                                     |
|------------------------|----------|------------------------------|--------------------------------------------------|
| Afghanistan            | AFG      | North Africa and Middle East | North Africa and Middle East                     |
| Albania                | ALB      | Central Europe               | Central Europe, Eastern Europe, and Central Asia |
| Algeria                | DZA      | North Africa and Middle East | North Africa and Middle East                     |
| American Samoa         | ASM      | Oceania                      | Southeast Asia, East Asia, and Oceania           |
| Andorra                | AND      | Western Europe               | High-income                                      |
| Angola                 | AGO      | Central sub-Saharan Africa   | Sub-Saharan Africa                               |
| Antigua and Barbuda    | ATG      | Caribbean                    | Latin America and Caribbean                      |
| Argentina              | ARG      | Southern Latin America       | High-income                                      |
| Armenia                | ARM      | Central Asia                 | Central Europe, Eastern Europe, and Central Asia |
| Australia              | AUS      | Australasia                  | High-income                                      |
| Austria                | AUT      | Western Europe               | High-income                                      |
| Azerbaijan             | AZE      | Central Asia                 | Central Europe, Eastern Europe, and Central Asia |
| Bahrain                | BHR      | North Africa and Middle East | North Africa and Middle East                     |
| Bangladesh             | BGD      | South Asia                   | South Asia                                       |
| Barbados               | BRB      | Caribbean                    | Latin America and Caribbean                      |
| Belarus                | BLR      | Eastern Europe               | Central Europe, Eastern Europe, and Central Asia |
| Belgium                | BEL      | Western Europe               | High-income                                      |
| Belize                 | BLZ      | Caribbean                    | Latin America and Caribbean                      |
| Benin                  | BEN      | Western sub-Saharan Africa   | Sub-Saharan Africa                               |
| Bermuda                | BMU      | Caribbean                    | Latin America and Caribbean                      |
| Bhutan                 | BTN      | South Asia                   | South Asia                                       |
| Bolivia                | BOL      | Andean Latin America         | Latin America and Caribbean                      |
| Bosnia and Herzegovina | BIH      | Central Europe               | Central Europe, Eastern Europe, and Central Asia |
| Botswana               | BWA      | Southern sub-Saharan Africa  | Sub-Saharan Africa                               |
| Brazil                 | BRA      | Tropical Latin America       | Latin America and Caribbean                      |
| Brunei                 | BRN      | High-income Asia Pacific     | High-income                                      |
| Bulgaria               | BGR      | Central Europe               | Central Europe, Eastern Europe, and Central Asia |
| Burkina Faso           | BFA      | Western sub-Saharan Africa   | Sub-Saharan Africa                               |
| Burundi                | BDI      | Eastern sub-Saharan Africa   | Sub-Saharan Africa                               |
| Cambodia               | KHM      | Southeast Asia               | Southeast Asia, East Asia, and Oceania           |
| Cameroon               | CMR      | Western sub-Saharan Africa   | Sub-Saharan Africa                               |

|                                |     |                              |                                                  |
|--------------------------------|-----|------------------------------|--------------------------------------------------|
| Canada                         | CAN | High-income North America    | High-income                                      |
| Cape Verde                     | CPV | Western sub-Saharan Africa   | Sub-Saharan Africa                               |
| Central African Republic       | CAF | Central sub-Saharan Africa   | Sub-Saharan Africa                               |
| Chad                           | TCD | Western sub-Saharan Africa   | Sub-Saharan Africa                               |
| Chile                          | CHL | Southern Latin America       | High-income                                      |
| China                          | CHN | East Asia                    | Southeast Asia, East Asia, and Oceania           |
| Colombia                       | COL | Central Latin America        | Latin America and Caribbean                      |
| Comoros                        | COM | Eastern sub-Saharan Africa   | Sub-Saharan Africa                               |
| Congo                          | COG | Central sub-Saharan Africa   | Sub-Saharan Africa                               |
| Costa Rica                     | CRI | Central Latin America        | Latin America and Caribbean                      |
| Cote d'Ivoire                  | CIV | Western sub-Saharan Africa   | Sub-Saharan Africa                               |
| Croatia                        | HRV | Central Europe               | Central Europe, Eastern Europe, and Central Asia |
| Cuba                           | CUB | Caribbean                    | Latin America and Caribbean                      |
| Cyprus                         | CYP | Western Europe               | High-income                                      |
| Czech Republic                 | CZE | Central Europe               | Central Europe, Eastern Europe, and Central Asia |
| DR Congo                       | COD | Central sub-Saharan Africa   | Sub-Saharan Africa                               |
| Denmark                        | DNK | Western Europe               | High-income                                      |
| Djibouti                       | DJI | Eastern sub-Saharan Africa   | Sub-Saharan Africa                               |
| Dominica                       | DMA | Caribbean                    | Latin America and Caribbean                      |
| Dominican Republic             | DOM | Caribbean                    | Latin America and Caribbean                      |
| Ecuador                        | ECU | Andean Latin America         | Latin America and Caribbean                      |
| Egypt                          | EGY | North Africa and Middle East | North Africa and Middle East                     |
| El Salvador                    | SLV | Central Latin America        | Latin America and Caribbean                      |
| England                        | ENG | Western Europe               | High-income                                      |
| Equatorial Guinea              | GNQ | Central sub-Saharan Africa   | Sub-Saharan Africa                               |
| Eritrea                        | ERI | Eastern sub-Saharan Africa   | Sub-Saharan Africa                               |
| Estonia                        | EST | Eastern Europe               | Central Europe, Eastern Europe, and Central Asia |
| Ethiopia                       | ETH | Eastern sub-Saharan Africa   | Sub-Saharan Africa                               |
| Federated States of Micronesia | FSM | Oceania                      | Southeast Asia, East Asia, and Oceania           |
| Fiji                           | FJI | Oceania                      | Southeast Asia, East Asia, and Oceania           |
| Finland                        | FIN | Western Europe               | High-income                                      |
| France                         | FRA | Western Europe               | High-income                                      |
| Gabon                          | GAB | Central sub-Saharan Africa   | Sub-Saharan Africa                               |
| Georgia                        | GEO | Central Asia                 | Central Europe, Eastern Europe, and Central Asia |
| Germany                        | DEU | Western Europe               | High-income                                      |

|               |     |                              |                                                  |
|---------------|-----|------------------------------|--------------------------------------------------|
| Ghana         | GHA | Western sub-Saharan Africa   | Sub-Saharan Africa                               |
| Greece        | GRC | Western Europe               | High-income                                      |
| Greenland     | GRL | High-income North America    | High-income                                      |
| Grenada       | GRD | Caribbean                    | Latin America and Caribbean                      |
| Guam          | GUM | Oceania                      | Southeast Asia, East Asia, and Oceania           |
| Guatemala     | GTM | Central Latin America        | Latin America and Caribbean                      |
| Guinea        | GIN | Western sub-Saharan Africa   | Sub-Saharan Africa                               |
| Guinea-Bissau | GNB | Western sub-Saharan Africa   | Sub-Saharan Africa                               |
| Guyana        | GUY | Caribbean                    | Latin America and Caribbean                      |
| Haiti         | HTI | Caribbean                    | Latin America and Caribbean                      |
| Honduras      | HND | Central Latin America        | Latin America and Caribbean                      |
| Hungary       | HUN | Central Europe               | Central Europe, Eastern Europe, and Central Asia |
| Iceland       | ISL | Western Europe               | High-income                                      |
| India         | IND | South Asia                   | South Asia                                       |
| Indonesia     | IDN | Southeast Asia               | Southeast Asia, East Asia, and Oceania           |
| Iran          | IRN | North Africa and Middle East | North Africa and Middle East                     |
| Iraq          | IRQ | North Africa and Middle East | North Africa and Middle East                     |
| Ireland       | IRL | Western Europe               | High-income                                      |
| Israel        | ISR | Western Europe               | High-income                                      |
| Italy         | ITA | Western Europe               | High-income                                      |
| Jamaica       | JAM | Caribbean                    | Latin America and Caribbean                      |
| Japan         | JPN | High-income Asia Pacific     | High-income                                      |
| Jordan        | JOR | North Africa and Middle East | North Africa and Middle East                     |
| Kazakhstan    | KAZ | Central Asia                 | Central Europe, Eastern Europe, and Central Asia |
| Kenya         | KEN | Eastern sub-Saharan Africa   | Sub-Saharan Africa                               |
| Kiribati      | KIR | Oceania                      | Southeast Asia, East Asia, and Oceania           |
| Kuwait        | KWT | North Africa and Middle East | North Africa and Middle East                     |
| Kyrgyzstan    | KGZ | Central Asia                 | Central Europe, Eastern Europe, and Central Asia |
| Laos          | LAO | Southeast Asia               | Southeast Asia, East Asia, and Oceania           |
| Latvia        | LVA | Eastern Europe               | Central Europe, Eastern Europe, and Central Asia |
| Lebanon       | LBN | North Africa and Middle East | North Africa and Middle East                     |
| Lesotho       | LSO | Southern sub-Saharan Africa  | Sub-Saharan Africa                               |
| Liberia       | LBR | Western sub-Saharan Africa   | Sub-Saharan Africa                               |
| Libya         | LYB | North Africa and Middle East | North Africa and Middle East                     |
| Lithuania     | LTU | Eastern Europe               | Central Europe, Eastern Europe, and Central Asia |
| Luxembourg    | LUX | Western Europe               | High-income                                      |



|                          |     |                              |                                                  |
|--------------------------|-----|------------------------------|--------------------------------------------------|
| Macedonia                | MKD | Central Europe               | Central Europe, Eastern Europe, and Central Asia |
| Madagascar               | MDG | Eastern sub-Saharan Africa   | Sub-Saharan Africa                               |
| Malawi                   | MWI | Eastern sub-Saharan Africa   | Sub-Saharan Africa                               |
| Malaysia                 | MYS | Southeast Asia               | Southeast Asia, East Asia, and Oceania           |
| Maldives                 | MDV | Southeast Asia               | Southeast Asia, East Asia, and Oceania           |
| Mali                     | MLI | Western sub-Saharan Africa   | Sub-Saharan Africa                               |
| Malta                    | MLT | Western Europe               | High-income                                      |
| Marshall Islands         | MHL | Oceania                      | Southeast Asia, East Asia, and Oceania           |
| Mauritania               | MRT | Western sub-Saharan Africa   | Sub-Saharan Africa                               |
| Mauritius                | MUS | Southeast Asia               | Southeast Asia, East Asia, and Oceania           |
| Mexico                   | MEX | Central Latin America        | Latin America and Caribbean                      |
| Moldova                  | MDA | Eastern Europe               | Central Europe, Eastern Europe, and Central Asia |
| Mongolia                 | MNG | Central Asia                 | Central Europe, Eastern Europe, and Central Asia |
| Montenegro               | MNE | Central Europe               | Central Europe, Eastern Europe, and Central Asia |
| Morocco                  | MAR | North Africa and Middle East | North Africa and Middle East                     |
| Mozambique               | MOZ | Eastern sub-Saharan Africa   | Sub-Saharan Africa                               |
| Myanmar                  | MMR | Southeast Asia               | Southeast Asia, East Asia, and Oceania           |
| Namibia                  | NAM | Southern sub-Saharan Africa  | Sub-Saharan Africa                               |
| Nepal                    | NPL | South Asia                   | South Asia                                       |
| Netherlands              | NLD | Western Europe               | High-income                                      |
| New Zealand              | NZL | Australasia                  | High-income                                      |
| Nicaragua                | NIC | Central Latin America        | Latin America and Caribbean                      |
| Niger                    | NER | Western sub-Saharan Africa   | Sub-Saharan Africa                               |
| Nigeria                  | NGA | Western sub-Saharan Africa   | Sub-Saharan Africa                               |
| North Korea              | PRK | East Asia                    | Southeast Asia, East Asia, and Oceania           |
| Northern Ireland         | NIR | Western Europe               | High-income                                      |
| Northern Mariana Islands | MNP | Oceania                      | Southeast Asia, East Asia, and Oceania           |
| Norway                   | NOR | Western Europe               | High-income                                      |
| Oman                     | OMN | North Africa and Middle East | North Africa and Middle East                     |
| Pakistan                 | PAK | South Asia                   | South Asia                                       |
| Palestine                | PSE | North Africa and Middle East | North Africa and Middle East                     |
| Panama                   | PAN | Central Latin America        | Latin America and Caribbean                      |
| Papua New Guinea         | PNG | Oceania                      | Southeast Asia, East Asia, and Oceania           |
| Paraguay                 | PRY | Tropical Latin America       | Latin America and Caribbean                      |
| Peru                     | PER | Andean Latin America         | Latin America and Caribbean                      |
| Philippines              | PHL | Southeast Asia               | Southeast Asia, East Asia, and Oceania           |

|                                  |     |                              |                                                  |
|----------------------------------|-----|------------------------------|--------------------------------------------------|
| Poland                           | POL | Central Europe               | Central Europe, Eastern Europe, and Central Asia |
| Portugal                         | PRT | Western Europe               | High-income                                      |
| Puerto Rico                      | PRI | Caribbean                    | Latin America and Caribbean                      |
| Qatar                            | QAT | North Africa and Middle East | North Africa and Middle East                     |
| Romania                          | ROU | Central Europe               | Central Europe, Eastern Europe, and Central Asia |
| Russia                           | RUS | Eastern Europe               | Central Europe, Eastern Europe, and Central Asia |
| Rwanda                           | RWA | Eastern sub-Saharan Africa   | Sub-Saharan Africa                               |
| Saint Lucia                      | LCA | Caribbean                    | Latin America and Caribbean                      |
| Saint Vincent and the Grenadines | VCT | Caribbean                    | Latin America and Caribbean                      |
| Samoa                            | WSM | Oceania                      | Southeast Asia, East Asia, and Oceania           |
| Sao Tome and Principe            | STP | Western sub-Saharan Africa   | Sub-Saharan Africa                               |
| Saudi Arabia                     | SAU | North Africa and Middle East | North Africa and Middle East                     |
| Scotland                         | SCT | Western Europe               | High-income                                      |
| Senegal                          | SEN | Western sub-Saharan Africa   | Sub-Saharan Africa                               |
| Serbia                           | SRB | Central Europe               | Central Europe, Eastern Europe, and Central Asia |
| Seychelles                       | SYC | Southeast Asia               | Southeast Asia, East Asia, and Oceania           |
| Sierra Leone                     | SLE | Western sub-Saharan Africa   | Sub-Saharan Africa                               |
| Singapore                        | SGP | High-income Asia Pacific     | High-income                                      |
| Slovakia                         | SVK | Central Europe               | Central Europe, Eastern Europe, and Central Asia |
| Slovenia                         | SVN | Central Europe               | Central Europe, Eastern Europe, and Central Asia |
| Solomon Islands                  | SLB | Oceania                      | Southeast Asia, East Asia, and Oceania           |
| Somalia                          | SOM | Eastern sub-Saharan Africa   | Sub-Saharan Africa                               |
| South Africa                     | ZAF | Southern sub-Saharan Africa  | Sub-Saharan Africa                               |
| South Korea                      | KOR | High-income Asia Pacific     | High-income                                      |
| South Sudan                      | SSD | Eastern sub-Saharan Africa   | Sub-Saharan Africa                               |
| Spain                            | ESP | Western Europe               | High-income                                      |
| Sri Lanka                        | LKA | Southeast Asia               | Southeast Asia, East Asia, and Oceania           |
| Sudan                            | SDN | North Africa and Middle East | North Africa and Middle East                     |
| Suriname                         | SUR | Caribbean                    | Latin America and Caribbean                      |
| Swaziland                        | SWZ | Southern sub-Saharan Africa  | Sub-Saharan Africa                               |
| Sweden                           | SWE | Western Europe               | High-income                                      |
| Switzerland                      | CHE | Western Europe               | High-income                                      |
| Syria                            | SYR | North Africa and Middle East | North Africa and Middle East                     |
| Taiwan                           | TWN | East Asia                    | Southeast Asia, East Asia, and Oceania           |
| Tajikistan                       | TJK | Central Asia                 | Central Europe, Eastern Europe, and Central Asia |

|                      |     |                              |                                                  |
|----------------------|-----|------------------------------|--------------------------------------------------|
| Tanzania             | TZA | Eastern sub-Saharan Africa   | Sub-Saharan Africa                               |
| Thailand             | THA | Southeast Asia               | Southeast Asia, East Asia, and Oceania           |
| The Bahamas          | BHS | Caribbean                    | Latin America and Caribbean                      |
| The Gambia           | GMB | Western sub-Saharan Africa   | Sub-Saharan Africa                               |
| Timor-Leste          | TLS | Southeast Asia               | Southeast Asia, East Asia, and Oceania           |
| Togo                 | TGO | Western sub-Saharan Africa   | Sub-Saharan Africa                               |
| Tonga                | TON | Oceania                      | Southeast Asia, East Asia, and Oceania           |
| Trinidad and Tobago  | TTO | Caribbean                    | Latin America and Caribbean                      |
| Tunisia              | TUN | North Africa and Middle East | North Africa and Middle East                     |
| Turkey               | TUR | North Africa and Middle East | North Africa and Middle East                     |
| Turkmenistan         | TKM | Central Asia                 | Central Europe, Eastern Europe, and Central Asia |
| Uganda               | UGA | Eastern sub-Saharan Africa   | Sub-Saharan Africa                               |
| Ukraine              | UKR | Eastern Europe               | Central Europe, Eastern Europe, and Central Asia |
| United Arab Emirates | ARE | North Africa and Middle East | North Africa and Middle East                     |
| United States        | USA | High-income North America    | High-income                                      |
| Uruguay              | URY | Southern Latin America       | High-income                                      |
| Uzbekistan           | UZB | Central Asia                 | Central Europe, Eastern Europe, and Central Asia |
| Vanuatu              | VUT | Oceania                      | Southeast Asia, East Asia, and Oceania           |
| Venezuela            | VEN | Central Latin America        | Latin America and Caribbean                      |
| Vietnam              | VNM | Southeast Asia               | Southeast Asia, East Asia, and Oceania           |
| Virgin Islands, U.S. | VIR | Caribbean                    | Latin America and Caribbean                      |
| Wales                | WLS | Western Europe               | High-income                                      |
| Yemen                | YEM | North Africa and Middle East | North Africa and Middle East                     |
| Zambia               | ZMB | Eastern sub-Saharan Africa   | Sub-Saharan Africa                               |
| Zimbabwe             | ZWE | Southern sub-Saharan Africa  | Sub-Saharan Africa                               |

## Section 3. Utilisation data grouping and adjustments

### 3.1. Inconsistencies across data sources

Measures of utilisation and recall periods were not consistent across surveys (Table S6). As noted above, health service contacts were reported as either utilisation or coverage in the available data. Among survey data, utilisation was measured in 196 (40.7%) of surveys with outpatient data and 117 (28.7%) with inpatient data. In querying respondents, 186 (38.7%) surveys did not distinguish the type of service (outpatient or inpatient care) and were analysed with the outpatient data. Among outpatient surveys, 138 (28.7%) restricted utilisation questions to people who had been ill. Further, the recall period of questions varied across

**Table S6. Descriptive statistics on survey by recall period, health services questions, and units of service**

Table displays number (percentage) of surveys gathered by recall period, phrasing of the questions, and service measure (utilisation or coverage).

|                                                                                   | Outpatient number | Outpatient percentage | Inpatient number | Inpatient percentage |
|-----------------------------------------------------------------------------------|-------------------|-----------------------|------------------|----------------------|
| <b>Total number of surveys</b>                                                    | <b>481</b>        |                       | <b>407</b>       |                      |
| <b>Recall period</b>                                                              |                   |                       |                  |                      |
| 2 weeks                                                                           | 69                | 14.3%                 | 10               | 2.5%                 |
| 2.1 weeks (15 days)                                                               | 3                 | 0.6%                  | ..               | ..                   |
| 4 weeks                                                                           | 84                | 17.5%                 | 29               | 7.1%                 |
| 4.3 weeks                                                                         | 131               | 27.2%                 | 84               | 20.6%                |
| 8.6 weeks (2 months)                                                              | 8                 | 1.7%                  | 1                | 0.2%                 |
| 12.9 weeks (3 months)                                                             | 39                | 8.1%                  | 29               | 7.1%                 |
| 17 weeks (4 months)                                                               | 4                 | 0.8%                  | 2                | 0.5%                 |
| 26 weeks (6 months)                                                               | 9                 | 1.9%                  | 3                | 0.7%                 |
| One Year                                                                          | 134               | 27.9%                 | 249              | 61.2%                |
| <b>Question specifies outpatient and inpatient services</b>                       |                   |                       |                  |                      |
| Use of specific service                                                           | 295               | 61.3%                 | 407              | 100.0%               |
| Use of any services, without distinguishing outpatient or inpatient               | 186               | 38.7%                 | ..               | ..                   |
| <b>Question specifies recent illness</b>                                          |                   |                       |                  |                      |
| Use of services regardless of health status, i.e. may include preventive care     | 343               | 71.3%                 | 407              | 100.0%               |
| Specifies person in household with a recent illness or injury                     | 138               | 28.7%                 | ..               | ..                   |
| <b>Question on utilisation vs coverage</b>                                        |                   |                       |                  |                      |
| Utilisation, defined as a number of units of service used within a recall period  | 196               | 40.7%                 | 117              | 28.7%                |
| Coverage, defined as a proportion of people who used service within recall period | 285               | 59.3%                 | 290              | 71.3%                |

surveys, such as two weeks, 15 days, one month, 30 days, or two months. Longer recall periods have been reported to be biased.<sup>3-5</sup>

We sought to produce valid and consistent estimates while making use of all available information. To accomplish this, we reconciled inconsistent measures in three steps: 1) assigned a reference data sources that most closely matched our case definition, 2) grouped reported measures into consistent recall bins, and 3) quantified and adjusted for differences across data sources.

### 3.2. Assignment of reference data sources

Our case definition was nationally representative, annual utilisation rate per capita. See the Definition of utilisation section of the main text for the corresponding functional categories of the National Health Accounts (NHA). The data sources that most closely matched this definition were annually reported, administrative records from either national sources or facility-level health information system data, and free of recall bias. Examples are the World Health Organization’s European Hospital Morbidity Database, and Health for All database, the Organisation for Economic Cooperation and Development database, United States’ Healthcare Cost and Utilisation Project data, and the Institute for Health Metrics and Evaluation’s (IHME’s) Access, Bottlenecks, Costs, and Equity survey. When data were reported by more than one source, such as the European Hospital Morbidity Database and Health for All database, we used only the most detailed one. All of the administrative sources reported in Table S3 were reference data, and all reference source are noted in Table S5.

### 3.3. Data grouping

Survey recall periods varied substantially (Table S6). We sought to improve the uniformity of the data by grouping data from population-based surveys into bins based on the recall period. We grouped outpatient data into four recall bins of: two weeks, 30 days, three months, and one year. We grouped inpatient data into two recall bins of: 30 days, and one year. Other recall periods were grouped into a bins selected on the basis of breaks in the frequency of recall periods. Assignments of surveys into bins was based on proximity to the nearest bin (Table S7).

For surveys reporting utilisation rates in recall periods not exactly matching the assigned recall bin such as 15 days instead of two weeks, we multiplied the data point mean by a constant,  $k$ , where  $k = \frac{t_{new}}{t_{old}}$  and  $t_{old}$  represents the survey reported recall period and  $t_{new}$  represents the recall period of the assigned bin. Coefficients of variation were used to calculate new standard errors for the adjusted data points.

**Table S7. Grouping of survey recall periods**

Table displays how survey recalls periods were grouped into bins to improve the consistency of the data.

| Model             | Survey recall bins    | Survey recall period                                                       |
|-------------------|-----------------------|----------------------------------------------------------------------------|
| <b>Outpatient</b> | 2 weeks               | 2 weeks, 2.1 weeks (15 days)                                               |
|                   | 30 days (4.3 weeks)   | 4 weeks, 30 days, one month, 2 months (8.6 weeks)                          |
|                   | 3 months (12.9 weeks) | 3 months, 4 months (17.2 weeks), 6 months (26 weeks)                       |
|                   | One year (52 weeks)   | One year                                                                   |
| <b>Inpatient</b>  | 30 days               | 2 weeks, 4 weeks, 30 days, 1 month, 2 months, 3 months, 4 months, 6 months |
|                   | One year (52 weeks)   | One year                                                                   |

For surveys reporting proportions who used services in recall periods that didn't exactly match the assigned recall bins, the adjustment assumed an exponential decline in recall. To adjust reported proportions and propagate uncertainty, we took draws from a normal distribution where the mean was the logit transformed reported proportion,  $p_{old}$ , and the SE was the SE of  $p_{old}$  converted to logit space by way of the delta method. These draws were then back transformed to a proportion. This procedure was taken to generate draws of  $p_{old}$  bounded between zero and one that matched the reported standard error. The draws of  $p_{old}$  were then converted to rates,  $r$ , by  $r = \frac{-\ln(1-p_{old})}{t_{old}}$ . Using the rates and the recall period of the assigned recall bin,  $t_{new}$ , we calculated a new proportion,  $p_{new}$ , by  $p_{new} = 1 - e^{-r \cdot t_{new}}$ . The mean of the draws was the point estimate, and the 95% uncertainty interval was calculated from the draws.

### 3.4 Data adjustments

We accounted for discrepancies between reference data sources and survey data types. A survey data type was defined by service (outpatient or inpatient), reported measure (utilisation or coverage), and assigned recall bin (2 weeks, 30-day, three months, one year). We used two methods to adjust for survey data types that differed from reference data types: dichotomous covariates, and age-spline adjustments. When survey data types differed systematically and multiplicatively from reference data sources, we adjusted for the difference with dichotomous covariates within the DisMod-MR 2.1 model. More details on this procedure may be found in Section 4.2. When survey data types didn't differ systematically and multiplicatively from reference data types, we used age-spline regressions to adjust for the differences as described in the succeeding Section 3.4.1. For example, the number of inpatient admissions reported with one-year recall showed over-reporting for the youngest and oldest age categories, and under-reporting for the middle age categories relative to the reference data. We documented the process of adjusting each survey data type to the reference data type (Table S8). All analyses and adjustments were done with Python, version 2.7. (Python Software Foundation. Available at <http://www.python.org>.)

We used visual inspection to determine whether or not the survey data differed systematically and multiplicatively from the reference data sources. We estimated the DisMod-MR regression model with covariates for each data adjustment (See Section 4.2), and we created a figure to compare the utilisation estimates by age with the data points. If the estimates for an adjustment weren't consistently above or below the data points for any age categories, we concluded that the inconsistencies did not differ by age category.

The age-spline adjustments addressed differences across data sources by age, but not location. As reported in Table S8, the reference data were used in the age-spline adjustments for inpatient utilisation with recall for 1-year, inpatient coverage with recall for 1-year and 1-month, and outpatient coverage with recall for 1-year. For inpatient utilisation with 1-year recall, the adjustment assumed that relationship of the respondents' recall and patient's age is the same across super-regions. For the coverage data, the adjustment added the assumption that the relationship between utilisation and coverage across age groups is the same across super-regions. For example, the adjustment assumed then when a child who used a service during the recall period, the number of units of service was the same across super-regions.

The metaregression analysis adjusted for recall and location, but not the interaction between them. The reference data were also used in the metaregression analysis to adjust utilisation rates reported in surveys compared to administrative sources. The adjustment assumed that the relationship between survey responses and administrative data is the same across super-regions.

**Table S8. Survey data types and methods of adjustment**

Table displays reported survey data type (recall period and reported measure), the method of adjustment, and the equivalent data type after adjustment. All reported measures were adjusted to the reference data in the final DisMod-MR estimates.

| <b>Model</b>      | <b>Recall period</b> | <b>Reported measure</b>     | <b>Method of adjustment</b> | <b>Equivalent data type after adjustment</b> |
|-------------------|----------------------|-----------------------------|-----------------------------|----------------------------------------------|
| <b>Outpatient</b> | Two weeks            | Utilisation                 | Dichotomous covariate       | Reference data source                        |
|                   | Two weeks            | Proportion who used service | Age-spline adjustment       | Two-week utilisation recall                  |
|                   | 30 days              | Utilisation                 | Dichotomous covariate       | Reference data source                        |
|                   | 30 days              | Proportion who used service | Age-spline adjustment       | 30 day utilisation recall                    |
|                   | Three months         | Utilisation                 | Dichotomous covariate       | Reference data source                        |
|                   | Three months         | Proportion who used service | Age-spline adjustment       | Three-month utilisation recall               |
|                   | One-year             | Utilisation                 | Dichotomous covariate       | Reference data source                        |
|                   | One-year             | Proportion who used service | Age-spline adjustment       | Reference data source                        |
| <b>Inpatient</b>  | 30 days              | Proportion who used service | Age-spline adjustment       | Reference data source                        |
|                   | One-year             | Utilisation                 | Age-spline adjustment       | Reference data source                        |
|                   | One-year             | Proportion who used service | Age-spline adjustment       | Reference data source                        |

### 3.4.1 Inpatient data adjustments for data varying by age and sex

To adjust for inconsistent data that differed by age, such as the one-year recall biases for inpatient admissions, we estimated adjustment factors with penalised spline regressions. The penalised spline regression produced flexible and non-linear estimates across age categories. We calculated the ratio of the point estimate from the reference data,  $\mu_{ref}$ , to the survey data,  $\mu_s$ . We fit these ratios with a penalised spline regression shown in equation (3):

$$\ln\left(\frac{\mu_{ref,i}}{\mu_{s,i}}\right) = \beta_0 + h(age_i) + \varepsilon_i \quad (3)$$

Where  $i$  denotes a given matched observation,  $h(age_i)$  represents a basis function which estimated a cross-validated penalised spline over the population weighted mean age of the age category, and  $\varepsilon$  represents the residual. To adjust survey data to reference data, we multiplied survey data by the exponentiated predictions from respective penalised spline regressions (adjustment factor).

We accounted for uncertainty from the adjustments for using equation (4):

$$se_a = \sqrt{se_m^2 \cdot se_s^2 + se_m^2 \cdot \mu_s^2 + se_s^2 \cdot \mu_m^2} \quad (4)$$

Where  $se_a$ ,  $se_m$ , and  $se_s$  are the SE of the adjusted survey data point, the adjustment factor, and the survey data point, respectively.  $\mu_s$  and  $\mu_m$  are the means of the survey data point and the adjustment factor.

We present the predicted adjustment factors by age for inpatient utilisation rates with one-year recall (Figure S3), for inpatient coverage with one-year recall (Figure S4), and inpatient coverage with one-month recall (Figure S5). The adjustment factors for inpatient coverage with one-year recall were higher than inpatient utilisation with the same recall, because they adjust for both recall and reported measures.

**Figure S3. Global age-sex specific adjustment factors applied to surveys reporting one-year recall of inpatient utilisation rate**

Adjustment factors were estimated from cross-validated age-spline regressions where the dependent variable was the ratio of annual inpatient utilisation rates reported by reference data sources to survey data sources reporting one-year recall of inpatient utilisation rates, matched on age, sex, location, and year. Estimated adjustment factors are denoted by the blue lines along with their associated predictions intervals shaded in grey. Data points (ratios) in which the adjustment factors were estimated on are displayed as black circles.

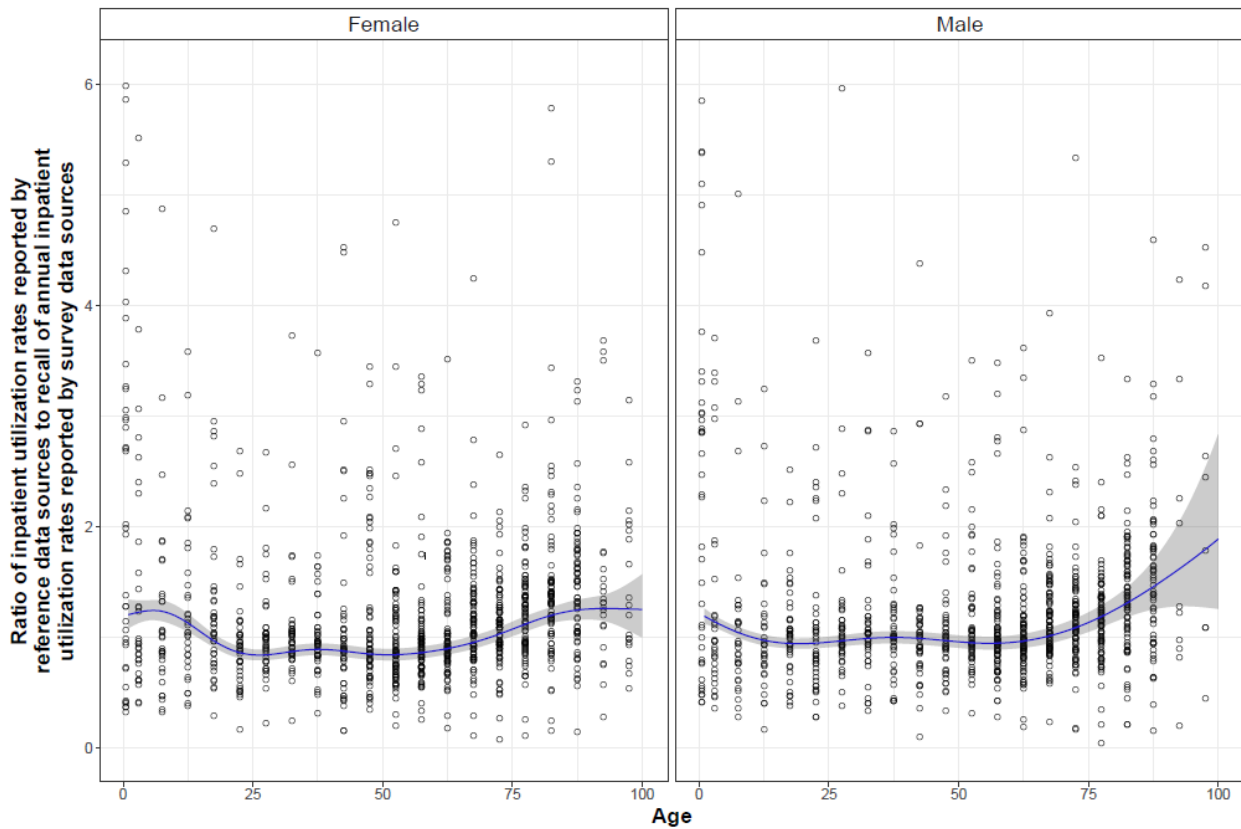



**Figure S4. Global age-sex specific adjustment factors applied to surveys reporting coverage of hospital admissions in the past year**

Adjustment factors were estimated from cross-validated age-spline regressions where the dependent variable was the ratio of annual inpatient utilisation rates reported by reference data sources to survey data sources reporting proportion of respondents admitted into hospital in the past year, matched on age, sex, location, and year. Estimated adjustment factors are denoted by the blue lines along with their associated predictions intervals shaded in grey. Data points (ratios) in which the adjustment factors were estimated on are displayed as black circles.

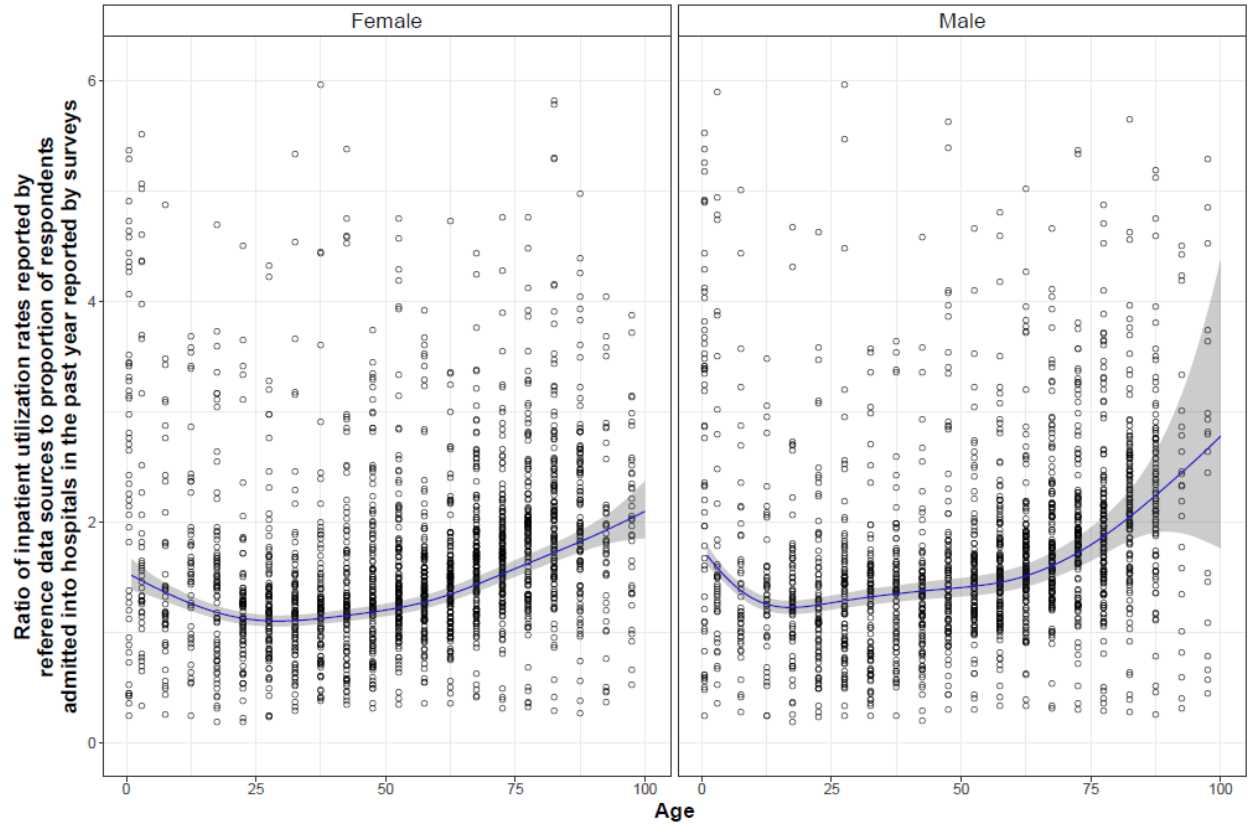

**Figure S5. Global age-sex specific adjustment factors applied to surveys reporting coverage of hospital admissions in the past month**

Adjustment factors were estimated from cross-validated age-spline regressions where the dependent variable was the ratio of annual inpatient utilisation rates reported by reference data sources to survey data sources reporting proportion of respondents admitted into hospital in the past month, matched on age, sex, location, and year. Estimated adjustment factors are denoted by the blue lines along with their associated predictions intervals shaded in grey. Data points (ratios) in which the adjustment factors were estimated on are displayed as black circles.

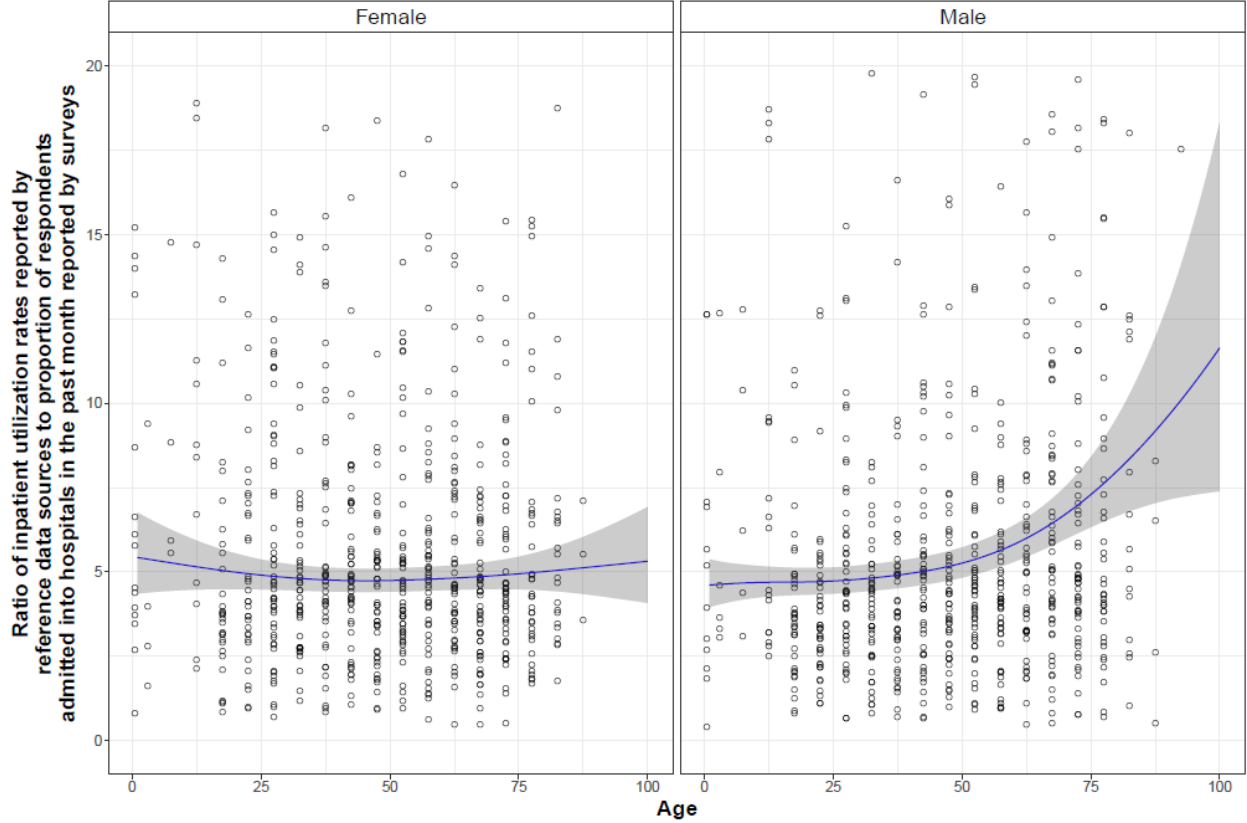

### 3.4.2. Outpatient data adjustments for data varying by age and sex

For outpatient coverage data with a one-year recall (Figure S6), we estimated adjustment factors using the reference data and penalised spline regression as described in Section 3.4.1 on inpatient data adjustments for data varying by age and sex above.

For outpatient data on coverage with shorter recall (i.e. two weeks, 30 days, and three months), we did not directly adjust these data to reference data. For each coverage recall period, we looked for overlap with a reliable utilisation data source on the basis of age, sex, location, and year. We adjusted the proportions with any use of service to number of visits per persons using surveys with similar recall periods. We ran sex specific penalised-spline regressions on all outpatient data with a recall of less than one year and used dichotomous covariates to denote surveys with a two-week and three-month recall as shown in equation (5):

$$\ln\left(\frac{\mu_{rate,i}}{\mu_{proportion,i}}\right) = \beta_0 + h(age_i) + \beta_1 x_{2week,i} + \beta_2 x_{3month,i} + \varepsilon_i \quad (5)$$

**Figure S6. Global age-sex specific adjustment factors applied to surveys reporting coverage of outpatient services in the past year**

Adjustment factors were estimated from cross-validated age-spline regressions where the dependent variable was the ratio of annual outpatient utilisation rates reported by reference data sources to survey data sources reporting proportions of respondents who used outpatient services in the past year, matched on age, sex, location, and year. Estimated adjustment factors are denoted by the blue lines along with their associated predictions intervals shaded in grey. Data points (ratios) in which the adjustment factors were estimated on are displayed as black circles.

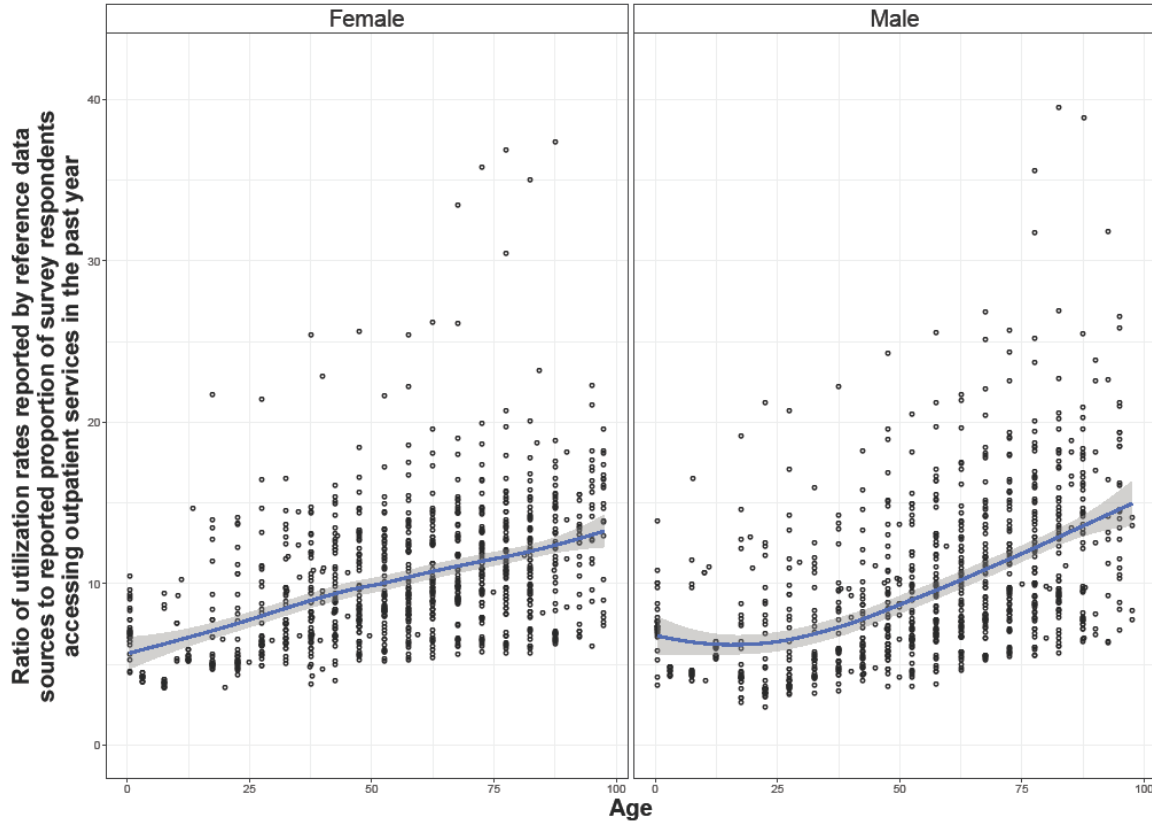

Where  $i$  denotes a given matched observation,  $h(\text{age}_i)$  represents a basis function that estimated a cross-validated penalised spline over the population weighted mean age of the age category,  $\mu_{rate}$  and  $\mu_{proportion}$  are the point estimates of survey data reporting utilisation rates and proportions respectively,  $x_{2week}$  and  $x_{3month}$  are dichotomous covariates denoting surveys with a two-week or three-month recall, and  $\varepsilon$  represents the residual. This adjustment assumed that surveys with a two-week and three-month recall systematically differed from surveys with 30-day recall, as estimated by  $\beta_1$  and  $\beta_2$  in equation (5). Exponentiated predictions from these regressions were multiplied by reported survey proportions and errors were propagated with equation (4). We display the predicted regressions fits (Figure S7). The adjusted data were treated as survey reported utilisation rates with a two week, 30-day, or three-month recall.

**Figure S7. Global age-sex specific adjustment factors applied to surveys reporting coverage of outpatient services in the past two weeks, 30 days, and three months**

Adjustment factors were estimated from cross-validated age-spline regressions where the dependent variable was the ratio of outpatient utilisation rates reported by surveys to proportion of people who used outpatient services reported by surveys in the past two weeks, 30 days, or three months, matched on recall period, age, sex, location, and year. Estimated adjustment factors are denoted by the blue lines along with their associated predictions intervals shaded in grey. Data points (ratios) in which the adjustment factors were estimated on are displayed as black circles.

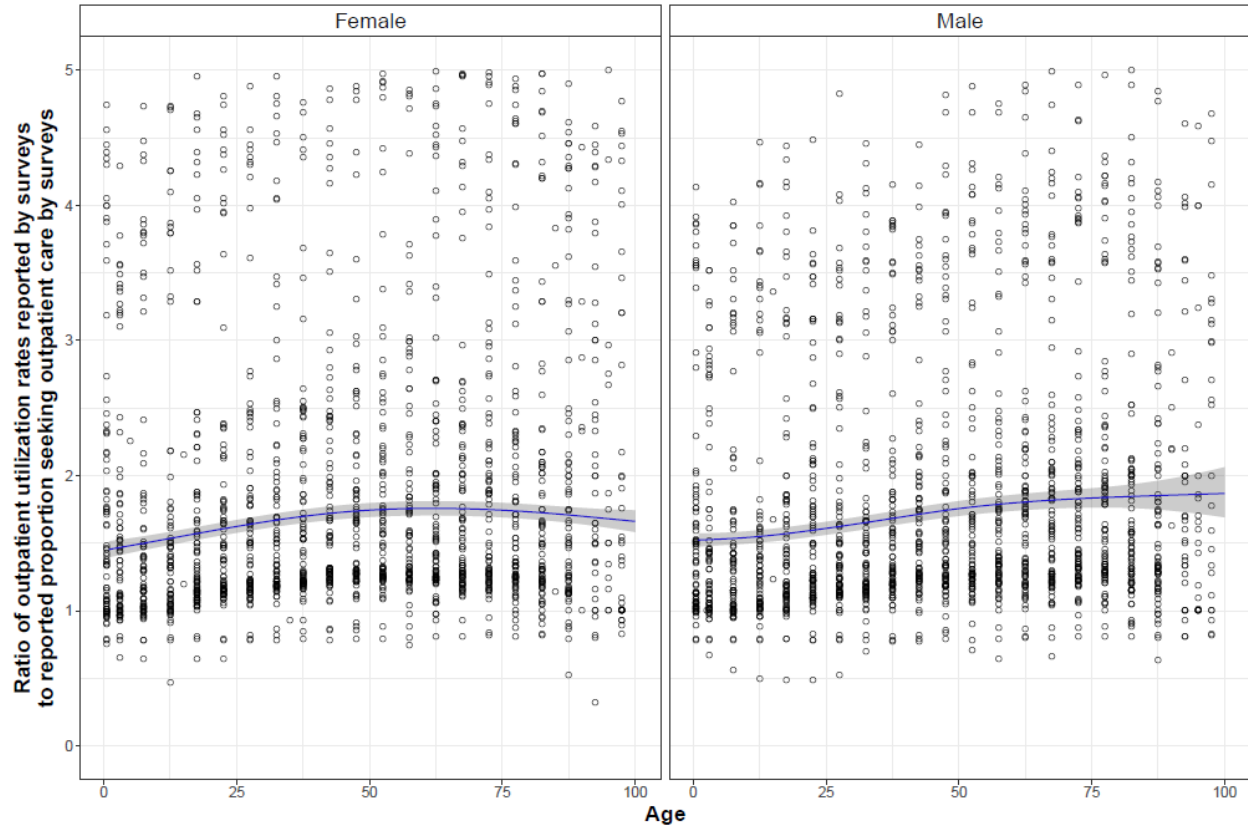

## Section 4. Estimating the utilisation models

### 4.1. Introduction

We applied a Bayesian hierarchical metaregression method referred to as DisMod-MR-2.1 to analyse the extracted data and estimate age-sex-year-location specific rates of utilisation.<sup>6,7</sup> DisMod-MR offers two key advantages over other multiple regression methods: 1) it incorporates priors from a geographic hierarchy to improve estimates in countries with little to no data, and 2) it leverages age splines to draw power from neighbouring age categories and estimates age-sex specific patterns. Data points from a few data sources (n=42) were outliered when they systematically differed from neighbouring data points.

### 4.2. Quantifying and adjusting for differences across data sources in DisMod-MR

When the survey data systematically and multiplicatively differed from reference data points, we adjusted the data using dichotomous covariates within DisMod-MR 2.1. For the outpatient utilisation model, we created four covariates for survey recall periods: two-week, 30-day, three-month recall, and one year (Table S9). We also created two covariates for special phrasing of the utilisation questions that: 1) did not distinguish outpatient and inpatient services, and 2) asked only about utilisation due to illness or injury. For the inpatient utilisation model, we created covariates for two survey series: 1) World Health Survey, and 2) WHO's Multi-country Survey Study on Health and Health System Responsiveness.

The exponentiated beta value of the coefficient was the adjustment applied to the survey data type across age and sex categories. For example, the result for surveys reporting two-week recall was 0.036 (95%UI 0.035-0.037), and meant that reported utilisation during a two-week time period would, on average, be adjusted by  $1/0.036$  or a factor 27.78 to represent annual utilisation. Final posterior estimates were made with dichotomous covariates assuming the value of zero.

### 4.3. Additional covariates and their definitions

The DisMod-MR models also included Socio-demographic Index (SDI) as a covariate for outpatient utilisation, and hospital beds per 1,000 population for inpatient utilisation. Utilisation of health services is positively, and statistically significantly related to income at the national level in global estimates,<sup>8</sup> and to education.<sup>9</sup> In global data at the country level however, income, education, and fertility were highly correlated, which creates multicollinearity when all three variables are included in regression analyses. SDI is a single variable that summarises the information, and produces stable regression estimates. In the estimate of utilisation of outpatient visits, the coefficient for SDI was statistically significant.

The GBD 2016 SDI was calculated from three variables: lag-distributed income, where income is Gross National Product per capita, educational attainment among people over 15 years of age, and total fertility rate.<sup>11</sup> Lag-distributed income is gross national product per capita in international dollars distributed over ten years, with larger weights for more recent years. Each variable was scaled from zero to one where zero represented the lowest observed value of lagged distributed income and education, and the highest observed value for total fertility rate for a country between 1990 to 2016; one represented the other end of the range. SDI was the geometric mean of the rescaled values.

Hospital beds per 1,000 population measured of the capacity associated with greater utilisation and resources. In the estimate of utilisation of inpatient admissions, its coefficient was statistically significant. The relationship between utilisation of inpatient admissions and SDI was less clear. Demand for inpatient care is less responsive (elastic) to income. Also, maternity care was a large share of inpatient admissions, meaning that admissions were positively related to the total fertility rate, instead of the negative relationship measured by SDI.

Hospital beds per 1,000 was based on World Development Indicator data.<sup>12</sup> To create a complete time-series of hospital beds per 1,000 for all locations, we used Spatiotemporal Gaussian Process Regression (ST-GPR) to interpolate data for missing locations and years. The ST-GPR is a data synthesis method widely used in GBD.<sup>13</sup> Briefly, ST-GPR is a three-step model. In the first step of the modeling process we run a linear regression with a set of explanatory variables to predict general trends in the data. In the second step, we smooth over the residuals

**Table S9. Estimated coefficients of the outpatient and inpatient utilisation model**

Study-level covariates denote global dichotomous covariates that adjusted corresponding data points.

| Model                         | Covariate name                                                                           | Covariate type | Beta value (95% UI)      | Exponentiated beta value (95% UI) |
|-------------------------------|------------------------------------------------------------------------------------------|----------------|--------------------------|-----------------------------------|
| <b>Outpatient utilisation</b> | Surveys reporting two-week recall                                                        | Study-level    | -3.32<br>(-3.34 — -3.31) | 0.036<br>(0.035 — 0.037)          |
|                               | Surveys reporting 30 day recall                                                          | Study-level    | -2.77<br>(-2.78 — -2.76) | 0.063<br>(0.062 — 0.063)          |
|                               | Surveys reporting three-month recall                                                     | Study-level    | -1.68<br>(-1.72 — -1.65) | 0.19<br>(0.18 — 0.19)             |
|                               | Surveys reporting one-year recall                                                        | Study-level    | -0.53<br>(-0.54 — -0.51) | 0.59<br>(0.58 — 0.60)             |
|                               | Survey reports utilisation measure only when person in household had a illness or injury | Study-level    | -0.15<br>(-0.16 — -0.14) | 0.86<br>(0.85 — 0.87)             |
|                               | Surveys reports utilisation measure without distinguishing outpatient or inpatient       | Study-level    | 0.081<br>(0.064 — 0.10)  | 1.08<br>(1.07 — 1.11)             |
|                               | Socio-demographic Index                                                                  | Country-level  | 0.83<br>(0.78 — 0.87)    | 2.28<br>(2.18 — 2.39)             |
| <b>Inpatient utilisation</b>  | World Health Survey                                                                      | Study-level    | 0.44<br>(0.39 — 0.48)    | 1.55<br>(1.48 — 1.61)             |
|                               | World Health Organization’s Multi-country Survey Study on Health and Responsiveness      | Study-level    | 0.49<br>(0.42 — 0.55)    | 1.63<br>(1.52 — 1.73)             |
|                               | log hospital beds per 1,000                                                              | Country-level  | 0.17<br>(0.16 — 0.19)    | 1.19<br>(1.17 — 1.20)             |

of the linear regression to account for variation across time and space. These smoothed residuals were subsequently added to the predictions of the linear regression estimated in the first step to create a spatiotemporal prediction. In the third step, we passed the spatiotemporal predictions as a prior to GPR’s mean function and an input into GPR’s covariance function.

#### 4.4. Age-sex splitting

When measures were reported in wide age intervals (e.g. all ages), we did age-splitting. DisMod-MR 2.1 is capable of conducting age-integration but its performance degrades while integrating across wide age categories. To remedy this issue, we ran a preliminary DisMod-MR 2.1 model with data that were disaggregated by age to estimate countries’ age-pattern and then we applied the estimated age-pattern to split aggregated all age data. This procedure was operationalised by calculating a constant,  $k$ , which was the ratio of the aggregated all age data point,  $\mu_{all\ age}$ , to the all age estimated utilisation rate from the DisMod-MR 2.1 model,  $\widehat{\mu}_d$ , as shown in equation (6):

$$k = \frac{\mu_{all\ age}}{\widehat{\mu}_d} \quad (6)$$

The constant,  $k$ , was then multiplied by age-specific utilisation rates from the DisMod-MR 2.1 model. The uncertainty from the data and the age-pattern were propagated following equation 4. The split data was then incorporated into final DisMod-MR 2.1 estimates.

#### 4.5. Raking DisMod-MR 2.1 estimates

DisMod-MR 2.1 produced accurate estimates in locations with little to no data through leveraging the geographical hierarchy (Table S4). This process is operationalised by first fitting a model at the global level on all available data. Estimates from the global model serve as Bayesian priors to super-region models estimated on data specific to the super-region. In turn, super-region models serve as priors to regional models, regional models serve as priors to national models, and, in nations with subnational estimates, national models serve as priors to subnational models. To generate final national level estimates in nations where subnational estimates exist, by default DisMod-MR 2.1

aggregates subnational estimates to the national level. This process may lead to inconsistencies between the final aggregated national level estimate and national administrative records, especially in nations where subnational data on utilisation do not exist.

To resolve this issue, we raked (scaled) subnational estimates to match the fitted national estimates. This is in contrast to aggregating subnational estimates to replace fitted national estimates. Raking only occurred in countries where we did not have subnational level data on utilisation. For our outpatient model, we raked estimates Japan, South Africa, Kenya, England, Saudi Arabia, United States, and Sweden. In our inpatient model we raked estimates in Japan, Kenya, England, Saudi Arabia, and Sweden. The lone exception to this rule was China. We also raked China estimates, because the national estimates based on several years of data indicated a strong time trend that disappeared when subnational estimates based on a single year of data were aggregated to the national level.

#### **4.6. Understanding the impact of missing data on DisMod-MR 2.1 estimates**

Although DisMod-MR produces estimates for locations with little to no data, the impact of this method was that country-level results were similar to the regional results for those locations. When no data were available for a country, the final estimate was based on the regional prior, and covariates. When data were available, the final estimate gave more weight to the country data than the regional prior, as well as the covariates.

An example of the impact is the decomposition analysis for sub-Saharan Africa, where results were more similar across countries than other super-regions. We had 91 country-years of outpatient data and 51 country-years of inpatient data for 55 countries. Results for countries with more data differed from the other countries in the region. For example, in the Southern Africa region, we had 32 country-years of outpatient data and three country-years of inpatient data from South Africa, one country-year of inpatient data Namibia, Swaziland, and Zimbabwe, and no data from Botswana and Lesotho. The South African estimates showed a substantial decrease in the outpatient utilisation rate, but not the other countries' estimates. Note that the final regional estimate differed from the regional prior (not shown), because it included the country-level South African results.

#### **4.7. Internal validity of results**

To examine the internal validity of the estimates we compared utilisation rates estimated with all available data to rates from reference data sources (Table S5). This internal validation exercise was limited to country-years that had both reference data and survey data. This validation process identified the problem with the subnational estimates in countries that did not have subnational utilisation data described in Section 4.5 above. Outpatient (Figure S8) and inpatient (Figure S9) utilisation per capita from the final DisMod 2.1 estimates with all data sources, including raked estimates for eight countries, by country-year, were compared to the reference the reference data. The comparison showed good agreement between the final estimated rates and the reference data.

#### **4.8. Age standardisation**

To facilitate comparisons across countries with different age structures in Figures 1 and 2, we estimated age-standardised utilisation rates. Age-standardisation was the process of applying age-specific rates for each location to a population with a constant global age structure and aggregating the estimate to a national level. We used the constant global age structure developed by the GBD 2013 collaborators, which reflected the percentage of the population in each age category based on the United Nations Population Division's World Population Prospects for all countries for the years 2010-2035.<sup>14</sup>

**Figure S8. Internal validation of outpatient utilisation rates reported by reference group compared to estimated outpatient utilisation rate**

Displayed utilisation rates were not age-standardised, because the comparison is between country-years.

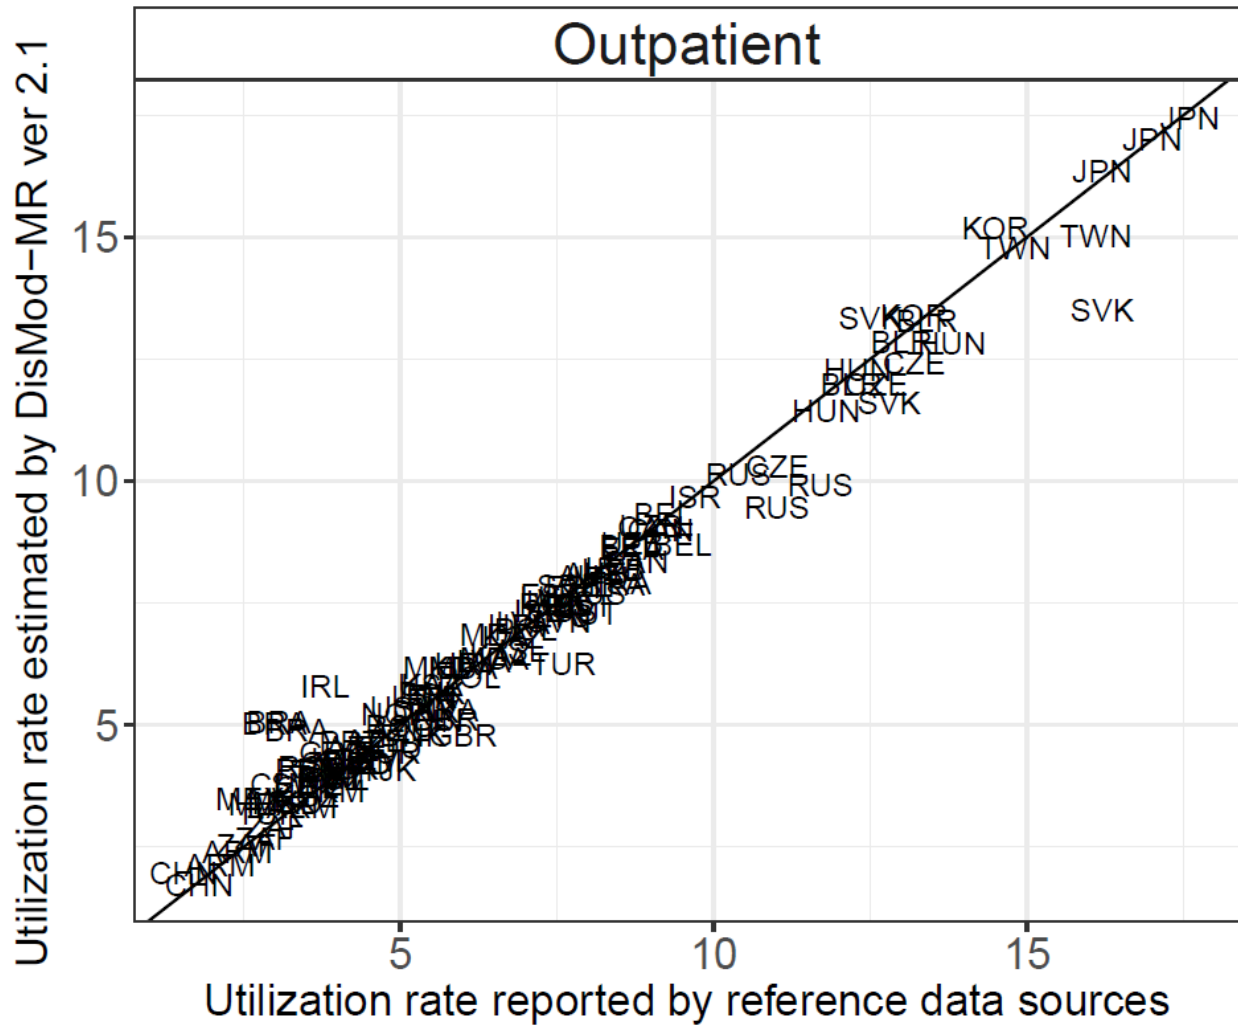



**Figure S9. Internal validation of inpatient utilisation rates reported by reference group compared to estimated inpatient utilisation rate.**

Displayed utilisation rates were not age-standardised, because the comparison is between country-years.

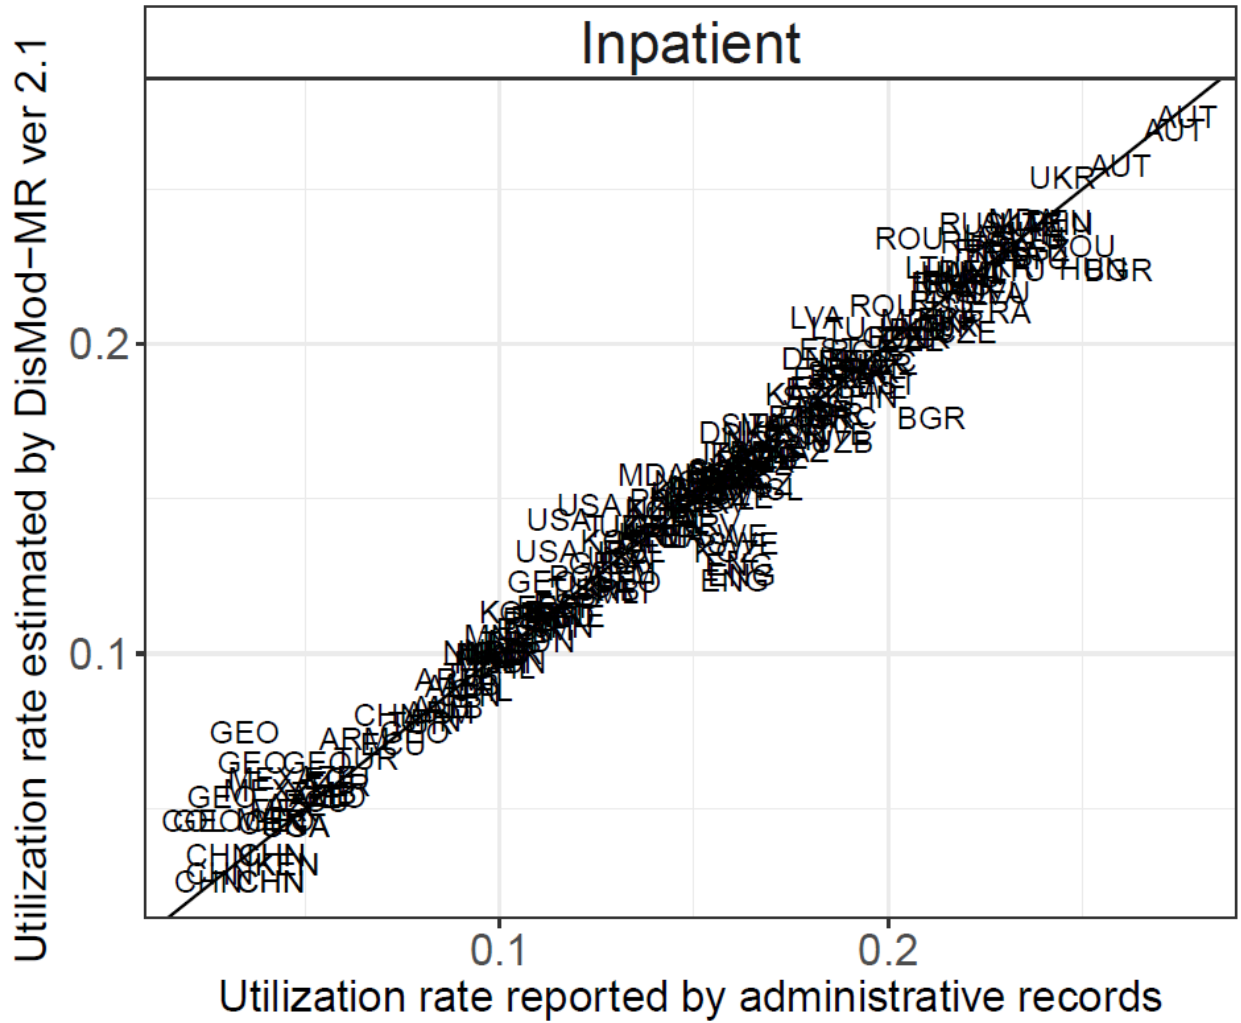

## **Section 5. Utilisation results**

### **5.1. Age and sex specific utilisation rates**

In all super-regions in 2016, outpatient utilisation rates increased with age beginning in early adulthood (Figure S10). The increase was steepest among men in South Asia, and less pronounced in Latin America and the Caribbean and in sub-Saharan Africa. Inpatient utilisation rates increased among women during reproductive age categories (10-54 years), and then increased with age among women and men in later adulthood (Figure S11). Utilisation rates were higher for women than men in reproductive age categories, and similar in younger and older age categories (Figure S12).

### **5.2. Country-specific utilisation rates from 1990-2016**

**Figure S10. Global and GBD super-region estimates of outpatient utilisation rate in 2016 by age and sex**

Bold lines represent the estimated mean number of outpatient visits per person from 1,000 draws, and the dashed lines in the same colour are the uncertainty intervals defined as the 2.5<sup>th</sup> and 97.5<sup>th</sup> percentile of draws. GBD= Global Burden of Disease

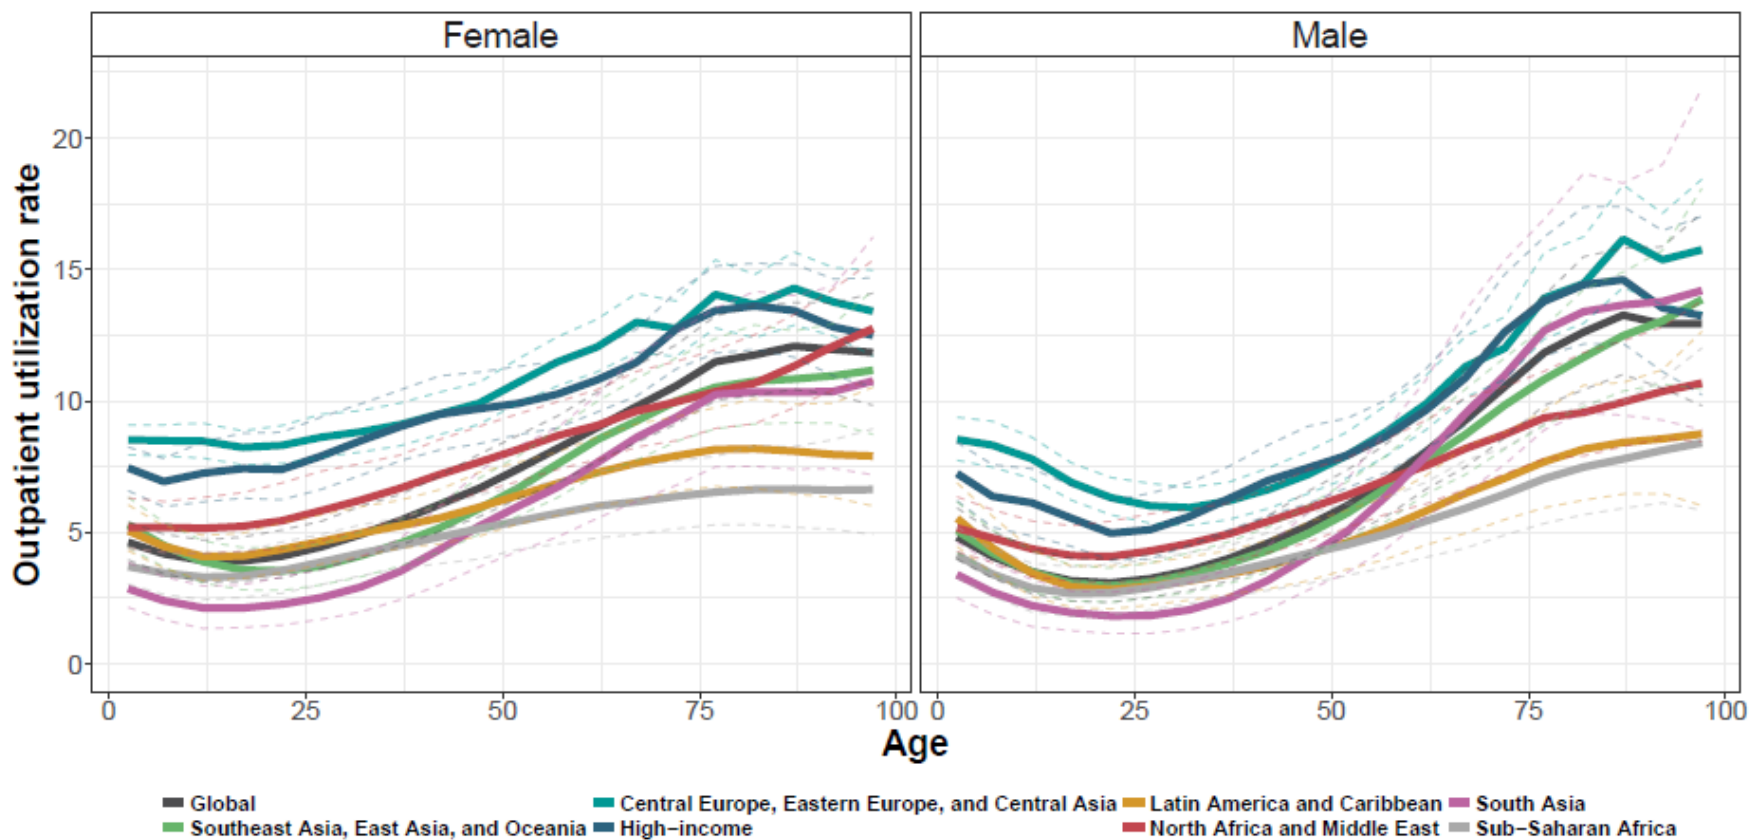

**Figure S11. Global and GBD super-region estimates of inpatient utilisation rate in 2016 by age and sex**

Bold lines represent the estimated mean number of inpatient admissions per person from 1,000 draws, and the dashed lines in the same colour are the uncertainty intervals defined as the 2.5<sup>th</sup> and 97.5<sup>th</sup> percentile of draws. GBD= Global Burden of Disease

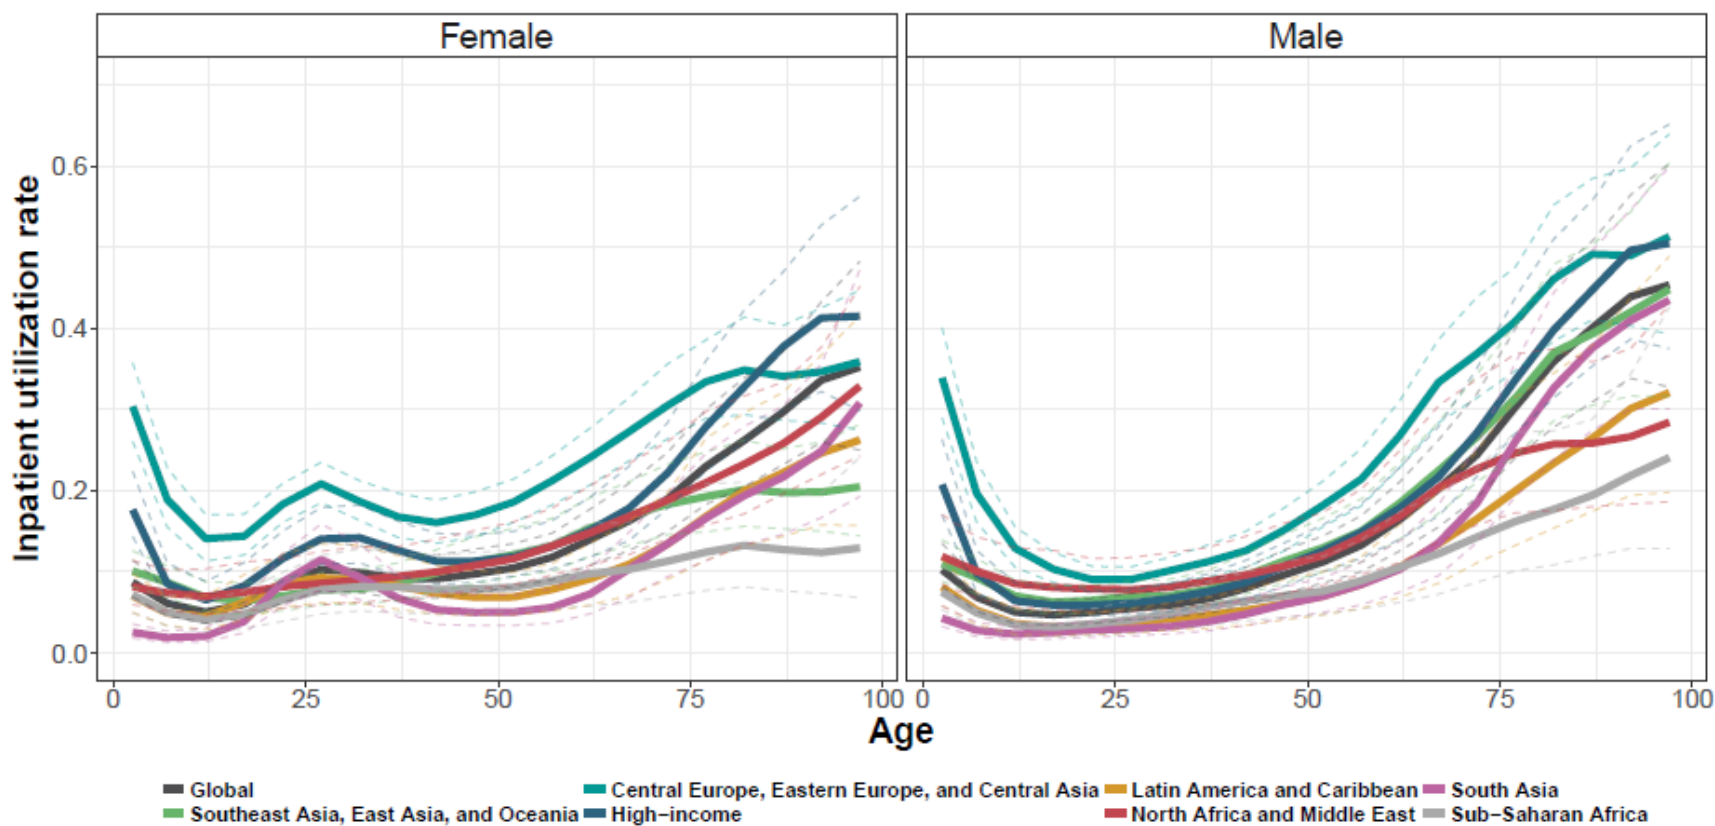

**Figure S12. Ratio of female to male global and GBD super-region estimates of outpatient and inpatient utilisation rate in 2016 by age**

Bold lines represent the estimated mean of the ratio of female utilisation rate to the male utilisation rate from 1,000 draws, and the dashed lines in the same colour are the uncertainty intervals defined as the 2.5<sup>th</sup> and 97.5<sup>th</sup> percentile of draws. The horizontal line at one shows where female and male utilisation rates would be the same. GBD= Global Burden of Disease

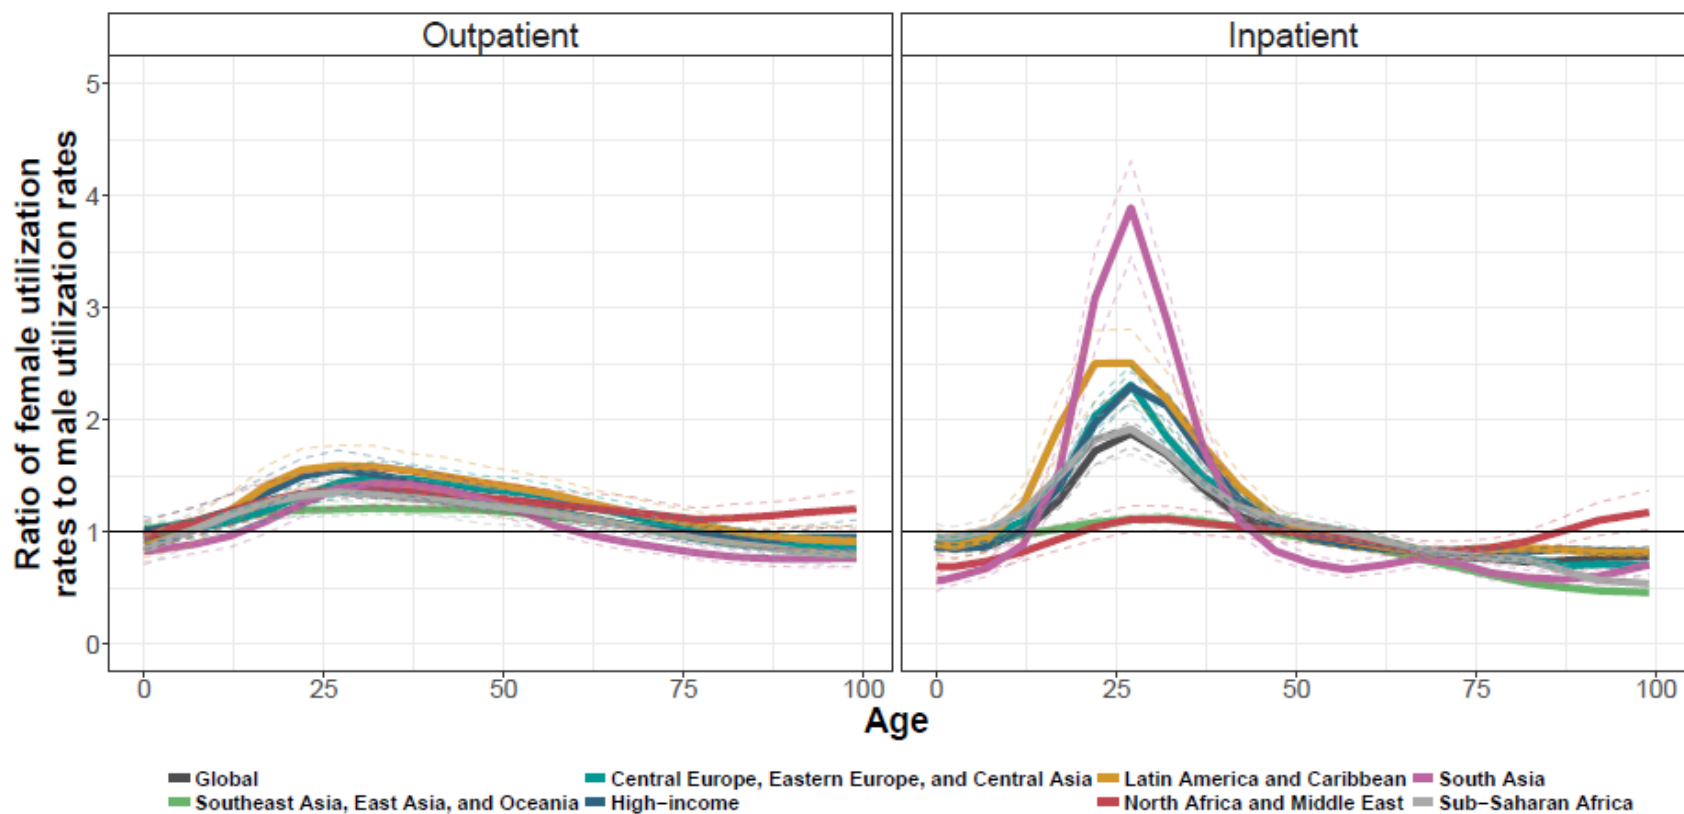

**Table S10. Global, GBD super-region, regional, and national age-standardised outpatient utilisation rates and annualised rate of change 1990 to 2016, and volume of outpatient visits in 2016 and percentage change in volume from 1990 to 2016, both sexes combined**

Table displays four sets of results: age-standardised outpatient utilisation rate per person defined as the number of outpatient visits per person per year, the annualised rate of change in the age-standardised outpatient utilisation rate, volume of outpatient visits in 2016, and the percentage change in volume from 1990 to 2016. For each result, the mean of 1,000 draws is reported, and in parenthesis the uncertainty interval defined as the 2.5<sup>th</sup> and 97.5<sup>th</sup> percentile of draws. GBD= Global Burden of Disease.

**Table S10: Global, GBD super-region, regional, and national age-standardised outpatient utilisation rates and annualised rate of change 1990 to 2016, and volume of outpatient visits in 2016 and percentage change in volume from 1990 to 2016, both sexes combined**

|                                                  | Age standardised for international comparisons            |                          |                         |                          |                          |                          | Estimates based on national age structure                      |                                                     |                                     |
|--------------------------------------------------|-----------------------------------------------------------|--------------------------|-------------------------|--------------------------|--------------------------|--------------------------|----------------------------------------------------------------|-----------------------------------------------------|-------------------------------------|
|                                                  | Age standardised outpatient utilisation rate (per capita) |                          |                         |                          |                          |                          | Annual rate of change in age-standardised rate (as percentage) | Volume of outpatient visits per year (in thousands) | Total percent age change (Figure 3) |
|                                                  | 1990                                                      | 1995                     | 2000                    | 2005                     | 2010                     | 2016 (Figure 1a)         |                                                                |                                                     |                                     |
| Global                                           | 5.06<br>(4.5 – 5.69)                                      | 4.6<br>(4.16 – 5.04)     | 4.58<br>(4.14 – 5.04)   | 4.7<br>(4.32 – 5.08)     | 4.8<br>(4.38 – 5.22)     | 5.42<br>(4.88 – 5.98)    | 0.26<br>(0.17 – 0.39)                                          | 39 349 571<br>(35 381 140 – 43 581 880)             | 58.65                               |
| Central Europe, Eastern Europe, and Central Asia | 7.85<br>(7.04 – 8.76)                                     | 7.16<br>(6.72 – 7.59)    | 7.64<br>(7.34 – 7.96)   | 8.13<br>(7.84 – 8.43)    | 8.06<br>(7.77 – 8.33)    | 8.74<br>(8.37 – 9.12)    | 0.41<br>(0.13 – 0.7)                                           | 3 754 868<br>(3 598 848 – 3 910 868)                | 15.81                               |
| Central Asia                                     | 6.76<br>(5.8 – 7.82)                                      | 5.98<br>(5.59 – 6.39)    | 6.2<br>(6.02 – 6.39)    | 6.49<br>(6.32 – 6.66)    | 6.65<br>(6.48 – 6.81)    | 6.84<br>(6.62 – 7.06)    | 0.04<br>(-0.42 – 0.56)                                         | 589 912<br>(570 621 – 610 569)                      | 31.18                               |
| Armenia                                          | 3.03<br>(2.56 – 3.48)                                     | 2.48<br>(2.34 – 2.63)    | 2.14<br>(2.09 – 2.19)   | 2.41<br>(2.34 – 2.49)    | 3.31<br>(3.25 – 3.38)    | 3.78<br>(3.66 – 3.9)     | 0.86<br>(0.35 – 1.43)                                          | 11 874<br>(11 480 – 12 250)                         | 12.95                               |
| Azerbaijan                                       | 5.24<br>(4.49 – 6.1)                                      | 5.49<br>(5.13 – 5.84)    | 5.07<br>(4.92 – 5.21)   | 4.81<br>(4.7 – 4.93)     | 4.65<br>(4.54 – 4.76)    | 4.7<br>(4.54 – 4.87)     | -0.42<br>(-0.96 – 0.16)                                        | 45 896<br>(44 265 – 47 685)                         | 26.85                               |
| Georgia                                          | 5.73<br>(4.88 – 6.86)                                     | 5.62<br>(4.79 – 6.49)    | 5.55<br>(4.75 – 6.47)   | 5.57<br>(4.76 – 6.59)    | 5.71<br>(4.96 – 6.72)    | 5.86<br>(5.05 – 6.96)    | 0.09<br>(-0.18 – 0.4)                                          | 24 457<br>(21 169 – 28 907)                         | -22.21                              |
| Kazakhstan                                       | 7.05<br>(6.06 – 8.22)                                     | 6.07<br>(5.66 – 6.46)    | 5.95<br>(5.78 – 6.11)   | 6.58<br>(6.41 – 6.73)    | 6.92<br>(6.77 – 7.09)    | 6.76<br>(6.54 – 6.99)    | -0.16<br>(-0.7 – 0.4)                                          | 119 225<br>(115 221 – 123 445)                      | 4.5                                 |
| Kyrgyzstan                                       | 4.53<br>(3.96 – 5.24)                                     | 5.15<br>(4.85 – 5.43)    | 4.57<br>(4.46 – 4.67)   | 4.11<br>(4.04 – 4.19)    | 3.72<br>(3.65 – 3.8)     | 3.63<br>(3.53 – 3.73)    | -0.85<br>(-1.38 to -0.38)                                      | 20 820<br>(20 236 – 21 441)                         | 9.78                                |
| Mongolia                                         | 4.98<br>(4.2 – 5.76)                                      | 5.17<br>(4.39 – 6.03)    | 5.32<br>(4.54 – 6.25)   | 5.34<br>(4.57 – 6.36)    | 5.41<br>(4.59 – 6.25)    | 5.51<br>(4.72 – 6.47)    | 0.4<br>(0.12 – 0.67)                                           | 16 220<br>(13 805 – 19 244)                         | 58.44                               |
| Tajikistan                                       | 4.88<br>(4.09 – 5.82)                                     | 3.92<br>(3.66 – 4.22)    | 4.33<br>(4.19 – 4.46)   | 4.41<br>(4.29 – 4.53)    | 4.38<br>(4.26 – 4.49)    | 4.8<br>(4.64 – 4.96)     | -0.06<br>(-0.69 – 0.55)                                        | 39 062<br>(37 635 – 40 584)                         | 62.02                               |
| Turkmenistan                                     | 4.09<br>(3.48 – 4.9)                                      | 4.19<br>(3.53 – 4.95)    | 4.51<br>(4.36 – 4.66)   | 4.15<br>(4.05 – 4.25)    | 3.83<br>(3.74 – 3.92)    | 3.68<br>(3.56 – 3.81)    | -0.4<br>(-1.06 – 0.19)                                         | 19 458<br>(18 739 – 20 162)                         | 38.04                               |
| Uzbekistan                                       | 9.76<br>(8.2 – 11.41)                                     | 7.88<br>(7.44 – 8.32)    | 8.71<br>(8.52 – 8.91)   | 9.27<br>(9.08 – 9.46)    | 9.53<br>(9.35 – 9.72)    | 9.99<br>(9.71 – 10.28)   | 0.09<br>(-0.45 – 0.71)                                         | 292 900<br>(284 110 – 301 880)                      | 54.12                               |
| Central Europe                                   | 7.65<br>(6.61 – 8.87)                                     | 6.78<br>(6.38 – 7.2)     | 7.03<br>(6.79 – 7.27)   | 7.42<br>(7.26 – 7.6)     | 7.48<br>(7.29 – 7.67)    | 7.52<br>(7.23 – 7.81)    | -0.06<br>(-0.52 – 0.43)                                        | 920 135<br>(886 691 – 952 737)                      | -3.01                               |
| Albania                                          | 4.79<br>(4.11 – 5.56)                                     | 4.9<br>(4.21 – 5.79)     | 4.46<br>(3.92 – 5.13)   | 4.25<br>(3.82 – 4.81)    | 5.3<br>(4.53 – 6.12)     | 5.44<br>(4.63 – 6.31)    | 0.48<br>(0.16 – 0.85)                                          | 16 081<br>(13 638 – 18 757)                         | 5.58                                |
| Bosnia and Herzegovina                           | 8.22<br>(7.08 – 9.63)                                     | 8.33<br>(7.09 – 9.56)    | 9.56<br>(8.38 – 10.83)  | 7.16<br>(6.28 – 8.52)    | 9.66<br>(8.42 – 11.32)   | 9.71<br>(8.54 – 11.43)   | 0.64<br>(0.23 – 0.99)                                          | 38 642<br>(34 174 – 45 107)                         | 5.26                                |
| Bulgaria                                         | 5.87<br>(5.07 – 7.16)                                     | 4.55<br>(4.19 – 4.97)    | 4.91<br>(4.59 – 5.23)   | 5.27<br>(4.91 – 5.62)    | 5.94<br>(5.7 – 6.17)     | 5.58<br>(5.23 – 5.92)    | -0.19<br>(-0.8 – 0.26)                                         | 43 761<br>(41 097 – 46 378)                         | -17.84                              |
| Croatia                                          | 6.81<br>(5.72 – 7.9)                                      | 6.77<br>(5.77 – 7.95)    | 6.8<br>(6.54 – 7.05)    | 6.71<br>(6.58 – 6.85)    | 5.85<br>(5.73 – 5.96)    | 6.01<br>(5.81 – 6.22)    | -0.48<br>(-1.04 – 0.14)                                        | 27 452<br>(26 523 – 28 425)                         | -17.38                              |
| Czech Republic                                   | 11.81<br>(10.12 – 13.36)                                  | 12.12<br>(11.55 – 12.7)  | 11.8<br>(11.52 – 12.07) | 12.06<br>(11.82 – 12.32) | 9.98<br>(9.65 – 10.3)    | 10.35<br>(9.9 – 10.86)   | -0.51<br>(-0.87 – 0.01)                                        | 114 798<br>(110 551 – 119 834)                      | -7.22                               |
| Hungary                                          | 12.36<br>(10.74 – 14.4)                                   | 10.41<br>(9.9 – 10.92)   | 11.09<br>(10.6 – 11.55) | 12.3<br>(12.06 – 12.54)  | 11.78<br>(11.54 – 12.03) | 11.94<br>(11.56 – 12.33) | -0.13<br>(-0.68 – 0.33)                                        | 125 899<br>(121 841 – 129 909)                      | -3.94                               |
| Macedonia                                        | 4.8<br>(4.09 – 5.56)                                      | 3.32<br>(3.11 – 3.57)    | 3.41<br>(3.33 – 3.49)   | 4.19<br>(4.05 – 4.34)    | 6.07<br>(5.91 – 6.23)    | 6.53<br>(6.27 – 6.79)    | 1.18<br>(0.67 – 1.68)                                          | 13 993<br>(13 415 – 14 569)                         | 48.25                               |
| Montenegro                                       | 7.36<br>(6.3 – 8.66)                                      | 7.33<br>(6.37 – 8.74)    | 7.34<br>(6.29 – 8.68)   | 7.48<br>(6.36 – 8.89)    | 7.59<br>(6.49 – 8.72)    | 6.98<br>(6.57 – 7.37)    | -0.2<br>(-0.73 – 0.25)                                         | 4556<br>(4305 – 4812)                               | 1.57                                |
| Poland                                           | 7.01<br>(5.89 – 8.31)                                     | 5.45<br>(5.18 – 5.72)    | 5.89<br>(5.79 – 6.01)   | 6.78<br>(6.64 – 6.91)    | 7.17<br>(7.02 – 7.31)    | 7.03<br>(6.77 – 7.3)     | 0.01<br>(-0.6 – 0.62)                                          | 285 941<br>(276 324 – 296 022)                      | 6.94                                |
| Romania                                          | 4.74<br>(4.04 – 5.79)                                     | 4.02<br>(3.79 – 4.27)    | 4.01<br>(3.9 – 4.12)    | 4.4<br>(4.32 – 4.49)     | 4.75<br>(4.66 – 4.85)    | 4.68<br>(4.48 – 4.87)    | -0.05<br>(-0.74 – 0.51)                                        | 96 637<br>(92 871 – 100 207)                        | -13.9                               |
| Serbia                                           | 8.06<br>(6.87 – 9.43)                                     | 8.12<br>(6.92 – 9.41)    | 7.96<br>(7.28 – 8.62)   | 7.46<br>(7.19 – 7.74)    | 7.28<br>(7.12 – 7.47)    | 7.3<br>(7.06 – 7.53)     | -0.38<br>(-0.93 – 0.21)                                        | 68 195<br>(65 925 – 70 283)                         | -11.48                              |
| Slovakia                                         | 13.24<br>(11.41 – 15.33)                                  | 12.75<br>(12.31 – 13.18) | 13.45<br>(13.0 – 13.84) | 13.08<br>(12.83 – 13.33) | 11.36<br>(11.0 – 11.73)  | 12.02<br>(11.61 – 12.42) | -0.37<br>(-0.9 – 0.18)                                         | 68 753<br>(66 438 – 70 949)                         | -1.36                               |
| Slovenia                                         | 7.52<br>(6.55 – 8.97)                                     | 7.4<br>(6.43 – 8.53)     | 7.55<br>(6.44 – 8.84)   | 7.44<br>(7.2 – 7.69)     | 6.82<br>(6.67 – 6.98)    | 7.0<br>(6.78 – 7.22)     | -0.27<br>(-0.94 – 0.22)                                        | 15 426<br>(14 964 – 15 875)                         | 1.28                                |
| Eastern Europe                                   | 8.38<br>(7.76 – 9.1)                                      | 7.87<br>(7.38 – 8.34)    | 8.58<br>(8.17 – 9.03)   | 9.24<br>(8.81 – 9.69)    | 9.01<br>(8.6 – 9.41)     | 10.29<br>(9.78 – 10.79)  | 0.79<br>(0.61 – 0.95)                                          | 2 244 820<br>(2 135 045 – 2 355 315)                | 21.75                               |
| Belarus                                          | 13.53<br>(12.05 – 15.31)                                  | 12.0<br>(11.41 – 12.67)  | 11.95<br>(11.7 – 12.19) | 12.76<br>(12.54 – 12.99) | 13.18<br>(12.94 – 13.39) | 12.66<br>(12.3 – 13.01)  | -0.26<br>(-0.68 – 0.15)                                        | 122 488<br>(119 061 – 125 736)                      | -11.25                              |
| Estonia                                          | 8.0<br>(7.01 – 9.35)                                      | 6.52<br>(6.2 – 6.9)      | 7.36<br>(7.18 – 7.56)   | 7.75<br>(7.6 – 7.9)      | 7.57<br>(7.42 – 7.72)    | 7.6<br>(7.38 – 7.82)     | -0.2<br>(-0.77 – 0.27)                                         | 10 320<br>(10 044 – 10 587)                         | -18.29                              |
| Latvia                                           | 6.77<br>(5.82 – 7.76)                                     | 4.91<br>(4.64 – 5.2)     | 5.35<br>(5.24 – 5.47)   | 6.3<br>(6.18 – 6.42)     | 7.0<br>(6.85 – 7.16)     | 7.02<br>(6.71 – 7.33)    | 0.14<br>(-0.33 – 0.62)                                         | 14 286<br>(13 705 – 14 868)                         | -20.56                              |
| Lithuania                                        | 8.31<br>(7.12 – 9.8)                                      | 7.13<br>(6.79 – 7.46)    | 7.2<br>(7.03 – 7.36)    | 7.88<br>(7.74 – 8.03)    | 7.96<br>(7.78 – 8.14)    | 9.29<br>(9.02 – 9.57)    | 0.43<br>(-0.19 – 0.98)                                         | 28 035<br>(27 254 – 28 859)                         | -8.99                               |

|                              |                             |                          |                          |                          |                          |                          |                               |                                       |        |
|------------------------------|-----------------------------|--------------------------|--------------------------|--------------------------|--------------------------|--------------------------|-------------------------------|---------------------------------------|--------|
| Moldova                      | 7-28<br>(6-16 – 8-38)       | 8-29<br>(7-85 – 8-74)    | 6-89<br>(6-74 – 7-03)    | 6-23<br>(6-12 – 6-34)    | 6-43<br>(6-3 – 6-55)     | 6-65<br>(6-44 – 6-86)    | -0-35<br>(-0-85 – 0-22)       | 26 964<br>(26 123 – 27 827)           | -14-66 |
| Russia                       | 8-88<br>(8-34 – 9-44)       | 8-1<br>(7-64 – 8-55)     | 9-61<br>(9-19 – 10-05)   | 10-23<br>(9-82 – 10-64)  | 9-81<br>(9-43 – 10-18)   | 11-61<br>(11-1 – 12-14)  | 1-03<br>(0-84 – 1-23)         | 1 755 031<br>(1 677 137 – 1 832 763)  | 35-28  |
| Ukraine                      | 6-09<br>(5-2 – 7-13)        | 6-57<br>(5-66 – 7-4)     | 5-29<br>(4-57 – 6-27)    | 6-07<br>(5-27 – 7-45)    | 6-17<br>(5-25 – 7-25)    | 6-19<br>(5-38 – 7-31)    | 0-07<br>(-0-17 – 0-33)        | 287 696<br>(250 635 – 342 033)        | -8-8   |
| High-income                  | 8-63<br>(7-53 – 9-78)       | 8-59<br>(7-68 – 9-5)     | 8-02<br>(7-3 – 8-78)     | 7-78<br>(7-18 – 8-41)    | 7-68<br>(7-09 – 8-26)    | 7-97<br>(7-26 – 8-8)     | -0-31<br>(-0-44 to -<br>0-11) | 9 167 921<br>(8 403 482 – 10 011 034) | 16-66  |
| Australasia                  | 8-53<br>(7-3 – 10-09)       | 11-16<br>(9-22 – 12-85)  | 7-31<br>(7-06 – 7-55)    | 7-59<br>(7-42 – 7-76)    | 7-62<br>(7-45 – 7-77)    | 8-22<br>(7-94 – 8-48)    | -0-14<br>(-0-73 – 0-43)       | 240 993<br>(233 044 – 248 421)        | 38-45  |
| Australia                    | 8-59<br>(7-32 – 10-21)      | 11-71<br>(9-56 – 13-51)  | 7-32<br>(7-14 – 7-51)    | 7-43<br>(7-28 – 7-58)    | 7-55<br>(7-4 – 7-68)     | 8-3<br>(8-05 – 8-54)     | -0-13<br>(-0-75 – 0-46)       | 204 734<br>(198 709 – 210 632)        | 39-97  |
| New Zealand                  | 8-23<br>(7-07 – 9-58)       | 8-46<br>(7-23 – 10-02)   | 7-25<br>(6-61 – 8-07)    | 8-38<br>(8-02 – 8-71)    | 7-99<br>(7-63 – 8-34)    | 7-77<br>(7-25 – 8-24)    | -0-22<br>(-0-68 – 0-23)       | 36 259<br>(33 862 – 38 389)           | 30-42  |
| High-income<br>Asia-Pacific  | 17-36<br>(15-18 –<br>19-61) | 17-41<br>(15-47 – 19-38) | 15-8<br>(14-0 – 17-8)    | 15-4<br>(13-97 – 16-89)  | 15-26<br>(13-82 – 16-53) | 15-46<br>(14-02 – 17-06) | -0-45<br>(-0-56 to -<br>0-28) | 2 960 975<br>(2 664 263 – 3 216 790)  | 0-67   |
| Brunei                       | 8-35<br>(7-36 – 9-86)       | 8-67<br>(7-48 – 10-24)   | 7-87<br>(7-46 – 8-32)    | 9-1<br>(7-86 – 11-17)    | 9-29<br>(8-13 – 11-07)   | 9-48<br>(8-1 – 11-64)    | 0-49<br>(0-12 – 0-76)         | 3972<br>(3392 – 4991)                 | 92-7   |
| Japan                        | 18-35<br>(16-03 –<br>20-71) | 18-33<br>(16-2 – 20-57)  | 16-92<br>(14-93 – 18-97) | 16-25<br>(14-33 – 18-36) | 15-42<br>(13-48 – 17-25) | 15-24<br>(13-26 – 17-47) | -0-71<br>(-0-84 to -<br>0-59) | 2 058 990<br>(1 785 566 – 2 288 948)  | -9-62  |
| Singapore                    | 12-88<br>(11-57 –<br>14-62) | 13-18<br>(11-27 – 14-77) | 13-62<br>(11-76 – 15-47) | 13-81<br>(12-0 – 15-72)  | 14-11<br>(11-93 – 16-51) | 14-36<br>(12-25 – 17-43) | 0-42<br>(-0-03 – 0-77)        | 57 248<br>(48 863 – 69 706)           | 64-39  |
| South Korea                  | 14-91<br>(12-92 –<br>16-98) | 15-33<br>(13-63 – 17-27) | 13-06<br>(11-72 – 15-35) | 13-56<br>(13-15 – 13-98) | 15-15<br>(14-79 – 15-48) | 16-27<br>(15-69 – 16-79) | 0-33<br>(-0-12 – 0-85)        | 840 765<br>(811 979 – 867 526)        | 34-24  |
| High-income<br>North America | 5-7<br>(4-98 – 6-58)        | 5-58<br>(4-89 – 6-43)    | 5-5<br>(4-85 – 6-23)     | 5-66<br>(5-03 – 6-37)    | 5-77<br>(5-14 – 6-49)    | 5-94<br>(5-25 – 6-71)    | 0-16<br>(-0-03 – 0-31)        | 2 306 572<br>(2 043 005 – 2 587 508)  | 43-11  |
| Canada                       | 9-41<br>(8-24 – 10-75)      | 9-66<br>(8-26 – 11-18)   | 8-25<br>(7-84 – 8-62)    | 8-7<br>(8-5 – 8-9)       | 8-53<br>(8-33 – 8-73)    | 8-6<br>(8-2 – 9-0)       | -0-35<br>(-0-78 – 0-09)       | 337 164<br>(320 288 – 352 540)        | 29-39  |
| Greenland                    | 6-98<br>(6-02 – 8-05)       | 6-96<br>(5-87 – 8-21)    | 6-96<br>(6-02 – 8-21)    | 7-1<br>(6-16 – 8-31)     | 7-19<br>(6-19 – 8-32)    | 7-22<br>(6-26 – 8-45)    | 0-13<br>(-0-18 – 0-39)        | 361<br>(313 – 425)                    | 10-41  |
| United States                | 5-3<br>(4-59 – 6-13)        | 5-13<br>(4-5 – 5-89)     | 5-21<br>(4-53 – 5-99)    | 5-33<br>(4-66 – 6-12)    | 5-48<br>(4-77 – 6-27)    | 5-65<br>(4-94 – 6-49)    | 0-25<br>(0-06 – 0-39)         | 1 968 253<br>(1 712 250 – 2 237 653)  | 45-78  |
| Southern Latin<br>America    | 4-31<br>(3-81 – 4-79)       | 4-37<br>(3-92 – 4-85)    | 4-13<br>(3-72 – 4-56)    | 3-71<br>(3-5 – 3-94)     | 3-82<br>(3-61 – 4-08)    | 4-38<br>(3-93 – 4-95)    | 0-06<br>(-0-17 – 0-27)        | 287 249<br>(257 292 – 324 392)        | 38-8   |
| Argentina                    | 4-08<br>(3-47 – 4-73)       | 4-19<br>(3-61 – 4-82)    | 4-19<br>(3-66 – 4-77)    | 3-59<br>(3-34 – 3-91)    | 3-71<br>(3-46 – 4-05)    | 4-52<br>(3-89 – 5-31)    | 0-39<br>(0-05 – 0-7)          | 197 665<br>(170 214 – 232 432)        | 50-58  |
| Chile                        | 4-9<br>(4-67 – 5-14)        | 4-86<br>(4-72 – 4-99)    | 3-92<br>(3-8 – 4-04)     | 3-84<br>(3-76 – 3-91)    | 3-93<br>(3-83 – 4-04)    | 4-0<br>(3-91 – 4-09)     | -0-78<br>(-0-92 to -<br>0-63) | 73 361<br>(71 809 – 75 050)           | 17-33  |
| Uruguay                      | 4-23<br>(3-61 – 4-81)       | 4-28<br>(3-62 – 4-99)    | 4-41<br>(3-84 – 5-06)    | 4-44<br>(3-8 – 5-22)     | 4-51<br>(3-86 – 5-23)    | 4-61<br>(3-99 – 5-36)    | 0-33<br>(0-03 – 0-61)         | 16 209<br>(14 128 – 18 753)           | 23-24  |
| Western Europe               | 7-42<br>(6-41 – 8-58)       | 7-4<br>(6-74 – 8-02)     | 7-21<br>(6-7 – 7-73)     | 6-9<br>(6-49 – 7-37)     | 6-75<br>(6-36 – 7-19)    | 7-33<br>(6-68 – 8-12)    | -0-04<br>(-0-26 – 0-22)       | 3 372 132<br>(3 117 281 – 3 663 638)  | 15-3   |
| Andorra                      | 6-87<br>(6-02 – 8-01)       | 7-04<br>(6-07 – 8-16)    | 7-01<br>(5-96 – 8-36)    | 7-1<br>(6-06 – 8-46)     | 7-11<br>(6-08 – 8-43)    | 7-07<br>(6-18 – 8-11)    | 0-11<br>(-0-26 – 0-44)        | 603<br>(528 – 690)                    | 70-83  |
| Austria                      | 8-07<br>(6-92 – 9-36)       | 6-44<br>(6-1 – 6-81)     | 6-96<br>(6-79 – 7-12)    | 7-58<br>(7-44 – 7-74)    | 7-54<br>(7-39 – 7-69)    | 7-51<br>(7-26 – 7-78)    | -0-27<br>(-0-78 – 0-29)       | 71 220<br>(69 125 – 73 423)           | 11-77  |
| Belgium                      | 9-1<br>(7-86 – 10-6)        | 7-56<br>(7-21 – 7-91)    | 8-32<br>(8-14 – 8-49)    | 8-76<br>(8-58 – 8-92)    | 8-04<br>(7-78 – 8-32)    | 9-43<br>(8-47 – 10-74)   | 0-13<br>(-0-24 – 0-47)        | 112 672<br>(103 231 – 124 882)        | 19-96  |
| Cyprus                       | 5-11<br>(4-44 – 5-91)       | 5-21<br>(4-44 – 6-27)    | 5-2<br>(4-54 – 6-02)     | 5-56<br>(4-74 – 6-45)    | 5-55<br>(4-78 – 6-44)    | 5-61<br>(4-75 – 6-47)    | 0-36<br>(0-07 – 0-72)         | 5292<br>(4516 – 6084)                 | 54-96  |
| Denmark                      | 5-47<br>(4-63 – 6-43)       | 4-18<br>(3-98 – 4-38)    | 4-61<br>(4-52 – 4-71)    | 5-02<br>(4-93 – 5-12)    | 5-27<br>(5-18 – 5-36)    | 5-24<br>(5-11 – 5-36)    | -0-16<br>(-0-75 – 0-44)       | 32 599<br>(31 861 – 33 332)           | 11-49  |
| Finland                      | 5-52<br>(4-78 – 6-44)       | 4-22<br>(4-0 – 4-43)     | 4-93<br>(4-81 – 5-05)    | 5-23<br>(5-12 – 5-33)    | 5-17<br>(5-07 – 5-26)    | 4-97<br>(4-8 – 5-14)     | -0-4<br>(-0-93 – 0-11)        | 29 798<br>(28 798 – 30 750)           | 5-41   |
| France                       | 8-16<br>(6-97 – 9-74)       | 6-54<br>(6-23 – 6-87)    | 7-58<br>(7-39 – 7-78)    | 8-19<br>(8-04 – 8-33)    | 7-36<br>(7-2 – 7-52)     | 7-53<br>(7-28 – 7-79)    | -0-31<br>(-0-96 – 0-26)       | 528 113<br>(513 364 – 543 914)        | 11-17  |
| Germany                      | 9-14<br>(7-83 – 10-52)      | 10-72<br>(9-67 – 11-39)  | 9-8<br>(8-93 – 10-46)    | 8-04<br>(7-2 – 8-95)     | 7-78<br>(7-28 – 8-41)    | 9-68<br>(8-6 – 10-96)    | 0-22<br>(-0-09 – 0-54)        | 850 500<br>(773 673 – 936 425)        | 12-34  |
| Greece                       | 4-49<br>(3-86 – 5-33)       | 4-07<br>(3-83 – 4-3)     | 3-96<br>(3-88 – 4-05)    | 4-05<br>(3-92 – 4-18)    | 4-39<br>(3-99 – 4-83)    | 4-82<br>(4-08 – 5-83)    | 0-27<br>(-0-03 – 0-59)        | 56 668<br>(48 650 – 66 797)           | 20-95  |
| Iceland                      | 7-57<br>(6-47 – 9-09)       | 5-4<br>(5-1 – 5-79)      | 6-47<br>(6-28 – 6-65)    | 7-32<br>(7-17 – 7-48)    | 7-14<br>(6-98 – 7-3)     | 6-86<br>(6-62 – 7-1)     | -0-38<br>(-1-01 – 0-13)       | 2365<br>(2283 – 2447)                 | 22-78  |
| Ireland                      | 6-56<br>(5-51 – 7-67)       | 6-71<br>(5-79 – 7-8)     | 6-07<br>(5-39 – 7-17)    | 5-16<br>(4-87 – 5-47)    | 5-63<br>(5-38 – 5-85)    | 9-02<br>(8-48 – 9-51)    | 1-22<br>(0-67 – 1-72)         | 43 470<br>(40 961 – 45 746)           | 87-83  |
| Israel                       | 8-77<br>(7-52 – 10-29)      | 8-91<br>(7-63 – 10-12)   | 9-77<br>(9-19 – 10-3)    | 9-23<br>(8-27 – 10-34)   | 7-37<br>(6-91 – 7-88)    | 8-52<br>(7-43 – 9-96)    | -0-11<br>(-0-59 – 0-29)       | 70 402<br>(61 775 – 81 819)           | 81-02  |
| Italy                        | 8-87<br>(7-63 – 10-15)      | 9-02<br>(7-82 – 10-15)   | 8-11<br>(7-16 – 9-27)    | 8-6<br>(7-8 – 9-58)      | 9-06<br>(8-13 – 10-09)   | 8-94<br>(7-95 – 10-44)   | 0-03<br>(-0-3 – 0-34)         | 585 977<br>(529 305 – 662 681)        | 12-35  |
| Luxembourg                   | 8-02<br>(6-95 – 9-19)       | 8-04<br>(6-94 – 9-16)    | 8-12<br>(7-52 – 8-66)    | 7-2<br>(7-01 – 7-38)     | 7-24<br>(7-1 – 7-39)     | 7-31<br>(7-07 – 7-55)    | -0-36<br>(-0-82 – 0-16)       | 4481<br>(4338 – 4628)                 | 42-13  |
| Malta                        | 11-93<br>(10-27 –<br>14-09) | 12-12<br>(10-49 – 13-75) | 11-93<br>(10-83 – 13-28) | 12-59<br>(10-86 – 14-58) | 12-57<br>(10-76 – 14-53) | 12-86<br>(11-08 – 14-77) | 0-29<br>(-0-11 – 0-61)        | 5790<br>(4934 – 6641)                 | 35-91  |
| Netherlands                  | 5-36<br>(4-6 – 6-5)         | 5-47<br>(4-64 – 6-4)     | 5-12<br>(4-8 – 5-43)     | 4-77<br>(4-58 – 4-97)    | 4-85<br>(4-64 – 5-06)    | 5-06<br>(4-64 – 5-58)    | -0-22<br>(-0-69 – 0-19)       | 92 091<br>(85 339 – 99 650)           | 12-69  |
| Norway                       | 5-24<br>(4-37 – 6-24)       | 5-34<br>(4-58 – 6-34)    | 5-4<br>(4-61 – 6-42)     | 4-44<br>(4-28 – 4-6)     | 4-9<br>(4-8 – 5-01)      | 4-91<br>(4-75 – 5-08)    | -0-25<br>(-0-85 – 0-38)       | 27 348<br>(26 448 – 28 256)           | 18-77  |
| Portugal                     | 4-27<br>(3-66 – 5-04)       | 3-33<br>(3-13 – 3-52)    | 3-79<br>(3-62 – 3-98)    | 3-64<br>(3-57 – 3-72)    | 4-22<br>(4-08 – 4-35)    | 4-85<br>(4-45 – 5-2)     | 0-49<br>(0-03 – 0-92)         | 57 470<br>(52 897 – 61 515)           | 31     |



|                                  |                       |                       |                       |                       |                       |                         |                               |                                      |        |
|----------------------------------|-----------------------|-----------------------|-----------------------|-----------------------|-----------------------|-------------------------|-------------------------------|--------------------------------------|--------|
| Spain                            | 7-99<br>(6-89 – 9-2)  | 8-09<br>(6-95 – 9-37) | 8-23<br>(7-52 – 8-92) | 6-98<br>(6-59 – 7-39) | 6-7<br>(6-3 – 7-14)   | 7-61<br>(6-65 – 8-68)   | -0-19<br>(-0-55 – 0-17)       | 364 830<br>(326 079 – 410 417)       | 14-48  |
| Sweden                           | 4-6<br>(4-0 – 5-33)   | 4-64<br>(3-99 – 5-41) | 3-94<br>(3-4 – 4-62)  | 3-57<br>(3-06 – 4-08) | 3-96<br>(3-32 – 4-64) | 3-96<br>(3-36 – 4-69)   | -0-58<br>(-0-83 to -<br>0-29) | 41 650<br>(35 544 – 48 616)          | 0-18   |
| Switzerland                      | 5-56<br>(4-74 – 6-58) | 5-58<br>(4-77 – 6-42) | 4-47<br>(4-16 – 4-91) | 4-7<br>(4-5 – 4-88)   | 5-09<br>(4-87 – 5-29) | 5-3<br>(4-93 – 5-69)    | -0-18<br>(-0-65 – 0-3)        | 48 220<br>(45 373 – 51 332)          | 24-67  |
| United Kingdom                   | 4-8<br>(4-17 – 5-57)  | 4-83<br>(4-18 – 5-61) | 4-58<br>(3-96 – 5-29) | 4-9<br>(4-24 – 5-69)  | 4-89<br>(4-22 – 5-69) | 4-85<br>(4-2 – 5-62)    | 0-04<br>(-0-0 – 0-1)          | 337 223<br>(292 471 – 384 746)       | 18-99  |
| Latin America and Caribbean      | 4-76<br>(4-17 – 5-47) | 4-71<br>(4-14 – 5-37) | 4-68<br>(4-18 – 5-17) | 4-69<br>(4-25 – 5-13) | 4-63<br>(4-25 – 5-02) | 4-84<br>(4-34 – 5-37)   | 0-06<br>(-0-11 – 0-22)        | 2 716 242<br>(2 434 008 – 3 032 214) | 52-6   |
| Andean Latin America             | 4-81<br>(4-35 – 5-3)  | 4-51<br>(4-14 – 4-91) | 4-5<br>(4-17 – 4-83)  | 5-31<br>(4-96 – 5-71) | 5-92<br>(5-55 – 6-29) | 5-88<br>(5-04 – 7-12)   | 0-78<br>(0-44 – 1-21)         | 341 584<br>(290 621 – 416 754)       | 96-56  |
| Bolivia                          | 3-96<br>(3-67 – 4-27) | 3-98<br>(3-72 – 4-24) | 3-99<br>(3-76 – 4-22) | 4-36<br>(4-14 – 4-58) | 4-8<br>(4-35 – 5-29)  | 5-57<br>(4-75 – 6-81)   | 1-31<br>(0-82 – 2-0)          | 59 337<br>(49 875 – 73 913)          | 139-69 |
| Ecuador                          | 5-26<br>(4-46 – 6-23) | 5-37<br>(4-53 – 6-39) | 5-51<br>(4-7 – 6-44)  | 5-6<br>(4-7 – 6-81)   | 5-76<br>(4-9 – 6-72)  | 5-91<br>(5-0 – 7-02)    | 0-45<br>(0-03 – 0-83)         | 95 235<br>(79 805 – 114 457)         | 85-82  |
| Peru                             | 4-85<br>(4-42 – 5-31) | 4-27<br>(3-99 – 4-54) | 4-18<br>(4-0 – 4-37)  | 5-5<br>(5-31 – 5-7)   | 6-39<br>(6-2 – 6-58)  | 5-97<br>(5-11 – 7-28)   | 0-8<br>(0-37 – 1-35)          | 187 011<br>(159 602 – 230 504)       | 91-27  |
| Caribbean                        | 3-09<br>(2-67 – 3-54) | 3-14<br>(2-72 – 3-58) | 3-2<br>(2-77 – 3-64)  | 3-26<br>(2-82 – 3-74) | 3-3<br>(2-84 – 3-78)  | 3-37<br>(2-89 – 3-88)   | 0-33<br>(0-22 – 0-42)         | 152 895<br>(131 201 – 175 715)       | 53-13  |
| Antigua and Barbuda              | 3-49<br>(2-98 – 4-05) | 3-55<br>(3-02 – 4-1)  | 3-63<br>(3-1 – 4-22)  | 3-64<br>(3-14 – 4-24) | 3-73<br>(3-17 – 4-34) | 3-78<br>(3-22 – 4-38)   | 0-31<br>(0-08 – 0-54)         | 338<br>(285 – 394)                   | 71-67  |
| The Bahamas                      | 4-29<br>(3-62 – 5-02) | 4-29<br>(3-65 – 5-01) | 4-09<br>(3-73 – 4-46) | 4-46<br>(3-78 – 5-17) | 4-48<br>(3-8 – 5-2)   | 4-49<br>(3-83 – 5-26)   | 0-18<br>(-0-05 – 0-38)        | 1775<br>(1509 – 2075)                | 87-05  |
| Barbados                         | 2-14<br>(1-82 – 2-44) | 2-17<br>(1-85 – 2-5)  | 2-2<br>(1-92 – 2-49)  | 2-23<br>(1-9 – 2-57)  | 2-24<br>(1-9 – 2-6)   | 2-26<br>(1-93 – 2-61)   | 0-21<br>(0-01 – 0-42)         | 706<br>(602 – 813)                   | 32-71  |
| Belize                           | 2-87<br>(2-43 – 3-36) | 3-05<br>(2-6 – 3-52)  | 3-13<br>(2-66 – 3-64) | 3-2<br>(2-73 – 3-71)  | 3-25<br>(2-78 – 3-8)  | 3-33<br>(2-84 – 3-84)   | 0-57<br>(0-35 – 0-79)         | 1089<br>(915 – 1284)                 | 125-02 |
| Bermuda                          | 3-63<br>(3-1 – 4-19)  | 3-69<br>(3-14 – 4-24) | 3-74<br>(3-2 – 4-36)  | 3-81<br>(3-23 – 4-4)  | 3-86<br>(3-3 – 4-46)  | 3-91<br>(3-34 – 4-53)   | 0-28<br>(0-09 – 0-49)         | 270<br>(230 – 315)                   | 55-22  |
| Cuba                             | 2-94<br>(2-51 – 3-38) | 2-96<br>(2-55 – 3-41) | 2-98<br>(2-59 – 3-4)  | 3-05<br>(2-61 – 3-51) | 3-08<br>(2-61 – 3-57) | 3-17<br>(2-7 – 3-65)    | 0-29<br>(0-08 – 0-52)         | 40 426<br>(34 600 – 46 347)          | 36-97  |
| Dominica                         | 5-06<br>(4-31 – 5-91) | 5-22<br>(4-42 – 6-15) | 5-26<br>(4-54 – 6-12) | 5-45<br>(4-63 – 6-43) | 5-57<br>(4-73 – 6-52) | 5-64<br>(4-79 – 6-54)   | 0-41<br>(0-22 – 0-6)          | 412<br>(348 – 481)                   | 30-46  |
| Dominican Republic               | 3-06<br>(2-6 – 3-57)  | 3-13<br>(2-66 – 3-59) | 3-23<br>(2-73 – 3-74) | 3-31<br>(2-83 – 3-81) | 3-4<br>(2-89 – 3-96)  | 3-52<br>(3-02 – 4-08)   | 0-55<br>(0-34 – 0-78)         | 34 633<br>(29 530 – 40 524)          | 84-98  |
| Grenada                          | 3-0<br>(2-53 – 3-48)  | 3-12<br>(2-67 – 3-59) | 3-23<br>(2-77 – 3-73) | 3-36<br>(2-88 – 3-85) | 3-45<br>(2-94 – 3-99) | 3-54<br>(3-03 – 4-13)   | 0-64<br>(0-44 – 0-86)         | 351<br>(299 – 412)                   | 29-94  |
| Guyana                           | 4-32<br>(3-9 – 4-77)  | 4-38<br>(3-93 – 4-82) | 4-82<br>(4-13 – 5-6)  | 4-84<br>(4-13 – 5-67) | 4-95<br>(4-22 – 5-78) | 5-11<br>(4-36 – 5-91)   | 0-64<br>(0-33 – 0-99)         | 3611<br>(3009 – 4203)                | 29-19  |
| Haiti                            | 2-45<br>(2-09 – 2-83) | 2-52<br>(2-14 – 2-89) | 2-55<br>(2-19 – 2-92) | 2-6<br>(2-23 – 3-01)  | 2-68<br>(2-28 – 3-08) | 2-75<br>(2-34 – 3-16)   | 0-45<br>(0-24 – 0-64)         | 27 119<br>(22 792 – 31 526)          | 77-69  |
| Jamaica                          | 1-8<br>(1-69 – 1-9)   | 1-72<br>(1-64 – 1-8)  | 1-87<br>(1-75 – 2-0)  | 2-09<br>(1-78 – 2-4)  | 2-12<br>(1-79 – 2-43) | 2-14<br>(1-83 – 2-47)   | 0-67<br>(0-16 – 1-11)         | 6026<br>(5154 – 6945)                | 52-07  |
| Puerto Rico                      | 5-22<br>(4-46 – 6-08) | 5-37<br>(4-57 – 6-23) | 5-49<br>(4-66 – 6-41) | 5-59<br>(4-87 – 6-41) | 5-67<br>(4-9 – 6-52)  | 5-68<br>(4-84 – 6-6)    | 0-33<br>(0-08 – 0-57)         | 22 677<br>(19 425 – 26 331)          | 26-2   |
| Saint Lucia                      | 3-79<br>(3-26 – 4-39) | 3-92<br>(3-33 – 4-52) | 3-78<br>(3-46 – 4-09) | 3-88<br>(3-56 – 4-2)  | 3-89<br>(3-57 – 4-2)  | 4-3<br>(3-67 – 4-99)    | 0-48<br>(0-2 – 0-7)           | 773<br>(657 – 899)                   | 57-02  |
| Saint Vincent and the Grenadines | 3-03<br>(2-61 – 3-49) | 3-13<br>(2-67 – 3-63) | 3-22<br>(2-77 – 3-72) | 3-3<br>(2-83 – 3-82)  | 3-37<br>(2-88 – 3-95) | 3-43<br>(2-94 – 3-99)   | 0-48<br>(0-26 – 0-7)          | 366<br>(313 – 429)                   | 23-69  |
| Suriname                         | 3-17<br>(2-71 – 3-63) | 3-2<br>(2-72 – 3-71)  | 3-24<br>(2-78 – 3-76) | 3-32<br>(2-82 – 3-87) | 3-41<br>(2-9 – 3-92)  | 3-51<br>(3-01 – 4-05)   | 0-4<br>(0-18 – 0-61)          | 1831<br>(1557 – 2117)                | 58-55  |
| Trinidad and Tobago              | 2-57<br>(2-18 – 2-98) | 2-61<br>(2-23 – 3-02) | 2-53<br>(2-22 – 2-83) | 2-72<br>(2-32 – 3-15) | 2-78<br>(2-37 – 3-16) | 2-81<br>(2-4 – 3-26)    | 0-35<br>(0-15 – 0-53)         | 3825<br>(3270 – 4466)                | 34-37  |
| Virgin Islands, U-S-             | 3-79<br>(3-24 – 4-38) | 3-88<br>(3-29 – 4-53) | 3-96<br>(3-4 – 4-58)  | 4-02<br>(3-41 – 4-64) | 4-09<br>(3-49 – 4-76) | 4-13<br>(3-52 – 4-82)   | 0-34<br>(0-09 – 0-55)         | 505<br>(427 – 595)                   | ..     |
| Central Latin America            | 4-28<br>(3-68 – 4-98) | 4-33<br>(3-69 – 5-07) | 4-53<br>(3-98 – 5-1)  | 4-36<br>(3-95 – 4-74) | 4-24<br>(3-79 – 4-72) | 4-6<br>(3-99 – 5-27)    | 0-28<br>(0-14 – 0-4)          | 1 128 647<br>(970 071 – 1 298 259)   | 68-75  |
| Colombia                         | 5-99<br>(5-2 – 6-9)   | 6-16<br>(5-24 – 7-31) | 7-14<br>(6-32 – 7-78) | 6-33<br>(5-91 – 6-79) | 5-74<br>(5-07 – 6-63) | 6-81<br>(5-85 – 7-91)   | 0-49<br>(0-23 – 0-79)         | 320 362<br>(274 546 – 373 583)       | 71-46  |
| Costa Rica                       | 2-86<br>(2-44 – 3-31) | 2-94<br>(2-51 – 3-37) | 3-22<br>(2-74 – 3-77) | 2-77<br>(2-39 – 3-16) | 3-16<br>(2-69 – 3-68) | 3-24<br>(2-75 – 3-77)   | 0-48<br>(0-25 – 0-72)         | 15 387<br>(13 021 – 17 974)          | 85-89  |
| El Salvador                      | 1-86<br>(1-58 – 2-14) | 1-92<br>(1-64 – 2-23) | 2-0<br>(1-72 – 2-29)  | 2-06<br>(1-75 – 2-36) | 2-0<br>(1-85 – 2-15)  | 2-07<br>(1-91 – 2-22)   | 0-42<br>(0-04 – 0-87)         | 12 372<br>(11 373 – 13 322)          | 36-57  |
| Guatemala                        | 4-24<br>(3-61 – 4-88) | 4-39<br>(3-74 – 5-2)  | 4-5<br>(3-83 – 5-18)  | 4-5<br>(3-93 – 5-07)  | 4-68<br>(4-03 – 5-31) | 4-99<br>(4-24 – 5-86)   | 0-63<br>(0-35 – 0-92)         | 75 793<br>(62 939 – 91 821)          | 111-1  |
| Honduras                         | 3-76<br>(3-18 – 4-38) | 3-9<br>(3-33 – 4-65)  | 4-04<br>(3-4 – 4-75)  | 4-16<br>(3-5 – 4-92)  | 4-27<br>(3-57 – 5-01) | 4-37<br>(3-68 – 5-09)   | 0-57<br>(0-32 – 0-83)         | 33 659<br>(27 975 – 39 419)          | 97-04  |
| Mexico                           | 3-88<br>(3-28 – 4-59) | 3-92<br>(3-29 – 4-65) | 3-81<br>(3-23 – 4-48) | 3-69<br>(3-33 – 4-06) | 3-67<br>(3-31 – 4-04) | 3-8<br>(3-29 – 4-36)    | -0-08<br>(-0-28 – 0-09)       | 476 921<br>(411 679 – 520 204)       | 52-65  |
| Nicaragua                        | 5-27<br>(4-46 – 6-14) | 4-79<br>(4-3 – 5-48)  | 6-65<br>(5-95 – 7-35) | 6-47<br>(5-59 – 7-35) | 5-78<br>(5-32 – 6-25) | 6-91<br>(5-86 – 7-91)   | 1-04<br>(0-73 – 1-37)         | 39 671<br>(33 230 – 46 376)          | 112-45 |
| Panama                           | 9-01<br>(7-76 – 10-6) | 7-82<br>(7-37 – 8-43) | 7-94<br>(7-61 – 8-3)  | 8-56<br>(8-16 – 8-96) | 9-03<br>(8-44 – 9-67) | 10-21<br>(8-77 – 11-73) | 0-48<br>(0-23 – 0-77)         | 39 418<br>(33 751 – 45 502)          | 93-73  |
| Venezuela                        | 3-32<br>(2-81 – 3-89) | 3-42<br>(2-92 – 3-94) | 3-36<br>(2-91 – 3-8)  | 3-67<br>(3-12 – 4-25) | 3-7<br>(3-12 – 4-29)  | 3-82<br>(3-24 – 4-45)   | 0-54<br>(0-33 – 0-77)         | 115 064<br>(96 988 – 135 135)        | 91-1   |
| Tropical Latin America           | 5-64<br>(4-93 – 6-53) | 5-51<br>(4-88 – 6-25) | 5-24<br>(4-71 – 5-74) | 5-23<br>(4-7 – 5-78)  | 5-0<br>(4-69 – 5-35)  | 5-12<br>(4-8 – 5-45)    | -0-37<br>(-0-81 – 0-02)       | 1 093 117<br>(1 024 805 – 1 166 501) | 30-51  |
| Brazil                           | 5-7<br>(4-97 – 6-59)  | 5-58<br>(4-94 – 6-34) | 5-29<br>(4-76 – 5-8)  | 5-28<br>(4-75 – 5-85) | 5-05<br>(4-74 – 5-41) | 5-16<br>(4-84 – 5-48)   | -0-38<br>(-0-84 – 0-01)       | 1 067 171<br>(1 001 689 – 1 138 268) | 29-58  |
| Paraguay                         | 3-49<br>(3-0 – 4-14)  | 2-89<br>(2-63 – 3-18) | 3-43<br>(3-15 – 3-74) | 3-25<br>(3-04 – 3-48) | 3-16<br>(2-98 – 3-34) | 4-03<br>(3-44 – 4-71)   | 0-55<br>(0-29 – 0-84)         | 25 945<br>(22 035 – 30 585)          | 85-43  |

|                                        |                          |                          |                         |                          |                          |                          |                          |                                        |        |
|----------------------------------------|--------------------------|--------------------------|-------------------------|--------------------------|--------------------------|--------------------------|--------------------------|----------------------------------------|--------|
| North Africa and Middle East           | 4-88<br>(4-21 – 5-64)    | 5-04<br>(4-35 – 5-84)    | 4-69<br>(4-15 – 5-28)   | 5-08<br>(4-5 – 5-8)      | 5-54<br>(4-92 – 6-22)    | 6-06<br>(5-43 – 6-88)    | 0-84<br>(0-65 – 1-0)     | 3 286 256<br>(2 916 614 – 3 798 035)   | 119-58 |
| Afghanistan                            | 5-55<br>(4-73 – 6-46)    | 5-57<br>(4-7 – 6-62)     | 5-63<br>(4-8 – 6-76)    | 5-06<br>(4-52 – 5-75)    | 6-42<br>(5-91 – 6-87)    | 6-13<br>(5-23 – 7-26)    | 0-38<br>(0-09 – 0-69)    | 186 654<br>(155 891 – 227 810)         | 207-78 |
| Algeria                                | 3-58<br>(2-98 – 4-25)    | 3-55<br>(3-09 – 4-17)    | 3-74<br>(3-17 – 4-37)   | 3-81<br>(3-26 – 4-52)    | 3-91<br>(3-33 – 4-6)     | 4-2<br>(3-6 – 4-94)      | 0-62<br>(0-27 – 0-99)    | 163 861<br>(138 980 – 193 457)         | 94-51  |
| Bahrain                                | 7-01<br>(5-97 – 8-2)     | 7-6<br>(7-09 – 8-12)     | 6-79<br>(5-86 – 8-09)   | 7-69<br>(6-62 – 8-99)    | 7-85<br>(6-72 – 9-34)    | 8-01<br>(6-83 – 9-55)    | 0-51<br>(0-23 – 0-82)    | 10 451<br>(8663 – 13 018)              | 226-91 |
| Egypt                                  | 6-94<br>(5-93 – 8-1)     | 7-21<br>(6-14 – 8-36)    | 6-93<br>(6-17 – 7-89)   | 7-56<br>(6-55 – 8-83)    | 7-71<br>(6-72 – 8-81)    | 8-14<br>(6-99 – 9-79)    | 0-62<br>(0-25 – 0-97)    | 712 227<br>(605 804 – 877 997)         | 96-49  |
| Iran                                   | 4-85<br>(4-13 – 5-76)    | 5-25<br>(4-51 – 6-1)     | 5-51<br>(4-66 – 6-58)   | 5-62<br>(4-81 – 6-73)    | 5-74<br>(4-93 – 6-74)    | 5-84<br>(5-11 – 6-76)    | 0-71<br>(0-39 – 1-02)    | 457 505<br>(394 519 – 536 110)         | 81-68  |
| Iraq                                   | 2-16<br>(1-86 – 2-51)    | 2-24<br>(1-9 – 2-59)     | 2-04<br>(1-79 – 2-3)    | 2-18<br>(1-99 – 2-37)    | 2-28<br>(2-03 – 2-51)    | 2-33<br>(1-99 – 2-73)    | 0-29<br>(0-04 – 0-51)    | 84 519<br>(71 009 – 100 032)           | 141-97 |
| Jordan                                 | 3-4<br>(2-88 – 4-04)     | 3-6<br>(3-04 – 4-33)     | 3-56<br>(3-16 – 4-01)   | 3-84<br>(3-23 – 4-53)    | 3-95<br>(3-38 – 4-65)    | 4-08<br>(3-48 – 4-82)    | 0-7<br>(0-41 – 1-01)     | 29 442<br>(24 705 – 35 195)            | 183-69 |
| Kuwait                                 | 5-31<br>(4-54 – 6-41)    | 5-25<br>(4-47 – 6-37)    | 5-56<br>(4-72 – 6-5)    | 5-61<br>(4-83 – 6-62)    | 5-87<br>(4-97 – 6-9)     | 6-11<br>(5-22 – 7-29)    | 0-54<br>(0-25 – 0-84)    | 22 558<br>(19 011 – 27 657)            | 124-24 |
| Lebanon                                | 3-55<br>(3-03 – 4-14)    | 3-65<br>(3-11 – 4-25)    | 3-48<br>(3-11 – 3-85)   | 3-89<br>(3-33 – 4-67)    | 4-0<br>(3-39 – 4-63)     | 4-07<br>(3-45 – 4-77)    | 0-53<br>(0-24 – 0-79)    | 23 309<br>(19 682 – 27 735)            | 150-27 |
| Libya                                  | 5-15<br>(4-37 – 6-14)    | 5-32<br>(4-57 – 6-26)    | 5-43<br>(4-68 – 6-4)    | 5-65<br>(4-77 – 6-68)    | 5-92<br>(5-08 – 6-89)    | 6-03<br>(5-23 – 7-02)    | 0-61<br>(0-28 – 0-93)    | 35 538<br>(30 645 – 42 287)            | 75-9   |
| Morocco                                | 2-66<br>(2-38 – 2-96)    | 3-16<br>(2-68 – 3-75)    | 3-36<br>(2-94 – 3-78)   | 3-43<br>(2-91 – 4-04)    | 3-54<br>(3-03 – 4-15)    | 3-66<br>(3-08 – 4-39)    | 1-23<br>(0-84 – 1-69)    | 120 089<br>(99 811 – 146 430)          | 98-48  |
| Oman                                   | 4-79<br>(4-15 – 5-6)     | 4-74<br>(4-42 – 5-03)    | 5-42<br>(4-73 – 6-19)   | 6-19<br>(5-34 – 7-39)    | 6-71<br>(5-72 – 7-7)     | 7-15<br>(6-2 – 8-4)      | 1-54<br>(1-26 – 1-89)    | 30 916<br>(25 915 – 38 000)            | 285-18 |
| Palestine                              | 5-18<br>(4-36 – 6-01)    | 5-38<br>(4-64 – 6-36)    | 5-41<br>(4-75 – 6-1)    | 5-43<br>(4-78 – 6-34)    | 5-22<br>(4-44 – 6-05)    | 5-35<br>(4-57 – 6-2)     | 0-13<br>(-0-22 – 0-44)   | 25 291<br>(21 148 – 30 092)            | 161-26 |
| Qatar                                  | 9-12<br>(7-88 – 10-57)   | 8-49<br>(7-9 – 9-12)     | 8-74<br>(8-18 – 9-37)   | 10-05<br>(8-67 – 11-74)  | 10-31<br>(8-76 – 12-01)  | 10-51<br>(9-11 – 12-21)  | 0-55<br>(0-19 – 0-89)    | 22 037<br>(18 192 – 26 838)            | 452-25 |
| Saudi Arabia                           | 6-4<br>(5-54 – 7-46)     | 6-14<br>(5-27 – 7-14)    | 6-66<br>(5-71 – 7-72)   | 6-9<br>(5-95 – 7-97)     | 7-06<br>(6-08 – 8-16)    | 7-25<br>(6-33 – 8-23)    | 0-48<br>(0-29 – 0-63)    | 216 427<br>(187 657 – 250 264)         | 126-11 |
| Sudan                                  | 4-06<br>(3-45 – 4-81)    | 4-11<br>(3-5 – 4-89)     | 4-18<br>(3-56 – 5-04)   | 4-37<br>(3-75 – 5-27)    | 4-55<br>(3-85 – 5-41)    | 4-77<br>(4-08 – 5-67)    | 0-62<br>(0-22 – 0-92)    | 173 011<br>(145 714 – 212 388)         | 142-65 |
| Syria                                  | 3-89<br>(3-28 – 4-56)    | 4-1<br>(3-5 – 4-78)      | 4-05<br>(3-62 – 4-58)   | 4-47<br>(3-83 – 5-23)    | 4-69<br>(3-98 – 5-46)    | 4-83<br>(4-16 – 5-66)    | 0-83<br>(0-49 – 1-13)    | 81 921<br>(69 881 – 97 794)            | 85-5   |
| Tunisia                                | 4-69<br>(3-97 – 5-65)    | 4-9<br>(4-2 – 5-97)      | 5-1<br>(4-3 – 5-97)     | 5-26<br>(4-52 – 6-32)    | 5-39<br>(4-61 – 6-35)    | 5-54<br>(4-77 – 6-57)    | 0-64<br>(0-28 – 0-91)    | 61 770<br>(53 049 – 73 614)            | 69-89  |
| Turkey                                 | 5-54<br>(4-76 – 6-46)    | 5-66<br>(4-83 – 6-84)    | 3-34<br>(3-27 – 3-43)   | 4-63<br>(4-39 – 4-88)    | 6-48<br>(6-13 – 6-83)    | 8-95<br>(8-63 – 9-25)    | 1-85<br>(1-31 – 2-37)    | 699 558<br>(673 022 – 724 144)         | 145-43 |
| United Arab Emirates                   | 5-41<br>(4-63 – 6-52)    | 5-57<br>(5-13 – 6-03)    | 5-6<br>(4-86 – 6-64)    | 6-19<br>(5-3 – 7-32)     | 6-27<br>(5-29 – 7-4)     | 6-48<br>(5-43 – 7-89)    | 0-69<br>(0-35 – 1-02)    | 57 991<br>(46 637 – 74 231)            | 530-74 |
| Yemen                                  | 2-31<br>(1-98 – 2-75)    | 2-39<br>(2-05 – 2-8)     | 2-52<br>(2-15 – 2-96)   | 2-32<br>(2-05 – 2-63)    | 2-7<br>(2-46 – 2-95)     | 2-87<br>(2-62 – 3-12)    | 0-83<br>(0-4 – 1-22)     | 67 826<br>(60 315 – 75 344)            | 178-18 |
| South Asia                             | 3-74<br>(3-18 – 4-36)    | 3-36<br>(2-99 – 3-74)    | 3-83<br>(3-22 – 4-55)   | 4-06<br>(3-59 – 4-5)     | 3-82<br>(3-29 – 4-39)    | 4-04<br>(3-42 – 4-69)    | 0-3<br>(0-18 – 0-42)     | 6 017 076<br>(5 057 230 – 7 056 139)   | 77-97  |
| Bangladesh                             | 3-5<br>(2-97 – 4-11)     | 3-66<br>(3-14 – 4-24)    | 3-75<br>(3-19 – 4-33)   | 3-84<br>(3-3 – 4-45)     | 3-99<br>(3-41 – 4-62)    | 4-13<br>(3-51 – 4-79)    | 0-64<br>(0-46 – 0-82)    | 569 520<br>(479 917 – 668 141)         | 99-06  |
| Bhutan                                 | 3-88<br>(3-32 – 4-5)     | 4-1<br>(3-49 – 4-76)     | 3-83<br>(3-47 – 4-21)   | 4-03<br>(3-65 – 4-42)    | 4-77<br>(4-07 – 5-59)    | 4-94<br>(4-23 – 5-73)    | 0-93<br>(0-74 – 1-13)    | 3346<br>(2838 – 3917)                  | 103-76 |
| India                                  | 3-64<br>(3-04 – 4-31)    | 3-16<br>(2-84 – 3-49)    | 3-72<br>(3-1 – 4-46)    | 4-1<br>(3-62 – 4-56)     | 3-77<br>(3-2 – 4-38)     | 3-85<br>(3-23 – 4-49)    | 0-21<br>(0-07 – 0-36)    | 4 493 492<br>(3 766 824 – 5 296 350)   | 72-47  |
| Nepal                                  | 2-16<br>(1-85 – 2-51)    | 2-28<br>(1-94 – 2-63)    | 2-22<br>(1-95 – 2-49)   | 2-31<br>(2-02 – 2-61)    | 2-52<br>(2-16 – 2-91)    | 2-58<br>(2-2 – 2-98)     | 0-68<br>(0-47 – 0-89)    | 66 347<br>(56 006 – 76 531)            | 103-2  |
| Pakistan                               | 5-09<br>(4-71 – 5-4)     | 4-89<br>(4-21 – 5-62)    | 5-08<br>(4-31 – 5-93)   | 4-17<br>(3-85 – 4-51)    | 4-27<br>(3-92 – 4-59)    | 5-6<br>(4-77 – 6-52)     | 0-36<br>(-0-09 – 0-84)   | 884 371<br>(747 031 – 1 032 304)       | 94-24  |
| Southeast Asia, East Asia, and Oceania | 3-57<br>(3-24 – 3-91)    | 2-66<br>(2-48 – 2-85)    | 2-81<br>(2-62 – 3-0)    | 3-18<br>(2-95 – 3-4)     | 3-67<br>(3-39 – 3-95)    | 5-12<br>(4-7 – 5-56)     | 1-39<br>(1-31 – 1-46)    | 10 736 942<br>(9 832 370 – 11 689 204) | 100-13 |
| East Asia                              | 3-54<br>(3-22 – 3-86)    | 2-26<br>(2-14 – 2-38)    | 2-45<br>(2-31 – 2-59)   | 2-81<br>(2-62 – 3-0)     | 3-38<br>(3-08 – 3-67)    | 5-46<br>(5-12 – 5-81)    | 1-67<br>(1-51 – 1-82)    | 7 968 349<br>(7 452 086 – 8 487 849)   | 105-91 |
| China                                  | 3-21<br>(2-94 – 3-49)    | 1-91<br>(1-8 – 2-01)     | 2-12<br>(1-99 – 2-24)   | 2-49<br>(2-32 – 2-66)    | 3-01<br>(2-76 – 3-25)    | 5-17<br>(4-87 – 5-47)    | 1-83<br>(1-66 – 1-99)    | 7 277 644<br>(6 829 769 – 7 709 671)   | 114-41 |
| North Korea                            | 7-56<br>(6-43 – 8-77)    | 7-48<br>(6-41 – 8-66)    | 7-24<br>(6-2 – 8-3)     | 7-19<br>(6-12 – 8-3)     | 7-19<br>(6-17 – 8-37)    | 7-24<br>(6-17 – 8-51)    | -0-16<br>(-0-38 – -0-05) | 192 421<br>(163 680 – 225 942)         | 29-97  |
| Taiwan                                 | 17:31<br>(14-86 – 19-93) | 16-14<br>(15-63 – 16-65) | 15-47<br>(15-1 – 15-84) | 15-42<br>(14-93 – 15-94) | 19:23<br>(16-55 – 22-09) | 19-61<br>(17-04 – 22-44) | 0-48<br>(0-17 – 0-77)    | 498 284<br>(428 374 – 575 081)         | 52-17  |
| Oceania                                | 5-28<br>(4-52 – 6-34)    | 5-01<br>(4-49 – 5-62)    | 5-44<br>(4-69 – 6-44)   | 5-54<br>(4-74 – 6-57)    | 5-66<br>(4-85 – 6-65)    | 5-77<br>(4-94 – 7-03)    | 0-34<br>(0-15 – 0-54)    | 60 363<br>(50 770 – 75 864)            | 88-63  |
| American Samoa                         | 6-46<br>(5-53 – 7-69)    | 6-72<br>(5-76 – 7-9)     | 6-72<br>(5-67 – 8-2)    | 6-86<br>(5-89 – 8-0)     | 7-05<br>(5-97 – 8-54)    | 7-06<br>(6-09 – 8-24)    | 0-34<br>(0-1 – 0-58)     | 540<br>(455 – 647)                     | ..     |
| Federated States of Micronesia         | 5-58<br>(4-77 – 6-55)    | 5-92<br>(5-03 – 7-34)    | 5-99<br>(5-12 – 7-36)   | 6-23<br>(5-32 – 7-39)    | 6-39<br>(5-42 – 7-67)    | 6-38<br>(5-51 – 7-33)    | 0-52<br>(0-21 – 0-83)    | 605<br>(511 – 712)                     | 19-61  |
| Fiji                                   | 6-39<br>(5-42 – 7-77)    | 6-74<br>(5-71 – 8-36)    | 6-67<br>(5-78 – 7-74)   | 6-83<br>(5-86 – 8-0)     | 7-01<br>(6-05 – 8-13)    | 7-12<br>(6-07 – 8-71)    | 0-42<br>(0-13 – 0-68)    | 5933<br>(4984 – 7408)                  | 40-49  |
| Guam                                   | 7-23<br>(6-16 – 8-42)    | 7-61<br>(6-4 – 9-39)     | 7-42<br>(6-34 – 8-76)   | 7-53<br>(6-48 – 8-71)    | 7-65<br>(6-52 – 9-04)    | 7-61<br>(6-58 – 8-93)    | 0-2<br>(-0-06 – -0-49)   | 1325<br>(1144 – 1556)                  | ..     |
| Kiribati                               | 4-99<br>(4-24 – 5-98)    | 5-2<br>(4-42 – 6-23)     | 5-18<br>(4-38 – 6-41)   | 5-36<br>(4-49 – 6-4)     | 5-53<br>(4-65 – 6-85)    | 5-55<br>(4-69 – 6-49)    | 0-41<br>(0-13 – 0-72)    | 590<br>(492 – 704)                     | 68-86  |
| Marshall Islands                       | 5-64<br>(4-86 – 6-64)    | 5-85<br>(5-0 – 6-78)     | 5-81<br>(4-9 – 6-82)    | 6-0<br>(5-12 – 7-27)     | 6-11<br>(5-2 – 7-28)     | 6-23<br>(5-31 – 7-51)    | 0-38<br>(0-1 – 0-69)     | 432<br>(360 – 538)                     | 86-39  |

|                                  |                       |                       |                       |                       |                       |                        |                        |                                      |        |
|----------------------------------|-----------------------|-----------------------|-----------------------|-----------------------|-----------------------|------------------------|------------------------|--------------------------------------|--------|
| Northern Mariana Islands         | 6-94<br>(5-94 – 8-26) | 7-33<br>(6-35 – 8-74) | 7-3<br>(6-26 – 8-59)  | 7-52<br>(6-42 – 8-8)  | 7-57<br>(6-51 – 9-09) | 7-5<br>(6-34 – 9-0)    | 0-3<br>(0-01 – 0-63)   | 878<br>(724 – 1103)                  | ..     |
| Papua New Guinea                 | 4-96<br>(4-21 – 6-04) | 4-43<br>(4-06 – 4-89) | 5-11<br>(4-35 – 6-08) | 5-21<br>(4-41 – 6-22) | 5-33<br>(4-52 – 6-31) | 5-47<br>(4-64 – 6-76)  | 0-38<br>(0-11 – 0-66)  | 39 943<br>(33 442 – 51 069)          | 109-58 |
| Samoa                            | 5-61<br>(4-77 – 6-68) | 5-88<br>(4-97 – 6-99) | 5-87<br>(5-03 – 6-92) | 5-95<br>(5-03 – 6-88) | 6-05<br>(5-13 – 6-97) | 6-17<br>(5-21 – 7-36)  | 0-37<br>(0-07 – 0-7)   | 1166<br>(971 – 1408)                 | 34-39  |
| Solomon Islands                  | 5-06<br>(4-34 – 5-98) | 5-29<br>(4-52 – 6-24) | 5-26<br>(4-49 – 6-26) | 5-3<br>(4-48 – 6-3)   | 5-46<br>(4-63 – 6-44) | 5-6<br>(4-76 – 6-5)    | 0-39<br>(0-09 – 0-74)  | 3098<br>(2564 – 3673)                | 115-47 |
| Tonga                            | 5-67<br>(4-83 – 6-86) | 5-87<br>(4-98 – 6-99) | 5-87<br>(4-98 – 7-2)  | 6-03<br>(5-11 – 7-48) | 6-17<br>(5-2 – 7-27)  | 6-24<br>(5-35 – 7-46)  | 0-37<br>(0-07 – 0-61)  | 638<br>(542 – 772)                   | 23-51  |
| Vanuatu                          | 5-14<br>(4-36 – 6-21) | 5-35<br>(4-53 – 6-36) | 5-32<br>(4-54 – 6-36) | 5-51<br>(4-63 – 6-84) | 5-64<br>(4-81 – 6-64) | 5-72<br>(4-86 – 6-87)  | 0-41<br>(0-14 – 0-69)  | 1483<br>(1242 – 1816)                | 105-22 |
| Southeast Asia                   | 3-66<br>(3-27 – 4-08) | 3-7<br>(3-34 – 4-1)   | 3-63<br>(3-28 – 4-01) | 3-98<br>(3-67 – 4-32) | 4-27<br>(4-02 – 4-51) | 4-35<br>(3-68 – 5-12)  | 0-66<br>(0-42 – 0-9)   | 2 708 230<br>(2 282 862 – 3 209 352) | 85-1   |
| Cambodia                         | 4-5<br>(3-83 – 5-2)   | 4-59<br>(3-89 – 5-33) | 3-85<br>(3-58 – 4-16) | 4-23<br>(4-05 – 4-41) | 4-61<br>(4-42 – 4-79) | 4-38<br>(3-97 – 4-9)   | -0-1<br>(-0-46 – 0-26) | 62 696<br>(56 449 – 70 614)          | 88-12  |
| Indonesia                        | 3-56<br>(3-34 – 3-77) | 3-44<br>(3-33 – 3-55) | 3-09<br>(3-0 – 3-19)  | 3-87<br>(3-73 – 4-01) | 4-52<br>(4-36 – 4-67) | 4-16<br>(3-43 – 5-06)  | 0-6<br>(-0-0 – 1-25)   | 1 011 617<br>(827 894 – 1 250 320)   | 87-12  |
| Laos                             | 3-51<br>(2-98 – 4-12) | 3-64<br>(3-12 – 4-23) | 3-74<br>(3-18 – 4-34) | 3-92<br>(3-36 – 4-58) | 4-03<br>(3-45 – 4-64) | 4-18<br>(3-57 – 4-91)  | 0-67<br>(0-45 – 0-86)  | 26 628<br>(22 460 – 31 447)          | 108-37 |
| Malaysia                         | 7-72<br>(6-58 – 9-08) | 7-94<br>(6-78 – 9-24) | 8-18<br>(7-02 – 9-43) | 8-62<br>(7-38 – 10-0) | 7-99<br>(7-4 – 8-65)  | 9-13<br>(7-76 – 10-62) | 0-64<br>(0-44 – 0-84)  | 259 560<br>(219 501 – 304 103)       | 111-38 |
| Maldives                         | 3-9<br>(3-1 – 4-55)   | 4-08<br>(3-45 – 4-74) | 4-23<br>(3-58 – 4-9)  | 4-47<br>(3-76 – 5-23) | 4-65<br>(3-92 – 5-41) | 4-82<br>(4-09 – 5-6)   | 0-81<br>(0-64 – 1-01)  | 1554<br>(1308 – 1840)                | 132-79 |
| Mauritius                        | 4-54<br>(3-83 – 5-27) | 4-7<br>(4-01 – 5-48)  | 4-77<br>(4-04 – 5-53) | 4-93<br>(4-18 – 5-73) | 5-02<br>(4-3 – 5-85)  | 5-1<br>(4-34 – 5-96)   | 0-45<br>(0-24 – 0-65)  | 6631<br>(5616 – 7780)                | 56-31  |
| Myanmar                          | 3-66<br>(3-1 – 4-24)  | 3-76<br>(3-18 – 4-36) | 3-83<br>(3-26 – 4-45) | 4-05<br>(3-42 – 4-75) | 4-28<br>(3-62 – 4-94) | 4-46<br>(3-8 – 5-19)   | 0-76<br>(0-59 – 0-94)  | 225 165<br>(189 459 – 264 997)       | 69-5   |
| Philippines                      | 5-19<br>(4-44 – 6-01) | 5-28<br>(4-52 – 6-2)  | 5-36<br>(4-54 – 6-2)  | 5-53<br>(4-73 – 6-4)  | 5-14<br>(4-76 – 5-54) | 5-74<br>(4-87 – 6-63)  | 0-39<br>(0-18 – 0-63)  | 531 660<br>(447 361 – 620 236)       | 94-92  |
| Sri Lanka                        | 4-17<br>(3-54 – 4-83) | 4-35<br>(3-71 – 5-07) | 4-42<br>(3-77 – 5-14) | 4-58<br>(3-88 – 5-29) | 4-71<br>(4-03 – 5-42) | 4-91<br>(4-17 – 5-73)  | 0-63<br>(0-43 – 0-85)  | 102 564<br>(86 441 – 119 754)        | 57-87  |
| Seychelles                       | 3-75<br>(3-18 – 4-35) | 4-25<br>(3-64 – 4-92) | 3-85<br>(3-29 – 4-48) | 4-25<br>(3-62 – 4-91) | 4-24<br>(3-66 – 4-87) | 4-16<br>(3-6 – 4-71)   | 0-4<br>(0-05 – 0-66)   | 398<br>(343 – 453)                   | 66-09  |
| Thailand                         | 2-37<br>(2-02 – 2-73) | 2-47<br>(2-09 – 2-85) | 2-64<br>(2-26 – 2-98) | 2-41<br>(2-17 – 2-62) | 2-77<br>(2-51 – 2-98) | 2-75<br>(2-34 – 3-19)  | 0-57<br>(0-38 – 0-75)  | 195 444<br>(165 287 – 228 016)       | 63-85  |
| Timor-Leste                      | 4-69<br>(4-01 – 5-49) | 4-85<br>(4-13 – 5-69) | 4-48<br>(3-95 – 5-08) | 5-1<br>(4-66 – 5-53)  | 5-3<br>(4-81 – 5-78)  | 5-58<br>(4-73 – 6-54)  | 0-67<br>(0-47 – 0-88)  | 5785<br>(4860 – 6959)                | 101-39 |
| Vietnam                          | 2-57<br>(2-19 – 2-95) | 2-68<br>(2-26 – 3-1)  | 2-78<br>(2-38 – 3-23) | 2-61<br>(2-49 – 2-73) | 2-65<br>(2-46 – 2-84) | 3-04<br>(2-57 – 3-49)  | 0-64<br>(0-43 – 0-87)  | 274 625<br>(232 238 – 317 955)       | 78-68  |
| Sub-Saharan Africa               | 3-87<br>(3-35 – 4-48) | 3-85<br>(3-34 – 4-45) | 3-55<br>(3-14 – 4-0)  | 3-67<br>(3-29 – 4-07) | 3-8<br>(3-38 – 4-27)  | 4-15<br>(3-59 – 4-79)  | 0-27<br>(0-19 – 0-35)  | 3 670 266<br>(3 133 629 – 4 299 669) | 118-53 |
| Central sub-Saharan Africa       | 3-77<br>(3-24 – 4-42) | 3-8<br>(3-28 – 4-42)  | 3-74<br>(3-26 – 4-37) | 3-67<br>(3-19 – 4-19) | 3-73<br>(3-23 – 4-29) | 4-04<br>(3-43 – 4-77)  | 0-26<br>(0-04 – 0-45)  | 430 168<br>(358 847 – 518 324)       | 141-46 |
| Angola                           | 3-66<br>(3-11 – 4-31) | 3-74<br>(3-18 – 4-38) | 3-78<br>(3-27 – 4-41) | 3-45<br>(3-14 – 3-8)  | 3-58<br>(3-27 – 3-94) | 4-28<br>(3-65 – 4-94)  | 0-61<br>(0-31 – 0-88)  | 99 629<br>(82 353 – 116 204)         | 174-76 |
| Central African Republic         | 3-65<br>(3-14 – 4-27) | 3-71<br>(3-23 – 4-27) | 3-72<br>(3-21 – 4-3)  | 3-79<br>(3-26 – 4-43) | 3-86<br>(3-29 – 4-5)  | 3-89<br>(3-27 – 4-73)  | 0-24<br>(-0-09 – 0-55) | 17 872<br>(14 677 – 22 651)          | 83-35  |
| Congo (Brazzaville)              | 4-06<br>(3-46 – 4-71) | 4-2<br>(3-62 – 5-0)   | 4-25<br>(3-62 – 4-96) | 4-39<br>(3-73 – 5-15) | 4-46<br>(3-84 – 5-2)  | 4-65<br>(3-97 – 5-51)  | 0-52<br>(0-17 – 0-83)  | 20 107<br>(16 975 – 24 615)          | 126-57 |
| Democratic Republic of the Congo | 3-78<br>(3-22 – 4-46) | 3-77<br>(3-23 – 4-41) | 3-67<br>(3-17 – 4-31) | 3-64<br>(3-11 – 4-22) | 3-67<br>(3-12 – 4-31) | 3-89<br>(3-29 – 4-64)  | 0-11<br>(-0-16 – 0-36) | 280 282<br>(232 494 – 343 722)       | 137-28 |
| Equatorial Guinea                | 3-79<br>(3-22 – 4-5)  | 3-88<br>(3-34 – 4-57) | 4-34<br>(3-7 – 5-21)  | 4-75<br>(4-11 – 5-6)  | 5-0<br>(4-3 – 5-93)   | 5-24<br>(4-46 – 6-15)  | 1-24<br>(0-95 – 1-57)  | 4070<br>(3409 – 4921)                | 209-92 |
| Gabon                            | 4-34<br>(3-68 – 5-08) | 4-5<br>(3-81 – 5-23)  | 4-63<br>(3-99 – 5-49) | 4-71<br>(4-03 – 5-51) | 4-85<br>(4-13 – 5-6)  | 5-01<br>(4-26 – 5-98)  | 0-56<br>(0-24 – 0-85)  | 8208<br>(6851 – 10 074)              | 113-95 |
| Eastern sub-Saharan Africa       | 3-99<br>(3-43 – 4-65) | 4-14<br>(3-59 – 4-76) | 3-76<br>(3-37 – 4-21) | 3-88<br>(3-52 – 4-28) | 3-96<br>(3-56 – 4-44) | 4-39<br>(3-84 – 5-02)  | 0-37<br>(0-24 – 0-5)   | 1 561 084<br>(1 339 433 – 1 820 107) | 129-34 |
| Burundi                          | 6-43<br>(5-51 – 7-78) | 5-49<br>(4-85 – 6-42) | 5-96<br>(5-5 – 6-45)  | 7-0<br>(6-61 – 7-37)  | 6-68<br>(5-7 – 7-75)  | 6-95<br>(5-92 – 8-21)  | 0-3<br>(-0-0 – 0-67)   | 74 720<br>(62 784 – 90 857)          | 125-41 |
| Comoros                          | 4-27<br>(3-6 – 5-19)  | 4-35<br>(3-75 – 5-08) | 4-4<br>(3-82 – 5-12)  | 4-51<br>(3-85 – 5-34) | 4-62<br>(3-9 – 5-56)  | 4-79<br>(4-07 – 5-71)  | 0-45<br>(0-18 – 0-75)  | 3458<br>(2867 – 4317)                | 118-47 |
| Djibouti                         | 4-02<br>(3-45 – 4-81) | 4-09<br>(3-5 – 4-81)  | 4-19<br>(3-58 – 4-96) | 4-33<br>(3-67 – 5-07) | 4-48<br>(3-81 – 5-27) | 4-64<br>(3-89 – 5-62)  | 0-55<br>(0-25 – 0-87)  | 4245<br>(3513 – 5234)                | 92-79  |
| Eritrea                          | 3-94<br>(3-37 – 4-65) | 4-09<br>(3-45 – 5-13) | 4-27<br>(3-66 – 5-07) | 4-36<br>(3-7 – 5-12)  | 4-44<br>(3-77 – 5-32) | 4-52<br>(3-85 – 5-22)  | 0-53<br>(0-25 – 0-88)  | 22 143<br>(18 469 – 26 160)          | 96-1   |
| Ethiopia                         | 3-57<br>(2-98 – 4-31) | 4-39<br>(3-63 – 5-14) | 3-27<br>(2-92 – 3-66) | 2-82<br>(2-45 – 3-27) | 3-18<br>(2-76 – 3-82) | 3-8<br>(3-23 – 4-43)   | 0-24<br>(-0-1 – 0-54)  | 353 712<br>(292 168 – 417 388)       | 128-37 |
| Kenya                            | 4-34<br>(3-75 – 5-05) | 3-54<br>(3-04 – 4-14) | 3-53<br>(3-03 – 4-12) | 4-19<br>(3-62 – 4-9)  | 3-79<br>(3-26 – 4-43) | 4-38<br>(3-79 – 5-09)  | 0-03<br>(-0-03 – 0-1)  | 186 683<br>(159 851 – 221 903)       | 103-41 |
| Madagascar                       | 4-19<br>(3-56 – 5-03) | 4-24<br>(3-57 – 5-06) | 4-26<br>(3-61 – 4-97) | 4-3<br>(3-68 – 5-05)  | 4-36<br>(3-74 – 5-09) | 4-51<br>(3-8 – 5-51)   | 0-28<br>(-0-02 – 0-56) | 104 087<br>(86 119 – 131 593)        | 131-22 |
| Malawi                           | 3-04<br>(2-59 – 3-5)  | 3-1<br>(2-61 – 3-75)  | 3-18<br>(2-68 – 3-86) | 3-06<br>(2-77 – 3-35) | 2-93<br>(2-66 – 3-23) | 3-44<br>(2-92 – 4-09)  | 0-48<br>(0-22 – 0-74)  | 56 879<br>(47 167 – 67 947)          | 116-97 |
| Mozambique                       | 3-85<br>(3-24 – 4-6)  | 3-86<br>(3-27 – 4-61) | 3-94<br>(3-36 – 4-71) | 4-02<br>(3-45 – 4-76) | 4-11<br>(3-5 – 4-82)  | 4-23<br>(3-64 – 4-96)  | 0-36<br>(0-06 – 0-7)   | 112 921<br>(94 542 – 135 721)        | 137-88 |
| Rwanda                           | 4-77<br>(4-09 – 5-68) | 4-84<br>(4-15 – 5-71) | 5-85<br>(5-41 – 6-25) | 5-88<br>(5-44 – 6-3)  | 4-82<br>(4-4 – 5-28)  | 5-95<br>(5-53 – 6-33)  | 0-85<br>(0-37 – 1-28)  | 66 019<br>(60 787 – 71 464)          | 109-23 |
| Somalia                          | 3-96<br>(3-35 – 4-69) | 3-97<br>(3-4 – 4-64)  | 3-94<br>(3-35 – 4-66) | 3-97<br>(3-4 – 4-67)  | 4-05<br>(3-5 – 4-74)  | 4-1<br>(3-51 – 4-8)    | 0-14<br>(-0-14 – 0-46) | 39 150<br>(32 438 – 47 323)          | 74-64  |
| South Sudan                      | 3-65<br>(3-1 – 4-39)  | 3-65<br>(3-09 – 4-24) | 3-67<br>(3-13 – 4-28) | 3-73<br>(3-18 – 4-42) | 3-8<br>(3-23 – 4-45)  | 3-84<br>(3-28 – 4-65)  | 0-19<br>(-0-11 – 0-45) | 48 410<br>(40 492 – 59 349)          | 136-14 |

|                             |                       |                       |                       |                       |                       |                       |                           |                                      |        |
|-----------------------------|-----------------------|-----------------------|-----------------------|-----------------------|-----------------------|-----------------------|---------------------------|--------------------------------------|--------|
| Tanzania                    | 4-58<br>(4-09 – 5-13) | 4-69<br>(4-12 – 5-4)  | 4-11<br>(3-81 – 4-48) | 4-84<br>(4-57 – 5-12) | 4-76<br>(4-45 – 5-05) | 5-44<br>(4-7 – 6-35)  | 0-66<br>(0-32 – 1-03)     | 273 739<br>(227 362 – 328 590)       | 154-25 |
| Uganda                      | 4-18<br>(3-57 – 5-01) | 4-31<br>(3-71 – 5-1)  | 3-78<br>(3-38 – 4-2)  | 3-9<br>(3-48 – 4-35)  | 4-42<br>(4-25 – 4-6)  | 4-55<br>(4-29 – 4-82) | 0-33<br>(-0-27 – 0-83)    | 166 752<br>(154 154 – 179 120)       | 147    |
| Zambia                      | 2-28<br>(1-91 – 2-75) | 2-38<br>(2-13 – 2-71) | 2-64<br>(2-41 – 2-89) | 2-77<br>(2-57 – 2-98) | 3-33<br>(2-89 – 3-71) | 3-09<br>(2-62 – 3-68) | 1-17<br>(0-76 – 1-79)     | 47 157<br>(38 543 – 58 043)          | 175-88 |
| Southern sub-Saharan Africa | 4-24<br>(3-66 – 4-88) | 3-39<br>(2-92 – 3-94) | 3-08<br>(2-65 – 3-57) | 3-15<br>(2-71 – 3-64) | 3-3<br>(2-83 – 3-8)   | 3-53<br>(3-03 – 4-08) | -0-71<br>(-0-8 to -0-59)  | 237 285<br>(201 002 – 277 822)       | 28-81  |
| Botswana                    | 3-48<br>(2-98 – 4-05) | 3-57<br>(3-03 – 4-17) | 3-68<br>(3-11 – 4-34) | 3-64<br>(3-12 – 4-24) | 3-67<br>(3-14 – 4-26) | 3-78<br>(3-21 – 4-43) | 0-32<br>(0-05 – 0-58)     | 7558<br>(6309 – 9058)                | 98-99  |
| Lesotho                     | 3-12<br>(2-68 – 3-61) | 3-18<br>(2-72 – 3-72) | 3-24<br>(2-77 – 3-73) | 3-21<br>(2-76 – 3-75) | 3-22<br>(2-75 – 3-76) | 3-33<br>(2-83 – 3-9)  | 0-25<br>(0-01 – 0-51)     | 5948<br>(4945 – 7144)                | 45-18  |
| Namibia                     | 3-26<br>(2-82 – 3-81) | 3-34<br>(2-86 – 3-9)  | 3-46<br>(2-98 – 4-04) | 3-44<br>(2-96 – 4-0)  | 3-42<br>(2-91 – 3-96) | 3-57<br>(3-03 – 4-15) | 0-35<br>(0-13 – 0-59)     | 7573<br>(6346 – 9033)                | 100-9  |
| South Africa                | 4-58<br>(3-95 – 5-27) | 3-4<br>(2-93 – 3-94)  | 2-96<br>(2-53 – 3-42) | 3-08<br>(2-65 – 3-56) | 3-3<br>(2-85 – 3-79)  | 3-58<br>(3-08 – 4-14) | -0-95<br>(-1-06 to -0-81) | 171 156<br>(145 691 – 199 552)       | 19-64  |
| Swaziland (eSwatini)        | 3-33<br>(2-87 – 3-88) | 3-43<br>(2-93 – 3-99) | 3-54<br>(3-05 – 4-05) | 3-38<br>(2-89 – 3-93) | 3-32<br>(2-83 – 3-87) | 3-56<br>(2-99 – 4-14) | 0-25<br>(0-01 – 0-48)     | 3908<br>(3248 – 4709)                | 74-72  |
| Zimbabwe                    | 3-27<br>(2-8 – 3-76)  | 3-36<br>(2-87 – 3-91) | 3-4<br>(2-91 – 3-92)  | 3-29<br>(2-81 – 3-85) | 3-12<br>(2-66 – 3-65) | 3-18<br>(2-7 – 3-71)  | -0-11<br>(-0-35 – 0-13)   | 41 142<br>(34 271 – 49 725)          | 50-94  |
| Western sub-Saharan Africa  | 3-63<br>(3-13 – 4-21) | 3-7<br>(3-2 – 4-33)   | 3-4<br>(3-02 – 3-87)  | 3-59<br>(3-23 – 3-99) | 3-75<br>(3-35 – 4-2)  | 4-05<br>(3-48 – 4-72) | 0-42<br>(0-28 – 0-55)     | 1 441 729<br>(1 219 671 – 1 712 639) | 126-53 |
| Benin                       | 3-64<br>(3-13 – 4-29) | 3-73<br>(3-19 – 4-31) | 3-82<br>(3-24 – 4-51) | 3-86<br>(3-27 – 4-54) | 3-98<br>(3-42 – 4-7)  | 4-06<br>(3-49 – 4-68) | 0-42<br>(0-09 – 0-68)     | 41 545<br>(35 084 – 49 031)          | 157-61 |
| Burkina Faso                | 1-58<br>(1-35 – 1-83) | 1-62<br>(1-37 – 1-9)  | 1-43<br>(1-22 – 1-67) | 1-46<br>(1-24 – 1-7)  | 1-93<br>(1-66 – 2-22) | 2-0<br>(1-71 – 2-32)  | 0-92<br>(0-63 – 1-24)     | 34 367<br>(28 439 – 40 703)          | 176-44 |
| Cameroon                    | 4-04<br>(3-45 – 4-83) | 4-11<br>(3-46 – 4-81) | 4-19<br>(3-56 – 4-89) | 4-26<br>(3-65 – 5-03) | 4-3<br>(3-64 – 5-03)  | 4-44<br>(3-75 – 5-29) | 0-36<br>(0-12 – 0-65)     | 95 631<br>(78 725 – 120 746)         | 121-04 |
| Cape Verde                  | 4-42<br>(3-79 – 5-21) | 4-56<br>(3-91 – 5-29) | 4-73<br>(4-01 – 5-62) | 4-44<br>(4-1 – 4-76)  | 4-64<br>(4-3 – 4-96)  | 5-39<br>(4-63 – 6-39) | 0-76<br>(0-44 – 1-09)     | 2749<br>(2318 – 3302)                | 104-73 |
| Chad                        | 3-54<br>(3-04 – 4-18) | 3-62<br>(3-05 – 4-36) | 3-64<br>(3-1 – 4-27)  | 3-7<br>(3-14 – 4-26)  | 3-8<br>(3-21 – 4-56)  | 3-89<br>(3-32 – 4-71) | 0-36<br>(0-1 – 0-62)      | 49 806<br>(41 429 – 62 991)          | 167-72 |
| Cote d'Ivoire               | 3-82<br>(3-27 – 4-54) | 3-95<br>(3-37 – 4-59) | 4-07<br>(3-46 – 4-93) | 4-09<br>(3-52 – 4-81) | 4-15<br>(3-55 – 4-86) | 4-26<br>(3-65 – 4-99) | 0-42<br>(0-15 – 0-71)     | 88 637<br>(73 413 – 105 785)         | 113-5  |
| The Gambia                  | 4-44<br>(4-23 – 4-66) | 4-45<br>(4-22 – 4-69) | 5-12<br>(4-35 – 6-02) | 5-23<br>(4-47 – 6-1)  | 5-39<br>(4-62 – 6-54) | 5-48<br>(4-65 – 6-4)  | 0-8<br>(0-24 – 1-34)      | 9936<br>(8271 – 11 797)              | 170-81 |
| Ghana                       | 4-12<br>(3-77 – 4-49) | 4-63<br>(4-29 – 4-93) | 4-32<br>(4-04 – 4-6)  | 3-96<br>(3-62 – 4-32) | 3-99<br>(3-56 – 4-43) | 4-56<br>(4-25 – 4-87) | 0-39<br>(0-21 – 0-59)     | 116 445<br>(106 959 – 125 550)       | 121-99 |
| Guinea                      | 3-63<br>(3-11 – 4-28) | 3-67<br>(3-12 – 4-34) | 3-76<br>(3-17 – 4-5)  | 3-77<br>(3-2 – 4-45)  | 3-87<br>(3-35 – 4-62) | 3-96<br>(3-36 – 4-68) | 0-33<br>(0-07 – 0-56)     | 45 983<br>(38 444 – 55 143)          | 136-79 |
| Guinea-Bissau               | 3-63<br>(3-12 – 4-24) | 3-7<br>(3-14 – 4-39)  | 3-77<br>(3-22 – 4-4)  | 3-82<br>(3-27 – 4-49) | 3-92<br>(3-36 – 4-74) | 4-01<br>(3-44 – 4-7)  | 0-38<br>(0-13 – 0-66)     | 6941<br>(5836 – 8290)                | 102-81 |
| Liberia                     | 3-64<br>(3-08 – 4-35) | 3-58<br>(3-05 – 4-21) | 3-61<br>(3-05 – 4-23) | 3-75<br>(3-19 – 4-42) | 3-87<br>(3-32 – 4-57) | 4-01<br>(3-41 – 4-73) | 0-37<br>(0-13 – 0-61)     | 16 695<br>(14 030 – 20 087)          | 137-49 |
| Mali                        | 3-07<br>(2-61 – 3-57) | 3-12<br>(2-66 – 3-71) | 3-18<br>(2-71 – 3-76) | 3-24<br>(2-77 – 3-8)  | 3-33<br>(2-85 – 3-91) | 3-06<br>(2-79 – 3-36) | -0-02<br>(-0-44 – 0-39)   | 47 373<br>(42 007 – 53 072)          | 102-1  |
| Mauritania                  | 3-98<br>(3-41 – 4-72) | 4-09<br>(3-46 – 4-82) | 4-18<br>(3-52 – 4-85) | 4-25<br>(3-64 – 5-01) | 4-38<br>(3-75 – 5-1)  | 4-54<br>(3-86 – 5-36) | 0-51<br>(0-23 – 0-78)     | 16 777<br>(13 939 – 20 236)          | 138-43 |
| Niger                       | 3-23<br>(2-77 – 3-8)  | 3-25<br>(2-76 – 3-86) | 3-24<br>(2-75 – 3-8)  | 3-29<br>(2-81 – 3-88) | 3-05<br>(2-75 – 3-34) | 3-4<br>(2-87 – 4-04)  | 0-2<br>(-0-04 – 0-49)     | 61 251<br>(50 092 – 75 861)          | 169-74 |
| Nigeria                     | 3-59<br>(3-05 – 4-18) | 3-62<br>(3-08 – 4-29) | 3-02<br>(2-69 – 3-41) | 3-42<br>(3-15 – 3-7)  | 3-67<br>(3-32 – 4-04) | 4-1<br>(3-47 – 4-88)  | 0-51<br>(0-24 – 0-76)     | 677 695<br>(557 771 – 820 354)       | 123-55 |
| Sao Tome and Principe       | 3-88<br>(3-34 – 4-68) | 3-97<br>(3-41 – 4-7)  | 4-06<br>(3-46 – 4-76) | 4-14<br>(3-52 – 4-81) | 4-24<br>(3-64 – 4-98) | 4-36<br>(3-69 – 5-18) | 0-45<br>(0-15 – 0-72)     | 775<br>(647 – 944)                   | 94-1   |
| Senegal                     | 3-74<br>(3-19 – 4-4)  | 3-82<br>(3-22 – 4-52) | 3-9<br>(3-34 – 4-54)  | 3-95<br>(3-39 – 4-6)  | 4-01<br>(3-39 – 4-76) | 4-08<br>(3-48 – 4-81) | 0-34<br>(0-01 – 0-6)      | 56 790<br>(48 057 – 67 435)          | 129-77 |
| Sierra Leone                | 6-66<br>(5-67 – 7-88) | 6-77<br>(5-78 – 8-24) | 6-13<br>(5-73 – 6-56) | 6-14<br>(5-83 – 6-44) | 6-41<br>(5-96 – 6-84) | 7-43<br>(6-39 – 8-74) | 0-42<br>(0-13 – 0-71)     | 44 206<br>(36 773 – 54 504)          | 90-25  |
| Togo                        | 3-72<br>(3-16 – 4-33) | 3-88<br>(3-26 – 4-74) | 3-96<br>(3-36 – 4-7)  | 4-03<br>(3-41 – 4-82) | 4-13<br>(3-52 – 4-86) | 4-23<br>(3-63 – 4-95) | 0-49<br>(0-21 – 0-75)     | 28 110<br>(23 676 – 34 006)          | 125-7  |

**Table S11. Global, GBD super-region, regional, and national age-standardised outpatient utilisation rates and annualised rate of change 1990 to 2016, and volume of inpatient admissions in 2016, and percentage change in volume from 1990 to 2016, both sexes combined**

Table displays four sets of results: age-standardised inpatient utilisation rate per person defined as the number of inpatient admissions per person per year, the annualised rate of change in the age-standardised inpatient utilisation rate, volume of inpatient admissions in 2016, and the percentage change in volume from 1990 to 2016. For each result, the mean of 1,000 draws is reported, and in parenthesis the uncertainty interval defined as the 2.5<sup>th</sup> and 97.5<sup>th</sup> percentile of draws. GBD= Global Burden of Disease.

**Table S11: Global, GBD super-region, regional, and national age-standardised inpatient utilisation rates and annualised rate of change 1990 to 2016, and volume of inpatient admissions in 2016, and percentage change in volume from 1990 to 2016, both sexes combined**

|                                                  | Age standardised for international comparisons           |                       |                       |                       |                       |                       | Estimates based on national age structure                      |                                                        |                                    |
|--------------------------------------------------|----------------------------------------------------------|-----------------------|-----------------------|-----------------------|-----------------------|-----------------------|----------------------------------------------------------------|--------------------------------------------------------|------------------------------------|
|                                                  | Age standardised inpatient utilisation rate (per capita) |                       |                       |                       |                       |                       | Annual rate of change in age-standardised rate (as percentage) | Volume of inpatient admissions per year (in thousands) | Total percentage change (Figure 3) |
|                                                  | 1990                                                     | 1995                  | 2000                  | 2005                  | 2010                  | 2016 (Figure 1b)      |                                                                |                                                        |                                    |
| Global                                           | 0.09<br>(0.08 – 0.1)                                     | 0.08<br>(0.07 – 0.09) | 0.08<br>(0.08 – 0.09) | 0.09<br>(0.08 – 0.09) | 0.09<br>(0.08 – 0.09) | 0.1<br>(0.09 – 0.11)  | 0.38<br>(0.24 – 0.5)                                           | 709 219<br>(652 249 – 774 259)                         | 67.96                              |
| Central Europe, Eastern Europe, and Central Asia | 0.21<br>(0.2 – 0.22)                                     | 0.19<br>(0.18 – 0.2)  | 0.19<br>(0.18 – 0.19) | 0.19<br>(0.19 – 0.2)  | 0.19<br>(0.19 – 0.2)  | 0.19<br>(0.19 – 0.2)  | -0.32<br>(-0.4 to -0.24)                                       | 83 247<br>(79 597 – 87 098)                            | -4.28                              |
| Central Asia                                     | 0.21<br>(0.2 – 0.23)                                     | 0.16<br>(0.15 – 0.16) | 0.13<br>(0.12 – 0.13) | 0.14<br>(0.13 – 0.14) | 0.15<br>(0.14 – 0.15) | 0.15<br>(0.14 – 0.15) | -1.4<br>(-1.61 to -1.2)                                        | 12 501<br>(12 005 – 13 036)                            | -9                                 |
| Armenia                                          | 0.13<br>(0.13 – 0.13)                                    | 0.09<br>(0.09 – 0.1)  | 0.07<br>(0.07 – 0.08) | 0.08<br>(0.08 – 0.08) | 0.11<br>(0.11 – 0.11) | 0.13<br>(0.12 – 0.13) | -0.11<br>(-0.22 to -0.01)                                      | 400<br>(384 – 418)                                     | -10.84                             |
| Azerbaijan                                       | 0.15<br>(0.14 – 0.15)                                    | 0.09<br>(0.08 – 0.09) | 0.05<br>(0.05 – 0.06) | 0.06<br>(0.06 – 0.06) | 0.06<br>(0.06 – 0.06) | 0.06<br>(0.06 – 0.07) | -3.02<br>(-3.11 to -2.93)                                      | 650<br>(626 – 675)                                     | -34.53                             |
| Georgia                                          | 0.12<br>(0.12 – 0.13)                                    | 0.06<br>(0.06 – 0.07) | 0.05<br>(0.05 – 0.05) | 0.05<br>(0.05 – 0.06) | 0.07<br>(0.07 – 0.07) | 0.09<br>(0.08 – 0.09) | -1.29<br>(-1.39 to -1.19)                                      | 376<br>(361 – 392)                                     | -44.24                             |
| Kazakhstan                                       | 0.25<br>(0.24 – 0.25)                                    | 0.19<br>(0.18 – 0.19) | 0.16<br>(0.15 – 0.16) | 0.17<br>(0.17 – 0.18) | 0.17<br>(0.17 – 0.17) | 0.16<br>(0.15 – 0.16) | -1.77<br>(-1.87 to -1.67)                                      | 2759<br>(2650 – 2862)                                  | -30.34                             |
| Kyrgyzstan                                       | 0.26<br>(0.25 – 0.26)                                    | 0.18<br>(0.17 – 0.19) | 0.15<br>(0.15 – 0.16) | 0.15<br>(0.15 – 0.15) | 0.16<br>(0.16 – 0.17) | 0.16<br>(0.15 – 0.16) | -1.87<br>(-1.98 to -1.76)                                      | 894<br>(857 – 929)                                     | -11.35                             |
| Mongolia                                         | 0.17<br>(0.15 – 0.21)                                    | 0.17<br>(0.14 – 0.2)  | 0.16<br>(0.14 – 0.19) | 0.16<br>(0.13 – 0.19) | 0.16<br>(0.13 – 0.19) | 0.16<br>(0.13 – 0.19) | -0.34<br>(-0.73 – 0.07)                                        | 461<br>(381 – 562)                                     | 30.67                              |
| Tajikistan                                       | 0.22<br>(0.22 – 0.23)                                    | 0.16<br>(0.15 – 0.16) | 0.11<br>(0.11 – 0.12) | 0.13<br>(0.12 – 0.14) | 0.14<br>(0.14 – 0.15) | 0.14<br>(0.13 – 0.14) | -1.88<br>(-1.97 to -1.78)                                      | 1064<br>(1024 – 1108)                                  | -1.18                              |
| Turkmenistan                                     | 0.17<br>(0.15 – 0.21)                                    | 0.17<br>(0.14 – 0.2)  | 0.16<br>(0.14 – 0.19) | 0.16<br>(0.13 – 0.19) | 0.15<br>(0.13 – 0.18) | 0.15<br>(0.13 – 0.18) | -0.48<br>(-0.87 to -0.1)                                       | 801<br>(663 – 977)                                     | 34.04                              |
| Uzbekistan                                       | 0.24<br>(0.2 – 0.29)                                     | 0.18<br>(0.18 – 0.19) | 0.15<br>(0.15 – 0.16) | 0.16<br>(0.16 – 0.17) | 0.17<br>(0.17 – 0.18) | 0.18<br>(0.17 – 0.18) | -1.18<br>(-1.86 to -0.59)                                      | 5097<br>(4902 – 5291)                                  | 10.17                              |
| Central Europe                                   | 0.17<br>(0.16 – 0.18)                                    | 0.17<br>(0.16 – 0.17) | 0.17<br>(0.16 – 0.17) | 0.17<br>(0.16 – 0.17) | 0.17<br>(0.16 – 0.17) | 0.18<br>(0.17 – 0.2)  | 0.29<br>(0.16 – 0.41)                                          | 22 459<br>(21 089 – 24 010)                            | 8.13                               |
| Albania                                          | 0.1<br>(0.09 – 0.11)                                     | 0.09<br>(0.09 – 0.09) | 0.09<br>(0.09 – 0.09) | 0.09<br>(0.09 – 0.09) | 0.09<br>(0.09 – 0.1)  | 0.09<br>(0.09 – 0.1)  | -0.17<br>(-0.37 – 0.02)                                        | 268<br>(251 – 285)                                     | -15.31                             |
| Bosnia and Herzegovina                           | 0.12<br>(0.1 – 0.14)                                     | 0.11<br>(0.1 – 0.13)  | 0.09<br>(0.08 – 0.1)  | 0.1<br>(0.09 – 0.12)  | 0.11<br>(0.09 – 0.13) | 0.11<br>(0.09 – 0.13) | -0.12<br>(-0.51 – 0.21)                                        | 440<br>(368 – 519)                                     | -11                                |
| Bulgaria                                         | 0.2<br>(0.19 – 0.21)                                     | 0.18<br>(0.17 – 0.18) | 0.15<br>(0.15 – 0.16) | 0.17<br>(0.16 – 0.17) | 0.21<br>(0.2 – 0.22)  | 0.27<br>(0.26 – 0.28) | 1.18<br>(1.03 – 1.33)                                          | 2120<br>(1999 – 2238)                                  | 21.48                              |
| Croatia                                          | 0.14<br>(0.14 – 0.15)                                    | 0.14<br>(0.13 – 0.14) | 0.14<br>(0.14 – 0.15) | 0.15<br>(0.15 – 0.15) | 0.16<br>(0.15 – 0.16) | 0.17<br>(0.16 – 0.17) | 0.55<br>(0.44 – 0.67)                                          | 767<br>(730 – 804)                                     | 13.33                              |
| Czech Republic                                   | 0.27<br>(0.23 – 0.31)                                    | 0.22<br>(0.2 – 0.25)  | 0.2<br>(0.19 – 0.2)   | 0.19<br>(0.19 – 0.19) | 0.18<br>(0.18 – 0.19) | 0.18<br>(0.2 – 0.28)  | -0.5<br>(-0.99 to -0.07)                                       | 2643<br>(2311 – 3092)                                  | -3.69                              |
| Hungary                                          | 0.22<br>(0.21 – 0.23)                                    | 0.22<br>(0.21 – 0.23) | 0.22<br>(0.22 – 0.22) | 0.2<br>(0.2 – 0.21)   | 0.18<br>(0.18 – 0.18) | 0.2<br>(0.19 – 0.21)  | -0.42<br>(-0.56 to -0.29)                                      | 2089<br>(1974 – 2217)                                  | -9.18                              |
| Macedonia                                        | 0.11<br>(0.1 – 0.11)                                     | 0.1<br>(0.1 – 0.11)   | 0.1<br>(0.1 – 0.11)   | 0.1<br>(0.1 – 0.11)   | 0.12<br>(0.11 – 0.13) | 0.12<br>(0.11 – 0.13) | 0.63<br>(0.37 – 0.92)                                          | 254<br>(234 – 275)                                     | 27.26                              |
| Montenegro                                       | 0.14<br>(0.12 – 0.17)                                    | 0.14<br>(0.12 – 0.17) | 0.14<br>(0.12 – 0.17) | 0.11<br>(0.1 – 0.11)  | 0.11<br>(0.11 – 0.12) | 0.12<br>(0.11 – 0.13) | -0.74<br>(-1.3 to -0.15)                                       | 76<br>(72 – 80)                                        | -11.58                             |
| Poland                                           | 0.13<br>(0.12 – 0.13)                                    | 0.14<br>(0.13 – 0.14) | 0.15<br>(0.15 – 0.16) | 0.15<br>(0.15 – 0.15) | 0.15<br>(0.15 – 0.15) | 0.17<br>(0.16 – 0.17) | 1.0<br>(0.81 – 1.17)                                           | 6627<br>(6217 – 7019)                                  | 39.23                              |
| Romania                                          | 0.21<br>(0.21 – 0.22)                                    | 0.21<br>(0.2 – 0.21)  | 0.22<br>(0.22 – 0.23) | 0.23<br>(0.23 – 0.24) | 0.22<br>(0.21 – 0.23) | 0.22<br>(0.21 – 0.24) | 0.14<br>(-0.11 – 0.43)                                         | 4572<br>(4231 – 4968)                                  | -8.38                              |
| Serbia                                           | 0.13<br>(0.11 – 0.15)                                    | 0.13<br>(0.11 – 0.15) | 0.09<br>(0.07 – 0.1)  | 0.08<br>(0.07 – 0.09) | 0.11<br>(0.11 – 0.12) | 0.12<br>(0.11 – 0.12) | -0.42<br>(-0.96 – 0.17)                                        | 1096<br>(1041 – 1155)                                  | -10.32                             |
| Slovakia                                         | 0.18<br>(0.17 – 0.18)                                    | 0.2<br>(0.19 – 0.2)   | 0.2<br>(0.2 – 0.21)   | 0.19<br>(0.19 – 0.2)  | 0.19<br>(0.19 – 0.2)  | 0.2<br>(0.19 – 0.21)  | 0.48<br>(0.3 – 0.66)                                           | 1121<br>(1056 – 1190)                                  | 22.43                              |
| Slovenia                                         | 0.16<br>(0.16 – 0.17)                                    | 0.16<br>(0.16 – 0.17) | 0.17<br>(0.16 – 0.17) | 0.17<br>(0.16 – 0.17) | 0.16<br>(0.16 – 0.16) | 0.18<br>(0.17 – 0.19) | 0.37<br>(0.2 – 0.55)                                           | 386<br>(365 – 407)                                     | 20.69                              |
| Eastern Europe                                   | 0.24<br>(0.23 – 0.25)                                    | 0.22<br>(0.21 – 0.23) | 0.22<br>(0.21 – 0.23) | 0.23<br>(0.22 – 0.24) | 0.23<br>(0.22 – 0.24) | 0.23<br>(0.22 – 0.24) | -0.24<br>(-0.35 to -0.12)                                      | 48 288<br>(46 312 – 50 290)                            | -7.96                              |
| Belarus                                          | 0.27<br>(0.22 – 0.32)                                    | 0.26<br>(0.22 – 0.31) | 0.26<br>(0.22 – 0.31) | 0.26<br>(0.21 – 0.3)  | 0.23<br>(0.2 – 0.27)  | 0.25<br>(0.21 – 0.3)  | -0.2<br>(-0.48 – 0.09)                                         | 2411<br>(2022 – 2863)                                  | -10.21                             |
| Estonia                                          | 0.2<br>(0.19 – 0.21)                                     | 0.2<br>(0.19 – 0.2)   | 0.2<br>(0.2 – 0.21)   | 0.2<br>(0.19 – 0.2)   | 0.19<br>(0.18 – 0.19) | 0.18<br>(0.17 – 0.19) | -0.33<br>(-0.47 to -0.19)                                      | 246<br>(236 – 255)                                     | -21.01                             |
| Latvia                                           | 0.24<br>(0.23 – 0.24)                                    | 0.22<br>(0.21 – 0.22) | 0.22<br>(0.22 – 0.22) | 0.21<br>(0.21 – 0.21) | 0.2<br>(0.19 – 0.2)   | 0.18<br>(0.18 – 0.19) | -0.98<br>(-1.07 to -0.9)                                       | 384<br>(372 – 398)                                     | -38.21                             |
| Lithuania                                        | 0.21<br>(0.2 – 0.21)                                     | 0.23<br>(0.22 – 0.24) | 0.23<br>(0.22 – 0.23) | 0.22<br>(0.21 – 0.22) | 0.22<br>(0.21 – 0.22) | 0.24<br>(0.22 – 0.25) | 0.53<br>(0.33 – 0.73)                                          | 743<br>(698 – 794)                                     | -1.79                              |
| Moldova                                          | 0.24<br>(0.23 – 0.25)                                    | 0.21<br>(0.21 – 0.22) | 0.17<br>(0.16 – 0.17) | 0.15<br>(0.15 – 0.16) | 0.17<br>(0.16 – 0.17) | 0.17<br>(0.17 – 0.18) | -1.25<br>(-1.38 to -1.13)                                      | 676<br>(645 – 707)                                     | -35.48                             |

|                           |                       |                       |                       |                       |                       |                       |                           |                                |        |
|---------------------------|-----------------------|-----------------------|-----------------------|-----------------------|-----------------------|-----------------------|---------------------------|--------------------------------|--------|
| Russia                    | 0-23<br>(0-23 - 0-24) | 0-22<br>(0-21 - 0-23) | 0-23<br>(0-22 - 0-24) | 0-24<br>(0-23 - 0-25) | 0-23<br>(0-22 - 0-24) | 0-22<br>(0-21 - 0-23) | -0-17<br>(-0-3 to -0-04)  | 33 170<br>(31 916 - 34 357)    | -2-35  |
| Ukraine                   | 0-26<br>(0-25 - 0-26) | 0-22<br>(0-22 - 0-23) | 0-2<br>(0-2 - 0-21)   | 0-22<br>(0-22 - 0-23) | 0-23<br>(0-23 - 0-24) | 0-24<br>(0-22 - 0-25) | -0-33<br>(-0-49 to -0-17) | 10 657<br>(10 088 - 11 214)    | -18-45 |
| High-income               | 0-14<br>(0-13 - 0-16) | 0-13<br>(0-12 - 0-15) | 0-13<br>(0-12 - 0-14) | 0-13<br>(0-12 - 0-13) | 0-12<br>(0-12 - 0-13) | 0-13<br>(0-12 - 0-14) | -0-35<br>(-0-5 to -0-21)  | 152 621<br>(141 609 - 164 276) | 16-74  |
| Australasia               | 0-18<br>(0-15 - 0-21) | 0-15<br>(0-13 - 0-17) | 0-16<br>(0-14 - 0-18) | 0-15<br>(0-14 - 0-16) | 0-16<br>(0-16 - 0-17) | 0-16<br>(0-15 - 0-18) | -0-31<br>(-0-76 - 0-11)   | 4807<br>(4412 - 5203)          | 36-18  |
| Australia                 | 0-17<br>(0-15 - 0-2)  | 0-14<br>(0-12 - 0-16) | 0-16<br>(0-13 - 0-18) | 0-15<br>(0-14 - 0-16) | 0-16<br>(0-16 - 0-17) | 0-16<br>(0-15 - 0-18) | -0-2<br>(-0-65 - 0-23)    | 4096<br>(3716 - 4477)          | 41-42  |
| New Zealand               | 0-19<br>(0-16 - 0-22) | 0-18<br>(0-16 - 0-22) | 0-15<br>(0-15 - 0-16) | 0-15<br>(0-14 - 0-15) | 0-15<br>(0-15 - 0-15) | 0-15<br>(0-15 - 0-16) | -0-83<br>(-1-44 to -0-25) | 712<br>(686 - 738)             | 12-22  |
| High-income Asia-Pacific  | 0-1<br>(0-09 - 0-12)  | 0-09<br>(0-08 - 0-1)  | 0-1<br>(0-09 - 0-11)  | 0-11<br>(0-1 - 0-12)  | 0-12<br>(0-1 - 0-13)  | 0-12<br>(0-11 - 0-14) | 0-69<br>(0-46 - 0-93)     | 23 322<br>(20 565 - 26 427)    | 42-27  |
| Brunei                    | 0-12<br>(0-1 - 0-14)  | 0-12<br>(0-1 - 0-14)  | 0-12<br>(0-1 - 0-14)  | 0-12<br>(0-1 - 0-14)  | 0-12<br>(0-1 - 0-14)  | 0-12<br>(0-1 - 0-14)  | 0-15<br>(-0-22 - 0-54)    | 47<br>(39 - 56)                | 61-57  |
| Japan                     | 0-08<br>(0-07 - 0-1)  | 0-09<br>(0-07 - 0-1)  | 0-1<br>(0-08 - 0-12)  | 0-1<br>(0-08 - 0-12)  | 0-1<br>(0-09 - 0-12)  | 0-1<br>(0-09 - 0-12)  | 0-99<br>(0-74 - 1-23)     | 14 500<br>(12 051 - 17 312)    | 50-59  |
| Singapore                 | 0-12<br>(0-1 - 0-15)  | 0-12<br>(0-1 - 0-15)  | 0-12<br>(0-1 - 0-14)  | 0-12<br>(0-1 - 0-15)  | 0-12<br>(0-1 - 0-14)  | 0-12<br>(0-1 - 0-15)  | 0-01<br>(-0-33 - 0-34)    | 459<br>(385 - 538)             | 44-63  |
| South Korea               | 0-16<br>(0-14 - 0-19) | 0-09<br>(0-09 - 0-1)  | 0-1<br>(0-1 - 0-11)   | 0-12<br>(0-12 - 0-13) | 0-16<br>(0-15 - 0-16) | 0-17<br>(0-16 - 0-18) | 0-18<br>(-0-44 - 0-79)    | 8316<br>(7836 - 8824)          | 29-58  |
| High-income North America | 0-14<br>(0-12 - 0-16) | 0-13<br>(0-11 - 0-16) | 0-12<br>(0-11 - 0-14) | 0-12<br>(0-11 - 0-13) | 0-11<br>(0-1 - 0-12)  | 0-11<br>(0-1 - 0-12)  | -0-89<br>(-1-28 to -0-51) | 44 246<br>(40 504 - 48 103)    | 8-54   |
| Canada                    | 0-13<br>(0-11 - 0-15) | 0-12<br>(0-11 - 0-15) | 0-11<br>(0-1 - 0-12)  | 0-11<br>(0-1 - 0-12)  | 0-1<br>(0-09 - 0-1)   | 0-12<br>(0-1 - 0-14)  | -0-39<br>(-0-71 to -0-08) | 4999<br>(4175 - 5905)          | 36-27  |
| Greenland                 | 0-14<br>(0-11 - 0-16) | 0-13<br>(0-11 - 0-16) | 0-13<br>(0-11 - 0-15) | 0-13<br>(0-11 - 0-15) | 0-13<br>(0-11 - 0-15) | 0-13<br>(0-11 - 0-15) | -0-1<br>(-0-38 - 0-2)     | 6<br>(5 - 8)                   | 6-89   |
| United States             | 0-14<br>(0-12 - 0-17) | 0-13<br>(0-11 - 0-16) | 0-12<br>(0-11 - 0-14) | 0-12<br>(0-11 - 0-13) | 0-11<br>(0-1 - 0-12)  | 0-11<br>(0-1 - 0-12)  | -0-95<br>(-1-39 to -0-52) | 39 225<br>(36 277 - 42 441)    | 5-81   |
| Southern Latin America    | 0-09<br>(0-08 - 0-11) | 0-09<br>(0-08 - 0-1)  | 0-09<br>(0-08 - 0-1)  | 0-09<br>(0-08 - 0-1)  | 0-09<br>(0-08 - 0-1)  | 0-09<br>(0-08 - 0-1)  | -0-23<br>(-0-48 - 0-04)   | 5802<br>(5034 - 6684)          | 33-15  |
| Argentina                 | 0-09<br>(0-08 - 0-11) | 0-09<br>(0-08 - 0-11) | 0-09<br>(0-08 - 0-11) | 0-09<br>(0-08 - 0-11) | 0-09<br>(0-08 - 0-11) | 0-09<br>(0-08 - 0-11) | -0-04<br>(-0-38 - 0-33)   | 3990<br>(3396 - 4669)          | 38-29  |
| Chile                     | 0-11<br>(0-1 - 0-12)  | 0-1<br>(0-1 - 0-11)   | 0-1<br>(0-1 - 0-1)    | 0-1<br>(0-1 - 0-1)    | 0-09<br>(0-09 - 0-09) | 0-09<br>(0-08 - 0-1)  | -0-84<br>(-1-12 to -0-59) | 1601<br>(1427 - 1799)          | 25-52  |
| Uruguay                   | 0-06<br>(0-05 - 0-08) | 0-06<br>(0-05 - 0-07) | 0-06<br>(0-05 - 0-07) | 0-06<br>(0-05 - 0-07) | 0-06<br>(0-05 - 0-07) | 0-06<br>(0-05 - 0-07) | -0-32<br>(-0-62 - 0-04)   | 211<br>(182 - 250)             | 7-24   |
| Western Europe            | 0-16<br>(0-16 - 0-17) | 0-16<br>(0-16 - 0-17) | 0-15<br>(0-15 - 0-16) | 0-15<br>(0-14 - 0-15) | 0-14<br>(0-14 - 0-15) | 0-15<br>(0-14 - 0-17) | -0-22<br>(-0-34 to -0-1)  | 74 445<br>(70 227 - 78 993)    | 13-32  |
| Andorra                   | 0-15<br>(0-13 - 0-18) | 0-15<br>(0-13 - 0-18) | 0-15<br>(0-13 - 0-18) | 0-15<br>(0-13 - 0-18) | 0-15<br>(0-13 - 0-18) | 0-15<br>(0-13 - 0-18) | -0-08<br>(-0-43 - 0-29)   | 14<br>(11 - 16)                | 70-32  |
| Austria                   | 0-2<br>(0-2 - 0-2)    | 0-21<br>(0-21 - 0-22) | 0-22<br>(0-22 - 0-23) | 0-23<br>(0-22 - 0-23) | 0-22<br>(0-22 - 0-22) | 0-25<br>(0-24 - 0-26) | 0-82<br>(0-6 - 1-02)      | 2355<br>(2243 - 2470)          | 37-81  |
| Belgium                   | 0-19<br>(0-16 - 0-23) | 0-19<br>(0-16 - 0-22) | 0-14<br>(0-14 - 0-14) | 0-14<br>(0-14 - 0-14) | 0-14<br>(0-14 - 0-15) | 0-15<br>(0-14 - 0-16) | -0-87<br>(-1-47 to -0-28) | 1999<br>(1884 - 2125)          | -1-35  |
| Cyprus                    | 0-11<br>(0-09 - 0-12) | 0-1<br>(0-09 - 0-12)  | 0-1<br>(0-09 - 0-12)  | 0-1<br>(0-08 - 0-12)  | 0-08<br>(0-07 - 0-09) | 0-1<br>(0-08 - 0-12)  | -0-25<br>(-0-6 - 0-08)    | 95<br>(79 - 112)               | 35-24  |
| Denmark                   | 0-19<br>(0-18 - 0-19) | 0-18<br>(0-18 - 0-19) | 0-16<br>(0-16 - 0-17) | 0-15<br>(0-14 - 0-15) | 0-14<br>(0-14 - 0-15) | 0-14<br>(0-14 - 0-15) | -1-04<br>(-1-18 to -0-89) | 905<br>(864 - 948)             | -12-95 |
| Finland                   | 0-22<br>(0-21 - 0-23) | 0-22<br>(0-21 - 0-23) | 0-18<br>(0-17 - 0-18) | 0-15<br>(0-15 - 0-15) | 0-13<br>(0-13 - 0-14) | 0-15<br>(0-14 - 0-16) | -1-42<br>(-1-59 to -1-25) | 981<br>(921 - 1046)            | -14-57 |
| France                    | 0-22<br>(0-21 - 0-22) | 0-22<br>(0-21 - 0-22) | 0-2<br>(0-19 - 0-2)   | 0-18<br>(0-17 - 0-18) | 0-17<br>(0-17 - 0-18) | 0-18<br>(0-17 - 0-19) | -0-74<br>(-0-99 to -0-47) | 13 053<br>(12 235 - 14 041)    | 0-36   |
| Germany                   | 0-18<br>(0-18 - 0-19) | 0-2<br>(0-19 - 0-2)   | 0-19<br>(0-19 - 0-2)  | 0-19<br>(0-19 - 0-19) | 0-2<br>(0-19 - 0-2)   | 0-23<br>(0-22 - 0-24) | 0-84<br>(0-68 - 0-99)     | 21 120<br>(20 189 - 22 079)    | 37-2   |
| Greece                    | 0-12<br>(0-12 - 0-13) | 0-13<br>(0-13 - 0-14) | 0-15<br>(0-14 - 0-15) | 0-16<br>(0-16 - 0-17) | 0-18<br>(0-17 - 0-18) | 0-17<br>(0-14 - 0-19) | 1-11<br>(0-47 - 1-73)     | 2134<br>(1759 - 2531)          | 63-32  |
| Iceland                   | 0-22<br>(0-21 - 0-23) | 0-21<br>(0-2 - 0-22)  | 0-18<br>(0-17 - 0-18) | 0-15<br>(0-14 - 0-16) | 0-13<br>(0-12 - 0-13) | 0-12<br>(0-11 - 0-13) | -2-29<br>(-2-42 to -2-16) | 43<br>(41 - 45)                | -23-03 |
| Ireland                   | 0-15<br>(0-14 - 0-15) | 0-15<br>(0-14 - 0-15) | 0-14<br>(0-14 - 0-14) | 0-13<br>(0-13 - 0-13) | 0-13<br>(0-12 - 0-13) | 0-14<br>(0-13 - 0-15) | -0-26<br>(-0-46 to -0-07) | 685<br>(643 - 730)             | 31-04  |
| Israel                    | 0-22<br>(0-18 - 0-26) | 0-2<br>(0-18 - 0-23)  | 0-18<br>(0-17 - 0-18) | 0-18<br>(0-17 - 0-18) | 0-16<br>(0-16 - 0-17) | 0-16<br>(0-16 - 0-17) | -1-06<br>(-1-65 to -0-49) | 1389<br>(1324 - 1453)          | 44-59  |
| Italy                     | 0-16<br>(0-15 - 0-16) | 0-16<br>(0-15 - 0-16) | 0-14<br>(0-13 - 0-14) | 0-12<br>(0-12 - 0-12) | 0-11<br>(0-11 - 0-11) | 0-11<br>(0-1 - 0-12)  | -1-3<br>(-1-54 to -1-04)  | 7972<br>(7373 - 8622)          | -14-73 |
| Luxembourg                | 0-19<br>(0-16 - 0-22) | 0-19<br>(0-16 - 0-22) | 0-15<br>(0-15 - 0-15) | 0-14<br>(0-14 - 0-14) | 0-13<br>(0-13 - 0-13) | 0-15<br>(0-14 - 0-16) | -0-94<br>(-1-51 to -0-33) | 91<br>(86 - 97)                | 22-24  |
| Malta                     | 0-13<br>(0-11 - 0-15) | 0-13<br>(0-11 - 0-15) | 0-12<br>(0-1 - 0-15)  | 0-09<br>(0-09 - 0-1)  | 0-11<br>(0-1 - 0-12)  | 0-12<br>(0-1 - 0-14)  | -0-21<br>(-0-57 - 0-11)   | 58<br>(48 - 70)                | 27-75  |
| Netherlands               | 0-1<br>(0-09 - 0-1)   | 0-1<br>(0-09 - 0-1)   | 0-09<br>(0-09 - 0-1)  | 0-09<br>(0-09 - 0-1)  | 0-1<br>(0-1 - 0-1)    | 0-11<br>(0-1 - 0-13)  | 0-57<br>(0-08 - 1-05)     | 2203<br>(1945 - 2493)          | 45-95  |
| Norway                    | 0-14<br>(0-14 - 0-15) | 0-14<br>(0-14 - 0-15) | 0-16<br>(0-15 - 0-16) | 0-17<br>(0-16 - 0-17) | 0-18<br>(0-17 - 0-18) | 0-18<br>(0-17 - 0-19) | 0-87<br>(0-73 - 1-02)     | 1042<br>(991 - 1096)           | 57-67  |
| Portugal                  | 0-09<br>(0-09 - 0-1)  | 0-1<br>(0-1 - 0-11)   | 0-11<br>(0-1 - 0-11)  | 0-11<br>(0-1 - 0-11)  | 0-1<br>(0-1 - 0-1)    | 0-1<br>(0-09 - 0-1)   | 0-1<br>(-0-03 - 0-24)     | 1184<br>(1116 - 1249)          | 21-35  |
| Spain                     | 0-1<br>(0-09 - 0-1)   | 0-1<br>(0-1 - 0-11)   | 0-11<br>(0-11 - 0-11) | 0-11<br>(0-11 - 0-11) | 0-1<br>(0-1 - 0-11)   | 0-1<br>(0-1 - 0-11)   | 0-3<br>(0-18 - 0-44)      | 5440<br>(5216 - 5660)          | 42-21  |
| Sweden                    | 0-17<br>(0-14 - 0-2)  | 0-16<br>(0-13 - 0-19) | 0-14<br>(0-12 - 0-17) | 0-13<br>(0-11 - 0-15) | 0-12<br>(0-11 - 0-15) | 0-13<br>(0-11 - 0-15) | -1-07<br>(-1-41 to -0-75) | 1412<br>(1193 - 1658)          | -11-26 |
| Switzerland               | 0-19<br>(0-16 - 0-22) | 0-17<br>(0-15 - 0-18) | 0-13<br>(0-13 - 0-14) | 0-13<br>(0-13 - 0-14) | 0-14<br>(0-14 - 0-14) | 0-16<br>(0-15 - 0-17) | -0-7<br>(-1-26 to -0-12)  | 1444<br>(1366 - 1522)          | 7-04   |

|                                  |                       |                       |                       |                       |                       |                       |                           |                             |        |
|----------------------------------|-----------------------|-----------------------|-----------------------|-----------------------|-----------------------|-----------------------|---------------------------|-----------------------------|--------|
| United Kingdom                   | 0-15<br>(0-12 - 0-17) | 0-13<br>(0-11 - 0-14) | 0-11<br>(0-1 - 0-13)  | 0-11<br>(0-1 - 0-13)  | 0-11<br>(0-1 - 0-13)  | 0-12<br>(0-11 - 0-14) | -0-7<br>(-0-87 to -0-52)  | 8752<br>(7572 - 10 072)     | -2-77  |
| Latin America and Caribbean      | 0-08<br>(0-07 - 0-1)  | 0-08<br>(0-07 - 0-1)  | 0-08<br>(0-07 - 0-09) | 0-08<br>(0-07 - 0-09) | 0-07<br>(0-06 - 0-08) | 0-07<br>(0-07 - 0-08) | -0-53<br>(-0-82 to -0-25) | 40 529<br>(35 914 - 46 741) | 32-59  |
| Andean Latin America             | 0-07<br>(0-06 - 0-08) | 0-07<br>(0-06 - 0-07) | 0-08<br>(0-07 - 0-08) | 0-06<br>(0-06 - 0-06) | 0-06<br>(0-06 - 0-07) | 0-07<br>(0-07 - 0-08) | 0-38<br>(0-15 - 0-62)     | 4235<br>(3790 - 4817)       | 83-29  |
| Bolivia                          | 0-07<br>(0-06 - 0-09) | 0-07<br>(0-06 - 0-09) | 0-07<br>(0-06 - 0-09) | 0-07<br>(0-06 - 0-09) | 0-07<br>(0-06 - 0-08) | 0-07<br>(0-06 - 0-09) | -0-08<br>(-0-47 - 0-29)   | 761<br>(645 - 917)          | 64-12  |
| Ecuador                          | 0-08<br>(0-07 - 0-1)  | 0-06<br>(0-06 - 0-06) | 0-06<br>(0-06 - 0-06) | 0-06<br>(0-06 - 0-06) | 0-07<br>(0-07 - 0-08) | 0-08<br>(0-08 - 0-08) | -0-16<br>(-0-85 - 0-51)   | 1241<br>(1209 - 1276)       | 60-75  |
| Peru                             | 0-06<br>(0-05 - 0-07) | 0-07<br>(0-06 - 0-08) | 0-08<br>(0-07 - 0-09) | 0-05<br>(0-05 - 0-05) | 0-06<br>(0-05 - 0-06) | 0-06<br>(0-06 - 0-08) | 0-07<br>(0-41 - 1-24)     | 2233<br>(1889 - 2655)       | 107-77 |
| Caribbean                        | 0-08<br>(0-07 - 0-09) | 0-08<br>(0-06 - 0-09) | 0-07<br>(0-06 - 0-09) | 0-08<br>(0-06 - 0-09) | 0-08<br>(0-07 - 0-09) | 0-08<br>(0-07 - 0-09) | -0-0<br>(-0-15 - 0-16)    | 3453<br>(2957 - 4080)       | 40-81  |
| Antigua and Barbuda              | 0-08<br>(0-07 - 0-09) | 0-08<br>(0-06 - 0-09) | 0-07<br>(0-06 - 0-09) | 0-07<br>(0-06 - 0-09) | 0-07<br>(0-06 - 0-08) | 0-07<br>(0-06 - 0-08) | -0-35<br>(-0-69 to -0-04) | 6<br>(5 - 7)                | 41-61  |
| The Bahamas                      | 0-1<br>(0-08 - 0-12)  | 0-1<br>(0-08 - 0-12)  | 0-08<br>(0-07 - 0-08) | 0-1<br>(0-08 - 0-11)  | 0-09<br>(0-08 - 0-11) | 0-1<br>(0-08 - 0-11)  | -0-19<br>(-0-53 - 0-2)    | 38<br>(31 - 46)             | 70-35  |
| Barbados                         | 0-1<br>(0-09 - 0-12)  | 0-1<br>(0-09 - 0-12)  | 0-1<br>(0-09 - 0-12)  | 0-1<br>(0-09 - 0-12)  | 0-11<br>(0-09 - 0-12) | 0-1<br>(0-09 - 0-12)  | -0-03<br>(-0-4 - 0-31)    | 33<br>(27 - 39)             | 22-44  |
| Belize                           | 0-07<br>(0-06 - 0-09) | 0-07<br>(0-06 - 0-08) | 0-07<br>(0-06 - 0-08) | 0-06<br>(0-05 - 0-08) | 0-06<br>(0-05 - 0-07) | 0-06<br>(0-05 - 0-08) | -0-49<br>(-0-75 to -0-13) | 20<br>(17 - 25)             | 72-41  |
| Bermuda                          | 0-08<br>(0-07 - 0-1)  | 0-08<br>(0-07 - 0-1)  | 0-08<br>(0-07 - 0-1)  | 0-08<br>(0-07 - 0-1)  | 0-08<br>(0-07 - 0-1)  | 0-08<br>(0-07 - 0-1)  | 0-02<br>(-0-29 - 0-35)    | 6<br>(5 - 7)                | 46-31  |
| Cuba                             | 0-08<br>(0-07 - 0-1)  | 0-08<br>(0-07 - 0-1)  | 0-08<br>(0-07 - 0-1)  | 0-08<br>(0-07 - 0-1)  | 0-08<br>(0-07 - 0-1)  | 0-08<br>(0-07 - 0-1)  | -0-03<br>(-0-34 - 0-33)   | 1036<br>(868 - 1229)        | 25-14  |
| Dominica                         | 0-07<br>(0-06 - 0-09) | 0-07<br>(0-06 - 0-09) | 0-08<br>(0-06 - 0-09) | 0-08<br>(0-06 - 0-09) | 0-08<br>(0-06 - 0-09) | 0-08<br>(0-06 - 0-09) | 0-14<br>(-0-17 - 0-43)    | 6<br>(5 - 7)                | 22-9   |
| Dominican Republic               | 0-1<br>(0-08 - 0-11)  | 0-1<br>(0-08 - 0-11)  | 0-09<br>(0-08 - 0-1)  | 0-09<br>(0-08 - 0-1)  | 0-09<br>(0-08 - 0-11) | 0-09<br>(0-08 - 0-11) | -0-1<br>(-0-44 - 0-23)    | 921<br>(779 - 1100)         | 58-9   |
| Grenada                          | 0-08<br>(0-07 - 0-1)  | 0-08<br>(0-07 - 0-1)  | 0-08<br>(0-07 - 0-09) | 0-08<br>(0-07 - 0-09) | 0-08<br>(0-07 - 0-09) | 0-08<br>(0-06 - 0-09) | -0-29<br>(-0-61 - 0-04)   | 8<br>(6 - 9)                | 4-44   |
| Guyana                           | 0-05<br>(0-04 - 0-06) | 0-05<br>(0-04 - 0-06) | 0-05<br>(0-04 - 0-06) | 0-05<br>(0-04 - 0-06) | 0-05<br>(0-04 - 0-06) | 0-05<br>(0-04 - 0-06) | -0-06<br>(-0-43 - 0-25)   | 33<br>(28 - 40)             | 10-7   |
| Haiti                            | 0-06<br>(0-05 - 0-07) | 0-06<br>(0-05 - 0-07) | 0-06<br>(0-05 - 0-07) | 0-06<br>(0-05 - 0-07) | 0-06<br>(0-05 - 0-07) | 0-06<br>(0-05 - 0-07) | 0-27<br>(-0-04 - 0-62)    | 600<br>(507 - 728)          | 72-98  |
| Jamaica                          | 0-03<br>(0-02 - 0-03) | 0-03<br>(0-02 - 0-03) | 0-03<br>(0-02 - 0-03) | 0-03<br>(0-02 - 0-04) | 0-03<br>(0-02 - 0-04) | 0-03<br>(0-02 - 0-04) | 0-29<br>(-0-04 - 0-62)    | 84<br>(70 - 99)             | 42-76  |
| Puerto Rico                      | 0-08<br>(0-06 - 0-09) | 0-07<br>(0-06 - 0-09) | 0-07<br>(0-06 - 0-09) | 0-08<br>(0-06 - 0-09) | 0-08<br>(0-06 - 0-09) | 0-08<br>(0-06 - 0-09) | -0-01<br>(-0-36 - 0-36)   | 304<br>(254 - 361)          | 17-32  |
| Saint Lucia                      | 0-08<br>(0-06 - 0-09) | 0-07<br>(0-06 - 0-09) | 0-07<br>(0-06 - 0-09) | 0-07<br>(0-06 - 0-08) | 0-07<br>(0-06 - 0-08) | 0-07<br>(0-06 - 0-08) | -0-27<br>(-0-6 - 0-09)    | 13<br>(11 - 15)             | 31-27  |
| Saint Vincent and the Grenadines | 0-08<br>(0-06 - 0-09) | 0-08<br>(0-07 - 0-09) | 0-08<br>(0-06 - 0-09) | 0-08<br>(0-06 - 0-09) | 0-08<br>(0-06 - 0-09) | 0-08<br>(0-06 - 0-09) | -0-03<br>(-0-38 - 0-32)   | 8<br>(7 - 10)               | ..     |
| Suriname                         | 0-08<br>(0-07 - 0-09) | 0-08<br>(0-06 - 0-09) | 0-07<br>(0-06 - 0-09) | 0-07<br>(0-06 - 0-09) | 0-07<br>(0-06 - 0-09) | 0-07<br>(0-06 - 0-09) | -0-24<br>(-0-58 - 0-06)   | 38<br>(32 - 46)             | 34-64  |
| Trinidad and Tobago              | 0-12<br>(0-1 - 0-14)  | 0-12<br>(0-1 - 0-14)  | 0-11<br>(0-09 - 0-13) | 0-11<br>(0-09 - 0-13) | 0-11<br>(0-09 - 0-13) | 0-11<br>(0-09 - 0-13) | -0-23<br>(-0-55 - 0-11)   | 152<br>(127 - 183)          | 17-95  |
| Virgin Islands U.S.              | 0-09<br>(0-07 - 0-11) | 0-09<br>(0-08 - 0-11) | 0-09<br>(0-08 - 0-11) | 0-09<br>(0-08 - 0-11) | 0-09<br>(0-08 - 0-11) | 0-09<br>(0-08 - 0-11) | 0-17<br>(-0-17 - 0-5)     | 11<br>(9 - 14)              | ..     |
| Central Latin America            | 0-06<br>(0-05 - 0-08) | 0-06<br>(0-06 - 0-07) | 0-06<br>(0-06 - 0-08) | 0-06<br>(0-05 - 0-07) | 0-06<br>(0-05 - 0-06) | 0-06<br>(0-05 - 0-07) | -0-33<br>(-0-54 to -0-12) | 14 448<br>(12 520 - 16 977) | 49-33  |
| Colombia                         | 0-06<br>(0-05 - 0-07) | 0-08<br>(0-07 - 0-09) | 0-07<br>(0-06 - 0-07) | 0-06<br>(0-05 - 0-06) | 0-05<br>(0-04 - 0-05) | 0-04<br>(0-04 - 0-04) | -1-9<br>(-2-56 to -1-23)  | 1772<br>(1669 - 1929)       | -2-97  |
| Costa Rica                       | 0-06<br>(0-05 - 0-07) | 0-06<br>(0-05 - 0-07) | 0-06<br>(0-05 - 0-07) | 0-05<br>(0-04 - 0-06) | 0-05<br>(0-05 - 0-06) | 0-05<br>(0-05 - 0-07) | -0-17<br>(-0-44 - 0-21)   | 261<br>(221 - 318)          | 65-47  |
| El Salvador                      | 0-03<br>(0-02 - 0-03) | 0-03<br>(0-02 - 0-03) | 0-03<br>(0-02 - 0-03) | 0-02<br>(0-02 - 0-03) | 0-02<br>(0-02 - 0-02) | 0-02<br>(0-02 - 0-03) | -0-66<br>(-1-21 to -0-23) | 128<br>(112 - 145)          | 5-2    |
| Guatemala                        | 0-06<br>(0-05 - 0-08) | 0-06<br>(0-05 - 0-08) | 0-06<br>(0-05 - 0-06) | 0-06<br>(0-05 - 0-06) | 0-06<br>(0-05 - 0-07) | 0-06<br>(0-05 - 0-07) | -0-24<br>(-0-55 - 0-09)   | 887<br>(739 - 1081)         | 77-13  |
| Honduras                         | 0-06<br>(0-05 - 0-07) | 0-06<br>(0-05 - 0-07) | 0-06<br>(0-05 - 0-07) | 0-06<br>(0-05 - 0-07) | 0-06<br>(0-05 - 0-07) | 0-06<br>(0-05 - 0-07) | 0-0<br>(-0-41 - 0-39)     | 433<br>(351 - 541)          | 79-31  |
| Mexico                           | 0-06<br>(0-05 - 0-08) | 0-06<br>(0-05 - 0-07) | 0-06<br>(0-05 - 0-08) | 0-05<br>(0-05 - 0-06) | 0-05<br>(0-05 - 0-06) | 0-06<br>(0-05 - 0-08) | -0-07<br>(-0-31 - 0-17)   | 7813<br>(6533 - 9529)       | 55-79  |
| Nicaragua                        | 0-06<br>(0-05 - 0-07) | 0-06<br>(0-05 - 0-06) | 0-06<br>(0-05 - 0-07) | 0-06<br>(0-05 - 0-07) | 0-06<br>(0-05 - 0-07) | 0-06<br>(0-05 - 0-07) | 0-07<br>(-0-36 - 0-4)     | 338<br>(282 - 411)          | 85-22  |
| Panama                           | 0-1<br>(0-09 - 0-12)  | 0-1<br>(0-09 - 0-12)  | 0-1<br>(0-08 - 0-11)  | 0-1<br>(0-08 - 0-11)  | 0-1<br>(0-09 - 0-12)  | 0-1<br>(0-09 - 0-12)  | -0-01<br>(-0-37 - 0-34)   | 398<br>(335 - 465)          | 77-1   |
| Venezuela                        | 0-08<br>(0-07 - 0-1)  | 0-08<br>(0-07 - 0-1)  | 0-08<br>(0-07 - 0-1)  | 0-08<br>(0-07 - 0-09) | 0-09<br>(0-07 - 0-1)  | 0-08<br>(0-07 - 0-1)  | -0-04<br>(-0-47 - 0-41)   | 2417<br>(2033 - 2823)       | 72-12  |
| Tropical Latin America           | 0-11<br>(0-09 - 0-14) | 0-11<br>(0-09 - 0-14) | 0-1<br>(0-09 - 0-12)  | 0-1<br>(0-09 - 0-12)  | 0-09<br>(0-08 - 0-1)  | 0-09<br>(0-08 - 0-1)  | -0-94<br>(-1-42 to -0-44) | 18 392<br>(16 286 - 20 965) | 14-04  |
| Brazil                           | 0-11<br>(0-09 - 0-14) | 0-11<br>(0-09 - 0-14) | 0-1<br>(0-09 - 0-12)  | 0-1<br>(0-09 - 0-12)  | 0-09<br>(0-08 - 0-1)  | 0-09<br>(0-08 - 0-1)  | -0-95<br>(-1-45 to -0-44) | 17 988<br>(15 946 - 20 517) | 13-25  |
| Paraguay                         | 0-07<br>(0-06 - 0-08) | 0-06<br>(0-05 - 0-07) | 0-06<br>(0-05 - 0-07) | 0-06<br>(0-06 - 0-07) | 0-07<br>(0-05 - 0-08) | 0-07<br>(0-06 - 0-08) | -0-01<br>(-0-42 - 0-37)   | 405<br>(343 - 485)          | 64-8   |
| North Africa and Middle East     | 0-09<br>(0-08 - 0-11) | 0-09<br>(0-08 - 0-11) | 0-09<br>(0-08 - 0-11) | 0-1<br>(0-09 - 0-11)  | 0-1<br>(0-09 - 0-12)  | 0-11<br>(0-1 - 0-12)  | 0-57<br>(0-44 - 0-72)     | 56 899<br>(50 246 - 65 831) | 105-51 |
| Afghanistan                      | 0-08<br>(0-07 - 0-1)  | 0-09<br>(0-07 - 0-1)  | 0-09<br>(0-08 - 0-11) | 0-09<br>(0-08 - 0-11) | 0-07<br>(0-07 - 0-08) | 0-09<br>(0-08 - 0-11) | 0-48<br>(0-07 - 0-88)     | 2722<br>(2236 - 3313)       | 216    |
| Algeria                          | 0-1<br>(0-08 - 0-12)  | 0-1<br>(0-08 - 0-12)  | 0-1<br>(0-08 - 0-12)  | 0-09<br>(0-08 - 0-11) | 0-09<br>(0-08 - 0-11) | 0-1<br>(0-08 - 0-12)  | -0-12<br>(-0-6 - 0-32)    | 3645<br>(2944 - 4532)       | 61-17  |



|                                      |                       |                       |                       |                       |                       |                       |                           |                                |        |
|--------------------------------------|-----------------------|-----------------------|-----------------------|-----------------------|-----------------------|-----------------------|---------------------------|--------------------------------|--------|
| Bahrain                              | 0-05<br>(0-04 - 0-06) | 0-05<br>(0-04 - 0-06) | 0-05<br>(0-04 - 0-06) | 0-05<br>(0-04 - 0-06) | 0-04<br>(0-04 - 0-05) | 0-05<br>(0-04 - 0-06) | -0-25<br>(-0-59 - 0-11)   | 58<br>(47 - 73)                | 166-99 |
| Egypt                                | 0-17<br>(0-14 - 0-2)  | 0-17<br>(0-14 - 0-2)  | 0-16<br>(0-14 - 0-18) | 0-16<br>(0-14 - 0-19) | 0-16<br>(0-13 - 0-19) | 0-16<br>(0-14 - 0-19) | -0-13<br>(-0-51 - 0-24)   | 13 745<br>(11 539 - 16 393)    | 61-54  |
| Iran                                 | 0-07<br>(0-06 - 0-08) | 0-07<br>(0-06 - 0-08) | 0-06<br>(0-06 - 0-08) | 0-07<br>(0-06 - 0-08) | 0-07<br>(0-06 - 0-08) | 0-07<br>(0-06 - 0-08) | -0-11<br>(-0-49 - 0-34)   | 4987<br>(4177 - 6191)          | 48-07  |
| Iraq                                 | 0-09<br>(0-07 - 0-11) | 0-09<br>(0-07 - 0-11) | 0-09<br>(0-07 - 0-11) | 0-09<br>(0-07 - 0-11) | 0-09<br>(0-07 - 0-11) | 0-09<br>(0-07 - 0-11) | -0-14<br>(-0-6 - 0-3)     | 3143<br>(2529 - 3966)          | 115-9  |
| Jordan                               | 0-22<br>(0-18 - 0-26) | 0-22<br>(0-19 - 0-26) | 0-2<br>(0-17 - 0-24)  | 0-21<br>(0-19 - 0-24) | 0-21<br>(0-19 - 0-24) | 0-22<br>(0-19 - 0-26) | 0-07<br>(-0-22 - 0-4)     | 1541<br>(1280 - 1864)          | 142-31 |
| Kuwait                               | 0-1<br>(0-08 - 0-12)  | 0-1<br>(0-08 - 0-12)  | 0-1<br>(0-08 - 0-12)  | 0-1<br>(0-08 - 0-12)  | 0-1<br>(0-08 - 0-12)  | 0-1<br>(0-08 - 0-12)  | -0-14<br>(-0-54 - 0-31)   | 337<br>(265 - 429)             | 89-01  |
| Lebanon                              | 0-08<br>(0-06 - 0-09) | 0-08<br>(0-06 - 0-09) | 0-07<br>(0-06 - 0-09) | 0-08<br>(0-07 - 0-1)  | 0-08<br>(0-07 - 0-09) | 0-08<br>(0-07 - 0-09) | 0-21<br>(-0-2 - 0-53)     | 453<br>(385 - 543)             | 131-35 |
| Libya                                | 0-11<br>(0-09 - 0-13) | 0-11<br>(0-09 - 0-13) | 0-11<br>(0-09 - 0-13) | 0-11<br>(0-09 - 0-13) | 0-11<br>(0-09 - 0-13) | 0-1<br>(0-09 - 0-13)  | -0-13<br>(-0-54 - 0-32)   | 597<br>(487 - 730)             | 46-46  |
| Morocco                              | 0-04<br>(0-03 - 0-04) | 0-04<br>(0-04 - 0-05) | 0-04<br>(0-04 - 0-05) | 0-04<br>(0-04 - 0-05) | 0-04<br>(0-04 - 0-05) | 0-04<br>(0-04 - 0-05) | 0-46<br>(0-06 - 0-83)     | 1366<br>(1138 - 1655)          | 71-58  |
| Oman                                 | 0-05<br>(0-04 - 0-06) | 0-05<br>(0-04 - 0-06) | 0-05<br>(0-04 - 0-06) | 0-05<br>(0-04 - 0-06) | 0-05<br>(0-04 - 0-06) | 0-05<br>(0-04 - 0-06) | -0-22<br>(-0-66 - 0-21)   | 192<br>(158 - 239)             | 143-33 |
| Palestine                            | 0-09<br>(0-07 - 0-11) | 0-09<br>(0-07 - 0-11) | 0-09<br>(0-07 - 0-11) | 0-09<br>(0-07 - 0-11) | 0-09<br>(0-07 - 0-11) | 0-09<br>(0-07 - 0-11) | 0-01<br>(-0-41 - 0-43)    | 409<br>(326 - 516)             | 153-59 |
| Qatar                                | 0-09<br>(0-08 - 0-12) | 0-09<br>(0-07 - 0-11) | 0-09<br>(0-08 - 0-12) | 0-1<br>(0-08 - 0-12)  | 0-1<br>(0-08 - 0-12)  | 0-1<br>(0-08 - 0-12)  | 0-21<br>(-0-34 - 0-66)    | 195<br>(150 - 256)             | 400-09 |
| Saudi Arabia                         | 0-08<br>(0-07 - 0-1)  | 0-08<br>(0-07 - 0-1)  | 0-08<br>(0-07 - 0-1)  | 0-08<br>(0-07 - 0-09) | 0-08<br>(0-07 - 0-09) | 0-08<br>(0-07 - 0-1)  | -0-07<br>(-0-22 - 0-08)   | 2419<br>(2021 - 2907)          | 93-55  |
| Sudan                                | 0-08<br>(0-07 - 0-1)  | 0-08<br>(0-07 - 0-1)  | 0-08<br>(0-07 - 0-1)  | 0-08<br>(0-06 - 0-1)  | 0-08<br>(0-06 - 0-1)  | 0-08<br>(0-07 - 0-1)  | -0-21<br>(-0-64 - 0-21)   | 2820<br>(2289 - 3530)          | 97-38  |
| Syria                                | 0-12<br>(0-1 - 0-14)  | 0-12<br>(0-1 - 0-15)  | 0-12<br>(0-1 - 0-14)  | 0-13<br>(0-1 - 0-15)  | 0-13<br>(0-11 - 0-15) | 0-13<br>(0-1 - 0-15)  | 0-15<br>(-0-18 - 0-55)    | 2064<br>(1709 - 2494)          | 58-02  |
| Tunisia                              | 0-08<br>(0-07 - 0-09) | 0-08<br>(0-07 - 0-09) | 0-07<br>(0-06 - 0-08) | 0-07<br>(0-06 - 0-08) | 0-08<br>(0-07 - 0-09) | 0-08<br>(0-07 - 0-09) | -0-02<br>(-0-35 - 0-37)   | 875<br>(730 - 1048)            | ..     |
| Turkey                               | 0-06<br>(0-06 - 0-06) | 0-07<br>(0-07 - 0-07) | 0-08<br>(0-08 - 0-09) | 0-11<br>(0-1 - 0-11)  | 0-14<br>(0-14 - 0-15) | 0-16<br>(0-16 - 0-17) | 3-64<br>(3-52 - 3-76)     | 12 677<br>(12 149 - 13 180)    | 302-87 |
| United Arab Emirates                 | 0-09<br>(0-08 - 0-11) | 0-09<br>(0-08 - 0-11) | 0-08<br>(0-07 - 0-1)  | 0-09<br>(0-08 - 0-1)  | 0-08<br>(0-07 - 0-1)  | 0-08<br>(0-07 - 0-09) | -0-62<br>(-0-96 to -0-21) | 646<br>(527 - 803)             | 348-96 |
| Yemen                                | 0-08<br>(0-07 - 0-1)  | 0-08<br>(0-06 - 0-1)  | 0-08<br>(0-06 - 0-09) | 0-08<br>(0-06 - 0-09) | 0-08<br>(0-06 - 0-09) | 0-08<br>(0-06 - 0-1)  | -0-11<br>(-0-49 - 0-39)   | 1951<br>(1565 - 2464)          | 136-23 |
| South Asia                           | 0-07<br>(0-06 - 0-09) | 0-06<br>(0-05 - 0-07) | 0-07<br>(0-06 - 0-09) | 0-08<br>(0-07 - 0-09) | 0-06<br>(0-05 - 0-07) | 0-06<br>(0-06 - 0-07) | -0-67<br>(-1-14 to -0-23) | 93 190<br>(82 002 - 105 791)   | 37-62  |
| Bangladesh                           | 0-06<br>(0-05 - 0-07) | 0-05<br>(0-05 - 0-07) | 0-05<br>(0-04 - 0-06) | 0-05<br>(0-04 - 0-06) | 0-06<br>(0-05 - 0-07) | 0-06<br>(0-05 - 0-07) | 0-48<br>(0-18 - 0-81)     | 8811<br>(7426 - 10 839)        | 97-87  |
| Bhutan                               | 0-07<br>(0-06 - 0-09) | 0-08<br>(0-06 - 0-09) | 0-08<br>(0-07 - 0-09) | 0-08<br>(0-07 - 0-09) | 0-08<br>(0-07 - 0-09) | 0-08<br>(0-07 - 0-09) | 0-22<br>(-0-08 - 0-51)    | 55<br>(47 - 67)                | 79     |
| India                                | 0-08<br>(0-06 - 0-1)  | 0-06<br>(0-05 - 0-07) | 0-08<br>(0-06 - 0-09) | 0-08<br>(0-08 - 0-09) | 0-06<br>(0-05 - 0-07) | 0-06<br>(0-06 - 0-07) | -0-89<br>(-1-46 to -0-35) | 72 187<br>(63 774 - 81 022)    | 26-83  |
| Nepal                                | 0-05<br>(0-05 - 0-06) | 0-06<br>(0-05 - 0-07) | 0-05<br>(0-05 - 0-06) | 0-06<br>(0-05 - 0-07) | 0-07<br>(0-06 - 0-08) | 0-07<br>(0-06 - 0-08) | 0-95<br>(0-62 - 1-28)     | 1764<br>(1495 - 2120)          | 121-73 |
| Pakistan                             | 0-06<br>(0-05 - 0-08) | 0-07<br>(0-06 - 0-08) | 0-06<br>(0-05 - 0-07) | 0-06<br>(0-06 - 0-07) | 0-06<br>(0-05 - 0-08) | 0-07<br>(0-05 - 0-08) | 0-03<br>(-0-28 - 0-35)    | 10 373<br>(8698 - 12 822)      | 87-91  |
| Southeast Asia East Asia and Oceania | 0-03<br>(0-03 - 0-04) | 0-03<br>(0-03 - 0-03) | 0-04<br>(0-04 - 0-04) | 0-05<br>(0-04 - 0-05) | 0-07<br>(0-06 - 0-08) | 0-11<br>(0-1 - 0-12)  | 222 805<br>(4-32 - 4-61)  | 206 457 - 242 873              | 369    |
| East Asia                            | 0-04<br>(0-03 - 0-04) | 0-03<br>(0-03 - 0-03) | 0-04<br>(0-04 - 0-04) | 0-05<br>(0-05 - 0-06) | 0-09<br>(0-08 - 0-1)  | 0-14<br>(0-13 - 0-15) | 5-32<br>(5-18 - 5-49)     | 204 282<br>(189 808 - 221 916) | 442-96 |
| China                                | 0-03<br>(0-03 - 0-03) | 0-03<br>(0-03 - 0-03) | 0-04<br>(0-04 - 0-04) | 0-05<br>(0-05 - 0-05) | 0-08<br>(0-08 - 0-09) | 0-14<br>(0-13 - 0-16) | 5-67<br>(5-5 - 5-87)      | 198 225<br>(184 244 - 214 994) | 497    |
| North Korea                          | 0-13<br>(0-11 - 0-15) | 0-13<br>(0-11 - 0-15) | 0-13<br>(0-11 - 0-15) | 0-13<br>(0-11 - 0-15) | 0-13<br>(0-11 - 0-15) | 0-13<br>(0-1 - 0-15)  | -0-0<br>(-0-37 - 0-4)     | 3343<br>(2792 - 3961)          | 33-84  |
| Taiwan                               | 0-1<br>(0-09 - 0-12)  | 0-1<br>(0-09 - 0-12)  | 0-11<br>(0-09 - 0-13) | 0-11<br>(0-09 - 0-13) | 0-11<br>(0-09 - 0-13) | 0-11<br>(0-09 - 0-13) | 0-2<br>(-0-16 - 0-62)     | 2715<br>(2218 - 3246)          | 41-19  |
| Oceania                              | 0-08<br>(0-07 - 0-09) | 0-08<br>(0-07 - 0-09) | 0-08<br>(0-06 - 0-09) | 0-08<br>(0-06 - 0-09) | 0-08<br>(0-06 - 0-09) | 0-08<br>(0-06 - 0-09) | -0-09<br>(-0-33 - 0-18)   | 725<br>(611 - 861)             | 73-9   |
| American Samoa                       | 0-08<br>(0-07 - 0-09) | 0-08<br>(0-06 - 0-09) | 0-08<br>(0-06 - 0-09) | 0-07<br>(0-06 - 0-09) | 0-07<br>(0-06 - 0-09) | 0-07<br>(0-06 - 0-09) | -0-22<br>(-0-5 - 0-11)    | 5<br>(4 - 6)                   | ..     |
| Federated States of Micronesia       | 0-08<br>(0-06 - 0-09) | 0-08<br>(0-06 - 0-09) | 0-08<br>(0-06 - 0-09) | 0-08<br>(0-06 - 0-09) | 0-08<br>(0-06 - 0-09) | 0-08<br>(0-06 - 0-09) | -0-04<br>(-0-37 - 0-26)   | 6<br>(5 - 8)                   | 5-4    |
| Fiji                                 | 0-07<br>(0-06 - 0-09) | 0-07<br>(0-06 - 0-09) | 0-07<br>(0-06 - 0-08) | 0-07<br>(0-06 - 0-08) | 0-07<br>(0-06 - 0-08) | 0-07<br>(0-06 - 0-08) | -0-16<br>(-0-44 - 0-13)   | 55<br>(46 - 67)                | 29-35  |
| Guam                                 | 0-08<br>(0-06 - 0-09) | 0-08<br>(0-07 - 0-09) | 0-08<br>(0-06 - 0-09) | 0-08<br>(0-06 - 0-09) | 0-08<br>(0-06 - 0-09) | 0-08<br>(0-06 - 0-09) | -0-08<br>(-0-38 - 0-24)   | 13<br>(11 - 15)                | ..     |
| Kiribati                             | 0-08<br>(0-06 - 0-09) | 0-07<br>(0-06 - 0-09) | 0-07<br>(0-06 - 0-08) | 0-07<br>(0-06 - 0-08) | 0-07<br>(0-06 - 0-08) | 0-07<br>(0-06 - 0-08) | -0-59<br>(-0-93 to -0-25) | 6<br>(5 - 8)                   | 31-47  |
| Marshall Islands                     | 0-07<br>(0-06 - 0-09) | 0-07<br>(0-06 - 0-09) | 0-07<br>(0-06 - 0-08) | 0-07<br>(0-06 - 0-09) | 0-07<br>(0-06 - 0-09) | 0-07<br>(0-06 - 0-09) | -0-0<br>(-0-28 - 0-27)    | 5<br>(4 - 5)                   | 71-91  |
| Northern Mariana Islands             | 0-08<br>(0-07 - 0-09) | 0-08<br>(0-07 - 0-09) | 0-08<br>(0-06 - 0-09) | 0-08<br>(0-06 - 0-09) | 0-08<br>(0-06 - 0-09) | 0-07<br>(0-06 - 0-09) | -0-18<br>(-0-5 - 0-11)    | 8<br>(6 - 9)                   | ..     |
| Papua New Guinea                     | 0-08<br>(0-07 - 0-09) | 0-08<br>(0-07 - 0-09) | 0-08<br>(0-07 - 0-09) | 0-08<br>(0-07 - 0-09) | 0-08<br>(0-07 - 0-09) | 0-08<br>(0-07 - 0-09) | -0-06<br>(-0-38 - 0-32)   | 507<br>(421 - 610)             | 90-58  |
| Samoa                                | 0-08<br>(0-06 - 0-09) | 0-07<br>(0-06 - 0-09) | 0-07<br>(0-06 - 0-08) | 0-07<br>(0-06 - 0-08) | 0-07<br>(0-06 - 0-08) | 0-07<br>(0-06 - 0-08) | -0-34<br>(-0-68 to -0-03) | 12<br>(10 - 15)                | 16-66  |
| Solomon Islands                      | 0-07<br>(0-06 - 0-09) | 0-07<br>(0-06 - 0-09) | 0-07<br>(0-06 - 0-08) | 0-07<br>(0-06 - 0-08) | 0-07<br>(0-06 - 0-08) | 0-07<br>(0-06 - 0-08) | -0-33<br>(-0-64 to -0-06) | 33<br>(28 - 40)                | 82-93  |

|                                  |                       |                       |                       |                       |                       |                       |                           |                             |        |
|----------------------------------|-----------------------|-----------------------|-----------------------|-----------------------|-----------------------|-----------------------|---------------------------|-----------------------------|--------|
| Tonga                            | 0-08<br>(0-06 - 0-09) | 0-08<br>(0-06 - 0-09) | 0-07<br>(0-06 - 0-09) | 0-07<br>(0-06 - 0-09) | 0-07<br>(0-06 - 0-09) | 0-07<br>(0-06 - 0-09) | -0-18<br>(-0-48 - 0-15)   | 7<br>(6 - 8)                | 10     |
| Vanuatu                          | 0-08<br>(0-07 - 0-09) | 0-08<br>(0-07 - 0-09) | 0-08<br>(0-06 - 0-09) | 0-08<br>(0-06 - 0-09) | 0-08<br>(0-06 - 0-09) | 0-08<br>(0-06 - 0-09) | -0-26<br>(-0-58 - 0-05)   | 18<br>(15 - 22)             | 76-34  |
| Southeast Asia                   | 0-03<br>(0-02 - 0-03) | 0-03<br>(0-02 - 0-03) | 0-03<br>(0-03 - 0-03) | 0-04<br>(0-03 - 0-04) | 0-03<br>(0-03 - 0-04) | 0-03<br>(0-02 - 0-04) | 0-39<br>(0-14 - 0-65)     | 17 798<br>(14 633 - 21 670) | 88-01  |
| Cambodia                         | 0-03<br>(0-02 - 0-03) | 0-03<br>(0-02 - 0-03) | 0-03<br>(0-02 - 0-03) | 0-03<br>(0-02 - 0-03) | 0-03<br>(0-02 - 0-03) | 0-02<br>(0-02 - 0-03) | -0-53<br>(-0-85 to -0-24) | 316<br>(259 - 379)          | 75-2   |
| Indonesia                        | 0-02<br>(0-02 - 0-03) | 0-02<br>(0-02 - 0-02) | 0-03<br>(0-02 - 0-03) | 0-02<br>(0-02 - 0-02) | 0-03<br>(0-03 - 0-03) | 0-03<br>(0-03 - 0-04) | 1-13<br>(0-48 - 1-8)      | 7233<br>(5761 - 9210)       | 141-01 |
| Laos                             | 0-03<br>(0-02 - 0-03) | 0-03<br>(0-02 - 0-03) | 0-03<br>(0-02 - 0-03) | 0-03<br>(0-02 - 0-03) | 0-02<br>(0-02 - 0-03) | 0-03<br>(0-02 - 0-03) | -0-32<br>(-0-61 - 0-01)   | 143<br>(118 - 173)          | 64-05  |
| Malaysia                         | 0-03<br>(0-03 - 0-04) | 0-03<br>(0-03 - 0-04) | 0-04<br>(0-03 - 0-04) | 0-05<br>(0-04 - 0-06) | 0-05<br>(0-04 - 0-06) | 0-03<br>(0-03 - 0-04) | -0-03<br>(-0-25 - 0-22)   | 885<br>(726 - 1070)         | 91-85  |
| Maldives                         | 0-03<br>(0-02 - 0-03) | 0-03<br>(0-02 - 0-04) | 0-03<br>(0-03 - 0-04) | 0-03<br>(0-03 - 0-04) | 0-03<br>(0-03 - 0-04) | 0-03<br>(0-03 - 0-04) | 0-33<br>(0-11 - 0-57)     | 10<br>(8 - 12)              | 131-16 |
| Mauritius                        | 0-03<br>(0-03 - 0-04) | 0-03<br>(0-03 - 0-04) | 0-04<br>(0-03 - 0-05) | 0-04<br>(0-03 - 0-05) | 0-03<br>(0-03 - 0-04) | 0-03<br>(0-03 - 0-04) | 0-1<br>(-0-15 - 0-35)     | 42<br>(34 - 50)             | 55-25  |
| Myanmar                          | 0-02<br>(0-02 - 0-03) | 0-02<br>(0-02 - 0-03) | 0-02<br>(0-02 - 0-02) | 0-02<br>(0-02 - 0-02) | 0-02<br>(0-02 - 0-03) | 0-02<br>(0-02 - 0-03) | 0-1<br>(-0-17 - 0-36)     | 1094<br>(894 - 1317)        | 49-31  |
| Philippines                      | 0-03<br>(0-02 - 0-03) | 0-03<br>(0-02 - 0-03) | 0-03<br>(0-02 - 0-03) | 0-03<br>(0-02 - 0-03) | 0-02<br>(0-02 - 0-03) | 0-02<br>(0-02 - 0-03) | -0-31<br>(-0-56 to -0-03) | 2062<br>(1712 - 2496)       | 71-07  |
| Sri Lanka                        | 0-03<br>(0-03 - 0-04) | 0-03<br>(0-03 - 0-04) | 0-04<br>(0-03 - 0-05) | 0-04<br>(0-03 - 0-05) | 0-03<br>(0-03 - 0-04) | 0-03<br>(0-03 - 0-04) | 0-15<br>(-0-12 - 0-4)     | 652<br>(540 - 789)          | 49-83  |
| Seychelles                       | 0-03<br>(0-03 - 0-04) | 0-03<br>(0-03 - 0-04) | 0-03<br>(0-03 - 0-04) | 0-03<br>(0-03 - 0-04) | 0-03<br>(0-03 - 0-04) | 0-03<br>(0-03 - 0-04) | -0-15<br>(-0-39 - 0-07)   | 3<br>(3 - 4)                | 50-61  |
| Thailand                         | 0-03<br>(0-03 - 0-04) | 0-03<br>(0-03 - 0-04) | 0-04<br>(0-03 - 0-04) | 0-04<br>(0-04 - 0-05) | 0-03<br>(0-03 - 0-04) | 0-03<br>(0-03 - 0-04) | 0-21<br>(-0-04 - 0-47)    | 2354<br>(1927 - 2863)       | 66-53  |
| Timor-Leste                      | 0-03<br>(0-03 - 0-04) | 0-03<br>(0-03 - 0-04) | 0-03<br>(0-03 - 0-04) | 0-03<br>(0-02 - 0-03) | 0-03<br>(0-02 - 0-03) | 0-03<br>(0-03 - 0-04) | 0-02<br>(-0-24 - 0-24)    | 29<br>(25 - 35)             | 75-66  |
| Vietnam                          | 0-03<br>(0-03 - 0-04) | 0-03<br>(0-03 - 0-04) | 0-04<br>(0-03 - 0-05) | 0-08<br>(0-07 - 0-08) | 0-04<br>(0-04 - 0-05) | 0-03<br>(0-03 - 0-04) | -0-13<br>(-0-38 - 0-13)   | 2947<br>(2424 - 3540)       | 56-29  |
| Sub-Saharan Africa               | 0-07<br>(0-06 - 0-09) | 0-07<br>(0-06 - 0-09) | 0-07<br>(0-06 - 0-08) | 0-07<br>(0-06 - 0-08) | 0-07<br>(0-06 - 0-08) | 0-07<br>(0-06 - 0-08) | -0-23<br>(-0-35 to -0-1)  | 59 928<br>(51 183 - 71 314) | 92-87  |
| Central sub-Saharan Africa       | 0-08<br>(0-07 - 0-1)  | 0-08<br>(0-07 - 0-09) | 0-08<br>(0-07 - 0-09) | 0-08<br>(0-07 - 0-09) | 0-08<br>(0-07 - 0-09) | 0-08<br>(0-07 - 0-09) | -0-15<br>(-0-44 - 0-11)   | 8739<br>(7353 - 10 424)     | 116-45 |
| Angola                           | 0-08<br>(0-07 - 0-1)  | 0-08<br>(0-07 - 0-09) | 0-08<br>(0-07 - 0-09) | 0-08<br>(0-07 - 0-09) | 0-08<br>(0-07 - 0-09) | 0-08<br>(0-07 - 0-09) | -0-11<br>(-0-49 - 0-25)   | 1908<br>(1579 - 2307)       | 125-85 |
| Central African Republic         | 0-08<br>(0-07 - 0-1)  | 0-08<br>(0-07 - 0-09) | 0-08<br>(0-07 - 0-09) | 0-08<br>(0-07 - 0-1)  | 0-08<br>(0-07 - 0-09) | 0-08<br>(0-07 - 0-09) | -0-05<br>(-0-43 - 0-34)   | 373<br>(308 - 453)          | 70-91  |
| Congo (Brazzaville)              | 0-09<br>(0-08 - 0-11) | 0-09<br>(0-08 - 0-11) | 0-09<br>(0-07 - 0-1)  | 0-09<br>(0-07 - 0-1)  | 0-09<br>(0-07 - 0-1)  | 0-09<br>(0-07 - 0-1)  | -0-29<br>(-0-65 - 0-1)    | 377<br>(312 - 450)          | 82-67  |
| Democratic Republic of the Congo | 0-08<br>(0-07 - 0-1)  | 0-08<br>(0-07 - 0-09) | 0-08<br>(0-07 - 0-09) | 0-08<br>(0-07 - 0-09) | 0-08<br>(0-07 - 0-09) | 0-08<br>(0-07 - 0-09) | -0-17<br>(-0-55 - 0-2)    | 5856<br>(4895 - 7067)       | 120-43 |
| Equatorial Guinea                | 0-09<br>(0-07 - 0-1)  | 0-08<br>(0-07 - 0-1)  | 0-08<br>(0-07 - 0-1)  | 0-08<br>(0-07 - 0-1)  | 0-09<br>(0-07 - 0-1)  | 0-09<br>(0-07 - 0-1)  | 0-07<br>(-0-29 - 0-45)    | 68<br>(57 - 82)             | 120-19 |
| Gabon                            | 0-09<br>(0-08 - 0-11) | 0-09<br>(0-08 - 0-11) | 0-09<br>(0-08 - 0-11) | 0-09<br>(0-08 - 0-11) | 0-09<br>(0-08 - 0-11) | 0-09<br>(0-08 - 0-11) | 0-18<br>(-0-18 - 0-58)    | 157<br>(130 - 189)          | 94-71  |
| Eastern sub-Saharan Africa       | 0-05<br>(0-05 - 0-06) | 0-05<br>(0-05 - 0-06) | 0-05<br>(0-05 - 0-06) | 0-05<br>(0-04 - 0-06) | 0-05<br>(0-05 - 0-06) | 0-05<br>(0-05 - 0-06) | 0-04<br>(-0-1 - 0-2)      | 19 206<br>(16 523 - 22 700) | 113-14 |
| Burundi                          | 0-05<br>(0-05 - 0-07) | 0-05<br>(0-05 - 0-07) | 0-06<br>(0-05 - 0-07) | 0-06<br>(0-05 - 0-07) | 0-06<br>(0-05 - 0-07) | 0-06<br>(0-05 - 0-07) | 0-28<br>(-0-13 - 0-65)    | 641<br>(531 - 776)          | 123-94 |
| Comoros                          | 0-12<br>(0-1 - 0-15)  | 0-12<br>(0-1 - 0-15)  | 0-11<br>(0-1 - 0-13)  | 0-11<br>(0-1 - 0-13)  | 0-12<br>(0-1 - 0-14)  | 0-12<br>(0-1 - 0-14)  | -0-17<br>(-0-55 - 0-18)   | 85<br>(70 - 103)            | 84     |
| Djibouti                         | 0-07<br>(0-05 - 0-08) | 0-06<br>(0-05 - 0-08) | 0-06<br>(0-05 - 0-07) | 0-06<br>(0-05 - 0-07) | 0-06<br>(0-05 - 0-07) | 0-06<br>(0-05 - 0-07) | -0-37<br>(-0-7 to -0-0)   | 56<br>(47 - 67)             | 52-23  |
| Eritrea                          | 0-06<br>(0-05 - 0-07) | 0-06<br>(0-05 - 0-07) | 0-06<br>(0-05 - 0-07) | 0-06<br>(0-05 - 0-07) | 0-06<br>(0-05 - 0-07) | 0-06<br>(0-05 - 0-07) | -0-12<br>(-0-49 - 0-22)   | 279<br>(229 - 341)          | 65-55  |
| Ethiopia                         | 0-02<br>(0-02 - 0-03) | 0-03<br>(0-02 - 0-03) | 0-02<br>(0-02 - 0-03) | 0-03<br>(0-02 - 0-03) | 0-03<br>(0-03 - 0-04) | 0-03<br>(0-03 - 0-04) | 0-91<br>(0-55 - 1-31)     | 2895<br>(2351 - 3536)       | 173-67 |
| Kenya                            | 0-05<br>(0-04 - 0-06) | 0-05<br>(0-04 - 0-06) | 0-06<br>(0-05 - 0-07) | 0-04<br>(0-03 - 0-04) | 0-04<br>(0-03 - 0-04) | 0-05<br>(0-04 - 0-05) | -0-28<br>(-0-38 to -0-17) | 1988<br>(1680 - 2393)       | 86-79  |
| Madagascar                       | 0-05<br>(0-05 - 0-07) | 0-05<br>(0-05 - 0-07) | 0-05<br>(0-04 - 0-06) | 0-05<br>(0-04 - 0-06) | 0-05<br>(0-04 - 0-06) | 0-05<br>(0-04 - 0-06) | -0-31<br>(-0-67 - 0-02)   | 1176<br>(972 - 1430)        | 96-63  |
| Malawi                           | 0-07<br>(0-06 - 0-09) | 0-07<br>(0-06 - 0-09) | 0-08<br>(0-06 - 0-09) | 0-07<br>(0-06 - 0-08) | 0-05<br>(0-05 - 0-06) | 0-06<br>(0-05 - 0-07) | -0-83<br>(-1-45 to -0-32) | 941<br>(803 - 1126)         | 50-87  |
| Mozambique                       | 0-06<br>(0-05 - 0-07) | 0-05<br>(0-05 - 0-07) | 0-05<br>(0-05 - 0-07) | 0-05<br>(0-05 - 0-06) | 0-05<br>(0-05 - 0-06) | 0-05<br>(0-05 - 0-07) | -0-13<br>(-0-5 - 0-32)    | 1433<br>(1177 - 1744)       | 111-38 |
| Rwanda                           | 0-03<br>(0-02 - 0-03) | 0-03<br>(0-02 - 0-03) | 0-03<br>(0-02 - 0-03) | 0-03<br>(0-02 - 0-03) | 0-03<br>(0-02 - 0-03) | 0-03<br>(0-02 - 0-03) | 0-15<br>(-0-32 - 0-53)    | 308<br>(249 - 375)          | 72-58  |
| Somalia                          | 0-05<br>(0-05 - 0-07) | 0-05<br>(0-05 - 0-06) | 0-05<br>(0-04 - 0-06) | 0-05<br>(0-05 - 0-06) | 0-05<br>(0-05 - 0-07) | 0-05<br>(0-05 - 0-07) | -0-09<br>(-0-47 - 0-26)   | 504<br>(415 - 617)          | 61-99  |
| South Sudan                      | 0-06<br>(0-05 - 0-07) | 0-06<br>(0-05 - 0-07) | 0-06<br>(0-05 - 0-07) | 0-06<br>(0-05 - 0-07) | 0-06<br>(0-05 - 0-07) | 0-06<br>(0-05 - 0-07) | -0-11<br>(-0-46 - 0-2)    | 771<br>(638 - 951)          | 119-43 |
| Tanzania                         | 0-09<br>(0-08 - 0-11) | 0-09<br>(0-08 - 0-1)  | 0-1<br>(0-09 - 0-12)  | 0-1<br>(0-09 - 0-12)  | 0-11<br>(0-1 - 0-12)  | 0-1<br>(0-08 - 0-12)  | 0-41<br>(-0-03 - 0-84)    | 5099<br>(4224 - 6159)       | 148-39 |
| Uganda                           | 0-06<br>(0-05 - 0-07) | 0-06<br>(0-05 - 0-07) | 0-06<br>(0-05 - 0-07) | 0-05<br>(0-04 - 0-05) | 0-05<br>(0-04 - 0-05) | 0-05<br>(0-05 - 0-05) | -0-74<br>(-1-27 to -0-21) | 1942<br>(1731 - 2200)       | 94-69  |
| Zambia                           | 0-07<br>(0-06 - 0-09) | 0-07<br>(0-06 - 0-09) | 0-06<br>(0-06 - 0-07) | 0-06<br>(0-05 - 0-06) | 0-06<br>(0-06 - 0-06) | 0-07<br>(0-06 - 0-08) | -0-2<br>(-0-53 - 0-14)    | 1075<br>(897 - 1305)        | 93-65  |
| Southern sub-Saharan Africa      | 0-12<br>(0-09 - 0-16) | 0-12<br>(0-09 - 0-16) | 0-13<br>(0-1 - 0-16)  | 0-13<br>(0-1 - 0-16)  | 0-12<br>(0-1 - 0-15)  | 0-13<br>(0-1 - 0-16)  | 0-21<br>(-0-1 - 0-54)     | 8950<br>(6930 - 11 606)     | 66-2   |

|                               |                       |                       |                       |                       |                       |                       |                           |                              |        |
|-------------------------------|-----------------------|-----------------------|-----------------------|-----------------------|-----------------------|-----------------------|---------------------------|------------------------------|--------|
| Botswana                      | 0-08<br>(0-07 - 0-09) | 0-08<br>(0-07 - 0-09) | 0-08<br>(0-07 - 0-1)  | 0-08<br>(0-07 - 0-1)  | 0-08<br>(0-07 - 0-1)  | 0-08<br>(0-07 - 0-1)  | 0-07<br>(-0-27 - 0-44)    | 164<br>(137 - 198)           | 87-33  |
| Lesotho                       | 0-08<br>(0-06 - 0-09) | 0-08<br>(0-06 - 0-09) | 0-08<br>(0-06 - 0-09) | 0-08<br>(0-06 - 0-09) | 0-08<br>(0-06 - 0-09) | 0-08<br>(0-06 - 0-09) | -0-02<br>(-0-37 - 0-31)   | 139<br>(114 - 169)           | 36-81  |
| Namibia                       | 0-1<br>(0-09 - 0-12)  | 0-1<br>(0-09 - 0-12)  | 0-09<br>(0-08 - 0-1)  | 0-09<br>(0-08 - 0-1)  | 0-1<br>(0-09 - 0-12)  | 0-1<br>(0-09 - 0-12)  | -0-03<br>(-0-37 - 0-35)   | 222<br>(186 - 267)           | 81-63  |
| South Africa                  | 0-14<br>(0-1 - 0-19)  | 0-14<br>(0-1 - 0-19)  | 0-15<br>(0-12 - 0-2)  | 0-15<br>(0-12 - 0-19) | 0-14<br>(0-11 - 0-17) | 0-15<br>(0-11 - 0-2)  | 0-29<br>(-0-09 - 0-7)     | 7445<br>(5626 - 9863)        | 66-06  |
| Swaziland<br>(eSwatini)       | 0-04<br>(0-03 - 0-05) | 0-04<br>(0-03 - 0-05) | 0-04<br>(0-03 - 0-04) | 0-04<br>(0-03 - 0-04) | 0-04<br>(0-03 - 0-05) | 0-04<br>(0-03 - 0-05) | -0-05<br>(-0-38 - 0-25)   | 47<br>(39 - 57)              | 65-23  |
| Zimbabwe                      | 0-07<br>(0-06 - 0-08) | 0-07<br>(0-06 - 0-08) | 0-06<br>(0-05 - 0-07) | 0-06<br>(0-06 - 0-07) | 0-07<br>(0-06 - 0-08) | 0-07<br>(0-06 - 0-08) | 0-2<br>(-0-16 - 0-52)     | 933<br>(775 - 1135)          | 66-01  |
| Western sub-Saharan<br>Africa | 0-08<br>(0-07 - 0-09) | 0-08<br>(0-06 - 0-09) | 0-07<br>(0-06 - 0-08) | 0-07<br>(0-06 - 0-08) | 0-07<br>(0-06 - 0-08) | 0-07<br>(0-06 - 0-08) | -0-4<br>(-0-61 to -0-19)  | 23 033<br>(19 701 to 27 438) | 82-25  |
| Benin                         | 0-06<br>(0-05 - 0-07) | 0-06<br>(0-05 - 0-07) | 0-06<br>(0-05 - 0-07) | 0-06<br>(0-05 - 0-07) | 0-06<br>(0-05 - 0-07) | 0-06<br>(0-05 - 0-07) | -0-09<br>(-0-39 - 0-23)   | 570<br>(476 - 695)           | 125-24 |
| Burkina Faso                  | 0-07<br>(0-06 - 0-08) | 0-07<br>(0-06 - 0-08) | 0-06<br>(0-06 - 0-07) | 0-06<br>(0-05 - 0-07) | 0-07<br>(0-06 - 0-08) | 0-07<br>(0-06 - 0-08) | -0-03<br>(-0-36 - 0-33)   | 1014<br>(833 - 1227)         | 107-25 |
| Cameroon                      | 0-08<br>(0-07 - 0-09) | 0-08<br>(0-07 - 0-09) | 0-08<br>(0-06 - 0-09) | 0-07<br>(0-06 - 0-09) | 0-07<br>(0-06 - 0-09) | 0-07<br>(0-06 - 0-09) | -0-3<br>(-0-65 to -0-01)  | 1454<br>(1214 - 1745)        | 86-21  |
| Cape Verde                    | 0-08<br>(0-06 - 0-09) | 0-07<br>(0-06 - 0-09) | 0-08<br>(0-06 - 0-09) | 0-08<br>(0-06 - 0-09) | 0-08<br>(0-07 - 0-09) | 0-08<br>(0-07 - 0-09) | 0-09<br>(-0-22 - 0-44)    | 38<br>(32 - 46)              | 76-61  |
| Chad                          | 0-06<br>(0-05 - 0-07) | 0-06<br>(0-05 - 0-07) | 0-05<br>(0-04 - 0-06) | 0-05<br>(0-04 - 0-06) | 0-06<br>(0-05 - 0-07) | 0-06<br>(0-05 - 0-07) | -0-14<br>(-0-41 - 0-21)   | 665<br>(548 - 820)           | 130-63 |
| Cote d'Ivoire                 | 0-08<br>(0-07 - 0-09) | 0-08<br>(0-06 - 0-09) | 0-07<br>(0-06 - 0-08) | 0-07<br>(0-06 - 0-08) | 0-07<br>(0-06 - 0-09) | 0-07<br>(0-06 - 0-09) | -0-15<br>(-0-54 - 0-19)   | 1435<br>(1204 - 1709)        | 84-62  |
| The Gambia                    | 0-07<br>(0-06 - 0-08) | 0-07<br>(0-06 - 0-08) | 0-07<br>(0-06 - 0-08) | 0-07<br>(0-06 - 0-08) | 0-07<br>(0-06 - 0-08) | 0-07<br>(0-06 - 0-08) | -0-04<br>(-0-35 - 0-26)   | 114<br>(95 - 140)            | 115-6  |
| Ghana                         | 0-05<br>(0-04 - 0-06) | 0-05<br>(0-04 - 0-05) | 0-05<br>(0-05 - 0-06) | 0-05<br>(0-05 - 0-06) | 0-05<br>(0-04 - 0-05) | 0-04<br>(0-04 - 0-05) | -0-49<br>(-0-79 to -0-15) | 1031<br>(892 - 1219)         | 73-3   |
| Guinea                        | 0-07<br>(0-05 - 0-08) | 0-06<br>(0-05 - 0-08) | 0-06<br>(0-05 - 0-08) | 0-06<br>(0-05 - 0-07) | 0-06<br>(0-05 - 0-07) | 0-06<br>(0-05 - 0-07) | -0-2<br>(-0-52 - 0-1)     | 666<br>(555 - 797)           | 105-56 |
| Guinea-Bissau                 | 0-07<br>(0-06 - 0-09) | 0-07<br>(0-06 - 0-09) | 0-07<br>(0-06 - 0-08) | 0-07<br>(0-06 - 0-08) | 0-07<br>(0-06 - 0-08) | 0-07<br>(0-06 - 0-08) | -0-4<br>(-0-69 to -0-12)  | 107<br>(89 - 131)            | 64-28  |
| Liberia                       | 0-07<br>(0-06 - 0-08) | 0-07<br>(0-06 - 0-08) | 0-07<br>(0-06 - 0-08) | 0-07<br>(0-06 - 0-08) | 0-07<br>(0-06 - 0-08) | 0-07<br>(0-06 - 0-08) | -0-07<br>(-0-43 - 0-31)   | 258<br>(215 - 315)           | 113-47 |
| Mali                          | 0-05<br>(0-04 - 0-06) | 0-05<br>(0-04 - 0-06) | 0-04<br>(0-04 - 0-05) | 0-04<br>(0-04 - 0-05) | 0-05<br>(0-04 - 0-06) | 0-05<br>(0-05 - 0-06) | -0-04<br>(-0-62 - 0-5)    | 685<br>(624 - 758)           | 89-43  |
| Mauritania                    | 0-08<br>(0-07 - 0-1)  | 0-08<br>(0-07 - 0-1)  | 0-07<br>(0-06 - 0-08) | 0-07<br>(0-06 - 0-08) | 0-08<br>(0-07 - 0-09) | 0-08<br>(0-07 - 0-09) | -0-16<br>(-0-53 - 0-25)   | 270<br>(224 - 327)           | 102-23 |
| Niger                         | 0-07<br>(0-06 - 0-08) | 0-06<br>(0-05 - 0-07) | 0-06<br>(0-05 - 0-07) | 0-07<br>(0-06 - 0-08) | 0-06<br>(0-05 - 0-07) | 0-07<br>(0-06 - 0-08) | -0-08<br>(-0-44 - 0-28)   | 1126<br>(942 - 1383)         | 149-04 |
| Nigeria                       | 0-09<br>(0-08 - 0-11) | 0-09<br>(0-08 - 0-11) | 0-08<br>(0-06 - 0-09) | 0-08<br>(0-07 - 0-09) | 0-08<br>(0-07 - 0-09) | 0-08<br>(0-07 - 0-1)  | -0-51<br>(-0-87 to -0-15) | 12 160<br>(10 149 - 14 678)  | 70-72  |
| Sao Tome and<br>Principe      | 0-09<br>(0-07 - 0-1)  | 0-08<br>(0-07 - 0-1)  | 0-08<br>(0-07 - 0-1)  | 0-08<br>(0-07 - 0-1)  | 0-08<br>(0-07 - 0-1)  | 0-08<br>(0-07 - 0-1)  | -0-17<br>(-0-51 - 0-15)   | 14<br>(11 - 16)              | 66-19  |
| Senegal                       | 0-06<br>(0-05 - 0-07) | 0-05<br>(0-05 - 0-06) | 0-05<br>(0-04 - 0-05) | 0-05<br>(0-04 - 0-05) | 0-05<br>(0-04 - 0-06) | 0-05<br>(0-04 - 0-06) | -0-35<br>(-0-65 - 0-03)   | 664<br>(554 - 808)           | 93-34  |
| Sierra Leone                  | 0-07<br>(0-06 - 0-08) | 0-07<br>(0-06 - 0-08) | 0-06<br>(0-05 - 0-08) | 0-06<br>(0-05 - 0-08) | 0-06<br>(0-05 - 0-08) | 0-06<br>(0-05 - 0-07) | -0-39<br>(-0-71 to -0-08) | 345<br>(288 - 418)           | 53-23  |
| Togo                          | 0-07<br>(0-06 - 0-09) | 0-07<br>(0-06 - 0-09) | 0-07<br>(0-06 - 0-08) | 0-07<br>(0-06 - 0-08) | 0-07<br>(0-06 - 0-08) | 0-07<br>(0-06 - 0-08) | -0-25<br>(-0-59 - 0-09)   | 418<br>(348 - 504)           | 86-91  |

## Section 6. Unit cost estimates

### 6.1. Definition of unit cost

We estimated unit costs as spending per capita on each service divided by utilisation per capita as shown in equation (7):

$$Unit\ cost_y = \frac{THE\ per\ capita \cdot \widehat{share}_y}{\widehat{utilisation\ rate}_y} \quad (7)$$

where  $y$  denotes either outpatient visit or inpatient admission. Spending per capita was the product of total health expenditures (THE) per capita in 2016 international dollars, and the share of each service in THE. The shares were estimated with NHA data, which was a mutually exclusive and collectively exhaustive account THE through a health system.

### 6.2. Data sources

The NHA tracked spending in the health sector using the System of Health Accounts framework.<sup>15</sup> Bui et al did a systematic review to identify and publish data from 872 reports from 1996 to 2010.<sup>16</sup> The GBD Health Financing Collaborator Network updated the review in 2016 and located 178 additional NHAs for a total of 1050.<sup>17–19</sup> We searched ministry of health websites and collected a total of 1285 country-years of NHA data, including some accounts that reported data for several years.

The NHA functional categories have five “one-digit” level categories for personal health-care services and goods, two for collective health-care services, and seven for health-related functions. Each of the one-digit level categories can be reported in more detail at the “two-digit” level, where the two-digit levels for the curative and rehabilitative care categories distinguish outpatient (HC 1.3 and HC 2.3, respectively) and inpatient services (HC 1.1 and HC 2.1, respectively). We included only NHAs that reported curative and rehabilitative services at the two-digit level, which limited the sample to 795 country-years of NHA data.

Half (391 of 795) of the NHAs that met the inclusion criteria were from the High-Income super-region, and 155 (20%) were from Central Europe, Eastern Europe, and Central Asia (Table S12). The most recent NHA was in 2015. Among countries in the High Income super-region, 79% had at least one NHA between 1990 and 2016 that met the inclusion criteria. Among countries in the sub-Saharan Africa super-region, 61% had at least one NHA. In three super-regions, fewer than half of the countries had at least one NHA: Southeast Asia, East Asia, and Oceania (44%), Latin America and Caribbean (34%), and North Africa and the Middle East (29%).

Our definition of outpatient visits per capita included facility-based preventive maternal and child care (HC 6.4), and vaccinations (HC 6.2). Expenditures on these categories were not, however, included in the expenditure shares. Only 146 of 795 NHAs reported these expenditures, which would have limited the sample size as well as the percentage of countries represented. The absence of these expenditures may have underestimated the unit cost of outpatient visits, and was reported in the main text. Among NHAs that reported these expenditures, they accounted for less than 1% of THE in 101 (69%) country-years, which were predominately from high income countries, and more than 3% of THE in 16 (11%) country-years, which were predominately from low and lower-middle income countries.

We did not produce estimates of the shares of day-patient admissions (HC1.2 and HC2.2) and long-term care (HC 3), because data on utilisation and expenditures were not available globally. Only 120 of 795 NHAs reported expenditures on day-patient admissions. Although 720 of the NHAs reported expenditures on long-term care, utilisation data were not systematically reported in the administrative data sources and rarely reported in the survey data sources.

**Table S12. Description of the National Health Account sample by GBD super-region and time period, and number of countries represented by GBD super-region**

Count of countries by GBD super-region reflects the countries where total health expenditure (THE) per capita values was estimated. Four countries' NHAs didn't report information on the share of THE spent on inpatient services, but did report on share of THE spent on outpatient services. Count of NHAs include these four NHAs. GBD = Global Burden of Disease. NHA = National Health Accounts. THE=Total Health Expenditure.

| GBD super-region                                 | Time periods |           |           |           |           | Total number of NHAs across time periods | Number of Countries in GBD super-region | Number (percentage) of countries with at least one NHA |
|--------------------------------------------------|--------------|-----------|-----------|-----------|-----------|------------------------------------------|-----------------------------------------|--------------------------------------------------------|
|                                                  | 1990-1994    | 1995-1999 | 2000-2004 | 2005-2009 | 2010-2016 |                                          |                                         |                                                        |
| Central Europe, Eastern Europe, and Central Asia | 0            | 8         | 37        | 59        | 51        | 155                                      | 29                                      | 20 (69%)                                               |
| High-income                                      | 0            | 78        | 97        | 104       | 112       | 391                                      | 33                                      | 26 (79%)                                               |
| Latin America and Caribbean                      | 0            | 12        | 7         | 6         | 8         | 33                                       | 29                                      | 10 (34%)                                               |
| North Africa and Middle East                     | 0            | 1         | 7         | 6         | 8         | 22                                       | 21                                      | 6 (29%)                                                |
| South Asia                                       | 0            | 3         | 5         | 8         | 9         | 25                                       | 5                                       | 4 (80%)                                                |
| Southeast Asia, East Asia, and Oceania           | 5            | 14        | 20        | 27        | 18        | 84                                       | 25                                      | 11 (44%)                                               |
| Sub-Saharan Africa                               | 0            | 1         | 17        | 31        | 36        | 85                                       | 46                                      | 28 (61%)                                               |
| <b>Total</b>                                     | 5            | 117       | 190       | 241       | 242       | 795                                      | 188                                     | 105 (56%)                                              |

### 6.3. Estimates of expenditures shares

We developed three statistical models to mutually exclusively and collectively exhaustively estimate the share of THE spent on: outpatient services, inpatient services, and all other functions in 184 countries covering 22 years. We estimated the three logit transformed shares of THE using a linear regression model with lag distributed income as the independent variable, where income refers to gross domestic product per capita. Dependent variables were logit transformed to bound predictions between zero and one. The estimated coefficient (standard error) for lag distributed income was 0.184 (0.023) for the share of outpatient expenditures, 0.094 (0.024) for inpatient, and -0.176 (0.029) for all other functions. We used the results of the linear regression model and lag-distributed income to predict the shares for each country-year, and rescaled the estimates to ensure they summed to one.

We also estimated the shares using the ST-GPR method described in Section 4.3 above, where the linear regression results were the first of three steps. To choose between the two methods, we compared the out-of-sample root mean squared error, and the in-sample coverage (Table S13). To generate the out-of-sample root mean square error, we performed a ten-fold cross-validation procedure, in which we portioned our data by country so that the trained model would be evaluated on data from countries that weren't used to estimate the model. In-sample coverage represents the percentage of data points falling within the 95% uncertainty interval. We reported estimates based on

the linear regression model, because the out-of-sample root mean squared error of the two models were almost the same, and in-sample coverage of the linear regression model was higher, reflecting larger uncertainty intervals.

**Table S13. Regression model fit statistics.**

Root mean square errors were calculated in level space. In-sample coverage is the percentage of data points falling within the 95% uncertainty interval.

| Share                                              | Outpatient | Inpatient | All other functions |
|----------------------------------------------------|------------|-----------|---------------------|
| <b>Out-of-sample root mean square error</b>        |            |           |                     |
| <b>Linear regression</b>                           | 0.07917    | 0.08874   | 0.1273              |
| <b>Spatio-temporal Gaussian Process Regression</b> | 0.07912    | 0.08850   | 0.1284              |
| <b>In-sample coverage</b>                          |            |           |                     |
| <b>Linear regression</b>                           | 95 %       | 94%       | 94%                 |
| <b>Spatio-temporal Gaussian Process Regression</b> | 45%        | 43%       | 69%                 |

We propagated uncertainty by calculating 1,000 draws for each model at the country-year level. To ensure the estimated shares were collectively exhaustive of THE, at the country-year-draw level, the three shares were rescaled to ensure they summed to one.

#### 6.4. Comparison to WHO-CHOICE estimates

We compared our unit cost estimates to the widely-referenced estimates by researchers on the World Health Organization Choosing Interventions that are Cost Effective (WHO-CHOICE) project. The WHO-CHOICE researchers were the first to produce global estimates of the unit cost of outpatient visits and inpatient bed-days.<sup>20</sup> The estimates were updated to report unit costs for 2007 and 2008 in three currencies: local currency, United States dollars, and international dollars.<sup>21</sup>

We compared our (IHME) 2008 estimates to the WHO-CHOICE estimates of outpatient visits for secondary hospitals and inpatient bed-days for teaching hospitals. WHO-CHOICE estimated costs for three levels of facilities for each service, and we based our comparison on the level with the highest unit costs. To facilitate comparison between the estimates we made two conversions. First, we converted WHO-CHOICE estimates of cost per inpatient per-bed to cost per admission by multiplying each estimate by 9.75, which was the average length of stay secondary and teaching hospitals for every country in the WHO-CHOICE prediction equations. Second, our 2008 unit cost estimates were measured in 2017 international dollars while WHO-CHOICE's 2008 unit cost estimates were measured in 2010 international dollars. We deflated our estimates measured in 2017 dollars to 2010 dollars using GDP deflators provided by the International Monetary Fund.<sup>22</sup>

We ran least squares regressions of our estimates on the WHO-CHOICE estimates and restricted the intercept to equal zero. The slope of this regression for outpatient cost was 2.0267 meaning that our outpatient cost estimates were, on average, 102.67% higher than WHO-CHOICE. Similarly, the slope of the inpatient regression on unit cost was 1.0264 meaning that our estimates were, on average, 2.64% higher than WHO-CHOICE.

#### 6.5. Comparison to other comprehensive, national studies of the unit cost of services

To compare our results to other comprehensive, national cost estimates, we conducted a literature search on Medline with the following strategies: 1) MeSH terms (Direct Service Cost or Hospital Cost) and ("cost per outpatient visit"

OR “cost per inpatient admission”), and 2) MeSH terms (Direct Service Cost or Hospital Cost) and “national costing study” OR “country costing study.” The first strategy resulted in 309 articles, of which 265 were disease-specific, 27 did not report either inpatient or outpatient cost estimates, 16 were not nationally representative, and one reported data before 1990. (Exclusion criteria were applied sequentially.) The second strategy resulted in 55 articles, of which 41 were disease-specific, 12 were not nationally representative, one didn’t address representativeness, and one did not report either inpatient or outpatient cost estimates.

We also searched for national costing studies reported by national governments and other organisations, and identified studies in the United States and Australia that reported comprehensive unit costs at the national level, as reported in the Discussion section of the main text. NHS Improvement reported the reference cost of a hospital admission in the United Kingdom, but excluded services such as intensive care, chemotherapy, and other high cost drugs.<sup>23</sup> The Canadian Institute of Health Information reported the average cost per resource intensity weight for every location except Quebec and Nunavut.<sup>24</sup> The total number of admissions would be similar, but not the same as the total weighted cases, because the average resource intensity weight is not one.

## 6.6. Country-specific parameters for the calculation of 2016 unit costs

### **Table S14. National estimates of share of total health expenditure on outpatient and inpatient services, utilisation rates, and unit cost in 2016 in 2017 international dollars**

Table displays three sets of national estimates organised by GBD region: 1) THE per capita measured in 2017 international dollars,<sup>25,26</sup> and the estimated share of outpatient visits and inpatient admissions in the national health accounts, 2) utilisation per capita for each service, and 3) cost per outpatient visit and inpatient admission calculated as the ratio of expenditure (THE per capita \* share) to utilisation per capita. For each result, the mean of 1,000 draws is reported, and in parenthesis the uncertainty interval defined as the 2.5<sup>th</sup> and 97.5<sup>th</sup> percentile of draws. The exchange rate for 2017 international dollars to United States dollars is reported to facilitate conversions. GBD= Global Burden of Disease. THE=Total Health Expenditure.

**Table S14: National estimates of share of total health expenditure on outpatient and inpatient services, utilisation rates, and unit cost in 2016 in 2017 international dollars**

|                                                  | Exchange rate 2017 PPP to 2017 USD | Total health expenditure per capita measured in 2017 PPP (95% UI) | Outpatient share (95% UI) | Outpatient utilization per capita (95% UI) | Outpatient unit cost measured in 2017 PPP (95% UI) | Inpatient share (95% UI) | Inpatient utilization per capita (95% UI) | Inpatient unit cost measured in 2017 PPP (95% UI) |
|--------------------------------------------------|------------------------------------|-------------------------------------------------------------------|---------------------------|--------------------------------------------|----------------------------------------------------|--------------------------|-------------------------------------------|---------------------------------------------------|
| Global                                           | ..                                 | ..                                                                | ..                        | 5.32<br>(4.79 – 5.9)                       | ..                                                 | ..                       | 0.1<br>(0.09 – 0.1)                       | ..                                                |
| Central Europe, Eastern Europe, and Central Asia | ..                                 | ..                                                                | ..                        | 9.04<br>(8.66 – 9.41)                      | ..                                                 | ..                       | 0.2<br>(0.19 – 0.21)                      | ..                                                |
| Central Asia                                     | ..                                 | ..                                                                | ..                        | 6.68<br>(6.46 – 6.91)                      | ..                                                 | ..                       | 0.14<br>(0.14 – 0.15)                     | ..                                                |
| Armenia                                          | 0.4                                | 865<br>(733 – 1008)                                               | 21.8<br>(20.7 – 22.9)     | 3.9<br>(3.77 – 4.03)                       | 48<br>(40 – 57)                                    | 26.0<br>(24.7 – 27.3)    | 0.13<br>(0.13 – 0.14)                     | 1710<br>(1426 – 2019)                             |
| Azerbaijan                                       | 0.22                               | 1200<br>(1059 – 1341)                                             | 24.0<br>(22.9 – 25.1)     | 4.67<br>(4.5 – 4.85)                       | 62<br>(54 – 70)                                    | 27.2<br>(26.1 – 28.5)    | 0.07<br>(0.06 – 0.07)                     | 4938<br>(4342 – 5613)                             |
| Georgia                                          | 0.36                               | 859<br>(772 – 953)                                                | 22.0<br>(20.9 – 23.1)     | 6.06<br>(5.24 – 7.16)                      | 31<br>(26 – 38)                                    | 26.1<br>(24.9 – 27.4)    | 0.09<br>(0.09 – 0.1)                      | 2408<br>(2128 – 2720)                             |
| Kazakhstan                                       | 0.31                               | 1040<br>(965 – 1115)                                              | 25.0<br>(23.9 – 26.2)     | 6.67<br>(6.45 – 6.91)                      | 39<br>(35 – 43)                                    | 27.8<br>(26.6 – 29.1)    | 0.15<br>(0.15 – 0.16)                     | 1872<br>(1699 – 2046)                             |
| Kyrgyzstan                                       | 0.3                                | 322<br>(298 – 355)                                                | 19.1<br>(17.8 – 20.5)     | 3.48<br>(3.38 – 3.58)                      | 18<br>(16 – 20)                                    | 24.4<br>(22.8 – 26.1)    | 0.15<br>(0.14 – 0.16)                     | 525<br>(472 – 595)                                |
| Mongolia                                         | 0.28                               | 515<br>(467 – 564)                                                | 22.6<br>(21.6 – 23.7)     | 5.34<br>(4.55 – 6.34)                      | 22<br>(18 – 26)                                    | 26.4<br>(25.3 – 27.7)    | 0.15<br>(0.13 – 0.18)                     | 907<br>(717 – 1126)                               |
| Tajikistan                                       | 0.25                               | 212<br>(198 – 230)                                                | 18.5<br>(17.2 – 20.0)     | 4.55<br>(4.38 – 4.72)                      | 9<br>(8 – 10)                                      | 24.0<br>(22.3 – 25.8)    | 0.12<br>(0.12 – 0.13)                     | 410<br>(368 – 459)                                |
| Turkmenistan                                     | 0.39                               | 1165<br>(1043 – 1312)                                             | 23.8<br>(22.7 – 24.9)     | 3.55<br>(3.42 – 3.68)                      | 78<br>(68 – 89)                                    | 27.1<br>(26.0 – 28.3)    | 0.15<br>(0.12 – 0.18)                     | 2182<br>(1706 – 2668)                             |
| Uzbekistan                                       | 0.2                                | 471<br>(437 – 506)                                                | 20.9<br>(19.8 – 22.1)     | 9.62<br>(9.34 – 9.92)                      | 10<br>(9 – 11)                                     | 25.5<br>(24.2 – 26.9)    | 0.17<br>(0.16 – 0.17)                     | 717<br>(648 – 790)                                |
| Central Europe                                   | ..                                 | ..                                                                | ..                        | 7.95<br>(7.66 – 8.23)                      | ..                                                 | ..                       | 0.19<br>(0.18 – 0.21)                     | ..                                                |
| Albania                                          | 0.35                               | 891<br>(823 – 977)                                                | 22.6<br>(21.5 – 23.6)     | 5.56<br>(4.72 – 6.49)                      | 36<br>(30 – 44)                                    | 26.4<br>(25.3 – 27.6)    | 0.09<br>(0.09 – 0.1)                      | 2546<br>(2275 – 2879)                             |
| Bosnia and Herzegovina                           | 0.39                               | 1115<br>(1040 – 1202)                                             | 22.4<br>(21.4 – 23.5)     | 10.15<br>(8.98 – 11.85)                    | 25<br>(21 – 29)                                    | 26.3<br>(25.2 – 27.6)    | 0.12<br>(0.1 – 0.14)                      | 2550<br>(2104 – 3087)                             |
| Bulgaria                                         | 0.37                               | 1707<br>(1641 – 1779)                                             | 24.1<br>(23.0 – 25.2)     | 6.05<br>(5.68 – 6.41)                      | 68<br>(63 – 74)                                    | 27.3<br>(26.1 – 28.5)    | 0.29<br>(0.28 – 0.31)                     | 1592<br>(1460 – 1728)                             |
| Croatia                                          | 0.52                               | 1812<br>(1680 – 1971)                                             | 24.8<br>(23.6 – 25.9)     | 6.5<br>(6.28 – 6.73)                       | 69<br>(63 – 76)                                    | 27.6<br>(26.5 – 28.9)    | 0.18<br>(0.17 – 0.19)                     | 2753<br>(2489 – 3067)                             |
| Czech Republic                                   | 0.54                               | 2656<br>(2537 – 2779)                                             | 25.9<br>(24.6 – 27.2)     | 10.8<br>(10.4 – 11.27)                     | 64<br>(59 – 69)                                    | 28.3<br>(26.9 – 29.6)    | 0.25<br>(0.22 – 0.29)                     | 3035<br>(2546 – 3547)                             |
| Hungary                                          | 0.49                               | 2085<br>(1978 – 2194)                                             | 25.2<br>(24.0 – 26.4)     | 12.71<br>(12.3 – 13.11)                    | 42<br>(38 – 45)                                    | 27.9<br>(26.7 – 29.2)    | 0.21<br>(0.2 – 0.22)                      | 2764<br>(2528 – 3013)                             |
| Macedonia                                        | 0.35                               | 950<br>(834 – 1105)                                               | 23.2<br>(22.2 – 24.3)     | 6.74<br>(6.46 – 7.02)                      | 33<br>(28 – 38)                                    | 26.8<br>(25.7 – 28.0)    | 0.12<br>(0.11 – 0.13)                     | 2081<br>(1800 – 2521)                             |
| Montenegro                                       | 0.41                               | 1015<br>(957 – 1073)                                              | 23.6<br>(22.6 – 24.7)     | 7.27<br>(6.87 – 7.68)                      | 33<br>(30 – 36)                                    | 27.0<br>(25.9 – 28.3)    | 0.12<br>(0.12 – 0.13)                     | 2264<br>(2067 – 2469)                             |
| Poland                                           | 0.46                               | 1805<br>(1731 – 1902)                                             | 25.2<br>(24.0 – 26.4)     | 7.4<br>(7.15 – 7.66)                       | 62<br>(57 – 67)                                    | 27.9<br>(26.7 – 29.2)    | 0.17<br>(0.16 – 0.18)                     | 2940<br>(2679 – 3219)                             |
| Romania                                          | 0.41                               | 1200<br>(1111 – 1297)                                             | 24.3<br>(23.1 – 25.3)     | 4.99<br>(4.8 – 5.17)                       | 58<br>(53 – 65)                                    | 27.4<br>(26.2 – 28.6)    | 0.24<br>(0.22 – 0.26)                     | 1393<br>(1231 – 1568)                             |
| Serbia                                           | 0.37                               | 1469<br>(1352 – 1591)                                             | 23.3<br>(22.2 – 24.3)     | 7.77<br>(7.51 – 8.01)                      | 44<br>(40 – 48)                                    | 26.8<br>(25.7 – 28.0)    | 0.12<br>(0.12 – 0.13)                     | 3155<br>(2844 – 3495)                             |
| Slovakia                                         | 0.54                               | 2309<br>(2152 – 2477)                                             | 25.6<br>(24.4 – 26.9)     | 12.6<br>(12.18 – 13.0)                     | 47<br>(43 – 52)                                    | 28.1<br>(26.8 – 29.5)    | 0.21<br>(0.19 – 0.22)                     | 3164<br>(2865 – 3499)                             |
| Slovenia                                         | 0.67                               | 2876<br>(2770 – 2992)                                             | 25.9<br>(24.6 – 27.1)     | 7.47<br>(7.25 – 7.69)                      | 100<br>(93 – 107)                                  | 28.2<br>(26.9 – 29.6)    | 0.19<br>(0.18 – 0.2)                      | 4347<br>(3986 – 4707)                             |
| Eastern Europe                                   | ..                                 | ..                                                                | ..                        | 10.61<br>(10.09 – 11.14)                   | ..                                                 | ..                       | 0.23<br>(0.22 – 0.24)                     | ..                                                |
| Belarus                                          | 0.27                               | 1239<br>(1179 – 1304)                                             | 24.2<br>(23.1 – 25.3)     | 12.84<br>(12.48 – 13.18)                   | 23<br>(22 – 25)                                    | 27.4<br>(26.2 – 28.6)    | 0.25<br>(0.21 – 0.3)                      | 1348<br>(1122 – 1629)                             |
| Estonia                                          | 0.61                               | 2027<br>(1895 – 2156)                                             | 25.5<br>(24.3 – 26.7)     | 7.83<br>(7.62 – 8.04)                      | 66<br>(61 – 72)                                    | 28.0<br>(26.8 – 29.4)    | 0.19<br>(0.18 – 0.19)                     | 3052<br>(2793 – 3329)                             |
| Latvia                                           | 0.56                               | 1802<br>(1674 – 1934)                                             | 24.9<br>(23.8 – 26.1)     | 7.21<br>(6.92 – 7.5)                       | 62<br>(57 – 69)                                    | 27.7<br>(26.6 – 29.1)    | 0.19<br>(0.19 – 0.2)                      | 2578<br>(2346 – 2813)                             |
| Lithuania                                        | 0.51                               | 2005<br>(1906 – 2107)                                             | 25.4<br>(24.2 – 26.6)     | 9.68<br>(9.41 – 9.97)                      | 53<br>(49 – 56)                                    | 28.0<br>(26.8 – 29.3)    | 0.26<br>(0.24 – 0.27)                     | 2186<br>(1984 – 2401)                             |
| Moldova                                          | 0.37                               | 568<br>(519 – 623)                                                | 20.1<br>(18.9 – 21.4)     | 6.63<br>(6.42 – 6.84)                      | 17<br>(15 – 19)                                    | 25.0<br>(23.5 – 26.5)    | 0.17<br>(0.16 – 0.17)                     | 855<br>(760 – 966)                                |
| Russia                                           | 0.37                               | 1581<br>(1518 – 1654)                                             | 25.1<br>(23.9 – 26.3)     | 12.02<br>(11.48 – 12.55)                   | 33<br>(31 – 36)                                    | 27.8<br>(26.7 – 29.1)    | 0.23<br>(0.22 – 0.24)                     | 1941<br>(1808 – 2089)                             |
| Ukraine                                          | 0.25                               | 619<br>(576 – 663)                                                | 22.1<br>(21.0 – 23.1)     | 6.3<br>(5.49 – 7.49)                       | 22<br>(18 – 26)                                    | 26.1<br>(24.9 – 27.4)    | 0.23<br>(0.22 – 0.25)                     | 694<br>(626 – 768)                                |
| High-income                                      | ..                                 | ..                                                                | ..                        | 8.63<br>(7.91 – 9.43)                      | ..                                                 | ..                       | 0.14<br>(0.13 – 0.15)                     | ..                                                |
| Australasia                                      | ..                                 | ..                                                                | ..                        | 8.41<br>(8.13 – 8.67)                      | ..                                                 | ..                       | 0.17<br>(0.15 – 0.18)                     | ..                                                |



|                             |      |                         |                       |                          |                    |                       |                       |                             |
|-----------------------------|------|-------------------------|-----------------------|--------------------------|--------------------|-----------------------|-----------------------|-----------------------------|
| Australia                   | 1-1  | 4510<br>(4430 – 4603)   | 29.1<br>(28.3 – 29.9) | 8.49<br>(8.24 – 8.74)    | 154<br>(148 – 162) | 27.6<br>(26.8 – 28.4) | 0.17<br>(0.15 – 0.19) | 7334<br>(6669 – 8087)       |
| New Zealand                 | 1-02 | 3717<br>(3469 – 3967)   | 28.3<br>(27.5 – 29.1) | 7.97<br>(7.44 – 8.43)    | 132<br>(120 – 146) | 27.2<br>(26.4 – 28.0) | 0.16<br>(0.15 – 0.16) | 6479<br>(5973 – 7007)       |
| High-income Asia-Pacific    | ..   | ..                      | ..                    | 16.41<br>(14.77 – 17.83) | ..                 | ..                    | 0.13<br>(0.11 – 0.15) | ..                          |
| Brunei                      | 0-4  | 2037<br>(1792 – 2284)   | 30.9<br>(29.9 – 31.9) | 9.31<br>(7.95 – 11.69)   | 68<br>(54 – 83)    | 28.4<br>(27.4 – 29.4) | 0.11<br>(0.09 – 0.13) | 5260<br>(4199 – 6551)       |
| Japan                       | 0-89 | 4350<br>(4175 – 4542)   | 28.5<br>(27.7 – 29.3) | 16.38<br>(14.21 – 18.21) | 76<br>(67 – 88)    | 27.3<br>(26.5 – 28.1) | 0.12<br>(0.1 – 0.14)  | 10 335<br>(8572 – 12 472)   |
| Singapore                   | 0-6  | 3715<br>(3396 – 4049)   | 31.0<br>(30.0 – 32.0) | 14.56<br>(12.43 – 17.73) | 79<br>(65 – 95)    | 28.5<br>(27.5 – 29.5) | 0.12<br>(0.1 – 0.14)  | 9132<br>(7516 – 11 044)     |
| South Korea                 | 0-75 | 2959<br>(2841 – 3078)   | 28.3<br>(27.5 – 29.1) | 16.7<br>(16.13 – 17.23)  | 50<br>(47 – 53)    | 27.2<br>(26.5 – 28.0) | 0.17<br>(0.16 – 0.18) | 4878<br>(4492 – 5261)       |
| High-income North America   | ..   | ..                      | ..                    | 6.42<br>(5.69 – 7.2)     | ..                 | ..                    | 0.12<br>(0.11 – 0.13) | ..                          |
| Canada                      | 0-93 | 5012<br>(4884 – 5133)   | 29.1<br>(28.3 – 29.8) | 9.28<br>(8.82 – 9.71)    | 157<br>(148 – 167) | 27.6<br>(26.8 – 28.4) | 0.14<br>(0.11 – 0.16) | 10 103<br>(8448 – 12 088)   |
| Greenland                   | 1-19 | ..                      | ..                    | 7.28<br>(6.3 – 8.56)     | ..                 | ..                    | 0.12<br>(0.1 – 0.15)  | ..                          |
| United States               | 1    | 9793<br>(9572 – 10 055) | 29.7<br>(28.9 – 30.6) | 6.1<br>(5.3 – 6.93)      | 478<br>(415 – 548) | 27.9<br>(27.0 – 28.7) | 0.12<br>(0.11 – 0.13) | 22 543<br>(20 547 – 24 392) |
| Southern Latin America      | ..   | ..                      | ..                    | 4.4<br>(3.94 – 4.97)     | ..                 | ..                    | 0.09<br>(0.08 – 0.1)  | ..                          |
| Argentina                   | 0-57 | 1452<br>(1348 – 1567)   | 26.5<br>(25.7 – 27.4) | 4.52<br>(3.9 – 5.32)     | 86<br>(71 – 101)   | 26.4<br>(25.5 – 27.3) | 0.09<br>(0.08 – 0.11) | 4211<br>(3507 – 5052)       |
| Chile                       | 0-59 | 1980<br>(1915 – 2039)   | 26.7<br>(25.9 – 27.5) | 4.04<br>(3.95 – 4.13)    | 131<br>(125 – 138) | 26.4<br>(25.6 – 27.4) | 0.09<br>(0.08 – 0.1)  | 5956<br>(5252 – 6721)       |
| Uruguay                     | 0-7  | 2099<br>(1956 – 2247)   | 26.4<br>(25.5 – 27.3) | 4.71<br>(4.1 – 5.45)     | 118<br>(100 – 139) | 26.3<br>(25.4 – 27.3) | 0.06<br>(0.05 – 0.07) | 9102<br>(7505 – 10 776)     |
| Western Europe              | ..   | ..                      | ..                    | 7.87<br>(7.28 – 8.56)    | ..                 | ..                    | 0.17<br>(0.16 – 0.18) | ..                          |
| Andorra                     | 0-56 | 9155<br>(8439 – 9997)   | 30.5<br>(29.6 – 31.4) | 7.63<br>(6.67 – 8.73)    | 367<br>(311 – 429) | 28.2<br>(27.3 – 29.2) | 0.17<br>(0.14 – 0.21) | 15 054<br>(12 308 – 18 392) |
| Austria                     | 0-91 | 5238<br>(5144 – 5342)   | 29.3<br>(28.4 – 30.1) | 8.19<br>(7.95 – 8.45)    | 187<br>(179 – 196) | 27.7<br>(26.9 – 28.5) | 0.27<br>(0.26 – 0.28) | 5357<br>(5044 – 5663)       |
| Belgium                     | 0-91 | 5009<br>(4846 – 5185)   | 29.0<br>(28.2 – 29.8) | 9.91<br>(9.08 – 10.99)   | 147<br>(131 – 162) | 27.5<br>(26.8 – 28.3) | 0.18<br>(0.17 – 0.19) | 7869<br>(7298 – 8435)       |
| Cyprus                      | 0-72 | 2287<br>(2163 – 2422)   | 27.8<br>(27.0 – 28.6) | 5.81<br>(4.96 – 6.68)    | 110<br>(93 – 130)  | 27.0<br>(26.2 – 27.8) | 0.1<br>(0.09 – 0.12)  | 5938<br>(4956 – 7154)       |
| Denmark                     | 1-09 | 5228<br>(5076 – 5386)   | 29.1<br>(28.4 – 30.0) | 5.69<br>(5.57 – 5.82)    | 267<br>(256 – 281) | 27.6<br>(26.8 – 28.4) | 0.16<br>(0.15 – 0.17) | 9136<br>(8556 – 9721)       |
| Finland                     | 1-02 | 4296<br>(4216 – 4375)   | 28.8<br>(28.1 – 29.6) | 5.41<br>(5.23 – 5.58)    | 229<br>(218 – 240) | 27.5<br>(26.7 – 28.3) | 0.18<br>(0.17 – 0.19) | 6627<br>(6175 – 7104)       |
| France                      | 0-9  | 4821<br>(4728 – 4907)   | 28.7<br>(27.9 – 29.5) | 8.13<br>(7.91 – 8.38)    | 170<br>(163 – 178) | 27.4<br>(26.6 – 28.2) | 0.2<br>(0.19 – 0.22)  | 6576<br>(6049 – 7063)       |
| Germany                     | 0-87 | 5637<br>(5425 – 5857)   | 29.2<br>(28.4 – 29.9) | 10.37<br>(9.43 – 11.41)  | 159<br>(143 – 175) | 27.6<br>(26.8 – 28.4) | 0.26<br>(0.25 – 0.27) | 6050<br>(5674 – 6445)       |
| Greece                      | 0-68 | 2309<br>(2151 – 2479)   | 27.5<br>(26.7 – 28.3) | 5.21<br>(4.48 – 6.15)    | 122<br>(102 – 146) | 26.8<br>(26.1 – 27.7) | 0.2<br>(0.16 – 0.23)  | 3176<br>(2623 – 3857)       |
| Iceland                     | 1-27 | 4447<br>(4260 – 4653)   | 29.1<br>(28.2 – 29.8) | 7.15<br>(6.91 – 7.4)     | 180<br>(171 – 193) | 27.6<br>(26.8 – 28.4) | 0.13<br>(0.12 – 0.14) | 9402<br>(8699 – 10 124)     |
| Ireland                     | 0-92 | 5406<br>(4961 – 5864)   | 29.5<br>(28.7 – 30.4) | 9.37<br>(8.83 – 9.86)    | 170<br>(153 – 189) | 27.8<br>(27.0 – 28.7) | 0.15<br>(0.14 – 0.16) | 10 189<br>(9131 – 11 362)   |
| Israel                      | 1-04 | 2613<br>(2481 – 2767)   | 28.1<br>(27.3 – 28.8) | 8.6<br>(7.55 – 10.0)     | 86<br>(73 – 99)    | 27.1<br>(26.4 – 27.9) | 0.17<br>(0.16 – 0.18) | 4183<br>(3879 – 4499)       |
| Italy                       | 0-82 | 3505<br>(3378 – 3632)   | 28.4<br>(27.7 – 29.2) | 9.69<br>(8.75 – 10.95)   | 103<br>(91 – 115)  | 27.3<br>(26.5 – 28.1) | 0.13<br>(0.12 – 0.14) | 7259<br>(6625 – 7897)       |
| Luxembourg                  | 0-99 | 6708<br>(6306 – 7217)   | 31.6<br>(30.5 – 32.8) | 7.74<br>(7.49 – 7.99)    | 274<br>(253 – 299) | 28.7<br>(27.6 – 29.9) | 0.16<br>(0.15 – 0.17) | 12 262<br>(11 100 – 13 522) |
| Malta                       | 0-66 | 3769<br>(3606 – 3928)   | 28.0<br>(27.2 – 28.7) | 13.78<br>(11.74 – 15.81) | 76<br>(66 – 90)    | 27.1<br>(26.3 – 27.9) | 0.14<br>(0.11 – 0.17) | 7422<br>(6179 – 8997)       |
| Netherlands                 | 0-9  | 5696<br>(5422 – 6005)   | 29.4<br>(28.6 – 30.2) | 5.37<br>(4.98 – 5.81)    | 312<br>(282 – 343) | 27.7<br>(26.9 – 28.6) | 0.13<br>(0.11 – 0.15) | 12 313<br>(10 701 – 14 114) |
| Norway                      | 1-11 | 7071<br>(6791 – 7337)   | 30.4<br>(29.5 – 31.4) | 5.21<br>(5.03 – 5.38)    | 413<br>(388 – 438) | 28.2<br>(27.3 – 29.1) | 0.2<br>(0.19 – 0.21)  | 10 060<br>(9375 – 10 820)   |
| Portugal                    | 0-66 | 2779<br>(2650 – 2916)   | 27.6<br>(26.8 – 28.4) | 5.49<br>(5.05 – 5.87)    | 139<br>(128 – 155) | 26.9<br>(26.1 – 27.7) | 0.11<br>(0.11 – 0.12) | 6610<br>(6121 – 7147)       |
| Spain                       | 0-74 | 3453<br>(3359 – 3544)   | 28.2<br>(27.5 – 29.0) | 7.85<br>(7.02 – 8.83)    | 124<br>(110 – 140) | 27.2<br>(26.4 – 28.0) | 0.12<br>(0.11 – 0.12) | 8027<br>(7567 – 8480)       |
| Sweden                      | 1-02 | 5786<br>(5527 – 6046)   | 29.2<br>(28.4 – 30.0) | 4.21<br>(3.59 – 4.92)    | 402<br>(343 – 467) | 27.6<br>(26.8 – 28.5) | 0.14<br>(0.12 – 0.17) | 11 249<br>(9420 – 13 328)   |
| Switzerland                 | 1-26 | 7654<br>(7379 – 7890)   | 29.9<br>(29.1 – 30.8) | 5.76<br>(5.42 – 6.13)    | 398<br>(369 – 428) | 28.0<br>(27.1 – 28.9) | 0.17<br>(0.16 – 0.18) | 12 421<br>(11 587 – 13 301) |
| United Kingdom              | 0-89 | 4394<br>(4243 – 4571)   | 28.4<br>(27.3 – 30.6) | 5.16<br>(4.47 – 5.89)    | 243<br>(210 – 284) | 27.3<br>(26.4 – 28.5) | 0.13<br>(0.12 – 0.15) | 9037<br>(7699 – 10 398)     |
| Latin America and Caribbean | ..   | ..                      | ..                    | 4.71<br>(4.22 – 5.26)    | ..                 | ..                    | 0.07<br>(0.06 – 0.08) | ..                          |
| Andean Latin America        | ..   | ..                      | ..                    | 5.7<br>(4.85 – 6.96)     | ..                 | ..                    | 0.07<br>(0.06 – 0.08) | ..                          |
| Bolivia                     | 0-44 | 462<br>(439 – 486)      | 28.2<br>(25.8 – 30.8) | 5.36<br>(4.51 – 6.68)    | 25<br>(19 – 30)    | 23.2<br>(21.0 – 25.5) | 0.07<br>(0.06 – 0.08) | 1576<br>(1264 – 1899)       |

|                                  |      |                       |                       |                        |                    |                       |                       |                             |
|----------------------------------|------|-----------------------|-----------------------|------------------------|--------------------|-----------------------|-----------------------|-----------------------------|
| Ecuador                          | 0-54 | 1029<br>(944 – 1126)  | 30-2<br>(27-7 – 32-7) | 5-75<br>(4-82 – 6-91)  | 54<br>(43 – 67)    | 24-1<br>(21-8 – 26-4) | 0-07<br>(0-07 – 0-08) | 3297<br>(2890 – 3777)       |
| Peru                             | 0-47 | 712<br>(672 – 755)    | 30-4<br>(27-9 – 32-9) | 5-8<br>(4-95 – 7-15)   | 38<br>(29 – 45)    | 24-2<br>(21-9 – 26-5) | 0-07<br>(0-06 – 0-08) | 2499<br>(2011 – 3035)       |
| Caribbean                        | ..   | ..                    | ..                    | 3-34<br>(2-87 – 3-84)  | ..                 | ..                    | 0-08<br>(0-06 – 0-09) | ..                          |
| Antigua and Barbuda              | 0-61 | 1250<br>(1176 – 1340) | 32-7<br>(30-2 – 35-5) | 3-69<br>(3-11 – 4-31)  | 111<br>(92 – 136)  | 25-2<br>(22-6 – 27-8) | 0-07<br>(0-06 – 0-08) | 4667<br>(3697 – 5695)       |
| The Bahamas                      | 1-06 | 1842<br>(1720 – 1968) | 33-1<br>(30-5 – 35-9) | 4-48<br>(3-8 – 5-23)   | 136<br>(112 – 167) | 25-3<br>(22-6 – 28-0) | 0-09<br>(0-08 – 0-12) | 4931<br>(3892 – 6170)       |
| Barbados                         | 0-91 | 1295<br>(1234 – 1359) | 31-6<br>(29-0 – 34-2) | 2-5<br>(2-13 – 2-88)   | 164<br>(137 – 197) | 24-7<br>(22-3 – 27-2) | 0-12<br>(0-1 – 0-14)  | 2790<br>(2236 – 3425)       |
| Belize                           | 0-56 | 540<br>(504 – 583)    | 29-3<br>(26-8 – 31-8) | 2-91<br>(2-45 – 3-43)  | 55<br>(44 – 67)    | 23-7<br>(21-4 – 26-0) | 0-05<br>(0-05 – 0-07) | 2368<br>(1883 – 2884)       |
| Bermuda                          | 1-46 | ..                    | ..                    | 3-85<br>(3-28 – 4-48)  | ..                 | ..                    | 0-08<br>(0-07 – 0-1)  | ..                          |
| Cuba                             | 0-48 | 1026<br>(883 – 1189)  | 31-0<br>(28-5 – 33-6) | 3-54<br>(3-03 – 4-06)  | 90<br>(72 – 113)   | 24-4<br>(22-1 – 26-8) | 0-09<br>(0-08 – 0-11) | 2760<br>(2160 – 3595)       |
| Dominica                         | 0-69 | 613<br>(577 – 650)    | 30-2<br>(27-7 – 32-8) | 5-54<br>(4-68 – 6-47)  | 33<br>(27 – 40)    | 24-1<br>(21-8 – 26-3) | 0-07<br>(0-06 – 0-09) | 1995<br>(1587 – 2447)       |
| Dominican Republic               | 0-43 | 985<br>(913 – 1056)   | 30-9<br>(28-3 – 33-4) | 3-29<br>(2-8 – 3-85)   | 92<br>(77 – 112)   | 24-4<br>(22-1 – 26-7) | 0-09<br>(0-07 – 0-1)  | 2760<br>(2180 – 3365)       |
| Grenada                          | 0-68 | 717<br>(671 – 771)    | 30-6<br>(28-0 – 33-2) | 3-31<br>(2-82 – 3-88)  | 66<br>(54 – 81)    | 24-2<br>(22-0 – 26-6) | 0-07<br>(0-06 – 0-09) | 2435<br>(1949 – 2959)       |
| Guyana                           | 0-56 | 335<br>(298 – 379)    | 28-2<br>(25-8 – 30-7) | 4-73<br>(3-94 – 5-5)   | 20<br>(16 – 25)    | 23-2<br>(21-0 – 25-4) | 0-04<br>(0-04 – 0-05) | 1796<br>(1393 – 2278)       |
| Haiti                            | 0-37 | 141<br>(136 – 147)    | 23-8<br>(21-4 – 26-4) | 2-44<br>(2-05 – 2-83)  | 14<br>(11 – 17)    | 21-1<br>(18-9 – 23-7) | 0-05<br>(0-05 – 0-07) | 558<br>(447 – 679)          |
| Jamaica                          | 0-53 | 511<br>(473 – 557)    | 29-4<br>(26-9 – 31-9) | 2-09<br>(1-79 – 2-41)  | 72<br>(59 – 87)    | 23-7<br>(21-4 – 26-0) | 0-03<br>(0-02 – 0-03) | 4186<br>(3349 – 5145)       |
| Puerto Rico                      | 0-94 | ..                    | ..                    | 6-18<br>(5-29 – 7-17)  | ..                 | ..                    | 0-08<br>(0-07 – 0-1)  | ..                          |
| Saint Lucia                      | 0-69 | 735<br>(673 – 795)    | 30-3<br>(27-7 – 32-8) | 4-24<br>(3-6 – 4-93)   | 53<br>(43 – 64)    | 24-1<br>(21-9 – 26-4) | 0-07<br>(0-06 – 0-08) | 2565<br>(2036 – 3158)       |
| Saint Vincent and the Grenadines | 0-61 | 543<br>(519 – 568)    | 30-1<br>(27-6 – 32-6) | 3-31<br>(2-83 – 3-88)  | 49<br>(41 – 60)    | 24-0<br>(21-8 – 26-4) | 0-07<br>(0-06 – 0-09) | 1799<br>(1457 – 2211)       |
| Suriname                         | 0-35 | 881<br>(792 – 968)    | 31-6<br>(29-0 – 34-1) | 3-35<br>(2-85 – 3-88)  | 83<br>(68 – 101)   | 24-7<br>(22-3 – 27-1) | 0-07<br>(0-06 – 0-08) | 3128<br>(2467 – 3886)       |
| Trinidad and Tobago              | 0-5  | 1999<br>(1879 – 2119) | 34-0<br>(31-2 – 37-0) | 2-86<br>(2-44 – 3-33)  | 239<br>(197 – 288) | 25-7<br>(23-0 – 28-5) | 0-11<br>(0-09 – 0-14) | 4557<br>(3604 – 5575)       |
| Virgin Islands U.S.              | 1-75 | ..                    | ..                    | 4-81<br>(4-07 – 5-67)  | ..                 | ..                    | 0-11<br>(0-09 – 0-13) | ..                          |
| Central Latin America            | ..   | ..                    | ..                    | 4-43<br>(3-81 – 5-1)   | ..                 | ..                    | 0-06<br>(0-05 – 0-07) | ..                          |
| Colombia                         | 0-41 | 884<br>(822 – 948)    | 30-8<br>(28-3 – 33-3) | 6-6<br>(5-66 – 7-7)    | 41<br>(34 – 50)    | 24-3<br>(22-0 – 26-7) | 0-04<br>(0-03 – 0-04) | 5897<br>(5084 – 6673)       |
| Costa Rica                       | 0-68 | 1383<br>(1312 – 1459) | 31-2<br>(28-7 – 33-8) | 3-2<br>(2-7 – 3-73)    | 136<br>(111 – 166) | 24-5<br>(22-2 – 27-0) | 0-05<br>(0-05 – 0-07) | 6305<br>(5007 – 7685)       |
| El Salvador                      | 0-48 | 607<br>(575 – 641)    | 29-2<br>(26-7 – 31-7) | 2-01<br>(1-84 – 2-16)  | 88<br>(78 – 100)   | 23-6<br>(21-4 – 25-9) | 0-02<br>(0-02 – 0-02) | 6919<br>(5851 – 8226)       |
| Guatemala                        | 0-52 | 502<br>(478 – 530)    | 28-8<br>(26-3 – 31-4) | 4-59<br>(3-81 – 5-56)  | 32<br>(25 – 39)    | 23-5<br>(21-2 – 25-7) | 0-05<br>(0-04 – 0-07) | 2220<br>(1764 – 2695)       |
| Honduras                         | 0-47 | 382<br>(359 – 409)    | 27-3<br>(24-9 – 29-8) | 4-04<br>(3-36 – 4-73)  | 26<br>(21 – 32)    | 22-8<br>(20-7 – 25-1) | 0-05<br>(0-04 – 0-07) | 1696<br>(1311 – 2134)       |
| Mexico                           | 0-45 | 1113<br>(1063 – 1164) | 31-7<br>(29-1 – 34-3) | 3-71<br>(3-2 – 4-28)   | 95<br>(80 – 112)   | 24-7<br>(22-3 – 27-2) | 0-06<br>(0-05 – 0-07) | 4577<br>(3592 – 5576)       |
| Nicaragua                        | 0-36 | 454<br>(431 – 484)    | 27-3<br>(24-8 – 29-8) | 6-44<br>(5-39 – 7-53)  | 19<br>(16 – 24)    | 22-8<br>(20-6 – 25-0) | 0-05<br>(0-05 – 0-07) | 1907<br>(1511 – 2342)       |
| Panama                           | 0-59 | 1645<br>(1544 – 1745) | 32-3<br>(29-7 – 35-0) | 9-93<br>(8-51 – 11-47) | 54<br>(44 – 65)    | 25-0<br>(22-5 – 27-5) | 0-1<br>(0-08 – 0-12)  | 4095<br>(3338 – 5056)       |
| Venezuela                        | 1    | 530<br>(482 – 590)    | 31-7<br>(29-2 – 34-3) | 3-66<br>(3-08 – 4-3)   | 46<br>(37 – 58)    | 24-7<br>(22-3 – 27-2) | 0-08<br>(0-06 – 0-09) | 1717<br>(1376 – 2124)       |
| Tropical Latin America           | ..   | ..                    | ..                    | 5-05<br>(4-73 – 5-39)  | ..                 | ..                    | 0-08<br>(0-08 – 0-1)  | ..                          |
| Brazil                           | 0-58 | 1408<br>(1352 – 1467) | 31-4<br>(28-8 – 34-0) | 5-09<br>(4-77 – 5-43)  | 87<br>(77 – 97)    | 24-6<br>(22-2 – 27-1) | 0-09<br>(0-08 – 0-1)  | 4054<br>(3403 – 4761)       |
| Paraguay                         | 0-42 | 767<br>(703 – 832)    | 29-3<br>(26-7 – 31-8) | 3-88<br>(3-3 – 4-58)   | 58<br>(47 – 71)    | 23-6<br>(21-4 – 25-9) | 0-06<br>(0-05 – 0-07) | 3009<br>(2402 – 3707)       |
| North Africa and Middle East     | ..   | ..                    | ..                    | 5-72<br>(5-07 – 6-61)  | ..                 | ..                    | 0-1<br>(0-09 – 0-11)  | ..                          |
| Afghanistan                      | 0-29 | 170<br>(154 – 184)    | 20-7<br>(18-0 – 23-5) | 5-59<br>(4-67 – 6-82)  | 6<br>(5 – 8)       | 28-6<br>(24-7 – 32-7) | 0-08<br>(0-07 – 0-1)  | 599<br>(457 – 769)          |
| Algeria                          | 0-27 | 1038<br>(978 – 1095)  | 27-5<br>(24-5 – 30-7) | 4-06<br>(3-45 – 4-8)   | 70<br>(57 – 85)    | 32-6<br>(29-0 – 36-3) | 0-09<br>(0-07 – 0-11) | 3787<br>(2864 – 4793)       |
| Bahrain                          | 0-5  | 2449<br>(2254 – 2641) | 31-4<br>(27-8 – 34-9) | 7-52<br>(6-24 – 9-37)  | 103<br>(79 – 127)  | 34-5<br>(30-7 – 38-3) | 0-04<br>(0-03 – 0-05) | 20 526<br>(15 697 – 25 631) |
| Egypt                            | 0-17 | 505<br>(481 – 532)    | 26-7<br>(23-9 – 29-7) | 7-77<br>(6-61 – 9-58)  | 18<br>(14 – 21)    | 32-2<br>(28-6 – 35-8) | 0-15<br>(0-13 – 0-18) | 1087<br>(860 – 1345)        |
| Iran                             | 0-26 | 1328<br>(1220 – 1445) | 28-2<br>(25-1 – 31-4) | 5-63<br>(4-85 – 6-59)  | 67<br>(54 – 81)    | 33-0<br>(29-4 – 36-7) | 0-06<br>(0-05 – 0-08) | 7217<br>(5582 – 9069)       |
| Iraq                             | 0-33 | 575<br>(498 – 671)    | 27-5<br>(24-5 – 30-7) | 2-15<br>(1-8 – 2-54)   | 74<br>(58 – 94)    | 32-7<br>(29-0 – 36-2) | 0-08<br>(0-06 – 0-1)  | 2387<br>(1762 – 3169)       |

|                                      |      |                       |                       |                         |                    |                       |                       |                             |
|--------------------------------------|------|-----------------------|-----------------------|-------------------------|--------------------|-----------------------|-----------------------|-----------------------------|
| Jordan                               | 0-44 | 761<br>(694 – 837)    | 26-8<br>(23-9 – 29-9) | 3-82<br>(3-2 – 4-56)    | 54<br>(43 – 67)    | 32-3<br>(28-6 – 35-8) | 0-2<br>(0-17 – 0-24)  | 1240<br>(962 – 1571)        |
| Kuwait                               | 0-44 | 2571<br>(2330 – 2804) | 32-9<br>(29-1 – 36-6) | 5-73<br>(4-83 – 7-03)   | 149<br>(117 – 183) | 35-1<br>(31-3 – 39-2) | 0-09<br>(0-07 – 0-11) | 10 690<br>(7952 – 14 003)   |
| Lebanon                              | 0-57 | 1207<br>(1106 – 1322) | 28-0<br>(24-9 – 31-2) | 4-0<br>(3-38 – 4-76)    | 85<br>(67 – 105)   | 32-9<br>(29-3 – 36-5) | 0-08<br>(0-07 – 0-09) | 5140<br>(4048 – 6350)       |
| Libya                                | 0-45 | 642<br>(558 – 732)    | 28-0<br>(24-9 – 31-1) | 5-77<br>(4-97 – 6-86)   | 31<br>(24 – 39)    | 32-9<br>(29-2 – 36-6) | 0-1<br>(0-08 – 0-12)  | 2182<br>(1628 – 2884)       |
| Morocco                              | 0-36 | 474<br>(443 – 509)    | 25-6<br>(22-8 – 28-5) | 3-57<br>(2-97 – 4-35)   | 34<br>(27 – 42)    | 31-6<br>(27-9 – 35-2) | 0-04<br>(0-03 – 0-05) | 3715<br>(2898 – 4670)       |
| Oman                                 | 0-42 | 1678<br>(1496 – 1877) | 31-3<br>(27-8 – 34-7) | 6-58<br>(5-52 – 8-09)   | 80<br>(62 – 101)   | 34-4<br>(30-7 – 38-2) | 0-04<br>(0-03 – 0-05) | 14 217<br>(10 795 – 18 105) |
| Palestine                            | 0-68 | 247<br>(222 – 274)    | 24-0<br>(21-3 – 26-8) | 4-9<br>(4-1 – 5-83)     | 12<br>(10 – 15)    | 30-7<br>(26-9 – 34-3) | 0-08<br>(0-06 – 0-1)  | 964<br>(721 – 1298)         |
| Qatar                                | 0-54 | 3276<br>(2790 – 3782) | 34-6<br>(30-6 – 38-7) | 9-68<br>(7-99 – 11-78)  | 118<br>(89 – 151)  | 35-8<br>(31-8 – 40-2) | 0-09<br>(0-07 – 0-11) | 13 771<br>(9948 – 18 967)   |
| Saudi Arabia                         | 0-4  | 2877<br>(2659 – 3114) | 31-8<br>(28-2 – 35-3) | 6-87<br>(5-95 – 7-94)   | 134<br>(110 – 161) | 34-6<br>(30-9 – 38-5) | 0-08<br>(0-06 – 0-09) | 13 062<br>(10 279 – 16 358) |
| Sudan                                | 0-48 | 281<br>(242 – 329)    | 23-6<br>(20-9 – 26-5) | 4-4<br>(3-7 – 5-4)      | 15<br>(12 – 20)    | 30-5<br>(26-7 – 34-2) | 0-07<br>(0-06 – 0-09) | 1197<br>(898 – 1595)        |
| Syria                                | 0-06 | 246<br>(216 – 276)    | 24-6<br>(21-9 – 27-5) | 4-5<br>(3-84 – 5-37)    | 14<br>(11 – 17)    | 31-1<br>(27-3 – 34-7) | 0-11<br>(0-09 – 0-14) | 673<br>(521 – 866)          |
| Tunisia                              | 0-29 | 821<br>(785 – 857)    | 26-8<br>(23-9 – 29-8) | 5-51<br>(4-73 – 6-57)   | 40<br>(32 – 48)    | 32-3<br>(28-7 – 35-8) | 0-08<br>(0-07 – 0-09) | 3401<br>(2684 – 4247)       |
| Turkey                               | 0-37 | 1054<br>(980 – 1138)  | 28-6<br>(25-5 – 31-8) | 8-82<br>(8-48 – 9-13)   | 34<br>(30 – 39)    | 33-2<br>(29-6 – 36-9) | 0-16<br>(0-15 – 0-17) | 2190<br>(1886 – 2518)       |
| United Arab Emirates                 | 0-57 | 2508<br>(2342 – 2683) | 32-7<br>(29-0 – 36-4) | 6-04<br>(4-86 – 7-74)   | 137<br>(104 – 173) | 35-0<br>(31-2 – 39-0) | 0-07<br>(0-05 – 0-08) | 13 130<br>(10 010 – 16 708) |
| Yemen                                | 0-47 | 185<br>(157 – 217)    | 23-2<br>(20-4 – 26-0) | 2-41<br>(2-14 – 2-68)   | 18<br>(14 – 23)    | 30-2<br>(26-4 – 33-9) | 0-07<br>(0-06 – 0-09) | 804<br>(581 – 1108)         |
| South Asia                           | ..   | ..                    | ..                    | 3-54<br>(2-98 – 4-15)   | ..                 | ..                    | 0-05<br>(0-05 – 0-06) | ..                          |
| Bangladesh                           | 0-36 | 94<br>(89 – 99)       | 18-1<br>(15-9 – 20-3) | 3-52<br>(2-96 – 4-13)   | 5<br>(4 – 6)       | 18-8<br>(16-5 – 21-5) | 0-05<br>(0-05 – 0-07) | 326<br>(257 – 410)          |
| Bhutan                               | 0-31 | 287<br>(264 – 315)    | 20-6<br>(18-2 – 23-1) | 4-19<br>(3-56 – 4-91)   | 14<br>(11 – 17)    | 20-2<br>(17-6 – 23-1) | 0-07<br>(0-06 – 0-08) | 842<br>(667 – 1078)         |
| India                                | 0-26 | 243<br>(238 – 250)    | 19-6<br>(17-4 – 22-0) | 3-41<br>(2-86 – 4-02)   | 14<br>(11 – 17)    | 19-7<br>(17-2 – 22-6) | 0-05<br>(0-05 – 0-06) | 875<br>(731 – 1048)         |
| Nepal                                | 0-29 | 165<br>(154 – 177)    | 17-3<br>(15-2 – 19-4) | 2-21<br>(1-86 – 2-54)   | 13<br>(11 – 16)    | 18-4<br>(16-1 – 21-0) | 0-06<br>(0-05 – 0-07) | 518<br>(411 – 660)          |
| Pakistan                             | 0-27 | 145<br>(135 – 157)    | 19-3<br>(17-1 – 21-7) | 4-63<br>(3-91 – 5-41)   | 6<br>(5 – 7)       | 19-5<br>(17-0 – 22-4) | 0-05<br>(0-05 – 0-07) | 525<br>(399 – 667)          |
| Southeast Asia East Asia and Oceania | ..   | ..                    | ..                    | 5-15<br>(4-72 – 5-61)   | ..                 | ..                    | 0-11<br>(0-1 – 0-12)  | ..                          |
| East Asia                            | ..   | ..                    | ..                    | 5-62<br>(5-26 – 5-99)   | ..                 | ..                    | 0-14<br>(0-13 – 0-16) | ..                          |
| China                                | 0-51 | 839<br>(798 – 878)    | 37-7<br>(35-9 – 39-4) | 5-32<br>(5-0 – 5-64)    | 59<br>(54 – 65)    | 27-8<br>(26-1 – 29-5) | 0-15<br>(0-13 – 0-16) | 1609<br>(1448 – 1790)       |
| North Korea                          | 0-99 | 124<br>(116 – 133)    | 30-7<br>(28-6 – 32-9) | 7-27<br>(6-19 – 8-54)   | 5<br>(4 – 6)       | 25-0<br>(22-9 – 27-1) | 0-13<br>(0-11 – 0-15) | 247<br>(200 – 300)          |
| Taiwan                               | 0-46 | 2268<br>(2010 – 2543) | 41-8<br>(39-5 – 43-8) | 21-0<br>(18-05 – 24-23) | 45<br>(37 – 55)    | 29-3<br>(27-2 – 31-5) | 0-11<br>(0-09 – 0-14) | 5845<br>(4615 – 7279)       |
| Oceania                              | ..   | ..                    | ..                    | 5-39<br>(4-53 – 6-77)   | ..                 | ..                    | 0-06<br>(0-05 – 0-08) | ..                          |
| American Samoa                       | 1    | ..                    | ..                    | 6-69<br>(5-64 – 8-02)   | ..                 | ..                    | 0-06<br>(0-05 – 0-07) | ..                          |
| Federated States of Micronesia       | 0-9  | 281<br>(268 – 295)    | 32-6<br>(30-6 – 34-5) | 5-88<br>(4-96 – 6-92)   | 16<br>(13 – 19)    | 25-8<br>(23-9 – 27-7) | 0-06<br>(0-05 – 0-08) | 1153<br>(931 – 1393)        |
| Fiji                                 | 0-56 | 349<br>(324 – 377)    | 36-2<br>(34-6 – 37-9) | 6-88<br>(5-78 – 8-6)    | 19<br>(15 – 23)    | 27-2<br>(25-5 – 29-0) | 0-06<br>(0-05 – 0-08) | 1509<br>(1208 – 1794)       |
| Guam                                 | 1    | ..                    | ..                    | 7-6<br>(6-56 – 8-92)    | ..                 | ..                    | 0-07<br>(0-06 – 0-09) | ..                          |
| Kiribati                             | 0-78 | 201<br>(177 – 230)    | 30-4<br>(28-2 – 32-6) | 5-2<br>(4-33 – 6-21)    | 12<br>(9 – 15)     | 24-8<br>(22-7 – 27-0) | 0-06<br>(0-05 – 0-07) | 894<br>(702 – 1124)         |
| Marshall Islands                     | 0-94 | 602<br>(568 – 634)    | 33-0<br>(31-1 – 34-9) | 5-81<br>(4-84 – 7-23)   | 35<br>(27 – 42)    | 25-9<br>(24-1 – 27-9) | 0-06<br>(0-05 – 0-07) | 2591<br>(2096 – 3121)       |
| Northern Mariana Islands             | 1    | ..                    | ..                    | 6-92<br>(5-71 – 8-7)    | ..                 | ..                    | 0-06<br>(0-05 – 0-07) | ..                          |
| Papua New Guinea                     | 0-67 | 129<br>(122 – 137)    | 31-6<br>(29-6 – 33-6) | 5-09<br>(4-26 – 6-5)    | 8<br>(6 – 10)      | 25-4<br>(23-4 – 27-4) | 0-06<br>(0-05 – 0-08) | 512<br>(419 – 626)          |
| Samoa                                | 0-67 | 339<br>(313 – 367)    | 34-4<br>(32-7 – 36-1) | 5-87<br>(4-89 – 7-09)   | 20<br>(16 – 25)    | 26-5<br>(24-8 – 28-3) | 0-06<br>(0-05 – 0-07) | 1475<br>(1184 – 1787)       |
| Solomon Islands                      | 0-9  | 155<br>(142 – 168)    | 30-7<br>(28-6 – 32-9) | 5-19<br>(4-3 – 6-16)    | 9<br>(7 – 11)      | 24-9<br>(22-9 – 27-1) | 0-06<br>(0-05 – 0-07) | 693<br>(549 – 851)          |
| Tonga                                | 0-67 | 267<br>(253 – 282)    | 34-2<br>(32-5 – 36-0) | 5-92<br>(5-03 – 7-17)   | 16<br>(13 – 19)    | 26-5<br>(24-7 – 28-3) | 0-06<br>(0-05 – 0-08) | 1111<br>(915 – 1328)        |
| Vanuatu                              | 0-99 | 161<br>(139 – 191)    | 32-2<br>(30-3 – 34-2) | 5-36<br>(4-49 – 6-56)   | 10<br>(7 – 12)     | 25-6<br>(23-8 – 27-6) | 0-06<br>(0-05 – 0-08) | 641<br>(500 – 814)          |
| Southeast Asia                       | ..   | ..                    | ..                    | 4-13<br>(3-49 – 4-9)    | ..                 | ..                    | 0-03<br>(0-02 – 0-03) | ..                          |
| Cambodia                             | 0-33 | 225<br>(208 – 243)    | 32-7<br>(30-8 – 34-7) | 3-93<br>(3-54 – 4-43)   | 19<br>(16 – 22)    | 25-8<br>(24-0 – 27-8) | 0-02<br>(0-02 – 0-02) | 2954<br>(2356 – 3614)       |

|                                  |      |                       |                       |                       |                    |                       |                       |                             |
|----------------------------------|------|-----------------------|-----------------------|-----------------------|--------------------|-----------------------|-----------------------|-----------------------------|
| Indonesia                        | 0-3  | 404<br>(370 – 439)    | 36.9<br>(35.2 – 38.5) | 3.92<br>(3.21 – 4.85) | 38<br>(30 – 48)    | 27.5<br>(25.8 – 29.2) | 0.03<br>(0.02 – 0.04) | 3996<br>(3056 – 5086)       |
| Laos                             | 0-33 | 185<br>(168 – 205)    | 34.4<br>(32.7 – 36.2) | 3.69<br>(3.11 – 4.36) | 17<br>(14 – 21)    | 26.5<br>(24.8 – 28.3) | 0.02<br>(0.02 – 0.02) | 2485<br>(1989 – 3082)       |
| Malaysia                         | 0-33 | 1122<br>(1077 – 1166) | 39.9<br>(37.9 – 41.7) | 8.44<br>(7.14 – 9.89) | 53<br>(44 – 63)    | 28.6<br>(26.8 – 30.6) | 0.03<br>(0.02 – 0.03) | 11 232<br>(9156 – 13 672)   |
| Maldives                         | 0-62 | 1965<br>(1680 – 2262) | 38.0<br>(36.2 – 39.7) | 4.28<br>(3.6 – 5.07)  | 174<br>(137 – 218) | 27.9<br>(26.3 – 29.7) | 0.03<br>(0.02 – 0.03) | 20 651<br>(16 123 – 25 683) |
| Mauritius                        | 0-45 | 1153<br>(1073 – 1235) | 39.0<br>(37.1 – 40.7) | 5.21<br>(4.41 – 6.11) | 87<br>(72 – 105)   | 28.3<br>(26.6 – 30.1) | 0.03<br>(0.03 – 0.04) | 10 051<br>(8136 – 12 381)   |
| Myanmar                          | 0-2  | 310<br>(277 – 348)    | 34.1<br>(32.4 – 35.8) | 4.13<br>(3.48 – 4.86) | 26<br>(21 – 32)    | 26.4<br>(24.6 – 28.2) | 0.02<br>(0.02 – 0.02) | 4124<br>(3287 – 5176)       |
| Philippines                      | 0-36 | 351<br>(330 – 372)    | 35.4<br>(33.7 – 37.1) | 5.19<br>(4.37 – 6.05) | 24<br>(20 – 29)    | 26.9<br>(25.2 – 28.7) | 0.02<br>(0.02 – 0.02) | 4731<br>(3826 – 5748)       |
| Sri Lanka                        | 0-31 | 370<br>(349 – 395)    | 36.9<br>(35.2 – 38.5) | 4.95<br>(4.17 – 5.78) | 28<br>(23 – 33)    | 27.5<br>(25.8 – 29.2) | 0.03<br>(0.03 – 0.04) | 3268<br>(2639 – 3977)       |
| Seychelles                       | 0-53 | 1015<br>(892 – 1141)  | 40.1<br>(38.0 – 41.9) | 4.1<br>(3.54 – 4.67)  | 99<br>(81 – 120)   | 28.7<br>(26.9 – 30.6) | 0.03<br>(0.03 – 0.04) | 9062<br>(7008 – 11 218)     |
| Thailand                         | 0-35 | 640<br>(605 – 680)    | 38.3<br>(36.5 – 40.0) | 2.9<br>(2.45 – 3.38)  | 85<br>(71 – 102)   | 28.0<br>(26.4 – 29.8) | 0.03<br>(0.03 – 0.04) | 5170<br>(4124 – 6381)       |
| Timor-Leste                      | 0-52 | 106<br>(91 – 122)     | 35.0<br>(33.3 – 36.7) | 4.99<br>(4.19 – 6.0)  | 7<br>(6 – 9)       | 26.8<br>(25.1 – 28.5) | 0.03<br>(0.02 – 0.03) | 1114<br>(874 – 1424)        |
| Vietnam                          | 0-34 | 348<br>(326 – 372)    | 34.7<br>(33.0 – 36.4) | 2.91<br>(2.46 – 3.37) | 41<br>(35 – 50)    | 26.6<br>(24.9 – 28.4) | 0.03<br>(0.03 – 0.04) | 2981<br>(2422 – 3641)       |
| Sub-Saharan Africa               | ..   | ..                    | ..                    | 3.74<br>(3.2 – 4.39)  | ..                 | ..                    | 0.06<br>(0.05 – 0.07) | ..                          |
| Central sub-Saharan Africa       | ..   | ..                    | ..                    | 3.65<br>(3.05 – 4.4)  | ..                 | ..                    | 0.07<br>(0.06 – 0.09) | ..                          |
| Angola                           | 0-54 | 201<br>(177 – 226)    | 32.0<br>(30.1 – 33.9) | 3.85<br>(3.18 – 4.49) | 17<br>(13 – 21)    | 24.7<br>(23.1 – 26.7) | 0.07<br>(0.06 – 0.09) | 676<br>(529 – 864)          |
| Central African Republic         | 0-54 | 30<br>(28 – 32)       | 24.0<br>(22.4 – 25.8) | 3.56<br>(2.93 – 4.52) | 2<br>(2 – 3)       | 21.2<br>(19.8 – 22.8) | 0.07<br>(0.06 – 0.09) | 87<br>(68 – 106)            |
| Congo (Brazzaville)              | 0-33 | 180<br>(162 – 199)    | 31.1<br>(29.3 – 32.9) | 4.27<br>(3.6 – 5.22)  | 13<br>(10 – 16)    | 24.4<br>(22.8 – 26.2) | 0.08<br>(0.07 – 0.1)  | 552<br>(437 – 683)          |
| Democratic Republic of the Congo | 0-54 | 43<br>(39 – 48)       | 24.4<br>(22.9 – 26.2) | 3.52<br>(2.92 – 4.32) | 3<br>(2 – 4)       | 21.4<br>(20.0 – 23.0) | 0.07<br>(0.06 – 0.09) | 128<br>(101 – 158)          |
| Equatorial Guinea                | 0-39 | 1044<br>(902 – 1217)  | 37.7<br>(34.7 – 40.8) | 4.86<br>(4.07 – 5.87) | 81<br>(64 – 105)   | 27.1<br>(24.3 – 29.8) | 0.08<br>(0.07 – 0.1)  | 3478<br>(2649 – 4457)       |
| Gabon                            | 0-42 | 495<br>(456 – 542)    | 35.0<br>(32.5 – 37.6) | 4.65<br>(3.88 – 5.71) | 38<br>(30 – 46)    | 26.0<br>(23.8 – 28.3) | 0.09<br>(0.07 – 0.11) | 1447<br>(1170 – 1784)       |
| Eastern sub-Saharan Africa       | ..   | ..                    | ..                    | 4.03<br>(3.46 – 4.7)  | ..                 | ..                    | 0.05<br>(0.04 – 0.06) | ..                          |
| Burundi                          | 0-38 | 64<br>(60 – 69)       | 24.1<br>(22.5 – 25.9) | 6.46<br>(5.43 – 7.85) | 2<br>(2 – 3)       | 21.3<br>(19.8 – 22.9) | 0.06<br>(0.05 – 0.07) | 249<br>(199 – 308)          |
| Comoros                          | 0-49 | 129<br>(118 – 140)    | 26.3<br>(24.8 – 28.0) | 4.44<br>(3.68 – 5.54) | 8<br>(6 – 9)       | 22.3<br>(21.0 – 23.8) | 0.11<br>(0.09 – 0.13) | 265<br>(207 – 329)          |
| Djibouti                         | 0-55 | 151<br>(140 – 164)    | 28.9<br>(27.3 – 30.6) | 4.38<br>(3.62 – 5.4)  | 10<br>(8 – 12)     | 23.5<br>(22.1 – 25.0) | 0.06<br>(0.05 – 0.07) | 622<br>(497 – 754)          |
| Eritrea                          | 0-58 | 40<br>(36 – 46)       | 25.3<br>(23.8 – 27.0) | 4.15<br>(3.46 – 4.91) | 2<br>(2 – 3)       | 21.9<br>(20.5 – 23.4) | 0.05<br>(0.04 – 0.06) | 170<br>(131 – 216)          |
| Ethiopia                         | 0-37 | 84<br>(77 – 92)       | 26.2<br>(24.7 – 27.8) | 3.46<br>(2.86 – 4.08) | 6<br>(5 – 8)       | 22.2<br>(20.9 – 23.8) | 0.03<br>(0.02 – 0.03) | 667<br>(531 – 851)          |
| Kenya                            | 0-45 | 189<br>(182 – 197)    | 28.7<br>(27.2 – 30.4) | 4.01<br>(3.43 – 4.76) | 14<br>(11 – 16)    | 23.4<br>(22.0 – 24.9) | 0.04<br>(0.04 – 0.05) | 1048<br>(846 – 1245)        |
| Madagascar                       | 0-27 | 82<br>(74 – 91)       | 26.0<br>(24.5 – 27.6) | 4.17<br>(3.45 – 5.28) | 5<br>(4 – 6)       | 22.2<br>(20.8 – 23.7) | 0.05<br>(0.04 – 0.06) | 386<br>(308 – 490)          |
| Malawi                           | 0-24 | 143<br>(139 – 148)    | 25.3<br>(23.7 – 26.9) | 3.17<br>(2.63 – 3.79) | 11<br>(10 – 14)    | 21.8<br>(20.4 – 23.4) | 0.05<br>(0.04 – 0.06) | 601<br>(489 – 710)          |
| Mozambique                       | 0-3  | 87<br>(84 – 91)       | 25.3<br>(23.8 – 27.0) | 3.92<br>(3.28 – 4.71) | 6<br>(5 – 7)       | 21.9<br>(20.4 – 23.4) | 0.05<br>(0.04 – 0.06) | 386<br>(309 – 472)          |
| Rwanda                           | 0-36 | 156<br>(148 – 165)    | 26.6<br>(25.1 – 28.3) | 5.47<br>(5.03 – 5.92) | 8<br>(7 – 8)       | 22.4<br>(21.1 – 24.0) | 0.03<br>(0.02 – 0.03) | 1378<br>(1106 – 1718)       |
| Somalia                          | 0-49 | 47<br>(46 – 48)       | 23.0<br>(21.3 – 24.9) | 3.77<br>(3.12 – 4.56) | 3<br>(2 – 4)       | 20.8<br>(19.2 – 22.5) | 0.05<br>(0.04 – 0.06) | 202<br>(158 – 251)          |
| South Sudan                      | 0-08 | 106<br>(102 – 110)    | 28.6<br>(27.0 – 30.3) | 3.56<br>(2.98 – 4.37) | 9<br>(7 – 10)      | 23.4<br>(21.9 – 24.9) | 0.06<br>(0.05 – 0.07) | 439<br>(348 – 537)          |
| Tanzania                         | 0-3  | 166<br>(151 – 185)    | 28.0<br>(26.5 – 29.7) | 5.02<br>(4.17 – 6.03) | 9<br>(8 – 11)      | 23.1<br>(21.7 – 24.6) | 0.09<br>(0.08 – 0.11) | 415<br>(328 – 515)          |
| Uganda                           | 0-3  | 165<br>(150 – 181)    | 27.1<br>(25.6 – 28.7) | 4.13<br>(3.82 – 4.44) | 11<br>(10 – 12)    | 22.7<br>(21.3 – 24.2) | 0.05<br>(0.04 – 0.05) | 780<br>(658 – 909)          |
| Zambia                           | 0-33 | 244<br>(228 – 261)    | 29.5<br>(27.9 – 31.2) | 2.83<br>(2.32 – 3.49) | 26<br>(20 – 32)    | 23.7<br>(22.3 – 25.3) | 0.06<br>(0.05 – 0.08) | 904<br>(721 – 1103)         |
| Southern sub-Saharan Africa      | ..   | ..                    | ..                    | 3.08<br>(2.61 – 3.61) | ..                 | ..                    | 0.12<br>(0.09 – 0.15) | ..                          |
| Botswana                         | 0-41 | 1038<br>(951 – 1127)  | 34.6<br>(32.2 – 37.1) | 3.29<br>(2.75 – 3.94) | 109<br>(89 – 134)  | 25.8<br>(23.7 – 28.2) | 0.07<br>(0.06 – 0.09) | 3777<br>(2935 – 4698)       |
| Lesotho                          | 0-36 | 272<br>(261 – 284)    | 28.2<br>(26.7 – 30.0) | 2.79<br>(2.32 – 3.35) | 28<br>(22 – 34)    | 23.2<br>(21.8 – 24.7) | 0.07<br>(0.05 – 0.08) | 974<br>(787 – 1203)         |
| Namibia                          | 0-44 | 1046<br>(965 – 1125)  | 33.1<br>(31.0 – 35.3) | 3.03<br>(2.54 – 3.61) | 115<br>(93 – 139)  | 25.2<br>(23.4 – 27.3) | 0.09<br>(0.07 – 0.11) | 2997<br>(2395 – 3697)       |
| South Africa                     | 0-42 | 1121<br>(1069 – 1179) | 33.9<br>(31.7 – 36.3) | 3.24<br>(2.76 – 3.78) | 118<br>(98 – 140)  | 25.5<br>(23.6 – 27.8) | 0.14<br>(0.11 – 0.19) | 2060<br>(1513 – 2739)       |

|                            |       |                    |                       |                       |                  |                       |                       |                       |
|----------------------------|-------|--------------------|-----------------------|-----------------------|------------------|-----------------------|-----------------------|-----------------------|
| Swaziland (eSwatini)       | 0-36  | 718<br>(650 – 804) | 32.4<br>(30.4 – 34.4) | 2.92<br>(2.43 – 3.52) | 80<br>(65 – 100) | 24.9<br>(23.2 – 27.0) | 0.04<br>(0.03 – 0.04) | 5141<br>(4059 – 6549) |
| Zimbabwe                   | 0-51  | 196<br>(181 – 214) | 27.0<br>(25.5 – 28.7) | 2.58<br>(2.15 – 3.12) | 21<br>(17 – 25)  | 22.6<br>(21.3 – 24.2) | 0.06<br>(0.05 – 0.07) | 769<br>(611 – 951)    |
| Western sub-Saharan Africa | ..    | ..                 | ..                    | 3.62<br>(3.06 – 4.3)  | ..               | ..                    | 0.06<br>(0.05 – 0.07) | ..                    |
| Benin                      | 0-36  | 88<br>(84 – 91)    | 27.3<br>(25.8 – 29.0) | 3.66<br>(3.09 – 4.32) | 7<br>(5 – 8)     | 22.8<br>(21.4 – 24.3) | 0.05<br>(0.04 – 0.06) | 400<br>(320 – 481)    |
| Burkina Faso               | 0-35  | 97<br>(92 – 101)   | 26.6<br>(25.1 – 28.2) | 1.84<br>(1.53 – 2.18) | 14<br>(12 – 17)  | 22.4<br>(21.1 – 24.0) | 0.05<br>(0.04 – 0.07) | 402<br>(325 – 499)    |
| Cameroon                   | 0-38  | 156<br>(147 – 169) | 28.6<br>(27.1 – 30.3) | 3.98<br>(3.28 – 5.03) | 11<br>(9 – 14)   | 23.4<br>(22.0 – 24.9) | 0.06<br>(0.05 – 0.07) | 608<br>(489 – 735)    |
| Cape Verde                 | 0-46  | 380<br>(354 – 407) | 31.5<br>(29.7 – 33.4) | 5.01<br>(4.23 – 6.02) | 24<br>(19 – 28)  | 24.6<br>(22.9 – 26.4) | 0.07<br>(0.06 – 0.08) | 1360<br>(1090 – 1638) |
| Chad                       | 0-35  | 105<br>(96 – 114)  | 27.7<br>(26.1 – 29.4) | 3.45<br>(2.87 – 4.36) | 8<br>(7 – 10)    | 22.9<br>(21.6 – 24.5) | 0.05<br>(0.04 – 0.06) | 525<br>(412 – 659)    |
| Cote d'Ivoire              | 0-4   | 184<br>(168 – 202) | 28.9<br>(27.4 – 30.7) | 3.84<br>(3.18 – 4.59) | 14<br>(11 – 17)  | 23.5<br>(22.1 – 25.0) | 0.06<br>(0.05 – 0.07) | 699<br>(571 – 862)    |
| The Gambia                 | 0-26  | 135<br>(127 – 144) | 26.7<br>(25.2 – 28.3) | 4.86<br>(4.04 – 5.77) | 7<br>(6 – 9)     | 22.5<br>(21.1 – 24.1) | 0.06<br>(0.05 – 0.07) | 551<br>(438 – 669)    |
| Ghana                      | 0-32  | 248<br>(226 – 272) | 29.6<br>(27.9 – 31.4) | 4.12<br>(3.79 – 4.45) | 18<br>(16 – 20)  | 23.8<br>(22.4 – 25.4) | 0.04<br>(0.03 – 0.04) | 1635<br>(1311 – 1954) |
| Guinea                     | 0-35  | 65<br>(62 – 69)    | 25.8<br>(24.3 – 27.4) | 3.57<br>(2.98 – 4.28) | 5<br>(4 – 6)     | 22.1<br>(20.7 – 23.6) | 0.05<br>(0.04 – 0.06) | 282<br>(226 – 344)    |
| Guinea-Bissau              | 0-4   | 115<br>(107 – 125) | 26.1<br>(24.7 – 27.7) | 3.65<br>(3.07 – 4.35) | 8<br>(7 – 10)    | 22.2<br>(20.9 – 23.8) | 0.06<br>(0.05 – 0.07) | 460<br>(366 – 571)    |
| Liberia                    | 13-72 | 191<br>(185 – 199) | 24.3<br>(22.8 – 26.1) | 3.62<br>(3.04 – 4.35) | 13<br>(10 – 16)  | 21.4<br>(20.0 – 23.0) | 0.06<br>(0.05 – 0.07) | 736<br>(591 – 907)    |
| Mali                       | 0-36  | 114<br>(108 – 120) | 27.2<br>(25.8 – 29.0) | 2.64<br>(2.34 – 2.96) | 12<br>(10 – 14)  | 22.7<br>(21.4 – 24.3) | 0.04<br>(0.03 – 0.04) | 680<br>(593 – 771)    |
| Mauritania                 | 0-29  | 179<br>(165 – 192) | 29.6<br>(27.9 – 31.3) | 4.12<br>(3.42 – 4.97) | 13<br>(10 – 16)  | 23.8<br>(22.3 – 25.4) | 0.07<br>(0.06 – 0.08) | 645<br>(514 – 791)    |
| Niger                      | 0-37  | 69<br>(66 – 72)    | 24.7<br>(23.2 – 26.4) | 3.05<br>(2.49 – 3.78) | 6<br>(5 – 7)     | 21.6<br>(20.1 – 23.2) | 0.06<br>(0.05 – 0.07) | 268<br>(211 – 327)    |
| Nigeria                    | 0-32  | 222<br>(200 – 246) | 31.0<br>(29.3 – 32.9) | 3.67<br>(3.02 – 4.44) | 19<br>(15 – 24)  | 24.4<br>(22.8 – 26.1) | 0.07<br>(0.05 – 0.08) | 830<br>(650 – 1023)   |
| Sao Tome and Principe      | 0-53  | 228<br>(210 – 250) | 28.9<br>(27.3 – 30.6) | 3.92<br>(3.27 – 4.77) | 17<br>(13 – 21)  | 23.5<br>(22.1 – 25.0) | 0.07<br>(0.06 – 0.08) | 793<br>(631 – 977)    |
| Senegal                    | 0-37  | 123<br>(116 – 130) | 27.9<br>(26.4 – 29.6) | 3.67<br>(3.11 – 4.36) | 9<br>(8 – 11)    | 23.0<br>(21.7 – 24.6) | 0.04<br>(0.04 – 0.05) | 664<br>(531 – 811)    |
| Sierra Leone               | 0-3   | 188<br>(170 – 210) | 26.5<br>(25.0 – 28.1) | 6.68<br>(5.55 – 8.23) | 8<br>(6 – 9)     | 22.4<br>(21.0 – 24.0) | 0.05<br>(0.04 – 0.06) | 815<br>(639 – 1009)   |
| Togo                       | 0-37  | 101<br>(95 – 108)  | 26.1<br>(24.6 – 27.7) | 3.79<br>(3.19 – 4.59) | 7<br>(6 – 8)     | 22.2<br>(20.9 – 23.8) | 0.06<br>(0.05 – 0.07) | 400<br>(325 – 493)    |

## Section 7. Cost of universal health coverage

### 7.1. Introduction

We estimated the additional services and cost needed to meet a UHC standard for utilisation. The metric for the units of service needed was based on the 2016 volume of services per disability-adjusted-life-year (DALY) from the GBD 2016. For a given standard of utilisation per DALY, the additional units of service needed to meet the UHC standard was calculated for each country, and multiplied by the unit cost of the service in that country.

$$Cost_{ijkl} = \left( \left( \frac{volume_{standardjkl}}{DALYs_{standardkl}} \right) - \left( \frac{volume_{ijkl}}{DALYs_{ikl}} \right) \right) * DALYs_{ikl} * unitcost_{ij} \quad (8)$$

Where  $i$  refers to country,  $j$  to the service (outpatient or inpatient),  $k$  to age category, and  $l$  to sex.

The cost for a country was the sum of additional costs for each age category and sex that did not meet the outpatient and/or inpatient standard. A service-age-sex was included in the cost estimate if the average utilisation per DALY was less than the standard. The total cost was the sum across all countries that did not meet the standard for at least one service-age-sex category.

Two key steps to perform the calculation were to: 1) address the endogeneity of DALYs, and 2) identify a UHC standard for utilisation. A country's burden of disease is endogenous to health service utilisation in the sense that better access to and quality of care will reduce the burden. Consequently, we standardised the burden of disease across countries by removing the effects of access to and quality of care. We based our UHC standard for utilisation of personal health services on the performance of a current health system and described the methods for selecting it.

### 7.2. DALYs in the absence of health services

To estimate DALYs in the absence of personal health care, we regressed 2016 DALYs per capita on the SDI and a measure of health access and quality, and then created a counterfactual measure of DALYs using the predictions with the health access and quality measure set to zero. We used the GBD's Health Access and Quality (HAQ) index<sup>27,28</sup> as our measure of health access and quality, with two adaptations. The HAQ index was based on mortality from 32 causes that were amenable to health care; the same 32 causes that were used in the construction of the GBD UHC index. The GBD 2016 HAQ index was constructed with the mortality to incidence ratio for eight neoplasms, and the risk-standardised mortality rates for each the other 24 causes.<sup>27</sup>

The first adaptation was to create the HAQ index by age category using the GBD 2016 mortality results and risk adjustments, rather than using the age-standardised GBD 2016 index. The causes included in the index differed across age categories, for example GBD only reports mortality from neonatal disorders for ages 0-11 months. Consequently, the 2016 GBD HAQ cause weights for each age category were normalised to sum to one. The age-specific HAQ index was not calculated for 75 or more years of age, because the amenable age categories in the GBD 2016 HAQ index were from zero to 74 years.

The second adaptation was to calculate the difference between the observed HAQ index value, and the frontier value of the HAQ index for given SDI.<sup>28</sup> The difference is a measure access and quality after controlling for SDI. We used the ratio of the observed HAQ index value and the frontier for a given SDI in our regression estimates (Table S15). The HAQ index and SDI were highly correlated (correlation coefficient = 0.94). The ratio of the observed HAQ value and the frontier was moderately correlated with SDI (correlation coefficient = 0.18) and produced stable regression estimates. Total number of DALYs averted for each country in 2015 due to the presence of healthcare are reported in the Table S16.

**Table S15. Regression results for disability-adjusted-life-year per person as a function of age-specific Health Access and Quality index, and Socio-demographic Index by age and sex, 2016**

Table displays coefficient estimates for the regression of Socio-demographic Index (SDI) and HAQ index over HAQ index frontier on disability-adjusted-life-years. The HAQ index frontier represents the highest expected HAQ to be achieved at a given SDI level for a given age-sex group. Results reported in bold text indicate statistical significance at  $p < 0.05$ . SDI = Socio-demographic Index, HAQ = Health Access and Quality,  $R^2$  = R-squared (coefficient of determination).

| Age Group      | Sex    | Intercept     | Coefficient of the ratio of observed HAQ index value to HAQ index frontier at the country's SDI | SDI coefficient | R <sup>2</sup> |
|----------------|--------|---------------|-------------------------------------------------------------------------------------------------|-----------------|----------------|
| Early Neonatal | Male   | <b>176.45</b> | <b>-120.58</b>                                                                                  | <b>-35.61</b>   | 0.89           |
| Early Neonatal | Female | <b>132.52</b> | <b>-91.47</b>                                                                                   | <b>-25.97</b>   | 0.89           |
| Late Neonatal  | Male   | <b>16.66</b>  | <b>-11.50</b>                                                                                   | <b>-3.20</b>    | 0.85           |
| Late Neonatal  | Female | <b>14.88</b>  | <b>-10.66</b>                                                                                   | <b>-2.60</b>    | 0.85           |
| Post Neonatal  | Male   | <b>4.34</b>   | <b>-3.26</b>                                                                                    | <b>-0.81</b>    | 0.77           |
| Post Neonatal  | Female | <b>3.82</b>   | <b>-2.82</b>                                                                                    | <b>-0.75</b>    | 0.75           |
| 1 to 4         | Male   | <b>1.39</b>   | <b>-1.17</b>                                                                                    | <b>-0.18</b>    | 0.69           |
| 1 to 4         | Female | <b>1.27</b>   | <b>-1.07</b>                                                                                    | <b>-0.17</b>    | 0.68           |
| 5 to 9         | Male   | <b>0.27</b>   | <b>-0.17</b>                                                                                    | <b>-0.04</b>    | 0.77           |
| 5 to 9         | Female | <b>0.23</b>   | <b>-0.14</b>                                                                                    | <b>-0.04</b>    | 0.75           |
| 10 to 14       | Male   | <b>0.27</b>   | <b>-0.17</b>                                                                                    | <b>-0.03</b>    | 0.77           |
| 10 to 14       | Female | <b>0.25</b>   | <b>-0.15</b>                                                                                    | <b>-0.02</b>    | 0.72           |
| 15 to 19       | Male   | <b>0.33</b>   | <b>-0.17</b>                                                                                    | <b>-0.04</b>    | 0.53           |
| 15 to 19       | Female | <b>0.25</b>   | <b>-0.11</b>                                                                                    | <b>-0.03</b>    | 0.59           |
| 20 to 24       | Male   | <b>0.37</b>   | <b>-0.16</b>                                                                                    | <b>-0.05</b>    | 0.40           |
| 20 to 24       | Female | <b>0.30</b>   | <b>-0.14</b>                                                                                    | <b>-0.04</b>    | 0.54           |
| 25 to 29       | Male   | <b>0.50</b>   | <b>-0.28</b>                                                                                    | <b>-0.06</b>    | 0.46           |
| 25 to 29       | Female | <b>0.41</b>   | <b>-0.23</b>                                                                                    | <b>-0.05</b>    | 0.43           |
| 30 to 34       | Male   | <b>0.67</b>   | <b>-0.43</b>                                                                                    | <b>-0.07</b>    | 0.46           |
| 30 to 34       | Female | <b>0.54</b>   | <b>-0.35</b>                                                                                    | <b>-0.06</b>    | 0.43           |
| 35 to 39       | Male   | <b>0.86</b>   | <b>-0.59</b>                                                                                    | <b>-0.09</b>    | 0.52           |
| 35 to 39       | Female | <b>0.68</b>   | <b>-0.45</b>                                                                                    | <b>-0.07</b>    | 0.53           |
| 40 to 44       | Male   | <b>1.01</b>   | <b>-0.71</b>                                                                                    | <b>-0.10</b>    | 0.59           |
| 40 to 44       | Female | <b>0.76</b>   | <b>-0.50</b>                                                                                    | <b>-0.08</b>    | 0.64           |
| 45 to 49       | Male   | <b>1.17</b>   | <b>-0.79</b>                                                                                    | <b>-0.11</b>    | 0.65           |
| 45 to 49       | Female | <b>0.84</b>   | <b>-0.53</b>                                                                                    | <b>-0.10</b>    | 0.75           |
| 50 to 54       | Male   | <b>1.30</b>   | <b>-0.85</b>                                                                                    | <b>-0.12</b>    | 0.63           |
| 50 to 54       | Female | <b>0.97</b>   | <b>-0.59</b>                                                                                    | <b>-0.12</b>    | 0.80           |
| 55 to 59       | Male   | <b>1.41</b>   | <b>-0.85</b>                                                                                    | <b>-0.13</b>    | 0.63           |
| 55 to 59       | Female | <b>1.06</b>   | <b>-0.60</b>                                                                                    | <b>-0.14</b>    | 0.82           |
| 60 to 64       | Male   | <b>1.51</b>   | <b>-0.82</b>                                                                                    | <b>-0.15</b>    | 0.60           |
| 60 to 64       | Female | <b>1.18</b>   | <b>-0.62</b>                                                                                    | <b>-0.18</b>    | 0.82           |
| 65 to 69       | Male   | <b>1.65</b>   | <b>-0.79</b>                                                                                    | <b>-0.18</b>    | 0.58           |

|          |        |             |              |              |      |
|----------|--------|-------------|--------------|--------------|------|
| 65 to 69 | Female | <b>1.41</b> | <b>-0.69</b> | <b>-0.22</b> | 0.81 |
| 70 to 74 | Male   | <b>1.79</b> | <b>-0.71</b> | <b>-0.22</b> | 0.57 |
| 70 to 74 | Female | <b>1.65</b> | <b>-0.73</b> | <b>-0.28</b> | 0.79 |
| 75+      | Male   | n/a         | n/a          | n/a          | n/a  |
| 75+      | Female | n/a         | n/a          | n/a          | n/a  |



**Table S16. Total DALYs averted due to the presence of healthcare, 2015**

Table presents the difference between the DALYs in the absence of healthcare and the total DALYs observed. Uncertainty intervals represented by the 2.5<sup>th</sup> and 97.5<sup>th</sup> percentile of the draws. DALY= Disability adjusted life year.

| <b>Table S16: Total DALYs averted due to the presence of healthcare, 2015</b> |                                                                |
|-------------------------------------------------------------------------------|----------------------------------------------------------------|
| <b>Location name</b>                                                          | <b>DALYs averted due to healthcare (in thousands) (95% UI)</b> |
| Global                                                                        | ..                                                             |
| Central Europe, Eastern Europe, and Central Asia                              | ..                                                             |
| Central Asia                                                                  | ..                                                             |
| Armenia                                                                       | 1563<br>(1449 – 1660)                                          |
| Azerbaijan                                                                    | 4891<br>(4442 – 5339)                                          |
| Georgia                                                                       | 2036<br>(1865 – 2206)                                          |
| Kazakhstan                                                                    | 8843<br>(7954 – 9626)                                          |
| Kyrgyzstan                                                                    | 3377<br>(3154 – 3592)                                          |
| Mongolia                                                                      | 1516<br>(1348 – 1646)                                          |
| Tajikistan                                                                    | 4406<br>(3905 – 4833)                                          |
| Turkmenistan                                                                  | 2358<br>(2107 – 2592)                                          |
| Uzbekistan                                                                    | 15 531<br>(14 038 – 16 903)                                    |
| Central Europe                                                                | ..                                                             |
| Albania                                                                       | 1535<br>(1426 – 1635)                                          |
| Bosnia and Herzegovina                                                        | 1952<br>(1795 – 2098)                                          |
| Bulgaria                                                                      | 3274<br>(2967 – 3586)                                          |
| Croatia                                                                       | 1976<br>(1811 – 2136)                                          |
| Czech Republic                                                                | 4949<br>(4554 – 5338)                                          |
| Hungary                                                                       | 4459<br>(4072 – 4857)                                          |
| Macedonia                                                                     | 1030<br>(954 – 1101)                                           |
| Montenegro                                                                    | 301<br>(280 – 323)                                             |
| Poland                                                                        | 16 159<br>(14 704 – 17 524)                                    |
| Romania                                                                       | 8761<br>(7989 – 9506)                                          |
| Serbia                                                                        | 4326<br>(3983 – 4633)                                          |
| Slovakia                                                                      | 2386<br>(2161 – 2590)                                          |
| Slovenia                                                                      | 969<br>(892 – 1048)                                            |
| Eastern Europe                                                                | ..                                                             |
| Belarus                                                                       | 4614<br>(4146 – 5086)                                          |
| Estonia                                                                       | 560<br>(507 – 608)                                             |
| Latvia                                                                        | 860<br>(778 – 940)                                             |

|                           |                                |
|---------------------------|--------------------------------|
| Lithuania                 | 1164<br>(1050 – 1268)          |
| Moldova                   | 2008<br>(1837 – 2181)          |
| Russia                    | 64 758<br>(51 978 – 76 256)    |
| Ukraine                   | 21 788<br>(18 747 – 24 448)    |
| High-income               | ..                             |
| Australasia               | ..                             |
| Australia                 | 11 707<br>(10 898 – 12 534)    |
| New Zealand               | 2250<br>(2079 – 2405)          |
| High-income Asia-Pacific  | ..                             |
| Brunei                    | 166<br>(149 – 182)             |
| Japan                     | 58 354<br>(53 919 – 62 262)    |
| Singapore                 | 1774<br>(1643 – 1912)          |
| South Korea               | 22 644<br>(20 460 – 24 676)    |
| High-income North America | ..                             |
| Canada                    | 17 139<br>(15 878 – 18 321)    |
| Greenland                 | 24<br>(22 – 27)                |
| United States             | 143 864<br>(131 186 – 154 913) |
| Southern Latin America    | ..                             |
| Argentina                 | 21 060<br>(19 571 – 22 442)    |
| Chile                     | 9205<br>(8457 – 9915)          |
| Uruguay                   | 1700<br>(1587 – 1804)          |
| Western Europe            | ..                             |
| Andorra                   | 36<br>(33 – 39)                |
| Austria                   | 4115<br>(3800 – 4405)          |
| Belgium                   | 5250<br>(4841 – 5646)          |
| Cyprus                    | 405<br>(373 – 434)             |
| Denmark                   | 2623<br>(2417 – 2833)          |
| Finland                   | 2678<br>(2468 – 2880)          |
| France                    | 29 913<br>(27 538 – 31 955)    |
| Germany                   | 37 209<br>(34 078 – 40 253)    |
| Greece                    | 5298<br>(4935 – 5641)          |
| Iceland                   | 162<br>(150 – 174)             |
| Ireland                   | 2276<br>(2103 – 2428)          |
| Israel                    | 4139<br>(3843 – 4426)          |
| Italy                     | 29 745<br>(27 619 – 31 679)    |
| Luxembourg                | 281<br>(260 – 300)             |
| Malta                     | 201<br>(185 – 216)             |
| Netherlands               | 8344<br>(7728 – 8977)          |

|                                  |                             |
|----------------------------------|-----------------------------|
| Norway                           | 2584<br>(2397 – 2760)       |
| Portugal                         | 5246<br>(4860 – 5585)       |
| Spain                            | 23 294<br>(21 738 – 24 752) |
| Sweden                           | 4773<br>(4393 – 5127)       |
| Switzerland                      | 4124<br>(3807 – 4447)       |
| United Kingdom                   | 30 874<br>(28 552 – 33 110) |
| Latin America and Caribbean      | ..                          |
| Andean Latin America             | ..                          |
| Bolivia                          | 4784<br>(4288 – 5240)       |
| Ecuador                          | 8325<br>(7724 – 8856)       |
| Peru                             | 17 251<br>(16 101 – 18 314) |
| Caribbean                        | ..                          |
| Antigua and Barbuda              | 42<br>(39 – 45)             |
| The Bahamas                      | 172<br>(156 – 187)          |
| Barbados                         | 127<br>(115 – 137)          |
| Belize                           | 189<br>(170 – 205)          |
| Bermuda                          | 31<br>(28 – 33)             |
| Cuba                             | 6362<br>(5963 – 6757)       |
| Dominica                         | 32<br>(29 – 35)             |
| Dominican Republic               | 5060<br>(4649 – 5430)       |
| Grenada                          | 45<br>(41 – 49)             |
| Guyana                           | 315<br>(283 – 347)          |
| Haiti                            | 4145<br>(3083 – 4979)       |
| Jamaica                          | 1385<br>(1251 – 1510)       |
| Puerto Rico                      | 1609<br>(1478 – 1726)       |
| Saint Lucia                      | 81<br>(74 – 87)             |
| Saint Vincent and the Grenadines | 52<br>(47 – 56)             |
| Suriname                         | 232<br>(205 – 257)          |
| Trinidad and Tobago              | 590<br>(532 – 643)          |
| Virgin Islands U.S.              | 47<br>(42 – 51)             |
| Central Latin America            | ..                          |
| Colombia                         | 25 865<br>(24 238 – 27 325) |
| Costa Rica                       | 2563<br>(2414 – 2709)       |
| El Salvador                      | 3151<br>(2930 – 3355)       |
| Guatemala                        | 8156<br>(7444 – 8870)       |
| Honduras                         | 3933<br>(3553 – 4270)       |
| Mexico                           | 65 880<br>(61 936 – 69 498) |

|                                      |                                |
|--------------------------------------|--------------------------------|
| Nicaragua                            | 3452<br>(3240 – 3656)          |
| Panama                               | 2000<br>(1854 – 2133)          |
| Venezuela                            | 16 130<br>(14 885 – 17 225)    |
| Tropical Latin America               | ..                             |
| Brazil                               | 88 540<br>(81 458 – 95 429)    |
| Paraguay                             | 3047<br>(2816 – 3280)          |
| North Africa and Middle East         | ..                             |
| Afghanistan                          | 14 701<br>(11 590 – 17 574)    |
| Algeria                              | 19 792<br>(18 148 – 21 307)    |
| Bahrain                              | 716<br>(658 – 770)             |
| Egypt                                | 51 214<br>(47 343 – 55 008)    |
| Iran                                 | 43 334<br>(39 055 – 47 087)    |
| Iraq                                 | 22 181<br>(19 117 – 25 348)    |
| Jordan                               | 4539<br>(4244 – 4830)          |
| Kuwait                               | 1959<br>(1808 – 2114)          |
| Lebanon                              | 3280<br>(3063 – 3494)          |
| Libya                                | 3007<br>(2761 – 3231)          |
| Morocco                              | 16 217<br>(14 891 – 17 445)    |
| Oman                                 | 2492<br>(2309 – 2669)          |
| Palestine                            | 3621<br>(3350 – 3893)          |
| Qatar                                | 1132<br>(1036 – 1223)          |
| Saudi Arabia                         | 14 666<br>(13 395 – 15 720)    |
| Sudan                                | 17 294<br>(13 831 – 19 767)    |
| Syria                                | 9306<br>(6818 – 11 748)        |
| Tunisia                              | 5796<br>(5360 – 6186)          |
| Turkey                               | 39 596<br>(36 406 – 42 426)    |
| United Arab Emirates                 | 4793<br>(4299 – 5223)          |
| Yemen                                | 15 763<br>(13 342 – 18 139)    |
| South Asia                           | ..                             |
| Bangladesh                           | 85 049<br>(79 336 – 90 625)    |
| Bhutan                               | 348<br>(315 – 380)             |
| India                                | 512 823<br>(463 012 – 556 191) |
| Nepal                                | 15 797<br>(14 516 – 17 024)    |
| Pakistan                             | 82 981<br>(73 591 – 91 998)    |
| Southeast Asia East Asia and Oceania | ..                             |
| East Asia                            | ..                             |
| China                                | 734 620<br>(689 037 – 776 947) |

|                                  |                               |
|----------------------------------|-------------------------------|
| North Korea                      | 15 010<br>(13 781 – 16 080)   |
| Taiwan                           | 10 142<br>(9205 – 10 959)     |
| Oceania                          | ..                            |
| American Samoa                   | 36<br>(33 – 39)               |
| Federated States of Micronesia   | 38<br>(32 – 44)               |
| Fiji                             | 329<br>(270 – 385)            |
| Guam                             | 76<br>(68 – 83)               |
| Kiribati                         | 38<br>(28 – 46)               |
| Marshall Islands                 | 34<br>(29 – 38)               |
| Northern Mariana Islands         | 66<br>(61 – 71)               |
| Papua New Guinea                 | 3320<br>(2553 – 3936)         |
| Samoa                            | 102<br>(93 – 110)             |
| Solomon Islands                  | 273<br>(236 – 307)            |
| Tonga                            | 47<br>(42 – 52)               |
| Vanuatu                          | 121<br>(102 – 137)            |
| Southeast Asia                   | ..                            |
| Cambodia                         | 7143<br>(6520 – 7734)         |
| Indonesia                        | 100 690<br>(91 722 – 108 652) |
| Laos                             | 3021<br>(2046 – 3694)         |
| Malaysia                         | 13 727<br>(12 748 – 14 710)   |
| Maldives                         | 198<br>(185 – 210)            |
| Mauritius                        | 597<br>(544 – 651)            |
| Myanmar                          | 22 284<br>(19 824 – 24 405)   |
| Philippines                      | 46 552<br>(42 667 – 50 337)   |
| Sri Lanka                        | 11 066<br>(10 194 – 11 842)   |
| Seychelles                       | 49<br>(45 – 53)               |
| Thailand                         | 34 515<br>(32 191 – 36 954)   |
| Timor-Leste                      | 563<br>(488 – 630)            |
| Vietnam                          | 48 779<br>(45 501 – 52 008)   |
| Sub-Saharan Africa               | ..                            |
| Central sub-Saharan Africa       | ..                            |
| Angola                           | 13 171<br>(10 504 – 15 534)   |
| Central African Republic         | 1741<br>(941 – 2375)          |
| Congo (Brazzaville)              | 1948<br>(1576 – 2292)         |
| Democratic Republic of the Congo | 41 529<br>(30 229 – 51 659)   |
| Equatorial Guinea                | 360<br>(290 – 423)            |
| Gabon                            | 725<br>(617 – 830)            |

|                             |                             |
|-----------------------------|-----------------------------|
| Eastern sub-Saharan Africa  | ..                          |
| Burundi                     | 5951<br>(4351 – 7096)       |
| Comoros                     | 322<br>(283 – 358)          |
| Djibouti                    | 464<br>(380 – 537)          |
| Eritrea                     | 2241<br>(1928 – 2513)       |
| Ethiopia                    | 51 689<br>(47 071 – 56 402) |
| Kenya                       | 20 881<br>(19 301 – 22 460) |
| Madagascar                  | 12 367<br>(10 549 – 14 116) |
| Malawi                      | 9556<br>(8163 – 10 797)     |
| Mozambique                  | 15 142<br>(13 062 – 17 143) |
| Rwanda                      | 5982<br>(5324 – 6553)       |
| Somalia                     | 3314<br>(2375 – 4121)       |
| South Sudan                 | 7786<br>(6058 – 9295)       |
| Tanzania                    | 26 453<br>(23 593 – 29 131) |
| Uganda                      | 20 136<br>(17 817 – 22 151) |
| Zambia                      | 6896<br>(5681 – 7999)       |
| Southern sub-Saharan Africa | ..                          |
| Botswana                    | 1039<br>(870 – 1222)        |
| Lesotho                     | 780<br>(540 – 994)          |
| Namibia                     | 1095<br>(922 – 1246)        |
| South Africa                | 20 994<br>(18 434 – 23 295) |
| Swaziland (eSwatini)        | 561<br>(443 – 666)          |
| Zimbabwe                    | 6763<br>(5818 – 7632)       |
| Western sub-Saharan Africa  | ..                          |
| Benin                       | 5710<br>(5006 – 6380)       |
| Burkina Faso                | 9941<br>(7779 – 12 070)     |
| Cameroon                    | 9550<br>(7513 – 11 370)     |
| Cape Verde                  | 306<br>(284 – 327)          |
| Chad                        | 6869<br>(5738 – 7883)       |
| Cote d'Ivoire               | 9381<br>(7460 – 11 099)     |
| The Gambia                  | 1087<br>(974 – 1193)        |
| Ghana                       | 12 951<br>(11 408 – 14 343) |
| Guinea                      | 5767<br>(4820 – 6603)       |
| Guinea-Bissau               | 807<br>(699 – 907)          |
| Liberia                     | 2539<br>(2282 – 2764)       |
| Mali                        | 11 173<br>(9555 – 12 637)   |

|                       |                              |
|-----------------------|------------------------------|
| Mauritania            | 1885<br>(1701 – 2050)        |
| Niger                 | 12 663<br>(10 787 – 14 188)  |
| Nigeria               | 87 294<br>(73 106 – 100 119) |
| Sao Tome and Principe | 100<br>(91 – 108)            |
| Senegal               | 7705<br>(7041 – 8341)        |
| Sierra Leone          | 2920<br>(2483 – 3294)        |
| Togo                  | 3362<br>(2902 – 3784)        |

### 7.3. Identifying the UHC standard for utilisation

To identify our UHC standard of utilisation of personal health services, we calculated the total cost of attaining the standard using each country as the standard. When countries with lower utilisation per DALY were the standard, the total cost decreased for two reasons: fewer additional services were needed, and the service-age-sex results in fewer countries did not meet the standard. We created a scatter plot with the GBD 2016 UHC index and logarithm of total cost of attaining the standard (Figure S13). Countries to the left represented lower total cost to meet the UHC standard for a given UHC index score.

Six countries stood out for their combination of low cost for achieving a UHC standard for utilisation and high score on the UHC index: four in the highest quintile of the UHC index (Switzerland, Finland, Sweden, and the Netherlands), and two in the second quintile (Portugal, and Lebanon). Comparing the health system statistics, the ratio of total volume of visits to total counterfactual DALYs ranged from 7.88 in Switzerland to 5.16 in Lebanon, a 35% difference (Table S17). There was a broader range for inpatient admissions; the ratio of total volume of admissions to total counterfactual DALYs ranged from 0.24 in Switzerland to 0.10 in Lebanon, a 58% difference. Among the countries on the frontier, the utilisation of inpatient services distinguished the countries with higher costs for achieving a UHC standard and higher scores on the UHC index from the others.

**Figure S13. Total cost to reach universal health coverage using each country as a standard, by Socio-demographic Index quintile**

The total cost to reach universal health coverage (UHC) was calculated for all countries using each country as a standard. Countries that were above the standard with respect to outpatient and inpatient utilisation were not included in the total cost calculation for that standard. Results are plotted against UHC index. Countries with relatively low costs to reach UHC for a given UHC index are labelled.

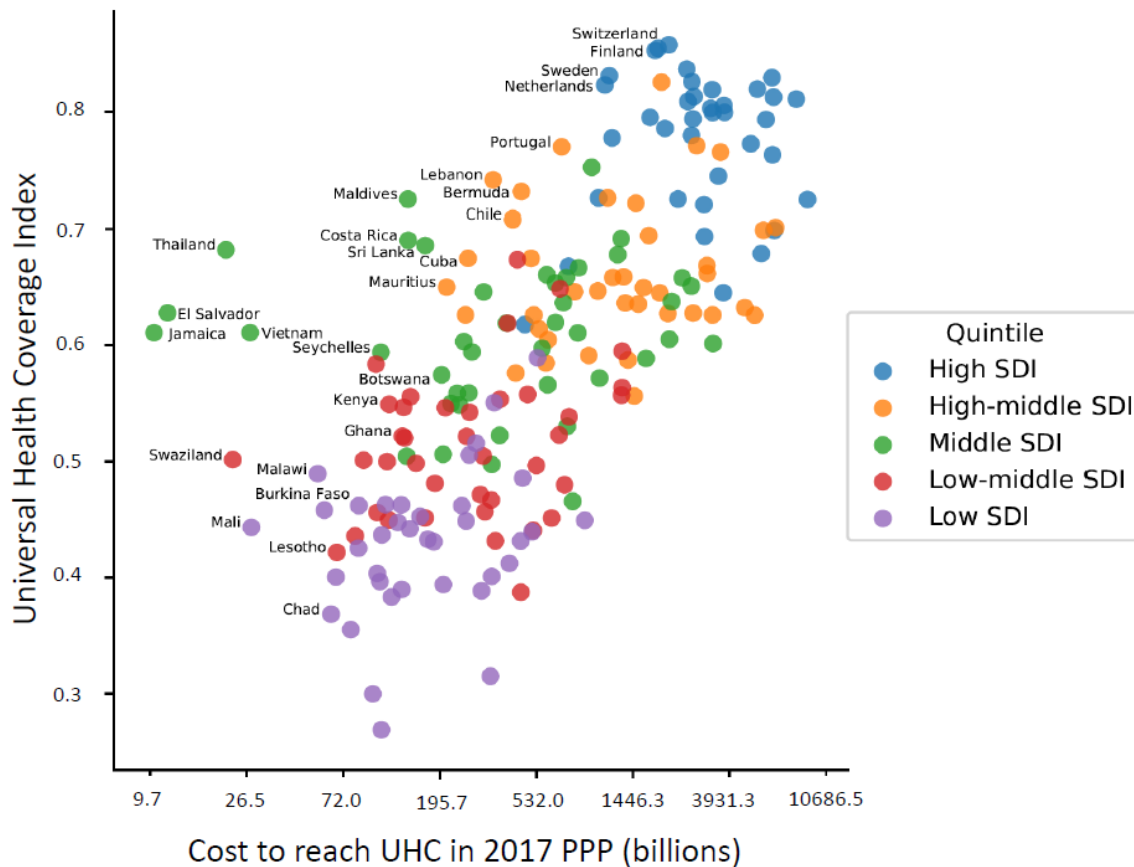



**Table S17. Preliminary estimates of funds needed to achieve universal health coverage in 2016 using utilisation per DALY of six countries by World Bank income group in 2017 international dollars**

Total additional cost of reaching the UHC standard for 188 countries was calculated with utilisation per DALY of for six countries with a high scores on the UHC index, and low total additional cost estimates. DALY=disability-adjusted-life-year, UHC=Universal Health Coverage

|             |                    |                                    |                                               |                                                   | Total additional cost to meet UHC standard for utilisation in billions of international dollars by World Bank income group |                     |                     |             |         |
|-------------|--------------------|------------------------------------|-----------------------------------------------|---------------------------------------------------|----------------------------------------------------------------------------------------------------------------------------|---------------------|---------------------|-------------|---------|
| Country     | GBD 2016 UHC index | Country rank by GBD 2016 UHC index | Ratio of total visits to counterfactual DALYs | Ratio of total admissions to counterfactual DALYs | Low income                                                                                                                 | Lower middle income | Upper middle income | High income | Total   |
| Switzerland | 0.86               | 1                                  | 7.88                                          | 0.24                                              | 69.01                                                                                                                      | 692.65              | 757.12              | 798.23      | 2317.01 |
| Finland     | 0.85               | 3                                  | 7.16                                          | 0.24                                              | 60.39                                                                                                                      | 616.83              | 632.97              | 669.45      | 1979.65 |
| Sweden      | 0.83               | 5                                  | 5.70                                          | 0.19                                              | 51.58                                                                                                                      | 488.72              | 391.77              | 313.55      | 1245.62 |
| Netherlands | 0.82               | 9                                  | 7.25                                          | 0.17                                              | 47.09                                                                                                                      | 456.04              | 408.36              | 266.21      | 1177.69 |
| Portugal    | 0.77               | 29                                 | 7.01                                          | 0.14                                              | 34.72                                                                                                                      | 336.02              | 278.14              | 96.71       | 745.59  |
| Lebanon     | 0.74               | 34                                 | 5.16                                          | 0.10                                              | 17.05                                                                                                                      | 176                 | 105.15              | 59.41       | 357.6   |

Estimates of additional cost of reaching the UHC standard for utilisation among the six countries were ranked from highest (2017 international \$2,317 billion) to lowest (\$357 billion). Within this range, much of difference reflected the high unit costs in high income countries, where the cost was 13-fold higher in Switzerland (\$798 billion) than Lebanon (\$59 billion). In low income countries, the cost were four times higher in Switzerland (\$69 billion) than Lebanon (\$18 billion). In estimates using the utilisation per DALY from two countries in the middle of the range (Sweden and Netherlands) the range of costs was narrower; the cost in low-income countries ranged from \$51 to \$47 billion, lower-middle income countries ranged from \$489 to \$456 billion, upper middle income countries from \$408 to \$392 billion, and high income countries from \$314 to \$266 billion.

The Netherlands, in the middle of the range, was selected as the standard with a ratio of 7.25 total visits to total counterfactual DALYs, and 0.17 total admissions to total counterfactual DALYs. The key to our method was to select a standard that represented the performance of a country rather than an ideal. Other countries could arguably have been selected. Portugal in the second quintile of the UHC index would serve as an intermediate UHC standard for utilisation with a smaller ratio of admissions to counterfactual DALYs and lower additional cost of inpatient admissions, and we conducted a sensitivity analysis using it as a standard. Switzerland with the highest score on the UHC index would serve as an extreme UHC standard, implying that only one country with the highest score on the UHC index had universal coverage.

The ratios for each service-age-sex in the Netherlands (Table S18) were used in the UHC calculations, rather than the aggregate ratio:

$$Cost_{ijkl} = \left( \left( \frac{volume_{Netherlandsjkl}}{DALY0s_{Netherlandskl}} \right) - \left( \frac{volume_{ijkl}}{DALY0s_{ikl}} \right) \right) * DALY0s_{ikl} * unitcost_{ij} \quad (9)$$

where  $DALY_0$  denotes the counterfactual DALYs with health access and quality removed,  $i$  refers country,  $j$  to the service (outpatient or inpatient),  $k$  to age category, and  $l$  to sex. The ratio of counterfactual DALYs to actual DALYs was highest for children 0 to 4 years of age, meaning that health service access and quality reduced DALYs for these age categories. Conversely the ratio of utilisation to counterfactual DALY was lowest for them, meaning that health services had a large effect on the burden of disease.

The ratio of volume to counterfactual DALYs varied across locations and age categories. Comparing the ratios for the Netherlands to the summary results by GBD super-regions shows the size of the gaps by locations and age categories (Figures S14 and S15). The highest ratios were in the Central Europe, Eastern Europe, and Central Asia, and High Income super-regions, and lowest were in the South Asia and sub-Saharan Africa super-regions. Across age categories, the highest ratios were among children 5 to 9 years of age. The ratio of admissions per counterfactual DALY was also high among women of child-bearing age. Note that countries with relatively high aggregate ratios of total utilisation to counterfactual DALY still had gaps for specific service-age-sex ratios.

**Table S18. Inpatient and outpatient utilisation per counterfactual disability-adjusted-life-year by age and sex for the Netherlands**

Counterfactual DALYs were estimated using a linear regression model to predict disability-adjusted-life-years (DALYs) in a scenario where the Health Access and Quality index was 0. The linear regression model included two covariates: Socio-demographic Index and HAQ index over HAQ frontier. The HAQ index frontier represents the highest expected HAQ to be achieved at a given SDI level for a given age-sex group. Using these counterfactual DALY estimates, we calculated total outpatient and inpatient visits per counterfactual DALY by age and sex for the Netherlands. We also calculated the ratio of counterfactual DALYs to actual DALYs, or DALYs reported in the Global Burden of Disease 2016. OP = outpatient, IP= inpatient, DALY = disability-adjusted-life-year.

| Age Group Name | Sex    | OP utilisation per counterfactual DALY | IP utilisation per counterfactual DALY | counterfactual DALYs/actual DALYs |
|----------------|--------|----------------------------------------|----------------------------------------|-----------------------------------|
| Early neonatal | male   | 0.039                                  | 0.003                                  | 13.764                            |
|                | female | 0.068                                  | 0.003                                  | 12.850                            |
| Late neonatal  | male   | 0.401                                  | 0.028                                  | 11.628                            |
|                | female | 0.579                                  | 0.025                                  | 12.037                            |
| Post neonatal  | male   | 1.473                                  | 0.095                                  | 27.919                            |
|                | female | 2.301                                  | 0.094                                  | 29.348                            |
| 1 to 4         | male   | 3.720                                  | 0.147                                  | 27.115                            |
|                | female | 5.660                                  | 0.139                                  | 27.284                            |
| 5 to 9         | male   | 19.387                                 | 0.456                                  | 4.838                             |
|                | female | 33.249                                 | 0.477                                  | 4.469                             |
| 10 to 14       | male   | 15.357                                 | 0.269                                  | 3.568                             |
|                | female | 27.057                                 | 0.316                                  | 3.112                             |
| 15 to 19       | male   | 12.516                                 | 0.222                                  | 2.773                             |
|                | female | 26.554                                 | 0.376                                  | 2.091                             |
| 20 to 24       | male   | 12.285                                 | 0.228                                  | 2.454                             |
|                | female | 22.351                                 | 0.413                                  | 2.148                             |
| 25 to 29       | male   | 8.162                                  | 0.154                                  | 3.388                             |
|                | female | 15.765                                 | 0.330                                  | 2.752                             |
| 30 to 34       | male   | 5.720                                  | 0.116                                  | 4.332                             |
|                | female | 11.964                                 | 0.245                                  | 3.292                             |
| 35 to 39       | male   | 4.766                                  | 0.100                                  | 5.098                             |
|                | female | 9.665                                  | 0.177                                  | 3.698                             |
| 40 to 44       | male   | 4.595                                  | 0.096                                  | 5.168                             |
|                | female | 8.944                                  | 0.143                                  | 3.580                             |
| 45 to 49       | male   | 4.600                                  | 0.099                                  | 4.799                             |
|                | female | 8.560                                  | 0.123                                  | 3.348                             |
| 50 to 54       | male   | 4.551                                  | 0.104                                  | 4.215                             |
|                | female | 7.851                                  | 0.107                                  | 3.227                             |
| 55 to 59       | male   | 4.607                                  | 0.124                                  | 3.504                             |
|                | female | 7.742                                  | 0.125                                  | 2.968                             |
| 60 to 64       | male   | 4.852                                  | 0.143                                  | 2.885                             |

|          |        |        |       |       |
|----------|--------|--------|-------|-------|
|          | female | 7.709  | 0.155 | 2.721 |
| 65 to 69 | male   | 5.060  | 0.156 | 2.398 |
|          | female | 7.211  | 0.186 | 2.610 |
| 70 to 74 | male   | 5.440  | 0.205 | 1.945 |
|          | female | 6.959  | 0.210 | 2.366 |
| 75 to 79 | male   | 8.754  | 0.411 | 1.000 |
|          | female | 13.922 | 0.460 | 1.000 |
| 80 to 84 | male   | 7.236  | 0.381 | 1.000 |
|          | female | 11.250 | 0.424 | 1.000 |
| 85 to 89 | male   | 6.442  | 0.344 | 1.000 |
|          | female | 9.044  | 0.369 | 1.000 |
| 90 to 94 | male   | 5.856  | 0.332 | 1.000 |
|          | female | 7.445  | 0.336 | 1.000 |
| 95+      | male   | 5.793  | 0.355 | 1.000 |
|          | female | 6.547  | 0.335 | 1.000 |

**Figure S14. Global and GBD super-region estimates of the volume of outpatient visits per counterfactual disability-adjusted-life-year by age, sex, 2016**

Counterfactual DALYs were estimated using a linear regression model to predict disability-adjusted-life-years (DALYs) in a scenario where the Health Access and Quality index was 0. The linear regression model included two covariates: Socio-demographic Index and HAQ index over HAQ frontier. The HAQ index frontier represents the highest expected HAQ to be achieved at a given SDI level for a given age-sex group. Using these counterfactual DALY estimates, we calculated total outpatient visits per counterfactual DALY for each age-sex group globally and for each GBD super-region. OP = outpatient, DALY = disability-adjusted-life-year.

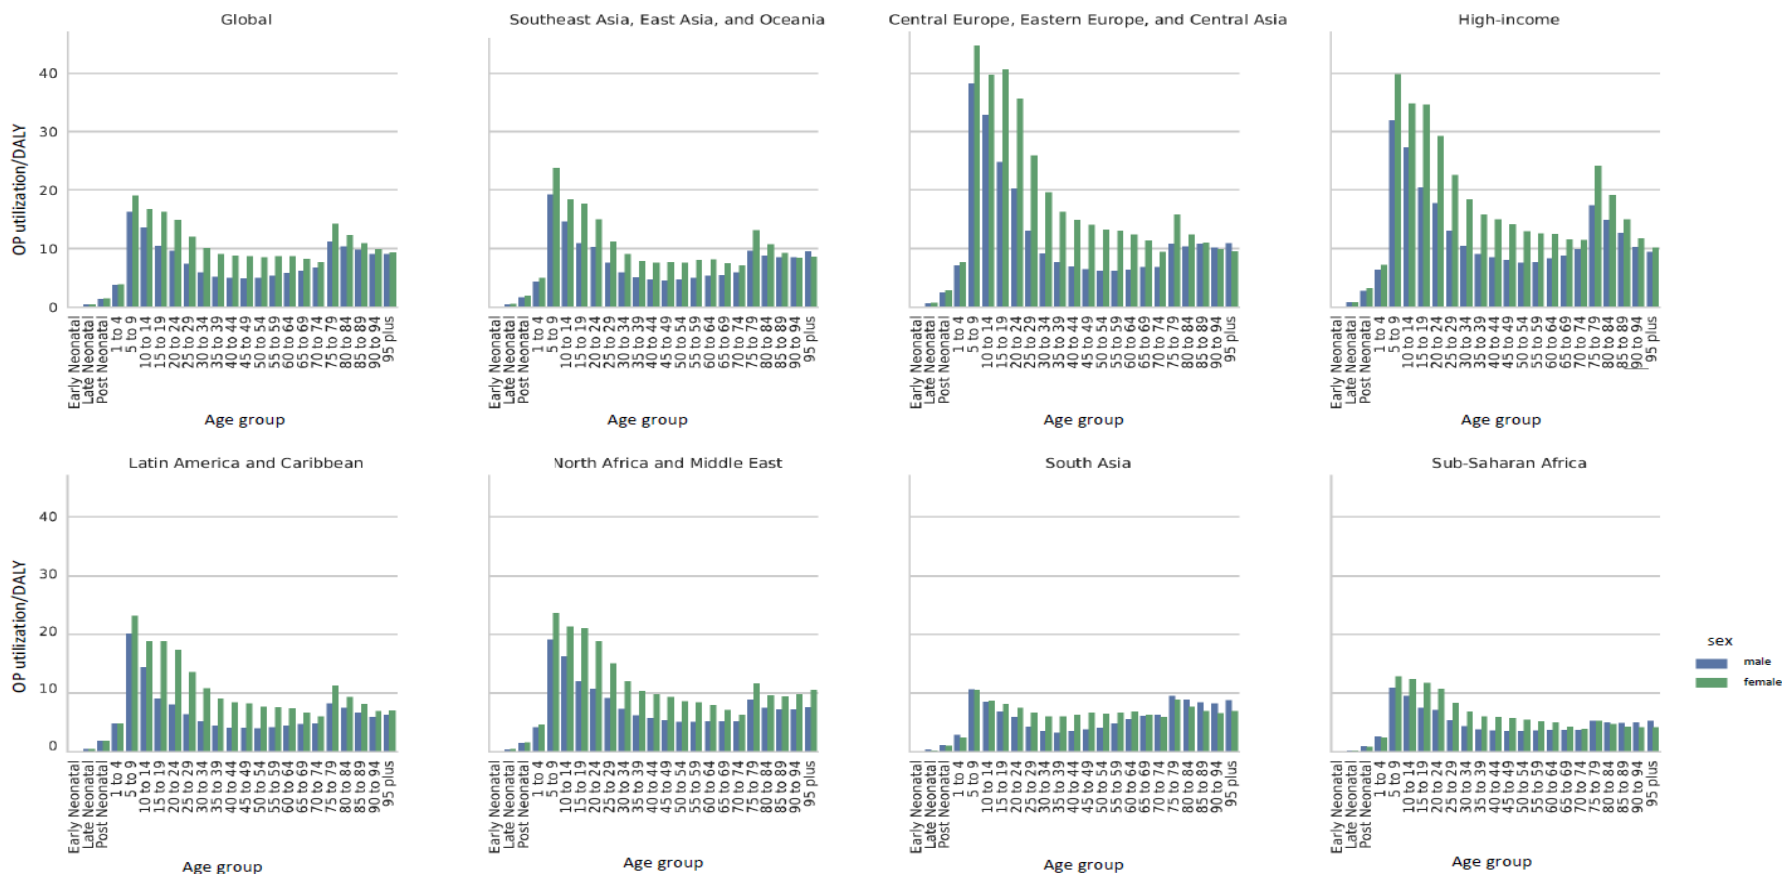

**Figure S15. Global and GBD super-region estimates of the volume of outpatient visits per counterfactual disability-adjusted-life-year by age, sex, 2016**

Counterfactual DALYs were estimated using a linear regression model to predict disability-adjusted-life-years (DALYs) in a scenario where the Health Access and Quality index was 0. The linear regression model included two covariates: Socio-demographic Index and HAQ index over HAQ frontier. The HAQ index frontier represents the highest expected HAQ to be achieved at a given SDI level for a given age-sex group. Using these counterfactual DALY estimates, we calculated total inpatient admissions per counterfactual DALY for each age-sex group globally and for each GBD super-region. IP = inpatient, DALY = disability-adjusted-life-year.

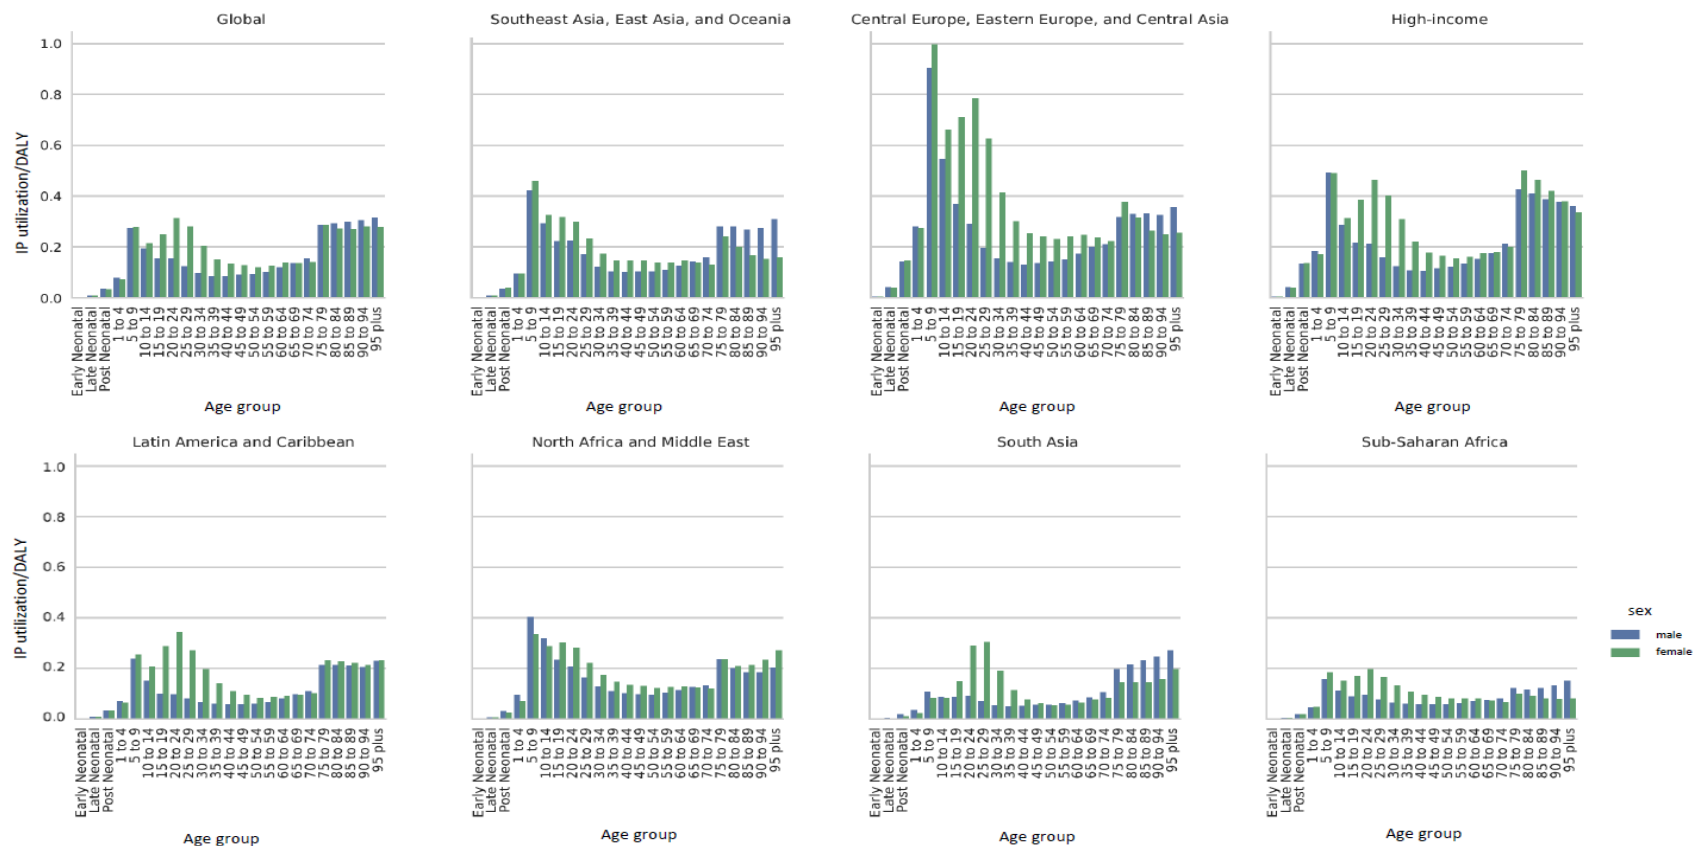

#### 7.4. Main analysis

The costs with the Netherlands as the standard were estimated in international dollars (Table 1) and United States dollars (Table S19). Unit costs that are less for US\$0.50 are reported as zero.

**Table S19. National unit costs of outpatient visits and inpatient admissions, utilisation per counterfactual disability-adjusted-life-year, and additional visits, admissions, and funds needed to achieve a Universal Health Coverage standard for utilisation in 2016 in 2017 United States dollars**

Table displays four sets of national estimates organised by GBD region: 1) cost per outpatient visit and inpatient admission by country in 2016 in 2017 United States dollars, 2) aggregate ratio of total outpatient visits and inpatient admissions to counterfactual DALYs, where the counterfactual DALYs standardised the burden of disease across countries by removing the effects of access and quality of health care, 3) estimates of additional services needed to achieve the UHC standard for utilisation calculated by age and sex category, and 4) total cost of additional services in 2017 United States dollars. The cost of scaling up to the UHC utilisation standard was done at the age-sex level, leading some countries to have a cost of UHC scale-up greater than zero despite their aggregate utilisation per counterfactual DALY being greater than the standard set by the Netherlands. For each result, the mean of 1,000 draws is reported, and in parenthesis the uncertainty interval defined as the 2.5<sup>th</sup> and 97.5<sup>th</sup> percentile of draws. DALY = disability-adjusted-life-year. GBD= Global Burden of Disease, UHC = Universal Health Coverage.

**Table S19: National unit costs of outpatient visits and inpatient admissions, utilisation per counterfactual disability-adjusted-life-year, and additional visits, admissions, and funds needed to achieve a Universal Health Coverage standard for utilisation in 2016 in 2017 United States dollars**

|                                                  | Outpatient visits                                    |                                                    |                                                                                     | Inpatient admissions                                    |                                                   |                                                                                        | Total additional cost to meet UHC standards in millions 2017 \$US (95% UI) |
|--------------------------------------------------|------------------------------------------------------|----------------------------------------------------|-------------------------------------------------------------------------------------|---------------------------------------------------------|---------------------------------------------------|----------------------------------------------------------------------------------------|----------------------------------------------------------------------------|
|                                                  | Unit cost per outpatient visit in 2017 US\$ (95% UI) | Outpatient utilization per DALY (95% UI) (Table 1) | Additional outpatient visits to meet UHC standard (95% UI) (in thousands) (Table 1) | Unit cost per inpatient admission in 2017 US\$ (95% UI) | Inpatient utilization per DALY (95% UI) (Table 1) | Additional inpatient admissions to meet UHC standard (95% UI) (in thousands) (Table 1) |                                                                            |
| Global                                           | ..                                                   | 6-7<br>(6-04 – 7-41)                               | 10 415 092<br>(7 809 849 – 12 742 483)                                              | ..                                                      | 0-12<br>(0-11 – 0-13)                             | 348 465<br>(306 581 – 383 242)                                                         | 575 567<br>(413 343 – 739 587)                                             |
| Low income                                       | ..                                                   | ..                                                 | 1 956 058<br>(1 552 914 – 2 280 749)                                                | ..                                                      | ..                                                | 61 106<br>(54 415 – 66 067)                                                            | 16 200<br>(12 767 – 19 362)                                                |
| Lower middle income                              | ..                                                   | ..                                                 | 6 224 613<br>(4 643 059 – 7 683 756)                                                | ..                                                      | ..                                                | 214 966<br>(194 755 – 231 539)                                                         | 141 901<br>(113 480 – 171 287)                                             |
| Upper middle income                              | ..                                                   | ..                                                 | 2 023 229<br>(1 418 055 – 2 614 556)                                                | ..                                                      | ..                                                | 59 265<br>(46 625 – 70 696)                                                            | 176 598<br>(135 310 – 216 521)                                             |
| High income                                      | ..                                                   | ..                                                 | 211 192<br>(83 151 – 330 668)                                                       | ..                                                      | ..                                                | 13 128<br>(6499 – 18 933)                                                              | 240 867<br>(135 989 – 343 474)                                             |
| Central Europe, Eastern Europe, and Central Asia | ..                                                   | 10-82<br>(10-37 – 11-31)                           | 116 530<br>(86 387 – 145 714)                                                       | ..                                                      | 0-24<br>(0-23 – 0-25)                             | 4372<br>(2820 – 6017)                                                                  | 4534<br>(3284 – 5949)                                                      |
| Central Asia                                     | ..                                                   | 8-25<br>(7-95 – 8-54)                              | 54 694<br>(48 267 – 61 347)                                                         | ..                                                      | 0-17<br>(0-17 – 0-18)                             | 1745<br>(1556 – 1936)                                                                  | 1824<br>(1616 – 2031)                                                      |
| Armenia                                          | 19<br>(16 – 23)                                      | 4-86<br>(4-67 – 5-05)                              | 5691<br>(5076 – 6307)                                                               | 691<br>(574 – 812)                                      | 0-16<br>(0-16 – 0-17)                             | 63<br>(51 – 75)                                                                        | 155<br>(124 – 188)                                                         |
| Azerbaijan                                       | 14<br>(12 – 16)                                      | 5-8<br>(5-53 – 6-08)                               | 9910<br>(8076 – 11 755)                                                             | 1093<br>(960 – 1241)                                    | 0-08<br>(0-08 – 0-09)                             | 581<br>(539 – 621)                                                                     | 776<br>(660 – 901)                                                         |
| Georgia                                          | 11<br>(9 – 14)                                       | 7-13<br>(6-13 – 8-43)                              | 1736<br>(359 – 3125)                                                                | 880<br>(775 – 991)                                      | 0-11<br>(0-1 – 0-11)                              | 209<br>(185 – 232)                                                                     | 206<br>(165 – 251)                                                         |
| Kazakhstan                                       | 12<br>(11 – 13)                                      | 8-27<br>(7-91 – 8-65)                              | 2937<br>(1224 – 4814)                                                               | 579<br>(526 – 633)                                      | 0-19<br>(0-18 – 0-2)                              | 217<br>(163 – 277)                                                                     | 162<br>(118 – 214)                                                         |
| Kyrgyzstan                                       | 5<br>(5 – 6)                                         | 4-06<br>(3-91 – 4-22)                              | 14 137<br>(12 960 – 15 301)                                                         | 159<br>(142 – 179)                                      | 0-17<br>(0-17 – 0-18)                             | 83<br>(60 – 103)                                                                       | 89<br>(77 – 103)                                                           |
| Mongolia                                         | 6<br>(5 – 7)                                         | 6-39<br>(5-38 – 7-61)                              | 1669<br>(388 – 2868)                                                                | 253<br>(200 – 314)                                      | 0-18<br>(0-15 – 0-22)                             | 32<br>(14 – 48)                                                                        | 19<br>(9 – 29)                                                             |
| Tajikistan                                       | 2<br>(2 – 2)                                         | 5-69<br>(5-44 – 5-96)                              | 8781<br>(7148 – 10 447)                                                             | 103<br>(92 – 115)                                       | 0-15<br>(0-15 – 0-16)                             | 162<br>(130 – 192)                                                                     | 36<br>(29 – 43)                                                            |
| Turkmenistan                                     | 30<br>(26 – 35)                                      | 4-81<br>(4-6 – 5-02)                               | 9620<br>(8440 – 10 757)                                                             | 847<br>(661 – 1033)                                     | 0-2<br>(0-16 – 0-24)                              | 44<br>(16 – 66)                                                                        | 330<br>(269 – 397)                                                         |
| Uzbekistan                                       | 2<br>(2 – 2)                                         | 11-85<br>(11-37 – 12-32)                           | 212<br>(-318 – 764)                                                                 | 146<br>(132 – 161)                                      | 0-21<br>(0-2 – 0-22)                              | 353<br>(275 – 431)                                                                     | 52<br>(39 – 65)                                                            |
| Central Europe                                   | ..                                                   | 10-21<br>(9-83 – 10-6)                             | 25 786<br>(19 317 – 32 104)                                                         | ..                                                      | 0-25<br>(0-23 – 0-27)                             | 737<br>(344 – 1109)                                                                    | 1439<br>(919 – 1986)                                                       |
| Albania                                          | 13<br>(11 – 16)                                      | 6-98<br>(5-92 – 8-13)                              | 1189<br>(-163 – 2405)                                                               | 906<br>(807 – 1021)                                     | 0-12<br>(0-11 – 0-12)                             | 129<br>(110 – 147)                                                                     | 134<br>(100 – 168)                                                         |
| Bosnia and Herzegovina                           | 10<br>(8 – 11)                                       | 12-28<br>(10-83 – 14-43)                           | 0<br>(0 – 0)                                                                        | 1004<br>(823 – 1208)                                    | 0-14<br>(0-12 – 0-16)                             | 115<br>(36 – 185)                                                                      | 119<br>(32 – 220)                                                          |
| Bulgaria                                         | 26<br>(23 – 28)                                      | 7-17<br>(6-7 – 7-63)                               | 3478<br>(1720 – 5113)                                                               | 596<br>(546 – 646)                                      | 0-35<br>(0-33 – 0-37)                             | 0<br>(0 – 0)                                                                           | 89<br>(44 – 134)                                                           |
| Croatia                                          | 36<br>(33 – 40)                                      | 8-06<br>(7-74 – 8-42)                              | 965<br>(417 – 1483)                                                                 | 1434<br>(1293 – 1593)                                   | 0-23<br>(0-21 – 0-24)                             | 41<br>(18 – 64)                                                                        | 94<br>(45 – 144)                                                           |
| Czech Republic                                   | 34<br>(32 – 37)                                      | 14-1<br>(13-48 – 14-84)                            | 0<br>(0 – 0)                                                                        | 1630<br>(1368 – 1906)                                   | 0-32<br>(0-28 – 0-38)                             | 0<br>(0 – 0)                                                                           | 0<br>(0 – 0)                                                               |
| Hungary                                          | 20<br>(19 – 22)                                      | 15-6<br>(15-03 – 16-24)                            | 0<br>(0 – 0)                                                                        | 1344<br>(1230 – 1465)                                   | 0-26<br>(0-24 – 0-28)                             | 24<br>(-35 – 81)                                                                       | 33<br>(-45 – 111)                                                          |
| Macedonia                                        | 11<br>(10 – 13)                                      | 8-32<br>(7-93 – 8-72)                              | 469<br>(321 – 613)                                                                  | 730<br>(627 – 878)                                      | 0-15<br>(0-14 – 0-16)                             | 57<br>(38 – 74)                                                                        | 47<br>(30 – 65)                                                            |
| Montenegro                                       | 13<br>(12 – 15)                                      | 9-39<br>(8-79 – 9-95)                              | 20<br>(-21 – 60)                                                                    | 919<br>(838 – 1001)                                     | 0-16<br>(0-15 – 0-17)                             | 14<br>(10 – 17)                                                                        | 13<br>(9 – 17)                                                             |
| Poland                                           | 28<br>(26 – 30)                                      | 10-21<br>(9-78 – 10-63)                            | 0<br>(0 – 0)                                                                        | 1341<br>(1221 – 1467)                                   | 0-24<br>(0-22 – 0-25)                             | 77<br>(-95 – 246)                                                                      | 104<br>(-122 – 333)                                                        |
| Romania                                          | 24<br>(22 – 27)                                      | 6-11<br>(5-83 – 6-38)                              | 19 296<br>(15 002 – 23 587)                                                         | 572<br>(505 – 643)                                      | 0-29<br>(0-27 – 0-32)                             | 10<br>(-60 – 74)                                                                       | 471<br>(340 – 607)                                                         |
| Serbia                                           | 16<br>(15 – 18)                                      | 9-3<br>(8-93 – 9-65)                               | 368<br>(-307 – 987)                                                                 | 1180<br>(1063 – 1306)                                   | 0-15<br>(0-14 – 0-16)                             | 263<br>(204 – 320)                                                                     | 318<br>(239 – 408)                                                         |
| Slovakia                                         | 25<br>(23 – 28)                                      | 16-97<br>(16-28 – 17-65)                           | 0<br>(0 – 0)                                                                        | 1710<br>(1547 – 1890)                                   | 0-28<br>(0-26 – 0-29)                             | 5<br>(-6 – 15)                                                                         | 8<br>(-11 – 26)                                                            |
| Slovenia                                         | 67<br>(62 – 71)                                      | 9-87<br>(9-49 – 10-25)                             | 0<br>(0 – 0)                                                                        | 2913<br>(2668 – 3151)                                   | 0-25<br>(0-23 – 0-26)                             | 3<br>(-3 – 8)                                                                          | 8<br>(-8 – 25)                                                             |
| Eastern Europe                                   | ..                                                   | 12-12<br>(11-51 – 12-8)                            | 36 050<br>(12 837 – 57 240)                                                         | ..                                                      | 0-26<br>(0-25 – 0-27)                             | 1889<br>(666 – 3266)                                                                   | 1271<br>(462 – 2180)                                                       |
| Belarus                                          | 6<br>(6 – 7)                                         | 14-85<br>(14-32 – 15-42)                           | 0<br>(0 – 0)                                                                        | 370<br>(307 – 446)                                      | 0-29<br>(0-24 – 0-35)                             | 54<br>(-74 – 149)                                                                      | 20<br>(-28 – 59)                                                           |
| Estonia                                          | 40<br>(37 – 43)                                      | 10-29<br>(9-92 – 10-66)                            | 0<br>(0 – 0)                                                                        | 1854<br>(1697 – 2023)                                   | 0-24<br>(0-23 – 0-26)                             | 11<br>(5 – 17)                                                                         | 20<br>(9 – 31)                                                             |
| Latvia                                           | 35<br>(32 – 38)                                      | 8-75<br>(8-34 – 9-17)                              | 737<br>(485 – 985)                                                                  | 1441<br>(1310 – 1571)                                   | 0-24<br>(0-23 – 0-25)                             | 16<br>(6 – 27)                                                                         | 49<br>(27 – 72)                                                            |



|                           |                    |                          |                               |                             |                       |                           |                                |
|---------------------------|--------------------|--------------------------|-------------------------------|-----------------------------|-----------------------|---------------------------|--------------------------------|
| Lithuania                 | 27<br>(25 – 29)    | 12.3<br>(11.85 – 12.79)  | 0<br>(0 – 0)                  | 1112<br>(1008 – 1220)       | 0.33<br>(0.31 – 0.35) | 1<br>(-1 – 2)             | 1<br>(-1 – 2)                  |
| Moldova                   | 6<br>(6 – 7)       | 7.79<br>(7.48 – 8.11)    | 1723<br>(1241 – 2196)         | 313<br>(278 – 354)          | 0.2<br>(0.19 – 0.21)  | 70<br>(56 – 84)           | 33<br>(26 – 41)                |
| Russia                    | 12<br>(11 – 13)    | 13.75<br>(13.08 – 14.58) | 0<br>(0 – 0)                  | 710<br>(661 – 763)          | 0.26<br>(0.25 – 0.27) | 1237<br>(248 – 2429)      | 878<br>(172 – 1767)            |
| Ukraine                   | 5<br>(4 – 6)       | 7.02<br>(6.07 – 8.37)    | 33 590<br>(10 504 – 54 226)   | 170<br>(153 – 188)          | 0.26<br>(0.24 – 0.27) | 501<br>(143 – 896)        | 270<br>(106 – 454)             |
| High-income               | ..                 | 11.79<br>(10.78 – 12.88) | 249 199<br>(94 015 – 391 261) | ..                          | 0.2<br>(0.18 – 0.21)  | 12 493<br>(5931 – 18 151) | 235 481<br>(131 760 – 339 981) |
| Australasia               | ..                 | 11.79<br>(11.34 – 12.25) | 0<br>(0 – 0)                  | ..                          | 0.24<br>(0.22 – 0.26) | 45<br>(6 – 78)            | 307<br>(21 – 553)              |
| Australia                 | 169<br>(162 – 177) | 11.95<br>(11.49 – 12.43) | 0<br>(0 – 0)                  | 8050<br>(7310 – 8865)       | 0.24<br>(0.22 – 0.26) | 4<br>(-31 – 33)           | 34<br>(-225 – 272)             |
| New Zealand               | 135<br>(123 – 149) | 10.93<br>(10.16 – 11.63) | 0<br>(0 – 0)                  | 6628<br>(6115 – 7173)       | 0.21<br>(0.21 – 0.22) | 41<br>(28 – 55)           | 273<br>(176 – 362)             |
| High-income Asia-Pacific  | ..                 | 22.92<br>(20.6 – 24.92)  | 0<br>(0 – 0)                  | ..                          | 0.18<br>(0.16 – 0.21) | 3195<br>(626 – 5512)      | 30 556<br>(4997 – 59 443)      |
| Brunei                    | 27<br>(22 – 33)    | 15.62<br>(13.29 – 19.64) | 0<br>(0 – 0)                  | 2106<br>(1672 – 2608)       | 0.19<br>(0.15 – 0.22) | 3<br>(0 – 5)              | 6<br>(-1 – 13)                 |
| Japan                     | 68<br>(60 – 78)    | 22.42<br>(19.46 – 24.99) | 0<br>(0 – 0)                  | 9252<br>(7636 – 11 110)     | 0.16<br>(0.13 – 0.19) | 3169<br>(642 – 5453)      | 30 415<br>(4991 – 59 048)      |
| Singapore                 | 48<br>(39 – 57)    | 22.68<br>(19.12 – 27.38) | 0<br>(0 – 0)                  | 5463<br>(4493 – 6602)       | 0.18<br>(0.15 – 0.21) | 23<br>(-22 – 60)          | 135<br>(-116 – 393)            |
| South Korea               | 38<br>(36 – 40)    | 24.33<br>(23.24 – 25.44) | 0<br>(0 – 0)                  | 3662<br>(3371 – 3948)       | 0.24<br>(0.23 – 0.26) | 0<br>(0 – 0)              | 0<br>(0 – 0)                   |
| High-income North America | ..                 | 8.79<br>(7.79 – 9.87)    | 119 433<br>(27 473 – 197 248) | ..                          | 0.17<br>(0.15 – 0.18) | 5014<br>(2949 – 6919)     | 166 715<br>(92 510 – 240 972)  |
| Canada                    | 146<br>(137 – 155) | 12.99<br>(12.23 – 13.69) | 0<br>(0 – 0)                  | 9425<br>(7861 – 11 248)     | 0.19<br>(0.16 – 0.23) | 302<br>(97 – 465)         | 2882<br>(572 – 5021)           |
| Greenland                 | ..                 | 8.7<br>(7.52 – 10.28)    | 15<br>(-4 – 29)               | ..                          | 0.15<br>(0.12 – 0.18) | 1<br>(1 – 1)              | 0<br>(0 – 0)                   |
| United States             | 480<br>(415 – 548) | 8.33<br>(7.25 – 9.52)    | 119 418<br>(27 474 – 197 217) | 22 529<br>(20 547 – 24 392) | 0.17<br>(0.15 – 0.18) | 4710<br>(2677 – 6590)     | 163 833<br>(90 562 – 237 439)  |
| Southern Latin America    | ..                 | 5.92<br>(5.32 – 6.71)    | 77 103<br>(38 426 – 104 635)  | ..                          | 0.12<br>(0.1 – 0.14)  | 2402<br>(1510 – 3199)     | 12 324<br>(8276 – 16 356)      |
| Argentina                 | 49<br>(41 – 58)    | 6.1<br>(5.28 – 7.18)     | 47 282<br>(12 243 – 72 301)   | 2412<br>(2001 – 2883)       | 0.12<br>(0.1 – 0.14)  | 1529<br>(822 – 2167)      | 6164<br>(3279 – 9215)          |
| Chile                     | 77<br>(73 – 81)    | 5.48<br>(5.31 – 5.68)    | 26 005<br>(22 813 – 29 141)   | 3497<br>(3079 – 3940)       | 0.12<br>(0.11 – 0.14) | 618<br>(397 – 806)        | 4208<br>(3174 – 5250)          |
| Uruguay                   | 82<br>(70 – 97)    | 6.08<br>(5.29 – 7.06)    | 3816<br>(1301 – 5880)         | 6332<br>(5234 – 7516)       | 0.08<br>(0.07 – 0.09) | 255<br>(216 – 288)        | 1952<br>(1366 – 2520)          |
| Western Europe            | ..                 | 10.65<br>(9.86 – 11.58)  | 52 663<br>(6711 – 97 539)     | ..                          | 0.24<br>(0.22 – 0.25) | 1837<br>(233 – 3139)      | 25 579<br>(8778 – 43 286)      |
| Andorra                   | 208<br>(175 – 242) | 10.72<br>(9.35 – 12.3)   | 0<br>(0 – 0)                  | 8505<br>(6936 – 10 364)     | 0.24<br>(0.2 – 0.29)  | 0<br>(0 – 0)              | 0<br>(0 – 0)                   |
| Austria                   | 170<br>(163 – 178) | 11.15<br>(10.71 – 11.61) | 29<br>(-257 – 308)            | 4876<br>(4591 – 5155)       | 0.37<br>(0.35 – 0.39) | 0<br>(0 – 0)              | 7<br>(-52 – 63)                |
| Belgium                   | 133<br>(119 – 147) | 13.54<br>(12.39 – 15.04) | 0<br>(0 – 0)                  | 7138<br>(6627 – 7660)       | 0.24<br>(0.22 – 0.26) | 5<br>(-15 – 22)           | 39<br>(-105 – 158)             |
| Cyprus                    | 79<br>(67 – 93)    | 8.51<br>(7.29 – 9.82)    | 246<br>(-39 – 524)            | 4278<br>(3551 – 5126)       | 0.15<br>(0.13 – 0.18) | 16<br>(-1 – 31)           | 91<br>(12 – 178)               |
| Denmark                   | 292<br>(279 – 307) | 7.82<br>(7.55 – 8.09)    | 885<br>(280 – 1498)           | 9984<br>(9345 – 10 618)     | 0.22<br>(0.21 – 0.23) | 2<br>(-5 – 9)             | 273<br>(53 – 505)              |
| Finland                   | 234<br>(222 – 245) | 7.16<br>(6.84 – 7.47)    | 1777<br>(908 – 2645)          | 6763<br>(6295 – 7243)       | 0.24<br>(0.22 – 0.25) | 0<br>(-1 – 1)             | 425<br>(212 – 654)             |
| France                    | 154<br>(147 – 160) | 11.44<br>(11.01 – 11.89) | 0<br>(0 – 0)                  | 5937<br>(5456 – 6371)       | 0.28<br>(0.26 – 0.31) | 0<br>(0 – 0)              | 0<br>(0 – 0)                   |
| Germany                   | 138<br>(124 – 152) | 13.86<br>(12.63 – 15.39) | 0<br>(0 – 0)                  | 5267<br>(4933 – 5602)       | 0.34<br>(0.33 – 0.36) | 0<br>(0 – 0)              | 0<br>(0 – 0)                   |
| Greece                    | 83<br>(69 – 99)    | 6.75<br>(5.79 – 7.93)    | 7123<br>(1258 – 12 279)       | 2156<br>(1775 – 2611)       | 0.25<br>(0.21 – 0.3)  | 0<br>(0 – 0)              | 614<br>(90 – 1188)             |
| Iceland                   | 229<br>(216 – 244) | 10.14<br>(9.69 – 10.57)  | 0<br>(0 – 0)                  | 11 911<br>(11 014 – 12 818) | 0.18<br>(0.17 – 0.2)  | 2<br>(1 – 3)              | 24<br>(11 – 37)                |
| Ireland                   | 156<br>(140 – 173) | 13.09<br>(12.21 – 13.88) | 0<br>(0 – 0)                  | 9340<br>(8358 – 10 401)     | 0.21<br>(0.19 – 0.22) | 0<br>(-2 – 3)             | 4<br>(-23 – 29)                |
| Israel                    | 89<br>(76 – 103)   | 12.32<br>(10.77 – 14.4)  | 0<br>(0 – 0)                  | 4352<br>(4037 – 4682)       | 0.24<br>(0.23 – 0.26) | 0<br>(0 – 0)              | 0<br>(0 – 0)                   |
| Italy                     | 85<br>(75 – 94)    | 12.73<br>(11.46 – 14.42) | 0<br>(0 – 0)                  | 5967<br>(5439 – 6484)       | 0.17<br>(0.16 – 0.19) | 546<br>(-33 – 1077)       | 3306<br>(-104 – 6833)          |
| Luxembourg                | 272<br>(251 – 296) | 10.79<br>(10.34 – 11.26) | 0<br>(0 – 0)                  | 12 125<br>(10 974 – 13 369) | 0.22<br>(0.21 – 0.24) | 0<br>(0 – 0)              | 0<br>(-1 – 1)                  |
| Malta                     | 51<br>(44 – 59)    | 18.82<br>(16.05 – 21.55) | 0<br>(0 – 0)                  | 4902<br>(4068 – 5923)       | 0.19<br>(0.15 – 0.23) | 1<br>(-3 – 4)             | 4<br>(-14 – 20)                |
| Netherlands               | 282<br>(254 – 310) | 7.25<br>(6.67 – 7.89)    | 0<br>(0 – 0)                  | 11 153<br>(9659 – 12 740)   | 0.17<br>(0.15 – 0.2)  | 0<br>(0 – 0)              | 0<br>(0 – 0)                   |
| Norway                    | 459<br>(432 – 488) | 7.21<br>(6.92 – 7.51)    | 1275<br>(374 – 2084)          | 11 188<br>(10 435 – 12 043) | 0.27<br>(0.26 – 0.29) | 0<br>(-2 – 3)             | 601<br>(232 – 999)             |
| Portugal                  | 93<br>(85 – 103)   | 7.01<br>(6.43 – 7.52)    | 4178<br>(1393 – 7291)         | 4394<br>(4066 – 4748)       | 0.14<br>(0.14 – 0.15) | 291<br>(215 – 372)        | 1679<br>(1178 – 2219)          |
| Spain                     | 92<br>(81 – 104)   | 10.6<br>(9.45 – 11.9)    | 0<br>(0 – 0)                  | 5931<br>(5591 – 6266)       | 0.16<br>(0.15 – 0.17) | 602<br>(366 – 842)        | 3577<br>(2090 – 5177)          |

|                                     |                    |                          |                                |                             |                       |                             |                              |
|-------------------------------------|--------------------|--------------------------|--------------------------------|-----------------------------|-----------------------|-----------------------------|------------------------------|
| Sweden                              | 413<br>(351 – 478) | 5-7<br>(4-87 – 6-63)     | 11 494<br>(4594 – 17 687)      | 11 541<br>(9636 – 13 633)   | 0-19<br>(0-16 – 0-23) | 61<br>(-91 – 179)           | 5598<br>(1812 – 9541)        |
| Switzerland                         | 502<br>(465 – 539) | 7-88<br>(7-36 – 8-41)    | 2280<br>(458 – 3955)           | 15 670<br>(14 607 – 16 767) | 0-24<br>(0-22 – 0-25) | 0<br>(0 – 0)                | 1159<br>(249 – 2060)         |
| United Kingdom                      | 218<br>(189 – 250) | 7-01<br>(6-1 – 8-07)     | 23 375<br>(-7052 – 52 671)     | 8043<br>(6882 – 9264)       | 0-18<br>(0-16 – 0-21) | 311<br>(-547 – 945)         | 8178<br>(-1378 – 19 119)     |
| Latin America and Caribbean         | ..                 | 6-47<br>(5-79 – 7-22)    | 615 322<br>(410 489 – 803 049) | ..                          | 0-1<br>(0-09 – 0-11)  | 28 433<br>(23 133 – 32 514) | 81 228<br>(61 130 – 100 515) |
| Andean Latin America                | ..                 | 7-78<br>(6-65 – 9-5)     | 11 992<br>(-10962 – 30 524)    | ..                          | 0-1<br>(0-09 – 0-11)  | 2869<br>(2402 – 3267)       | 3895<br>(2850 – 4898)        |
| Bolivia                             | 11<br>(8 – 13)     | 7-42<br>(6-21 – 9-26)    | 4481<br>(-1078 – 9010)         | 693<br>(557 – 837)          | 0-1<br>(0-08 – 0-12)  | 542<br>(432 – 638)          | 430<br>(278 – 582)           |
| Ecuador                             | 30<br>(23 – 36)    | 7-86<br>(6-57 – 9-5)     | 2906<br>(-4405 – 8852)         | 1802<br>(1574 – 2057)       | 0-1<br>(0-1 – 0-11)   | 810<br>(759 – 863)          | 1556<br>(1233 – 1886)        |
| Peru                                | 18<br>(14 – 21)    | 7-86<br>(6-72 – 9-76)    | 4605<br>(-8218 – 15 468)       | 1186<br>(952 – 1437)        | 0-09<br>(0-08 – 0-11) | 1518<br>(1145 – 1831)       | 1909<br>(1184 – 2662)        |
| Caribbean                           | ..                 | 4-26<br>(3-66 – 4-9)     | 113 711<br>(93 323 – 132 567)  | ..                          | 0-1<br>(0-08 – 0-11)  | 2427<br>(1909 – 2836)       | 5893<br>(4349 – 7552)        |
| Antigua and Barbuda                 | 69<br>(57 – 84)    | 5-29<br>(4-47 – 6-18)    | 157<br>(99 – 209)              | 2862<br>(2268 – 3494)       | 0-1<br>(0-08 – 0-12)  | 4<br>(3 – 5)                | 24<br>(16 – 32)              |
| The Bahamas                         | 146<br>(119 – 177) | 6-13<br>(5-18 – 7-21)    | 423<br>(194 – 609)             | 5270<br>(4138 – 6559)       | 0-13<br>(0-11 – 0-16) | 12<br>(8 – 16)              | 129<br>(73 – 182)            |
| Barbados                            | 151<br>(125 – 181) | 3-34<br>(2-85 – 3-86)    | 887<br>(770 – 997)             | 2566<br>(2046 – 3134)       | 0-15<br>(0-13 – 0-18) | 6<br>(2 – 10)               | 151<br>(110 – 195)           |
| Belize                              | 31<br>(24 – 38)    | 3-81<br>(3-19 – 4-5)     | 996<br>(784 – 1183)            | 1329<br>(1056 – 1617)       | 0-07<br>(0-06 – 0-09) | 25<br>(20 – 28)             | 64<br>(47 – 81)              |
| Bermuda                             | ..                 | 5-96<br>(5-06 – 6-97)    | 88<br>(49 – 124)               | ..                          | 0-13<br>(0-11 – 0-15) | 2<br>(1 – 3)                | 0<br>(0 – 0)                 |
| Cuba                                | 44<br>(35 – 54)    | 4-29<br>(3-65 – 4-91)    | 27 201<br>(21 141 – 33 629)    | 1342<br>(1039 – 1730)       | 0-11<br>(0-09 – 0-13) | 527<br>(327 – 704)          | 1920<br>(1269 – 2695)        |
| Dominica                            | 23<br>(19 – 28)    | 7-58<br>(6-41 – 8-85)    | 54<br>(22 – 86)                | 1365<br>(1088 – 1676)       | 0-1<br>(0-09 – 0-12)  | 4<br>(3 – 5)                | 6<br>(4 – 9)                 |
| Dominican Republic                  | 40<br>(33 – 48)    | 4-5<br>(3-84 – 5-26)     | 24 490<br>(18 527 – 29 940)    | 1185<br>(934 – 1442)        | 0-12<br>(0-1 – 0-14)  | 388<br>(255 – 494)          | 1454<br>(982 – 1967)         |
| Grenada                             | 45<br>(37 – 55)    | 4-55<br>(3-88 – 5-35)    | 248<br>(185 – 303)             | 1646<br>(1316 – 1998)       | 0-1<br>(0-08 – 0-12)  | 6<br>(4 – 7)                | 21<br>(15 – 28)              |
| Guyana                              | 11<br>(9 – 14)     | 6-09<br>(5-08 – 7-13)    | 1012<br>(517 – 1479)           | 1007<br>(779 – 1274)        | 0-06<br>(0-05 – 0-07) | 62<br>(55 – 68)             | 74<br>(52 – 99)              |
| Haiti                               | 5<br>(4 – 6)       | 2-95<br>(2-46 – 3-44)    | 40 783<br>(35 773 – 45 780)    | 205<br>(164 – 249)          | 0-07<br>(0-06 – 0-08) | 882<br>(747 – 981)          | 390<br>(299 – 485)           |
| Jamaica                             | 38<br>(31 – 46)    | 2-75<br>(2-34 – 3-18)    | 10 051<br>(9014 – 11 074)      | 2218<br>(1768 – 2717)       | 0-04<br>(0-03 – 0-05) | 281<br>(261 – 300)          | 1014<br>(821 – 1223)         |
| Puerto Rico                         | ..                 | 8-71<br>(7-46 – 10-12)   | 1528<br>(-178 – 2836)          | ..                          | 0-12<br>(0-1 – 0-14)  | 153<br>(96 – 202)           | 0<br>(0 – 0)                 |
| Saint Lucia                         | 36<br>(30 – 44)    | 5-98<br>(5-08 – 6-96)    | 265<br>(153 – 368)             | 1763<br>(1396 – 2166)       | 0-1<br>(0-08 – 0-12)  | 9<br>(7 – 12)               | 27<br>(18 – 36)              |
| Saint Vincent and the<br>Grenadines | 30<br>(25 – 36)    | 4-24<br>(3-62 – 4-96)    | 275<br>(212 – 329)             | 1096<br>(886 – 1345)        | 0-09<br>(0-08 – 0-11) | 6<br>(5 – 8)                | 15<br>(11 – 20)              |
| Suriname                            | 29<br>(24 – 35)    | 4-49<br>(3-81 – 5-21)    | 1226<br>(918 – 1518)           | 1080<br>(853 – 1343)        | 0-09<br>(0-08 – 0-11) | 29<br>(20 – 35)             | 67<br>(46 – 89)              |
| Trinidad and Tobago                 | 121<br>(99 – 145)  | 3-73<br>(3-18 – 4-36)    | 3899<br>(3215 – 4531)          | 2295<br>(1810 – 2801)       | 0-15<br>(0-12 – 0-18) | 27<br>(10 – 40)             | 537<br>(377 – 714)           |
| Virgin Islands U-S-                 | ..                 | 5-98<br>(5-03 – 7-05)    | 127<br>(60 – 184)              | ..                          | 0-14<br>(0-11 – 0-16) | 4<br>(2 – 6)                | 0<br>(0 – 0)                 |
| Central Latin America               | ..                 | 5-94<br>(5-09 – 6-85)    | 380 121<br>(252 615 – 495 549) | ..                          | 0-08<br>(0-07 – 0-09) | 16 581<br>(14 173 – 18 455) | 50 882<br>(39 397 – 62 178)  |
| Colombia                            | 17<br>(14 – 21)    | 8-86<br>(7-54 – 10-35)   | 6139<br>(-14333 – 25 382)      | 2423<br>(2089 – 2742)       | 0-05<br>(0-05 – 0-05) | 4122<br>(3892 – 4313)       | 10 120<br>(8387 – 11 632)    |
| Costa Rica                          | 92<br>(75 – 112)   | 4-38<br>(3-71 – 5-15)    | 11 198<br>(8563 – 13 699)      | 4260<br>(3380 – 5187)       | 0-07<br>(0-06 – 0-09) | 316<br>(258 – 359)          | 2400<br>(1755 – 3076)        |
| El Salvador                         | 43<br>(37 – 48)    | 2-61<br>(2-38 – 2-82)    | 24 501<br>(23 066 – 25 961)    | 3353<br>(2824 – 3971)       | 0-03<br>(0-02 – 0-03) | 672<br>(646 – 698)          | 3299<br>(2830 – 3794)        |
| Guatemala                           | 17<br>(13 – 20)    | 5-98<br>(4-97 – 7-24)    | 18 928<br>(2626 – 31 078)      | 1159<br>(923 – 1410)        | 0-07<br>(0-06 – 0-08) | 1141<br>(944 – 1303)        | 1658<br>(1132 – 2233)        |
| Honduras                            | 12<br>(10 – 15)    | 5-59<br>(4-63 – 6-59)    | 13 067<br>(6947 – 18 450)      | 805<br>(622 – 1012)         | 0-07<br>(0-06 – 0-09) | 567<br>(456 – 657)          | 625<br>(411 – 841)           |
| Mexico                              | 43<br>(36 – 51)    | 4-99<br>(4-29 – 5-77)    | 236 409<br>(160 140 – 305 056) | 2059<br>(1618 – 2512)       | 0-08<br>(0-07 – 0-1)  | 7645<br>(5842 – 8954)       | 26 228<br>(18 374 – 34 244)  |
| Nicaragua                           | 7<br>(6 – 9)       | 8-49<br>(7-13 – 9-97)    | 612<br>(-2376 – 2991)          | 695<br>(551 – 854)          | 0-07<br>(0-06 – 0-09) | 410<br>(336 – 468)          | 292<br>(189 – 396)           |
| Panama                              | 32<br>(26 – 38)    | 13-79<br>(11-76 – 15-98) | 0<br>(0 – 0)                   | 2418<br>(1960 – 2968)       | 0-14<br>(0-12 – 0-16) | 72<br>(18 – 112)            | 178<br>(43 – 329)            |
| Venezuela                           | 46<br>(37 – 57)    | 4-8<br>(4-01 – 5-65)     | 69 267<br>(52 395 – 84 376)    | 1725<br>(1374 – 2122)       | 0-1<br>(0-08 – 0-12)  | 1637<br>(1408 – 1841)       | 6083<br>(4487 – 7889)        |
| Tropical Latin America              | ..                 | 7-27<br>(6-79 – 7-79)    | 109 498<br>(63 846 – 156 000)  | ..                          | 0-12<br>(0-11 – 0-14) | 6556<br>(4321 – 8378)       | 20 558<br>(13 107 – 27 845)  |
| Brazil                              | 51<br>(45 – 56)    | 7-33<br>(6-85 – 7-85)    | 98 890<br>(56 314 – 140 448)   | 2367<br>(1985 – 2777)       | 0-12<br>(0-11 – 0-14) | 6167<br>(3989 – 7942)       | 19 796<br>(12 529 – 26 906)  |
| Paraguay                            | 24<br>(20 – 30)    | 5-51<br>(4-68 – 6-51)    | 10 607<br>(5839 – 14 711)      | 1271<br>(1010 – 1559)       | 0-09<br>(0-07 – 0-1)  | 389<br>(304 – 455)          | 762<br>(519 – 1013)          |
| North Africa and Middle East        | ..                 | 7-13<br>(6-31 – 8-23)    | 676 422<br>(469 769 – 838 873) | ..                          | 0-12<br>(0-11 – 0-14) | 23 918<br>(17 677 – 28 552) | 40 399<br>(26 699 – 53 437)  |

|                                      |               |                        |                                    |                         |                     |                              |                              |
|--------------------------------------|---------------|------------------------|------------------------------------|-------------------------|---------------------|------------------------------|------------------------------|
| Afghanistan                          | 2<br>(1-2)    | 5-61<br>(4-67-6-9)     | 63 000<br>(28 873-87 927)          | 172<br>(130-219)        | 0-08<br>(0-07-0-1)  | 2490<br>(1879-2993)          | 551<br>(350-765)             |
| Algeria                              | 19<br>(16-23) | 5-61<br>(4-74-6-66)    | 47 746<br>(26 082-66 884)          | 1034<br>(781-1306)      | 0-12<br>(0-1-0-16)  | 1108<br>(502-1609)           | 2121<br>(1100-3193)          |
| Bahrain                              | 52<br>(40-64) | 10-69<br>(8-81-13-26)  | 9<br>(-11-27)                      | 10 273<br>(7851-12 821) | 0-06<br>(0-05-0-07) | 87<br>(72-98)                | 905<br>(567-1223)            |
| Egypt                                | 3<br>(2-4)    | 9-29<br>(7-89-11-49)   | 1275<br>(-4466-6068)               | 186<br>(146-228)        | 0-18<br>(0-15-0-21) | 1492<br>(553-2250)           | 288<br>(91-488)              |
| Iran                                 | 17<br>(14-21) | 7-23<br>(6-21-8-57)    | 21 686<br>(-20514-53 980)          | 1873<br>(1445-2348)     | 0-08<br>(0-07-0-1)  | 4995<br>(3755-5906)          | 9876<br>(5825-14 039)        |
| Iraq                                 | 24<br>(19-31) | 2-33<br>(1-94-2-77)    | 159 645<br>(142 270-174 339)       | 782<br>(576-1036)       | 0-09<br>(0-07-0-11) | 2264<br>(1420-2905)          | 5719<br>(4092-7440)          |
| Jordan                               | 24<br>(19-30) | 4-73<br>(3-97-5-69)    | 15 825<br>(9757-20 581)            | 552<br>(427-698)        | 0-25<br>(0-2-0-3)   | 28<br>(11-43)                | 403<br>(206-611)             |
| Kuwait                               | 65<br>(51-80) | 8-64<br>(7-24-10-59)   | 217<br>(-427-747)                  | 4681<br>(3469-6108)     | 0-13<br>(0-1-0-16)  | 69<br>(22-108)               | 353<br>(89-658)              |
| Lebanon                              | 49<br>(38-60) | 5-16<br>(4-34-6-15)    | 12 180<br>(7591-15 958)            | 2934<br>(2306-3618)     | 0-1<br>(0-08-0-12)  | 315<br>(228-388)             | 1539<br>(1023-2061)          |
| Libya                                | 14<br>(11-18) | 7-93<br>(6-81-9-44)    | 1932<br>(-1693-4475)               | 999<br>(738-1308)       | 0-13<br>(0-11-0-16) | 158<br>(64-240)              | 194<br>(63-341)              |
| Morocco                              | 12<br>(10-15) | 4-78<br>(3-97-5-83)    | 77 838<br>(52 509-97 910)          | 1344<br>(1044-1683)     | 0-05<br>(0-04-0-07) | 2867<br>(2547-3136)          | 4854<br>(3602-6239)          |
| Oman                                 | 34<br>(26-42) | 9-14<br>(7-59-11-27)   | 19<br>(-75-104)                    | 5974<br>(4508-7561)     | 0-06<br>(0-05-0-07) | 300<br>(250-339)             | 1806<br>(1136-2537)          |
| Palestine                            | 8<br>(7-10)   | 5-21<br>(4-37-6-19)    | 4803<br>(896-8395)                 | 662<br>(492-885)        | 0-08<br>(0-07-0-11) | 278<br>(170-361)             | 230<br>(113-359)             |
| Qatar                                | 64<br>(48-81) | 14-61<br>(11-97-17-89) | 0<br>(0-0)                         | 7533<br>(5354-10 209)   | 0-13<br>(0-1-0-17)  | 29<br>(5-47)                 | 232<br>(38-449)              |
| Saudi Arabia                         | 54<br>(44-65) | 10-55<br>(9-09-12-28)  | 637<br>(-1938-3394)                | 5260<br>(4124-6563)     | 0-12<br>(0-1-0-14)  | 802<br>(437-1111)            | 4345<br>(1948-6963)          |
| Sudan                                | 7<br>(6-9)    | 5-5<br>(4-62-6-7)      | 73 204<br>(34 725-101 941)         | 580<br>(429-762)        | 0-09<br>(0-07-0-11) | 2331<br>(1590-2886)          | 1918<br>(1135-2772)          |
| Syria                                | 1<br>(1-1)    | 5-06<br>(4-27-6-03)    | 61 729<br>(46 076-74 829)          | 38<br>(29-48)           | 0-13<br>(0-1-0-15)  | 846<br>(486-1160)            | 79<br>(50-110)               |
| Tunisia                              | 12<br>(9-14)  | 7-28<br>(6-22-8-71)    | 3098<br>(-1641-7151)               | 985<br>(773-1223)       | 0-1<br>(0-09-0-12)  | 516<br>(360-649)             | 556<br>(327-828)             |
| Turkey                               | 13<br>(11-15) | 12-18<br>(11-65-12-72) | 0<br>(0-0)                         | 819<br>(704-940)        | 0-22<br>(0-21-0-23) | 358<br>(213-499)             | 295<br>(166-428)             |
| United Arab Emirates                 | 78<br>(59-99) | 8-49<br>(6-81-10-95)   | 402<br>(-827-1492)                 | 7529<br>(5702-9516)     | 0-09<br>(0-08-0-12) | 272<br>(124-384)             | 2145<br>(773-3653)           |
| Yemen                                | 8<br>(7-11)   | 2-5<br>(2-22-2-81)     | 131 176<br>(121 549-140 001)       | 382<br>(272-518)        | 0-07<br>(0-06-0-09) | 2312<br>(1786-2718)          | 1992<br>(1504-2638)          |
| South Asia                           | ..            | 4-67<br>(3-93-5-48)    | 4 027 525<br>(3 113 082-4 896 398) | ..                      | 0-07<br>(0-06-0-08) | 120 653<br>(108 685-130 918) | 38 906<br>(30 448-47 561)    |
| Bangladesh                           | 2<br>(1-2)    | 4-39<br>(3-69-5-18)    | 422 808<br>(323 953-514 241)       | 119<br>(93-148)         | 0-07<br>(0-06-0-08) | 12 253<br>(10 232-13 694)    | 2218<br>(1610-2822)          |
| Bhutan                               | 4<br>(4-5)    | 5-91<br>(5-0-6-92)     | 1100<br>(605-1507)                 | 265<br>(208-336)        | 0-1<br>(0-08-0-12)  | 36<br>(24-45)                | 15<br>(9-20)                 |
| India                                | 4<br>(3-5)    | 4-59<br>(3-82-5-4)     | 3 217 963<br>(2 493 450-3 913 540) | 230<br>(192-275)        | 0-07<br>(0-07-0-08) | 92 448<br>(84 033-100 097)   | 33 460<br>(26 322-41 004)    |
| Nepal                                | 4<br>(3-5)    | 2-65<br>(2-24-3-07)    | 113 559<br>(102 332-124 285)       | 152<br>(120-192)        | 0-07<br>(0-06-0-08) | 2207<br>(1843-2507)          | 769<br>(601-958)             |
| Pakistan                             | 2<br>(1-2)    | 5-76<br>(4-89-6-74)    | 272 095<br>(150 396-379 250)       | 144<br>(109-182)        | 0-07<br>(0-06-0-08) | 13 709<br>(11 176-15 491)    | 2444<br>(1690-3248)          |
| Southeast Asia East Asia and Oceania | ..            | 6-69<br>(6-11-7-29)    | 1 709 453<br>(1 060 336-2 339 121) | ..                      | 0-14<br>(0-13-0-15) | 71 154<br>(62 987-78 765)    | 130 584<br>(102 424-160 421) |
| East Asia                            | ..            | 7-1<br>(6-6-7-59)      | 753 139<br>(400 129-1 114 796)     | ..                      | 0-18<br>(0-17-0-2)  | 12 175<br>(6354-17 677)      | 33 462<br>(20 311-47 564)    |
| China                                | 30<br>(28-33) | 6-73<br>(6-28-7-17)    | 751 600<br>(401 537-1 113 190)     | 822<br>(739-914)        | 0-18<br>(0-17-0-2)  | 11 360<br>(5698-16 459)      | 32 656<br>(19 837-46 420)    |
| North Korea                          | 5<br>(4-6)    | 7-98<br>(6-79-9-38)    | 1539<br>(-7288-7371)               | 246<br>(199-299)        | 0-14<br>(0-12-0-16) | 579<br>(159-927)             | 156<br>(32-286)              |
| Taiwan                               | 20<br>(17-25) | 31-05<br>(26-72-36-07) | 0<br>(0-0)                         | 2642<br>(2078-3277)     | 0-17<br>(0-14-0-2)  | 236<br>(-13-443)             | 649<br>(-8-1382)             |
| Oceania                              | ..            | 6-17<br>(5-19-7-76)    | 13 061<br>(2801-19 123)            | ..                      | 0-07<br>(0-06-0-09) | 752<br>(620-860)             | 411<br>(279-534)             |
| American Samoa                       | ..            | 9-87<br>(8-28-11-83)   | 2<br>(-2-6)                        | ..                      | 0-09<br>(0-08-0-11) | 4<br>(3-5)                   | 0<br>(0-0)                   |
| Federated States of Micronesia       | 14<br>(12-17) | 8-2<br>(6-88-9-65)     | 40<br>(-18-102)                    | 1042<br>(837-1253)      | 0-09<br>(0-07-0-11) | 6<br>(5-7)                   | 7<br>(4-10)                  |
| Fiji                                 | 10<br>(8-13)  | 8-78<br>(7-32-10-99)   | 233<br>(-83-516)                   | 835<br>(671-996)        | 0-08<br>(0-07-0-1)  | 58<br>(47-67)                | 52<br>(33-70)                |
| Guam                                 | ..            | 10-14<br>(8-73-11-96)  | 3<br>(-8-12)                       | ..                      | 0-1<br>(0-08-0-12)  | 8<br>(6-11)                  | 0<br>(0-0)                   |
| Kiribati                             | 9<br>(7-12)   | 6-55<br>(5-43-7-82)    | 88<br>(11-160)                     | 697<br>(544-871)        | 0-07<br>(0-06-0-09) | 8<br>(6-9)                   | 6<br>(4-9)                   |
| Marshall Islands                     | 33<br>(26-40) | 7-12<br>(5-89-8-91)    | 41<br>(-9-81)                      | 2449<br>(1980-2948)     | 0-07<br>(0-06-0-09) | 5<br>(4-6)                   | 13<br>(9-18)                 |
| Northern Mariana Islands             | ..            | 9-87<br>(8-18-12-47)   | 0<br>(-1-1)                        | ..                      | 0-09<br>(0-07-0-11) | 6<br>(4-7)                   | 0<br>(0-0)                   |
| Papua New Guinea                     | 5<br>(4-7)    | 5-68<br>(4-77-7-26)    | 11 686<br>(2535-16 966)            | 346<br>(282-421)        | 0-07<br>(0-06-0-09) | 576<br>(474-664)             | 267<br>(177-357)             |

|                                  |                   |                         |                                      |                           |                       |                             |                              |
|----------------------------------|-------------------|-------------------------|--------------------------------------|---------------------------|-----------------------|-----------------------------|------------------------------|
| Samoa                            | 14<br>(11 – 17)   | 7.61<br>(6.31 – 9.23)   | 50<br>(-36 – 134)                    | 998<br>(799 – 1205)       | 0.08<br>(0.07 – 0.1)  | 12<br>(9 – 14)              | 13<br>(8 – 18)               |
| Solomon Islands                  | 8<br>(7 – 10)     | 6.18<br>(5.07 – 7.34)   | 652<br>(261 – 1022)                  | 629<br>(496 – 769)        | 0.07<br>(0.06 – 0.08) | 45<br>(38 – 51)             | 34<br>(23 – 45)              |
| Tonga                            | 10<br>(8 – 13)    | 8.09<br>(6.86 – 9.81)   | 22<br>(-32 – 63)                     | 748<br>(614 – 891)        | 0.09<br>(0.07 – 0.1)  | 6<br>(5 – 7)                | 5<br>(3 – 7)                 |
| Vanuatu                          | 10<br>(7 – 12)    | 6.37<br>(5.33 – 7.83)   | 244<br>(-5 – 403)                    | 642<br>(497 – 809)        | 0.08<br>(0.06 – 0.09) | 18<br>(14 – 21)             | 14<br>(9 – 20)               |
| Southeast Asia                   | ..                | 5.73<br>(4.82 – 6.78)   | 943 254<br>(591 879 – 1 254 765)     | ..                        | 0.04<br>(0.03 – 0.05) | 58 227<br>(54 094 – 61 475) | 96 711<br>(75 355 – 119 452) |
| Cambodia                         | 6<br>(5 – 7)      | 5.1<br>(4.55 – 5.76)    | 27 443<br>(19 330 – 34 554)          | 990<br>(788 – 1208)       | 0.03<br>(0.02 – 0.03) | 1640<br>(1554 – 1723)       | 1802<br>(1418 – 2257)        |
| Indonesia                        | 12<br>(9 – 14)    | 5.83<br>(4.7 – 7.24)    | 295 299<br>(93 244 – 446 300)        | 1213<br>(921 – 1533)      | 0.04<br>(0.03 – 0.05) | 20 694<br>(18 605 – 22 305) | 28 794<br>(20 757 – 38 324)  |
| Laos                             | 6<br>(5 – 7)      | 4.48<br>(3.74 – 5.3)    | 12 330<br>(7785 – 16 551)            | 829<br>(660 – 1023)       | 0.02<br>(0.02 – 0.03) | 728<br>(689 – 768)          | 677<br>(530 – 850)           |
| Malaysia                         | 18<br>(15 – 21)   | 12.69<br>(10.7 – 14.84) | 0<br>(0 – 0)                         | 3757<br>(3048 – 4552)     | 0.04<br>(0.04 – 0.05) | 2447<br>(2230 – 2638)       | 9236<br>(6904 – 11 901)      |
| Maldives                         | 109<br>(85 – 135) | 6.01<br>(5.04 – 7.11)   | 459<br>(192 – 687)                   | 12 829<br>(9972 – 15 884) | 0.04<br>(0.03 – 0.04) | 33<br>(31 – 35)             | 474<br>(349 – 609)           |
| Mauritius                        | 39<br>(32 – 47)   | 6.78<br>(5.73 – 7.96)   | 851<br>(-14 – 1571)                  | 4529<br>(3651 – 5557)     | 0.04<br>(0.03 – 0.05) | 121<br>(111 – 129)          | 582<br>(434 – 752)           |
| Myanmar                          | 5<br>(4 – 6)      | 5.73<br>(4.82 – 6.77)   | 69 602<br>(33 044 – 101 798)         | 821<br>(653 – 1028)       | 0.03<br>(0.02 – 0.03) | 5260<br>(4990 – 5521)       | 4699<br>(3602 – 6028)        |
| Philippines                      | 9<br>(7 – 10)     | 6.94<br>(5.83 – 8.1)    | 61 728<br>(-3412 – 114 239)          | 1697<br>(1371 – 2060)     | 0.03<br>(0.02 – 0.03) | 10 025<br>(9471 – 10 537)   | 17 573<br>(13 537 – 22 100)  |
| Sri Lanka                        | 9<br>(7 – 10)     | 6.38<br>(5.41 – 7.46)   | 19 598<br>(7286 – 30 838)            | 1004<br>(810 – 1221)      | 0.04<br>(0.03 – 0.05) | 1979<br>(1825 – 2115)       | 2166<br>(1633 – 2746)        |
| Seychelles                       | 53<br>(43 – 64)   | 5.22<br>(4.5 – 5.95)    | 141<br>(84 – 196)                    | 4837<br>(3727 – 5966)     | 0.04<br>(0.03 – 0.05) | 9<br>(8 – 10)               | 51<br>(38 – 65)              |
| Thailand                         | 30<br>(25 – 36)   | 3.7<br>(3.13 – 4.29)    | 194 354<br>(161 103 – 226 590)       | 1850<br>(1463 – 2264)     | 0.04<br>(0.04 – 0.05) | 6255<br>(5714 – 6751)       | 17 576<br>(13 678 – 21 881)  |
| Timor-Leste                      | 4<br>(3 – 5)      | 6.53<br>(5.49 – 7.85)   | 946<br>(44 – 1620)                   | 590<br>(458 – 746)        | 0.03<br>(0.03 – 0.04) | 111<br>(103 – 118)          | 69<br>(52 – 91)              |
| Vietnam                          | 14<br>(12 – 17)   | 3.77<br>(3.17 – 4.38)   | 260 504<br>(214 653 – 306 356)       | 1032<br>(834 – 1254)      | 0.04<br>(0.03 – 0.05) | 8926<br>(8260 – 9545)       | 13 011<br>(10 316 – 15 939)  |
| Sub-Saharan Africa               | ..                | 3.77<br>(3.22 – 4.42)   | 3 020 640<br>(2 414 437 – 3 539 543) | ..                        | 0.06<br>(0.05 – 0.07) | 87 442<br>(76 512 – 95 734) | 44 436<br>(34 158 – 54 100)  |
| Central sub-Saharan Africa       | ..                | 3.5<br>(2.92 – 4.23)    | 393 978<br>(301 686 – 465 275)       | ..                        | 0.07<br>(0.06 – 0.09) | 9590<br>(7859 – 11 045)     | 2542<br>(1802 – 3288)        |
| Angola                           | 9<br>(7 – 11)     | 4.07<br>(3.36 – 4.76)   | 63 953<br>(46 328 – 81 532)          | 369<br>(286 – 467)        | 0.08<br>(0.06 – 0.09) | 1717<br>(1302 – 2081)       | 1232<br>(843 – 1675)         |
| Central African Republic         | 1<br>(1 – 1)      | 2.87<br>(2.36 – 3.66)   | 25 402<br>(20 393 – 28 715)          | 47<br>(37 – 57)           | 0.06<br>(0.05 – 0.07) | 589<br>(507 – 653)          | 56<br>(42 – 70)              |
| Congo (Brazzaville)              | 4<br>(3 – 5)      | 4.88<br>(4.12 – 5.96)   | 10 362<br>(6201 – 13 219)            | 180<br>(142 – 222)        | 0.09<br>(0.08 – 0.11) | 282<br>(203 – 349)          | 97<br>(63 – 129)             |
| Democratic Republic of the Congo | 2<br>(1 – 2)      | 3.26<br>(2.68 – 4.0)    | 290 433<br>(227 403 – 340 120)       | 69<br>(54 – 85)           | 0.07<br>(0.06 – 0.08) | 6881<br>(5634 – 7924)       | 959<br>(696 – 1220)          |
| Equatorial Guinea                | 32<br>(25 – 41)   | 5.67<br>(4.75 – 6.85)   | 1471<br>(691 – 2070)                 | 1367<br>(1030 – 1733)     | 0.1<br>(0.08 – 0.11)  | 47<br>(34 – 59)             | 114<br>(70 – 162)            |
| Gabon                            | 16<br>(12 – 19)   | 5.75<br>(4.79 – 7.02)   | 2358<br>(798 – 3489)                 | 614<br>(492 – 751)        | 0.11<br>(0.09 – 0.13) | 75<br>(43 – 100)            | 85<br>(46 – 124)             |
| Eastern sub-Saharan Africa       | ..                | 4.28<br>(3.67 – 5.01)   | 996 828<br>(743 228 – 1 207 013)     | ..                        | 0.05<br>(0.05 – 0.06) | 36 696<br>(33 170 – 39 410) | 11 333<br>(8868 – 13 671)    |
| Burundi                          | 1<br>(1 – 1)      | 5.98<br>(5.02 – 7.3)    | 11 871<br>(3913 – 18 542)            | 94<br>(75 – 116)          | 0.05<br>(0.04 – 0.06) | 1158<br>(1015 – 1274)       | 121<br>(86 – 157)            |
| Comoros                          | 4<br>(3 – 5)      | 5.91<br>(4.89 – 7.38)   | 955<br>(243 – 1488)                  | 130<br>(101 – 161)        | 0.15<br>(0.12 – 0.18) | 15<br>(4 – 23)              | 6<br>(2 – 9)                 |
| Djibouti                         | 6<br>(4 – 7)      | 4.89<br>(4.06 – 6.02)   | 1304<br>(408 – 1940)                 | 343<br>(273 – 414)        | 0.06<br>(0.05 – 0.08) | 70<br>(57 – 79)             | 31<br>(21 – 42)              |
| Eritrea                          | 1<br>(1 – 2)      | 5.08<br>(4.22 – 6.0)    | 9630<br>(5819 – 13 329)              | 98<br>(76 – 125)          | 0.06<br>(0.05 – 0.08) | 408<br>(344 – 462)          | 55<br>(37 – 73)              |
| Ethiopia                         | 2<br>(2 – 3)      | 3.94<br>(3.28 – 4.61)   | 273 222<br>(206 661 – 334 516)       | 246<br>(194 – 311)        | 0.03<br>(0.03 – 0.04) | 10 888<br>(10 182 – 11 519) | 3339<br>(2525 – 4242)        |
| Kenya                            | 6<br>(5 – 7)      | 4.98<br>(4.24 – 5.94)   | 98 404<br>(62 012 – 127 388)         | 467<br>(378 – 556)        | 0.05<br>(0.04 – 0.06) | 4086<br>(3634 – 4445)       | 2520<br>(1873 – 3132)        |
| Madagascar                       | 1<br>(1 – 2)      | 4.19<br>(3.44 – 5.3)    | 60 315<br>(32 355 – 79 371)          | 103<br>(82 – 130)         | 0.05<br>(0.04 – 0.06) | 2491<br>(2225 – 2719)       | 343<br>(246 – 447)           |
| Malawi                           | 3<br>(2 – 3)      | 2.91<br>(2.39 – 3.48)   | 80 086<br>(68 235 – 90 326)          | 145<br>(118 – 171)        | 0.05<br>(0.04 – 0.06) | 2061<br>(1859 – 2214)       | 523<br>(414 – 631)           |
| Mozambique                       | 2<br>(1 – 2)      | 3.53<br>(2.93 – 4.27)   | 111 554<br>(86 778 – 131 250)        | 118<br>(94 – 144)         | 0.04<br>(0.04 – 0.05) | 3467<br>(3119 – 3768)       | 608<br>(465 – 751)           |
| Rwanda                           | 3<br>(2 – 3)      | 6.41<br>(5.86 – 7.0)    | 9032<br>(3988 – 13 555)              | 494<br>(395 – 613)        | 0.03<br>(0.02 – 0.04) | 1267<br>(1188 – 1341)       | 653<br>(495 – 839)           |
| Somalia                          | 1<br>(1 – 2)      | 4.21<br>(3.49 – 5.13)   | 31 363<br>(22 963 – 38 164)          | 105<br>(81 – 129)         | 0.05<br>(0.04 – 0.07) | 1007<br>(886 – 1104)        | 153<br>(114 – 194)           |
| South Sudan                      | 1<br>(1 – 1)      | 2.81<br>(2.34 – 3.47)   | 53 687<br>(42 287 – 62 028)          | 37<br>(29 – 45)           | 0.04<br>(0.04 – 0.06) | 1594<br>(1410 – 1743)       | 98<br>(74 – 121)             |
| Tanzania                         | 3<br>(2 – 3)      | 5.46<br>(4.54 – 6.56)   | 82 667<br>(28 247 – 127 002)         | 125<br>(99 – 155)         | 0.1<br>(0.08 – 0.12)  | 2717<br>(1706 – 3547)       | 587<br>(308 – 849)           |
| Uganda                           | 3<br>(3 – 4)      | 4.17<br>(3.85 – 4.51)   | 104 655<br>(89 660 – 119 680)        | 232<br>(196 – 270)        | 0.05<br>(0.04 – 0.06) | 4041<br>(3717 – 4317)       | 1282<br>(1057 – 1518)        |

|                             |                 |                       |                                      |                       |                       |                             |                             |
|-----------------------------|-----------------|-----------------------|--------------------------------------|-----------------------|-----------------------|-----------------------------|-----------------------------|
| Zambia                      | 8<br>(7 – 10)   | 2.97<br>(2.42 – 3.68) | 68 083<br>(55 857 – 77 098)          | 299<br>(238 – 364)    | 0.07<br>(0.06 – 0.08) | 1426<br>(1181 – 1625)       | 1013<br>(756 – 1278)        |
| Southern sub-Saharan Africa | ..              | 3.32<br>(2.82 – 3.9)  | 315 824<br>(272 681 – 351 952)       | ..                    | 0.13<br>(0.1 – 0.16)  | 3230<br>(1217 – 4639)       | 14 780<br>(10 718 – 19 024) |
| Botswana                    | 45<br>(36 – 55) | 3.92<br>(3.27 – 4.69) | 6989<br>(5418 – 8325)                | 1552<br>(1203 – 1925) | 0.09<br>(0.07 – 0.1)  | 144<br>(109 – 174)          | 545<br>(381 – 712)          |
| Lesotho                     | 10<br>(8 – 12)  | 2.42<br>(2.0 – 2.92)  | 14 410<br>(13 144 – 15 473)          | 348<br>(280 – 427)    | 0.06<br>(0.05 – 0.07) | 287<br>(255 – 315)          | 244<br>(194 – 297)          |
| Namibia                     | 51<br>(41 – 61) | 3.57<br>(3.01 – 4.26) | 8217<br>(6723 – 9470)                | 1331<br>(1061 – 1638) | 0.1<br>(0.09 – 0.13)  | 120<br>(79 – 155)           | 584<br>(406 – 764)          |
| South Africa                | 50<br>(41 – 59) | 3.53<br>(2.99 – 4.17) | 212 016<br>(181 378 – 239 044)       | 871<br>(634 – 1148)   | 0.15<br>(0.12 – 0.2)  | 1078<br>(-660 – 2294)       | 11 610<br>(8105 – 15 309)   |
| Swaziland (eSwatini)        | 29<br>(23 – 35) | 2.93<br>(2.43 – 3.53) | 6271<br>(5439 – 6994)                | 1840<br>(1441 – 2325) | 0.04<br>(0.03 – 0.04) | 171<br>(159 – 181)          | 496<br>(390 – 619)          |
| Zimbabwe                    | 11<br>(9 – 13)  | 2.73<br>(2.28 – 3.31) | 67 921<br>(59 244 – 75 421)          | 396<br>(314 – 489)    | 0.06<br>(0.05 – 0.08) | 1431<br>(1214 – 1613)       | 1301<br>(987 – 1598)        |
| Western sub-Saharan Africa  | ..              | 3.49<br>(2.96 – 4.14) | 1 314 010<br>(1 052 581 – 1 531 034) | ..                    | 0.06<br>(0.05 – 0.07) | 37 925<br>(33 376 – 41 367) | 15 781<br>(12 131 – 19 252) |
| Benin                       | 2<br>(2 – 3)    | 3.71<br>(3.13 – 4.39) | 32 265<br>(24 674 – 38 953)          | 145<br>(116 – 174)    | 0.05<br>(0.04 – 0.06) | 1073<br>(949 – 1179)        | 234<br>(176 – 290)          |
| Burkina Faso                | 5<br>(4 – 6)    | 1.6<br>(1.32 – 1.89)  | 107 078<br>(99 758 – 113 840)        | 141<br>(113 – 173)    | 0.05<br>(0.04 – 0.06) | 2156<br>(1938 – 2353)       | 831<br>(680 – 993)          |
| Cameroon                    | 4<br>(3 – 5)    | 4.07<br>(3.32 – 5.14) | 67 795<br>(42 948 – 85 051)          | 232<br>(186 – 280)    | 0.06<br>(0.05 – 0.07) | 2145<br>(1835 – 2406)       | 800<br>(573 – 1027)         |
| Cape Verde                  | 11<br>(9 – 13)  | 6.16<br>(5.2 – 7.44)  | 465<br>(23 – 813)                    | 624<br>(499 – 751)    | 0.09<br>(0.07 – 0.1)  | 32<br>(23 – 38)             | 25<br>(15 – 35)             |
| Chad                        | 3<br>(2 – 4)    | 2.96<br>(2.47 – 3.79) | 58 393<br>(44 688 – 67 045)          | 186<br>(145 – 232)    | 0.04<br>(0.03 – 0.05) | 1769<br>(1601 – 1900)       | 506<br>(381 – 631)          |
| Cote d'Ivoire               | 6<br>(5 – 7)    | 3.92<br>(3.26 – 4.72) | 65 217<br>(46 680 – 80 859)          | 283<br>(230 – 348)    | 0.06<br>(0.05 – 0.08) | 1959<br>(1663 – 2225)       | 929<br>(671 – 1197)         |
| The Gambia                  | 2<br>(2 – 2)    | 5.31<br>(4.39 – 6.33) | 2790<br>(1133 – 4250)                | 146<br>(116 – 177)    | 0.06<br>(0.05 – 0.07) | 163<br>(135 – 184)          | 30<br>(20 – 39)             |
| Ghana                       | 6<br>(5 – 6)    | 4.79<br>(4.38 – 5.18) | 53 317<br>(44 430 – 62 866)          | 515<br>(415 – 618)    | 0.04<br>(0.04 – 0.05) | 2674<br>(2465 – 2855)       | 1686<br>(1319 – 2056)       |
| Guinea                      | 2<br>(1 – 2)    | 3.45<br>(2.88 – 4.14) | 43 783<br>(34 234 – 52 028)          | 100<br>(80 – 122)     | 0.05<br>(0.04 – 0.06) | 1319<br>(1174 – 1442)       | 208<br>(158 – 256)          |
| Guinea-Bissau               | 3<br>(3 – 4)    | 3.65<br>(3.05 – 4.35) | 5952<br>(4596 – 7065)                | 184<br>(146 – 228)    | 0.06<br>(0.05 – 0.07) | 176<br>(153 – 196)          | 53<br>(40 – 67)             |
| Liberia                     | 2<br>(1 – 2)    | 3.58<br>(2.99 – 4.36) | 15 502<br>(11 817 – 18 396)          | 102<br>(82 – 125)     | 0.06<br>(0.05 – 0.07) | 446<br>(388 – 493)          | 74<br>(55 – 93)             |
| Mali                        | 4<br>(4 – 5)    | 2.08<br>(1.84 – 2.33) | 96 252<br>(89 929 – 102 622)         | 245<br>(214 – 278)    | 0.03<br>(0.03 – 0.03) | 2571<br>(2465 – 2671)       | 1040<br>(909 – 1171)        |
| Mauritania                  | 4<br>(3 – 4)    | 5.25<br>(4.36 – 6.39) | 6893<br>(3621 – 9457)                | 186<br>(147 – 227)    | 0.08<br>(0.07 – 0.1)  | 231<br>(172 – 279)          | 70<br>(47 – 93)             |
| Niger                       | 2<br>(2 – 3)    | 2.41<br>(1.97 – 3.0)  | 97 816<br>(83 636 – 109 861)         | 100<br>(78 – 122)     | 0.04<br>(0.04 – 0.05) | 2520<br>(2253 – 2718)       | 459<br>(355 – 563)          |
| Nigeria                     | 6<br>(5 – 8)    | 3.54<br>(2.93 – 4.3)  | 595 624<br>(450 474 – 717 983)       | 269<br>(210 – 331)    | 0.06<br>(0.05 – 0.08) | 15 940<br>(13 191 – 18 072) | 8012<br>(5775 – 10 334)     |
| Sao Tome and Principe       | 9<br>(7 – 11)   | 4.94<br>(4.12 – 6.03) | 315<br>(156 – 439)                   | 419<br>(332 – 515)    | 0.09<br>(0.07 – 0.11) | 11<br>(7 – 13)              | 7<br>(4 – 10)               |
| Senegal                     | 3<br>(3 – 4)    | 4.16<br>(3.51 – 4.94) | 36 370<br>(25 259 – 45 456)          | 247<br>(197 – 301)    | 0.05<br>(0.04 – 0.06) | 1383<br>(1233 – 1510)       | 472<br>(361 – 595)          |
| Sierra Leone                | 2<br>(2 – 3)    | 6.14<br>(5.1 – 7.57)  | 7602<br>(2229 – 11 947)              | 245<br>(191 – 301)    | 0.05<br>(0.04 – 0.06) | 722<br>(648 – 786)          | 195<br>(141 – 252)          |
| Togo                        | 3<br>(2 – 3)    | 4.08<br>(3.43 – 4.93) | 20 583<br>(14 857 – 25 208)          | 150<br>(121 – 184)    | 0.06<br>(0.05 – 0.07) | 637<br>(539 – 714)          | 151<br>(110 – 193)          |

### 7.5 Sensitivity analysis – intermediate UHC standard for utilisation

We conducted a sensitivity analyses with an intermediate UHC standard for utilisation. For the main analysis, the additional admissions required was relatively larger than visits. As noted above, Portugal served as an intermediate UHC standard for utilisation with a smaller ratio of admissions to counterfactual DALYs and lower additional cost of inpatient admissions.

$$Cost_{ijkl} = \left( \left( \frac{volume_{Portugaljkl}}{DALY0_{S_{Portugaljkl}}} \right) - \left( \frac{volume_{ijkl}}{DALY0_{S_{ijkl}}} \right) \right) * DALY0_{S_{ijkl}} * unitcost_{ij} \quad (10)$$

where *DALY0* denotes the counterfactual DALYs with health access and quality removed, *i* refers country, *j* to the service (outpatient or inpatient), *k* to age category, and *l* to sex. As reported in Table S20, 0.23 billion additional admissions were needed, a 33% increase from current volume rather than a 49% increase; 7.67 billion additional visits were needed, a 19% increase from current volume rather than a 26% increase.

### 7.6 Sensitivity analysis – improvements in quality and types of service

Health systems differed in the quality and type of services they provide, as well as in the volume of services, and the main analysis did not account for these differences. Expenditures for improved quality and types of service would be reported in several NHA health care function categories such as curative care (HC 1), and rehabilitative care (HC 2), which were the topic of our analysis, as well as ancillary services (HC 4), medical goods (HC 5), governance and health system and financing administration (HC 7), and NHA capital account categories such as fixed capital formation (HK 1), and education and training of health personal (HKR.5).

For the recurrent costs of outpatient visits reported in NHA categories HC 1.3 and HC 2.3, improved quality and type of service would be reflected in longer visits, additional exams and medical goods during the visit, and some aspects of higher salaries. To the extent earnings are foregone during health professional education, which were not counted in category HKR.5, professionals would have higher salaries as a return on their investment. For the recurrent costs of inpatient admissions reported in NHA categories HC 1.1 and HC 1.2, improved quality and type of service would be reflected in more frequent rounds by the medical staff, additional exams and medical goods during the admission, infection control, hygiene, and nutrition, as well as some aspects of higher salaries.

Personnel was a large share of the cost of personal health services. For our sensitivity analysis, we assumed that the cost of personnel would increase as a fixed share of gross domestic product (GDP) per capita for a given level of quality and type of service. To estimate the fixed share, we regressed unit costs on GDP per capita, and the  $R^2$  for the regression was 0.50 for outpatient services and 0.55 for inpatient. Systematic differences above the fixed share would represent an increase in the quality and type of service.

To test the hypothesis that differences in unit cost across countries may be explained by differences in quality and type of service, we regressed unit costs on GDP per capita with splines at each GDP per capita quintile. The  $R^2$  for the regression was 0.60 for outpatient services and 0.63 for inpatient. At the Netherlands' GDP per capita, the ratio of the spline result and the fixed share, was 1.28 for outpatient unit costs and 1.24 for inpatient unit cost. In our sensitivity analysis reported in Table S21, we increased outpatient unit costs by 28% and inpatient unit costs by 24%.

A caveat to this sensitivity analysis is that the unit cost of services could differ across countries for other reasons, such as inefficiency and population density where remote facilities have fewer patients. Our analysis assumes that systematic differences represent only differences in quality and type of service.

**Table S20: Sensitivity analysis of national unit costs and funds needed to achieve an intermediate Universal Health Coverage standard for utilisation in 2016 in 2017 international dollars**

Table displays four sets of national estimates organised by GBD region: 1) cost per outpatient visit and inpatient admission by country, 2) aggregate ratio of total outpatient visits and inpatient admissions to counterfactual DALYs, where the counterfactual DALYs standardised the burden of disease across countries by removing the effects of access and quality of health care, 3) estimates of additional services needed to achieve an intermediate UHC standard for utilisation calculated by age and sex category, and 4) total cost of additional services in 2017 international dollars and as a percentage of 2016 gross domestic product. The cost of scaling up to the UHC utilisation standard was done at the age-sex level, leading some countries to have a cost of UHC scale-up greater than zero despite their aggregate utilisation per counterfactual DALY being greater than the standard set by the Portugal. For each result, the mean of 1,000 draws is reported, and in parenthesis the uncertainty interval defined as the 2.5<sup>th</sup> and 97.5<sup>th</sup> percentile of draws. DALY = disability-adjusted-life-year. GBD= Global Burden of Disease, UHC = Universal Health Coverage.

**Table S20: Sensitivity analysis of national unit costs and funds needed to achieve an intermediate Universal Health Coverage standard for utilisation in 2016 in 2017 international dollars**

|                                                  | Outpatient visits                                                  |                                                                             |                                                                           | Inpatient admissions                                                  |                                                                                |                                                                              | Total additional cost to meet UHC standards in millions 2017 PPP \$ (95% UI) |
|--------------------------------------------------|--------------------------------------------------------------------|-----------------------------------------------------------------------------|---------------------------------------------------------------------------|-----------------------------------------------------------------------|--------------------------------------------------------------------------------|------------------------------------------------------------------------------|------------------------------------------------------------------------------|
|                                                  | Unit cost per outpatient visit in 2017 PPP \$ (95% UI) (Table S14) | Ratio of total outpatient visits to counterfactual DALYs (95% UI) (Table 1) | Additional outpatient visits to meet UHC standard (95% UI) (in thousands) | Unit cost per inpatient admission in 2017 PPP \$ (95% UI) (Table S14) | Ratio of total inpatient admissions to counterfactual DALYs (95% UI) (Table 1) | Additional inpatient admissions to meet UHC standard (95% UI) (in thousands) |                                                                              |
| Global                                           | ..                                                                 | 6.7<br>(6.04 – 7.41)                                                        | 7 671 882<br>(5 332 598 – 9 750 543)                                      | ..                                                                    | 0.12<br>(0.11 – 0.13)                                                          | 233 699<br>(202 092 – 260 652)                                               | 745 588<br>(556 421 – 932 086)                                               |
| Low income                                       | ..                                                                 | ..                                                                          | 1 344 863<br>(996 539 – 1 637 357)                                        | ..                                                                    | ..                                                                             | 45 557<br>(39 521 – 50 117)                                                  | 34 717<br>(26 850 – 42 024)                                                  |
| Lower middle income                              | ..                                                                 | ..                                                                          | 4 637 681<br>(3 109 297 – 6 040 344)                                      | ..                                                                    | ..                                                                             | 151 005<br>(133 092 – 166 621)                                               | 336 021<br>(260 758 – 414 015)                                               |
| Upper middle income                              | ..                                                                 | ..                                                                          | 1 575 140<br>(1 111 949 – 2 005 508)                                      | ..                                                                    | ..                                                                             | 33 281<br>(25 194 – 40 082)                                                  | 278 137<br>(206 399 – 343 585)                                               |
| High income                                      | ..                                                                 | ..                                                                          | 114 197<br>(19 582 – 197 213)                                             | ..                                                                    | ..                                                                             | 3856<br>(1315 – 6041)                                                        | 96 714<br>(44 234 – 147 957)                                                 |
| Central Europe, Eastern Europe, and Central Asia | ..                                                                 | 10.82<br>(10.37 – 11.31)                                                    | 100 242<br>(69 304 – 130 366)                                             | ..                                                                    | 0.24<br>(0.23 – 0.25)                                                          | 1905<br>(889 – 3025)                                                         | 8117<br>(5807 – 10 548)                                                      |
| Central Asia                                     | ..                                                                 | 8.25<br>(7.95 – 8.54)                                                       | 40 050<br>(34 726 – 45 306)                                               | ..                                                                    | 0.17<br>(0.17 – 0.18)                                                          | 1147<br>(986 – 1295)                                                         | 4473<br>(3905 – 5042)                                                        |
| Armenia                                          | 48<br>(40 – 57)                                                    | 4.86<br>(4.67 – 5.05)                                                       | 4740<br>(4154 – 5342)                                                     | 1710<br>(1426 – 2019)                                                 | 0.16<br>(0.16 – 0.17)                                                          | 38<br>(28 – 47)                                                              | 295<br>(233 – 363)                                                           |
| Azerbaijan                                       | 62<br>(54 – 70)                                                    | 5.8<br>(5.53 – 6.08)                                                        | 7950<br>(6417 – 9565)                                                     | 4938<br>(4342 – 5613)                                                 | 0.08<br>(0.08 – 0.09)                                                          | 375<br>(339 – 411)                                                           | 2346<br>(1965 – 2762)                                                        |
| Georgia                                          | 31<br>(26 – 38)                                                    | 7.13<br>(6.13 – 8.43)                                                       | 1563<br>(70 – 3233)                                                       | 2408<br>(2128 – 2720)                                                 | 0.11<br>(0.1 – 0.11)                                                           | 122<br>(104 – 140)                                                           | 345<br>(260 – 444)                                                           |
| Kazakhstan                                       | 39<br>(35 – 43)                                                    | 8.27<br>(7.91 – 8.65)                                                       | 2192<br>(1056 – 3514)                                                     | 1872<br>(1699 – 2046)                                                 | 0.19<br>(0.18 – 0.2)                                                           | 132<br>(86 – 178)                                                            | 333<br>(220 – 463)                                                           |
| Kyrgyzstan                                       | 18<br>(16 – 20)                                                    | 4.06<br>(3.91 – 4.22)                                                       | 10 468<br>(9314 – 11 486)                                                 | 525<br>(472 – 595)                                                    | 0.17<br>(0.17 – 0.18)                                                          | 57<br>(35 – 76)                                                              | 216<br>(184 – 255)                                                           |
| Mongolia                                         | 22<br>(18 – 26)                                                    | 6.39<br>(5.38 – 7.61)                                                       | 1206<br>(388 – 2037)                                                      | 907<br>(717 – 1126)                                                   | 0.18<br>(0.15 – 0.22)                                                          | 22<br>(9 – 33)                                                               | 47<br>(23 – 74)                                                              |
| Tajikistan                                       | 9<br>(8 – 10)                                                      | 5.69<br>(5.44 – 5.96)                                                       | 4578<br>(3220 – 5907)                                                     | 410<br>(368 – 459)                                                    | 0.15<br>(0.15 – 0.16)                                                          | 124<br>(98 – 148)                                                            | 91<br>(71 – 112)                                                             |
| Turkmenistan                                     | 78<br>(68 – 89)                                                    | 4.81<br>(4.6 – 5.02)                                                        | 7068<br>(6054 – 8116)                                                     | 2182<br>(1706 – 2668)                                                 | 0.2<br>(0.16 – 0.24)                                                           | 30<br>(9 – 44)                                                               | 619<br>(497 – 758)                                                           |
| Uzbekistan                                       | 10<br>(9 – 11)                                                     | 11.85<br>(11.37 – 12.32)                                                    | 285<br>(–50 – 662)                                                        | 717<br>(648 – 790)                                                    | 0.21<br>(0.2 – 0.22)                                                           | 248<br>(181 – 313)                                                           | 181<br>(127 – 237)                                                           |
| Central Europe                                   | ..                                                                 | 10.21<br>(9.83 – 10.6)                                                      | 22 489<br>(16 758 – 27 964)                                               | ..                                                                    | 0.25<br>(0.23 – 0.27)                                                          | 221<br>(129 – 301)                                                           | 1925<br>(1426 – 2428)                                                        |
| Albania                                          | 36<br>(30 – 44)                                                    | 6.98<br>(5.92 – 8.13)                                                       | 1201<br>(–257 – 2770)                                                     | 2546<br>(2275 – 2879)                                                 | 0.12<br>(0.11 – 0.12)                                                          | 63<br>(47 – 79)                                                              | 208<br>(128 – 294)                                                           |
| Bosnia and Herzegovina                           | 25<br>(21 – 29)                                                    | 12.28<br>(10.83 – 14.43)                                                    | 0<br>(0 – 0)                                                              | 2550<br>(2104 – 3087)                                                 | 0.14<br>(0.12 – 0.16)                                                          | 37<br>(–11 – 77)                                                             | 99<br>(–25 – 227)                                                            |
| Bulgaria                                         | 68<br>(63 – 74)                                                    | 7.17<br>(6.7 – 7.63)                                                        | 2964<br>(1306 – 4559)                                                     | 1592<br>(1460 – 1728)                                                 | 0.35<br>(0.33 – 0.37)                                                          | 0<br>(0 – 0)                                                                 | 203<br>(89 – 323)                                                            |
| Croatia                                          | 69<br>(63 – 76)                                                    | 8.06<br>(7.74 – 8.42)                                                       | 746<br>(263 – 1237)                                                       | 2753<br>(2489 – 3067)                                                 | 0.23<br>(0.21 – 0.24)                                                          | 9<br>(–7 – 24)                                                               | 76<br>(8 – 148)                                                              |
| Czech Republic                                   | 64<br>(59 – 69)                                                    | 14.1<br>(13.48 – 14.84)                                                     | 0<br>(0 – 0)                                                              | 3035<br>(2546 – 3547)                                                 | 0.32<br>(0.28 – 0.38)                                                          | 0<br>(0 – 0)                                                                 | 0<br>(0 – 0)                                                                 |
| Hungary                                          | 42<br>(38 – 45)                                                    | 15.6<br>(15.03 – 16.24)                                                     | 0<br>(0 – 0)                                                              | 2764<br>(2528 – 3013)                                                 | 0.26<br>(0.24 – 0.28)                                                          | 0<br>(0 – 0)                                                                 | 0<br>(0 – 0)                                                                 |
| Macedonia                                        | 33<br>(28 – 38)                                                    | 8.32<br>(7.93 – 8.72)                                                       | 434<br>(288 – 579)                                                        | 2081<br>(1800 – 2521)                                                 | 0.15<br>(0.14 – 0.16)                                                          | 21<br>(9 – 31)                                                               | 59<br>(30 – 86)                                                              |
| Montenegro                                       | 33<br>(30 – 36)                                                    | 9.39<br>(8.79 – 9.95)                                                       | 18<br>(–8 – 42)                                                           | 2264<br>(2067 – 2469)                                                 | 0.16<br>(0.15 – 0.17)                                                          | 4<br>(1 – 6)                                                                 | 9<br>(3 – 14)                                                                |
| Poland                                           | 62<br>(57 – 67)                                                    | 10.21<br>(9.78 – 10.63)                                                     | 0<br>(0 – 0)                                                              | 2940<br>(2679 – 3219)                                                 | 0.24<br>(0.22 – 0.25)                                                          | 0<br>(0 – 0)                                                                 | 0<br>(0 – 0)                                                                 |
| Romania                                          | 58<br>(53 – 65)                                                    | 6.11<br>(5.83 – 6.38)                                                       | 16 799<br>(13 053 – 20 413)                                               | 1393<br>(1231 – 1568)                                                 | 0.29<br>(0.27 – 0.32)                                                          | 0<br>(0 – 0)                                                                 | 983<br>(730 – 1251)                                                          |
| Serbia                                           | 44<br>(40 – 48)                                                    | 9.3<br>(8.93 – 9.65)                                                        | 326<br>(–56 – 689)                                                        | 3155<br>(2844 – 3495)                                                 | 0.15<br>(0.14 – 0.16)                                                          | 87<br>(57 – 115)                                                             | 288<br>(182 – 404)                                                           |
| Slovakia                                         | 47<br>(43 – 52)                                                    | 16.97<br>(16.28 – 17.65)                                                    | 0<br>(0 – 0)                                                              | 3164<br>(2865 – 3499)                                                 | 0.28<br>(0.26 – 0.29)                                                          | 0<br>(0 – 0)                                                                 | 0<br>(0 – 0)                                                                 |
| Slovenia                                         | 100<br>(93 – 107)                                                  | 9.87<br>(9.49 – 10.25)                                                      | 0<br>(0 – 0)                                                              | 4347<br>(3986 – 4707)                                                 | 0.25<br>(0.23 – 0.26)                                                          | 0<br>(0 – 0)                                                                 | 0<br>(0 – 0)                                                                 |
| Eastern Europe                                   | ..                                                                 | 12.12<br>(11.51 – 12.8)                                                     | 37 703<br>(11 923 – 60 466)                                               | ..                                                                    | 0.26<br>(0.25 – 0.27)                                                          | 537<br>(–378 – 1583)                                                         | 1719<br>(–20 – 3699)                                                         |
| Belarus                                          | 23<br>(22 – 25)                                                    | 14.85<br>(14.32 – 15.42)                                                    | 0<br>(0 – 0)                                                              | 1348<br>(1122 – 1629)                                                 | 0.29<br>(0.24 – 0.35)                                                          | 4<br>(–16 – 21)                                                              | 6<br>(–21 – 29)                                                              |
| Estonia                                          | 66<br>(61 – 72)                                                    | 10.29<br>(9.92 – 10.66)                                                     | 3<br>(–59 – 63)                                                           | 3052<br>(2793 – 3329)                                                 | 0.24<br>(0.23 – 0.26)                                                          | 1<br>(–1 – 4)                                                                | 4<br>(–7 – 16)                                                               |
| Latvia                                           | 62<br>(57 – 69)                                                    | 8.75<br>(8.34 – 9.17)                                                       | 761<br>(480 – 1015)                                                       | 2578<br>(2346 – 2813)                                                 | 0.24<br>(0.23 – 0.25)                                                          | 2<br>(–2 – 6)                                                                | 53<br>(29 – 76)                                                              |
| Lithuania                                        | 53<br>(49 – 56)                                                    | 12.3<br>(11.85 – 12.79)                                                     | 0<br>(0 – 0)                                                              | 2186<br>(1984 – 2401)                                                 | 0.33<br>(0.31 – 0.35)                                                          | 0<br>(0 – 0)                                                                 | 0<br>(0 – 0)                                                                 |



|                           |                    |                          |                               |                             |                       |                       |                              |
|---------------------------|--------------------|--------------------------|-------------------------------|-----------------------------|-----------------------|-----------------------|------------------------------|
| Moldova                   | 17<br>(15 – 19)    | 7-79<br>(7-48 – 8-11)    | 1877<br>(1439 – 2296)         | 855<br>(760 – 966)          | 0-2<br>(0-19 – 0-21)  | 29<br>(18 – 40)       | 57<br>(43 – 73)              |
| Russia                    | 33<br>(31 – 36)    | 13-75<br>(13-08 – 14-58) | 0<br>(0 – 0)                  | 1941<br>(1808 – 2089)       | 0-26<br>(0-25 – 0-27) | 375<br>(-408 – 1322)  | 729<br>(-777 – 2588)         |
| Ukraine                   | 22<br>(18 – 26)    | 7-02<br>(6-07 – 8-37)    | 35 063<br>(9524 – 57 646)     | 694<br>(626 – 768)          | 0-26<br>(0-24 – 0-27) | 126<br>(-127 – 428)   | 870<br>(203 – 1611)          |
| High-income               | ..                 | 11-79<br>(10-78 – 12-88) | 144 294<br>(22 566 – 243 330) | ..                          | 0-2<br>(0-18 – 0-21)  | 3411<br>(817 – 5696)  | 88 366<br>(35 411 – 140 195) |
| Australasia               | ..                 | 11-79<br>(11-34 – 12-25) | 0<br>(0 – 0)                  | ..                          | 0-24<br>(0-22 – 0-26) | 10<br>(5 – 13)        | 62<br>(36 – 87)              |
| Australia                 | 154<br>(148 – 162) | 11-95<br>(11-49 – 12-43) | 0<br>(0 – 0)                  | 7334<br>(6669 – 8087)       | 0-24<br>(0-22 – 0-26) | 0<br>(0 – 0)          | 0<br>(0 – 0)                 |
| New Zealand               | 132<br>(120 – 146) | 10-93<br>(10-16 – 11-63) | 0<br>(0 – 0)                  | 6479<br>(5973 – 7007)       | 0-21<br>(0-21 – 0-22) | 10<br>(5 – 13)        | 62<br>(36 – 87)              |
| High-income Asia-Pacific  | ..                 | 22-92<br>(20-6 – 24-92)  | 0<br>(0 – 0)                  | ..                          | 0-18<br>(0-16 – 0-21) | 649<br>(-1137 – 2068) | 7375<br>(-10193 – 24 970)    |
| Brunei                    | 68<br>(54 – 83)    | 15-62<br>(13-29 – 19-64) | 0<br>(0 – 0)                  | 5260<br>(4199 – 6551)       | 0-19<br>(0-15 – 0-22) | 1<br>(0 – 2)          | 4<br>(-1 – 8)                |
| Japan                     | 76<br>(67 – 88)    | 22-42<br>(19-46 – 24-99) | 0<br>(0 – 0)                  | 10 335<br>(8572 – 12 472)   | 0-16<br>(0-13 – 0-19) | 646<br>(-1142 – 2064) | 7349<br>(-10095 – 24 915)    |
| Singapore                 | 79<br>(65 – 95)    | 22-68<br>(19-12 – 27-38) | 0<br>(0 – 0)                  | 9132<br>(7516 – 11 044)     | 0-18<br>(0-15 – 0-21) | 2<br>(-8 – 9)         | 22<br>(-65 – 84)             |
| South Korea               | 50<br>(47 – 53)    | 24-33<br>(23-24 – 25-44) | 0<br>(0 – 0)                  | 4878<br>(4492 – 5261)       | 0-24<br>(0-23 – 0-26) | 0<br>(0 – 0)          | 0<br>(0 – 0)                 |
| High-income North America | ..                 | 8-79<br>(7-79 – 9-87)    | 44 453<br>(-19932 – 98 535)   | ..                          | 0-17<br>(0-15 – 0-18) | 1630<br>(778 – 2388)  | 57 367<br>(19 395 – 92 458)  |
| Canada                    | 157<br>(148 – 167) | 12-99<br>(12-23 – 13-69) | 0<br>(0 – 0)                  | 10 103<br>(8448 – 12 088)   | 0-19<br>(0-16 – 0-23) | 110<br>(-58 – 244)    | 1134<br>(-525 – 2626)        |
| Greenland                 | ..                 | 8-7<br>(7-52 – 10-28)    | 8<br>(-2 – 15)                | ..                          | 0-15<br>(0-12 – 0-18) | 0<br>(0 – 1)          | 0<br>(0 – 0)                 |
| United States             | 478<br>(415 – 548) | 8-33<br>(7-25 – 9-52)    | 44 445<br>(-19932 – 98 515)   | 22 543<br>(20 547 – 24 392) | 0-17<br>(0-15 – 0-18) | 1520<br>(782 – 2189)  | 56 233<br>(18 908 – 90 532)  |
| Southern Latin America    | ..                 | 5-92<br>(5-32 – 6-71)    | 61 151<br>(30 041 – 85 996)   | ..                          | 0-12<br>(0-1 – 0-14)  | 1070<br>(420 – 1670)  | 12 288<br>(7386 – 17 117)    |
| Argentina                 | 86<br>(71 – 101)   | 6-1<br>(5-28 – 7-18)     | 36 716<br>(7876 – 60 261)     | 4211<br>(3507 – 5052)       | 0-12<br>(0-1 – 0-14)  | 649<br>(147 – 1098)   | 6051<br>(2387 – 9725)        |
| Chile                     | 131<br>(125 – 138) | 5-48<br>(5-31 – 5-68)    | 21 412<br>(18 669 – 24 349)   | 5956<br>(5252 – 6721)       | 0-12<br>(0-11 – 0-14) | 253<br>(91 – 400)     | 4338<br>(3142 – 5495)        |
| Uruguay                   | 118<br>(100 – 139) | 6-08<br>(5-29 – 7-06)    | 3023<br>(859 – 4743)          | 9102<br>(7505 – 10 776)     | 0-08<br>(0-07 – 0-09) | 167<br>(126 – 201)    | 1899<br>(1237 – 2541)        |
| Western Europe            | ..                 | 10-65<br>(9-86 – 11-58)  | 38 690<br>(4608 – 72 088)     | ..                          | 0-24<br>(0-22 – 0-25) | 53<br>(-37 – 140)     | 11 274<br>(1608 – 22 257)    |
| Andorra                   | 367<br>(311 – 429) | 10-72<br>(9-35 – 12-3)   | 0<br>(0 – 0)                  | 15 054<br>(12 308 – 18 392) | 0-24<br>(0-2 – 0-29)  | 0<br>(0 – 0)          | 0<br>(0 – 0)                 |
| Austria                   | 187<br>(179 – 196) | 11-15<br>(10-71 – 11-61) | 0<br>(0 – 0)                  | 5357<br>(5044 – 5663)       | 0-37<br>(0-35 – 0-39) | 0<br>(0 – 0)          | 0<br>(0 – 0)                 |
| Belgium                   | 147<br>(131 – 162) | 13-54<br>(12-39 – 15-04) | 0<br>(0 – 0)                  | 7869<br>(7298 – 8435)       | 0-24<br>(0-22 – 0-26) | 0<br>(0 – 0)          | 0<br>(0 – 0)                 |
| Cyprus                    | 110<br>(93 – 130)  | 8-51<br>(7-29 – 9-82)    | 183<br>(-131 – 432)           | 5938<br>(4956 – 7154)       | 0-15<br>(0-13 – 0-18) | 2<br>(-4 – 7)         | 35<br>(-15 – 82)             |
| Denmark                   | 267<br>(256 – 281) | 7-82<br>(7-55 – 8-09)    | 108<br>(-32 – 265)            | 9136<br>(8556 – 9721)       | 0-22<br>(0-21 – 0-23) | 0<br>(0 – 0)          | 29<br>(-9 – 71)              |
| Finland                   | 229<br>(218 – 240) | 7-16<br>(6-84 – 7-47)    | 1301<br>(506 – 2151)          | 6627<br>(6175 – 7104)       | 0-24<br>(0-22 – 0-25) | 0<br>(0 – 0)          | 299<br>(114 – 507)           |
| France                    | 170<br>(163 – 178) | 11-44<br>(11-01 – 11-89) | 0<br>(0 – 0)                  | 6576<br>(6049 – 7063)       | 0-28<br>(0-26 – 0-31) | 0<br>(0 – 0)          | 0<br>(0 – 0)                 |
| Germany                   | 159<br>(143 – 175) | 13-86<br>(12-63 – 15-39) | 0<br>(0 – 0)                  | 6050<br>(5674 – 6445)       | 0-34<br>(0-33 – 0-36) | 0<br>(0 – 0)          | 0<br>(0 – 0)                 |
| Greece                    | 122<br>(102 – 146) | 6-75<br>(5-79 – 7-93)    | 6358<br>(1353 – 10 464)       | 3176<br>(2623 – 3857)       | 0-25<br>(0-21 – 0-3)  | 0<br>(0 – 0)          | 800<br>(144 – 1486)          |
| Iceland                   | 180<br>(171 – 193) | 10-14<br>(9-69 – 10-57)  | 0<br>(0 – 0)                  | 9402<br>(8699 – 10 124)     | 0-18<br>(0-17 – 0-2)  | 0<br>(0 – 0)          | 1<br>(-2 – 4)                |
| Ireland                   | 170<br>(153 – 189) | 13-09<br>(12-21 – 13-88) | 0<br>(0 – 0)                  | 10 189<br>(9131 – 11 362)   | 0-21<br>(0-19 – 0-22) | 0<br>(0 – 0)          | 0<br>(0 – 0)                 |
| Israel                    | 86<br>(73 – 99)    | 12-32<br>(10-77 – 14-4)  | 0<br>(0 – 0)                  | 4183<br>(3879 – 4499)       | 0-24<br>(0-23 – 0-26) | 0<br>(0 – 0)          | 0<br>(0 – 0)                 |
| Italy                     | 103<br>(91 – 115)  | 12-73<br>(11-46 – 14-42) | 0<br>(0 – 0)                  | 7259<br>(6625 – 7897)       | 0-17<br>(0-16 – 0-19) | 0<br>(0 – 0)          | 0<br>(0 – 0)                 |
| Luxembourg                | 274<br>(253 – 299) | 10-79<br>(10-34 – 11-26) | 0<br>(0 – 0)                  | 12 262<br>(11 100 – 13 522) | 0-22<br>(0-21 – 0-24) | 0<br>(0 – 0)          | 0<br>(0 – 0)                 |
| Malta                     | 76<br>(66 – 90)    | 18-82<br>(16-05 – 21-55) | 0<br>(0 – 0)                  | 7422<br>(6179 – 8997)       | 0-19<br>(0-15 – 0-23) | 0<br>(0 – 0)          | 0<br>(0 – 0)                 |
| Netherlands               | 312<br>(282 – 343) | 7-25<br>(6-67 – 7-89)    | 2394<br>(-976 – 5122)         | 12 313<br>(10 701 – 14 114) | 0-17<br>(0-15 – 0-2)  | 7<br>(-27 – 33)       | 851<br>(-259 – 1874)         |
| Norway                    | 413<br>(388 – 438) | 7-21<br>(6-92 – 7-51)    | 719<br>(105 – 1275)           | 10 060<br>(9375 – 10 820)   | 0-27<br>(0-26 – 0-29) | 0<br>(0 – 0)          | 298<br>(41 – 544)            |
| Portugal                  | 139<br>(128 – 155) | 7-01<br>(6-43 – 7-52)    | 0<br>(0 – 0)                  | 6610<br>(6121 – 7147)       | 0-14<br>(0-14 – 0-15) | 0<br>(0 – 0)          | 0<br>(0 – 0)                 |
| Spain                     | 124<br>(110 – 140) | 10-6<br>(9-45 – 11-9)    | 0<br>(0 – 0)                  | 8027<br>(7567 – 8480)       | 0-16<br>(0-15 – 0-17) | 43<br>(-32 – 119)     | 345<br>(-253 – 967)          |
| Sweden                    | 402<br>(343 – 467) | 5-7<br>(4-87 – 6-63)     | 8530<br>(1882 – 14 483)       | 11 249<br>(9420 – 13 328)   | 0-19<br>(0-16 – 0-23) | 0<br>(0 – 0)          | 3534<br>(653 – 6769)         |

|                                     |                    |                          |                                |                             |                       |                             |                               |
|-------------------------------------|--------------------|--------------------------|--------------------------------|-----------------------------|-----------------------|-----------------------------|-------------------------------|
| Switzerland                         | 398<br>(369 – 428) | 7-88<br>(7.36 – 8.41)    | 1623<br>(-100 – 3412)          | 12 421<br>(11 587 – 13 301) | 0-24<br>(0-22 – 0-25) | 0<br>(0 – 0)                | 655<br>(-36 – 1417)           |
| United Kingdom                      | 243<br>(210 – 284) | 7-01<br>(6.1 – 8.07)     | 17 474<br>(-2881 – 38 805)     | 9037<br>(7699 – 10 398)     | 0-18<br>(0-16 – 0-21) | 1<br>(0 – 2)                | 4426<br>(-604 – 10 847)       |
| Latin America and Caribbean         | ..                 | 6-47<br>(5.79 – 7.22)    | 429 733<br>(266 574 – 564 471) | ..                          | 0-1<br>(0-09 – 0-11)  | 17 826<br>(13 460 – 21 257) | 105 081<br>(76 735 – 132 864) |
| Andean Latin America                | ..                 | 7-78<br>(6.65 – 9.5)     | 2826<br>(-7415 – 10 904)       | ..                          | 0-1<br>(0-09 – 0-11)  | 1873<br>(1477 – 2209)       | 4916<br>(3505 – 6403)         |
| Bolivia                             | 25<br>(19 – 30)    | 7-42<br>(6.21 – 9.26)    | 2176<br>(-2786 – 5953)         | 1576<br>(1264 – 1899)       | 0-1<br>(0-08 – 0-12)  | 360<br>(256 – 449)          | 629<br>(355 – 886)            |
| Ecuador                             | 54<br>(43 – 67)    | 7-86<br>(6.57 – 9.5)     | 329<br>(-2353 – 2284)          | 3297<br>(2890 – 3777)       | 0-1<br>(0-1 – 0-11)   | 541<br>(496 – 588)          | 1811<br>(1503 – 2149)         |
| Peru                                | 38<br>(29 – 45)    | 7-86<br>(6.72 – 9.76)    | 321<br>(-5049 – 4640)          | 2499<br>(2011 – 3035)       | 0-09<br>(0-08 – 0-11) | 972<br>(665 – 1230)         | 2477<br>(1435 – 3677)         |
| Caribbean                           | ..                 | 4-26<br>(3.66 – 4.9)     | 93 521<br>(73 791 – 111 812)   | ..                          | 0-1<br>(0-08 – 0-11)  | 1454<br>(1005 – 1836)       | 9127<br>(6428 – 12 198)       |
| Antigua and Barbuda                 | 111<br>(92 – 136)  | 5-29<br>(4.47 – 6.18)    | 125<br>(71 – 177)              | 4667<br>(3697 – 5695)       | 0-1<br>(0-08 – 0-12)  | 2<br>(1 – 3)                | 26<br>(15 – 38)               |
| The Bahamas                         | 136<br>(112 – 167) | 6-13<br>(5.18 – 7.21)    | 277<br>(32 – 489)              | 4931<br>(3892 – 6170)       | 0-13<br>(0-11 – 0-16) | 6<br>(3 – 9)                | 70<br>(26 – 114)              |
| Barbados                            | 164<br>(137 – 197) | 3-34<br>(2.85 – 3.86)    | 802<br>(689 – 916)             | 2790<br>(2236 – 3425)       | 0-15<br>(0-13 – 0-18) | 2<br>(-1 – 4)               | 139<br>(100 – 183)            |
| Belize                              | 55<br>(44 – 67)    | 3-81<br>(3.19 – 4.5)     | 764<br>(562 – 944)             | 2368<br>(1883 – 2884)       | 0-07<br>(0-06 – 0-09) | 17<br>(12 – 20)             | 82<br>(57 – 108)              |
| Bermuda                             | ..                 | 5-96<br>(5.06 – 6.97)    | 63<br>(26 – 97)                | ..                          | 0-13<br>(0-11 – 0-15) | 1<br>(0 – 1)                | 0<br>(0 – 0)                  |
| Cuba                                | 90<br>(72 – 113)   | 4-29<br>(3.65 – 4.91)    | 24 042<br>(17 896 – 30 134)    | 2760<br>(2160 – 3595)       | 0-11<br>(0-09 – 0-13) | 237<br>(45 – 406)           | 2884<br>(1733 – 4277)         |
| Dominica                            | 33<br>(27 – 40)    | 7-58<br>(6.41 – 8.85)    | 30<br>(-1 – 59)                | 1995<br>(1587 – 2447)       | 0-1<br>(0-09 – 0-12)  | 2<br>(1 – 3)                | 5<br>(2 – 8)                  |
| Dominican Republic                  | 92<br>(77 – 112)   | 4-5<br>(3.84 – 5.26)     | 19 512<br>(13 665 – 24 658)    | 2760<br>(2180 – 3365)       | 0-12<br>(0-1 – 0-14)  | 201<br>(119 – 271)          | 2400<br>(1536 – 3377)         |
| Grenada                             | 66<br>(54 – 81)    | 4-55<br>(3.88 – 5.35)    | 197<br>(136 – 251)             | 2435<br>(1949 – 2959)       | 0-1<br>(0-08 – 0-12)  | 3<br>(2 – 4)                | 21<br>(14 – 30)               |
| Guyana                              | 20<br>(16 – 25)    | 6-09<br>(5.08 – 7.13)    | 647<br>(140 – 1113)            | 1796<br>(1393 – 2278)       | 0-06<br>(0-05 – 0-07) | 44<br>(37 – 50)             | 93<br>(61 – 128)              |
| Haiti                               | 14<br>(11 – 17)    | 2-95<br>(2.46 – 3.44)    | 32 766<br>(28 089 – 37 127)    | 558<br>(447 – 679)          | 0-07<br>(0-06 – 0-08) | 621<br>(487 – 726)          | 808<br>(605 – 1021)           |
| Jamaica                             | 72<br>(59 – 87)    | 2-75<br>(2.34 – 3.18)    | 8719<br>(7726 – 9666)          | 4186<br>(3349 – 5145)       | 0-04<br>(0-03 – 0-05) | 215<br>(196 – 232)          | 1538<br>(1229 – 1873)         |
| Puerto Rico                         | ..                 | 8-71<br>(7.46 – 10.12)   | 606<br>(-925 – 1749)           | ..                          | 0-12<br>(0-1 – 0-14)  | 67<br>(13 – 114)            | 0<br>(0 – 0)                  |
| Saint Lucia                         | 53<br>(43 – 64)    | 5-98<br>(5.08 – 6.96)    | 200<br>(85 – 305)              | 2565<br>(2036 – 3158)       | 0-1<br>(0-08 – 0-12)  | 5<br>(3 – 7)                | 24<br>(13 – 36)               |
| Saint Vincent and the<br>Grenadines | 49<br>(41 – 60)    | 4-24<br>(3.62 – 4.96)    | 224<br>(162 – 280)             | 1799<br>(1457 – 2211)       | 0-09<br>(0-08 – 0-11) | 4<br>(2 – 5)                | 18<br>(12 – 25)               |
| Suriname                            | 83<br>(68 – 101)   | 4-49<br>(3.81 – 5.21)    | 992<br>(698 – 1259)            | 3128<br>(2467 – 3886)       | 0-09<br>(0-08 – 0-11) | 16<br>(8 – 22)              | 135<br>(83 – 189)             |
| Trinidad and Tobago                 | 239<br>(197 – 288) | 3-73<br>(3.18 – 4.36)    | 3458<br>(2805 – 4063)          | 4557<br>(3604 – 5575)       | 0-15<br>(0-12 – 0-18) | 9<br>(-1 – 18)              | 881<br>(599 – 1189)           |
| Virgin Islands U.S.                 | ..                 | 5-98<br>(5.03 – 7.05)    | 97<br>(27 – 163)               | ..                          | 0-14<br>(0-11 – 0-16) | 1<br>(0 – 2)                | 0<br>(0 – 0)                  |
| Central Latin America               | ..                 | 5-94<br>(5.09 – 6.85)    | 288 197<br>(175 621 – 378 926) | ..                          | 0-08<br>(0-07 – 0-09) | 11 568<br>(9594 – 13 023)   | 75 430<br>(56 982 – 93 597)   |
| Colombia                            | 41<br>(34 – 50)    | 8-86<br>(7.54 – 10.35)   | 1830<br>(-5168 – 7560)         | 5897<br>(5084 – 6673)       | 0-05<br>(0-05 – 0-05) | 3028<br>(2829 – 3190)       | 17 952<br>(14 757 – 20 748)   |
| Costa Rica                          | 136<br>(111 – 166) | 4-38<br>(3.71 – 5.15)    | 9502<br>(6907 – 11 800)        | 6305<br>(5007 – 7685)       | 0-07<br>(0-06 – 0-09) | 208<br>(152 – 250)          | 2635<br>(1844 – 3464)         |
| El Salvador                         | 88<br>(78 – 100)   | 2-61<br>(2.38 – 2.82)    | 21 395<br>(20 103 – 22 609)    | 6919<br>(5851 – 8226)       | 0-03<br>(0-02 – 0-03) | 522<br>(497 – 544)          | 5520<br>(4741 – 6352)         |
| Guatemala                           | 32<br>(25 – 39)    | 5-98<br>(4.97 – 7.24)    | 11 135<br>(-1316 – 20 498)     | 2220<br>(1764 – 2695)       | 0-07<br>(0-06 – 0-08) | 778<br>(579 – 932)          | 2110<br>(1283 – 2974)         |
| Honduras                            | 26<br>(21 – 32)    | 5-59<br>(4.63 – 6.59)    | 8993<br>(3415 – 13 725)        | 1696<br>(1311 – 2134)       | 0-07<br>(0-06 – 0-09) | 386<br>(276 – 470)          | 904<br>(538 – 1268)           |
| Mexico                              | 95<br>(80 – 112)   | 4-99<br>(4.29 – 5.77)    | 177 619<br>(102 283 – 239 636) | 4577<br>(3592 – 5576)       | 0-08<br>(0-07 – 0-1)  | 5106<br>(3677 – 6148)       | 40 779<br>(27 044 – 54 397)   |
| Nicaragua                           | 19<br>(16 – 24)    | 8-49<br>(7.13 – 9.97)    | 0<br>(0 – 0)                   | 1907<br>(1511 – 2342)       | 0-07<br>(0-06 – 0-09) | 275<br>(201 – 333)          | 529<br>(312 – 754)            |
| Panama                              | 54<br>(44 – 65)    | 13-79<br>(11.76 – 15.98) | 0<br>(0 – 0)                   | 4095<br>(3338 – 5056)       | 0-14<br>(0-12 – 0-16) | 37<br>(15 – 57)             | 156<br>(54 – 270)             |
| Venezuela                           | 46<br>(37 – 58)    | 4-8<br>(4.01 – 5.65)     | 57 724<br>(41 471 – 71 072)    | 1717<br>(1376 – 2124)       | 0-1<br>(0-08 – 0-12)  | 1229<br>(1032 – 1385)       | 4845<br>(3500 – 6349)         |
| Tropical Latin America              | ..                 | 7-27<br>(6.79 – 7.79)    | 45 188<br>(9685 – 80 636)      | ..                          | 0-12<br>(0-11 – 0-14) | 2931<br>(1052 – 4428)       | 15 609<br>(6374 – 24 035)     |
| Brazil                              | 87<br>(77 – 97)    | 7-33<br>(6.85 – 7.85)    | 38 197<br>(5433 – 71 518)      | 4054<br>(3403 – 4761)       | 0-12<br>(0-11 – 0-14) | 2682<br>(823 – 4150)        | 14 434<br>(5419 – 22 630)     |
| Paraguay                            | 58<br>(47 – 71)    | 5-51<br>(4.68 – 6.51)    | 6991<br>(2362 – 11 051)        | 3009<br>(2402 – 3707)       | 0-09<br>(0-07 – 0-1)  | 249<br>(194 – 296)          | 1175<br>(755 – 1624)          |
| North Africa and Middle East        | ..                 | 7-13<br>(6.31 – 8.23)    | 480 071<br>(325 711 – 604 263) | ..                          | 0-12<br>(0-11 – 0-14) | 15 169<br>(10 603 – 18 663) | 77 601<br>(50 229 – 104 246)  |
| Afghanistan                         | 6<br>(5 – 8)       | 5-61<br>(4.67 – 6.9)     | 37 604<br>(11 272 – 57 369)    | 599<br>(457 – 769)          | 0-08<br>(0-07 – 0-1)  | 1600<br>(1029 – 2083)       | 1228<br>(691 – 1800)          |

|                                      |                    |                          |                                      |                             |                       |                             |                                |
|--------------------------------------|--------------------|--------------------------|--------------------------------------|-----------------------------|-----------------------|-----------------------------|--------------------------------|
| Algeria                              | 70<br>(57 – 85)    | 5-61<br>(4-74 – 6-66)    | 31 065<br>(16 551 – 43 470)          | 3787<br>(2864 – 4793)       | 0-12<br>(0-1 – 0-16)  | 622<br>(265 – 945)          | 4655<br>(2368 – 6967)          |
| Bahrain                              | 103<br>(79 – 127)  | 10-69<br>(8-81 – 13-26)  | 8<br>(-11 – 27)                      | 20 526<br>(15 697 – 25 631) | 0-06<br>(0-05 – 0-07) | 60<br>(45 – 71)             | 1252<br>(713 – 1761)           |
| Egypt                                | 18<br>(14 – 21)    | 9-29<br>(7-89 – 11-49)   | 533<br>(-3637 – 3872)                | 1087<br>(860 – 1345)        | 0-18<br>(0-15 – 0-21) | 911<br>(459 – 1275)         | 1014<br>(436 – 1567)           |
| Iran                                 | 67<br>(54 – 81)    | 7-23<br>(6-21 – 8-57)    | 7361<br>(-14925 – 28 503)            | 7217<br>(5582 – 9069)       | 0-08<br>(0-07 – 0-1)  | 3235<br>(2008 – 4095)       | 24 303<br>(11 874 – 36 526)    |
| Iraq                                 | 74<br>(58 – 94)    | 2-33<br>(1-94 – 2-77)    | 125 446<br>(108 570 – 139 641)       | 2387<br>(1762 – 3169)       | 0-09<br>(0-07 – 0-11) | 1437<br>(771 – 1927)        | 12 933<br>(8986 – 17 042)      |
| Jordan                               | 54<br>(43 – 67)    | 4-73<br>(3-97 – 5-69)    | 10 625<br>(4837 – 15 140)            | 1240<br>(962 – 1571)        | 0-25<br>(0-2 – 0-3)   | 34<br>(15 – 48)             | 628<br>(250 – 1023)            |
| Kuwait                               | 149<br>(117 – 183) | 8-64<br>(7-24 – 10-59)   | 30<br>(-73 – 110)                    | 10 690<br>(7952 – 14 003)   | 0-13<br>(0-1 – 0-16)  | 36<br>(6 – 61)              | 403<br>(51 – 804)              |
| Lebanon                              | 85<br>(67 – 105)   | 5-16<br>(4-34 – 6-15)    | 9506<br>(5086 – 13 213)              | 5140<br>(4048 – 6350)       | 0-1<br>(0-08 – 0-12)  | 187<br>(130 – 240)          | 1803<br>(1120 – 2516)          |
| Libya                                | 31<br>(24 – 39)    | 7-93<br>(6-81 – 9-44)    | 547<br>(-812 – 1721)                 | 2182<br>(1628 – 2884)       | 0-13<br>(0-11 – 0-16) | 75<br>(21 – 118)            | 188<br>(45 – 339)              |
| Morocco                              | 34<br>(27 – 42)    | 4-78<br>(3-97 – 5-83)    | 62 709<br>(37 816 – 83 787)          | 3715<br>(2898 – 4670)       | 0-05<br>(0-04 – 0-07) | 2074<br>(1763 – 2316)       | 9970<br>(7170 – 12 970)        |
| Oman                                 | 80<br>(62 – 101)   | 9-14<br>(7-59 – 11-27)   | 3<br>(-23 – 27)                      | 14 217<br>(10 795 – 18 105) | 0-06<br>(0-05 – 0-07) | 210<br>(160 – 248)          | 3029<br>(1744 – 4399)          |
| Palestine                            | 12<br>(10 – 15)    | 5-21<br>(4-37 – 6-19)    | 1652<br>(-187 – 3334)                | 964<br>(721 – 1298)         | 0-08<br>(0-07 – 0-11) | 193<br>(127 – 244)          | 211<br>(111 – 327)             |
| Qatar                                | 118<br>(89 – 151)  | 14-61<br>(11-97 – 17-89) | 0<br>(0 – 0)                         | 13 771<br>(9948 – 18 967)   | 0-13<br>(0-1 – 0-17)  | 16<br>(5 – 26)              | 227<br>(52 – 440)              |
| Saudi Arabia                         | 134<br>(110 – 161) | 10-55<br>(9-09 – 12-28)  | 265<br>(-91 – 613)                   | 13 062<br>(10 279 – 16 358) | 0-12<br>(0-1 – 0-14)  | 440<br>(253 – 607)          | 5879<br>(2843 – 9190)          |
| Sudan                                | 15<br>(12 – 20)    | 5-5<br>(4-62 – 6-7)      | 43 870<br>(6945 – 69 732)            | 1197<br>(898 – 1595)        | 0-09<br>(0-07 – 0-11) | 1403<br>(816 – 1849)        | 2429<br>(1259 – 3691)          |
| Syria                                | 14<br>(11 – 17)    | 5-06<br>(4-27 – 6-03)    | 44 330<br>(28 732 – 56 973)          | 673<br>(521 – 866)          | 0-13<br>(0-1 – 0-15)  | 394<br>(110 – 618)          | 886<br>(484 – 1292)            |
| Tunisia                              | 40<br>(32 – 48)    | 7-28<br>(6-22 – 8-71)    | 1820<br>(-1866 – 5231)               | 3401<br>(2684 – 4247)       | 0-1<br>(0-09 – 0-12)  | 286<br>(179 – 379)          | 1070<br>(558 – 1676)           |
| Turkey                               | 34<br>(30 – 39)    | 12-18<br>(11-65 – 12-72) | 0<br>(0 – 0)                         | 2190<br>(1886 – 2518)       | 0-22<br>(0-21 – 0-23) | 251<br>(137 – 358)          | 551<br>(290 – 806)             |
| United Arab Emirates                 | 137<br>(104 – 173) | 8-49<br>(6-81 – 10-95)   | 12<br>(-8 – 30)                      | 13 130<br>(10 010 – 16 708) | 0-09<br>(0-08 – 0-12) | 131<br>(22 – 212)           | 1794<br>(232 – 3404)           |
| Yemen                                | 18<br>(14 – 23)    | 2-5<br>(2-22 – 2-81)     | 102 684<br>(93 336 – 111 066)        | 804<br>(581 – 1108)         | 0-07<br>(0-06 – 0-09) | 1575<br>(1046 – 1979)       | 3148<br>(2298 – 4223)          |
| South Asia                           | ..                 | 4-67<br>(3-93 – 5-48)    | 3 099 706<br>(2 152 185 – 3 975 235) | ..                          | 0-07<br>(0-06 – 0-08) | 82 034<br>(70 568 – 91 590) | 103 716<br>(79 656 – 130 388)  |
| Bangladesh                           | 5<br>(4 – 6)       | 4-39<br>(3-69 – 5-18)    | 325 237<br>(230 983 – 412 210)       | 326<br>(257 – 410)          | 0-07<br>(0-06 – 0-08) | 8392<br>(6403 – 9888)       | 4379<br>(2978 – 5721)          |
| Bhutan                               | 14<br>(11 – 17)    | 5-91<br>(5-0 – 6-92)     | 701<br>(228 – 1101)                  | 842<br>(667 – 1078)         | 0-1<br>(0-08 – 0-12)  | 20<br>(10 – 28)             | 28<br>(14 – 41)                |
| India                                | 14<br>(11 – 17)    | 4-59<br>(3-82 – 5-4)     | 2 524 223<br>(1 777 704 – 3 221 116) | 875<br>(731 – 1048)         | 0-07<br>(0-07 – 0-08) | 62 691<br>(54 733 – 69 966) | 91 319<br>(69 745 – 115 220)   |
| Nepal                                | 13<br>(11 – 16)    | 2-65<br>(2-24 – 3-07)    | 92 524<br>(81 292 – 103 467)         | 518<br>(411 – 660)          | 0-07<br>(0-06 – 0-08) | 1515<br>(1140 – 1809)       | 2002<br>(1513 – 2553)          |
| Pakistan                             | 6<br>(5 – 7)       | 5-76<br>(4-89 – 6-74)    | 157 021<br>(37 804 – 266 053)        | 525<br>(399 – 667)          | 0-07<br>(0-06 – 0-08) | 9416<br>(7025 – 11 186)     | 5988<br>(3708 – 8358)          |
| Southeast Asia East Asia and Oceania | ..                 | 6-69<br>(6-11 – 7-29)    | 1 345 835<br>(823 859 – 1 824 889)   | ..                          | 0-14<br>(0-13 – 0-15) | 48 720<br>(43 656 – 53 187) | 273 613<br>(211 011 – 338 345) |
| East Asia                            | ..                 | 7-1<br>(6-6 – 7-59)      | 610 327<br>(350 490 – 871 210)       | ..                          | 0-18<br>(0-17 – 0-2)  | 3892<br>(1290 – 6254)       | 42 736<br>(24 791 – 61 928)    |
| China                                | 59<br>(54 – 65)    | 6-73<br>(6-28 – 7-17)    | 609 789<br>(350 987 – 870 188)       | 1609<br>(1448 – 1790)       | 0-18<br>(0-17 – 0-2)  | 3515<br>(1149 – 5707)       | 42 091<br>(24 461 – 61 155)    |
| North Korea                          | 5<br>(4 – 6)       | 7-98<br>(6-79 – 9-38)    | 539<br>(-1176 – 1856)                | 247<br>(200 – 300)          | 0-14<br>(0-12 – 0-16) | 282<br>(5 – 487)            | 74<br>(5 – 141)                |
| Taiwan                               | 45<br>(37 – 55)    | 31-05<br>(26-72 – 36-07) | 0<br>(0 – 0)                         | 5845<br>(4615 – 7279)       | 0-17<br>(0-14 – 0-2)  | 95<br>(-8 – 182)            | 570<br>(-38 – 1242)            |
| Oceania                              | ..                 | 6-17<br>(5-19 – 7-76)    | 8902<br>(1341 – 13 598)              | ..                          | 0-07<br>(0-06 – 0-09) | 502<br>(375 – 612)          | 401<br>(249 – 544)             |
| American Samoa                       | ..                 | 9-87<br>(8-28 – 11-83)   | 2<br>(-5 – 9)                        | ..                          | 0-09<br>(0-08 – 0-11) | 2<br>(1 – 3)                | 0<br>(0 – 0)                   |
| Federated States of Micronesia       | 16<br>(13 – 19)    | 8-2<br>(6-88 – 9-65)     | 29<br>(6 – 48)                       | 1153<br>(931 – 1393)        | 0-09<br>(0-07 – 0-11) | 4<br>(2 – 5)                | 5<br>(3 – 7)                   |
| Fiji                                 | 19<br>(15 – 23)    | 8-78<br>(7-32 – 10-99)   | 292<br>(38 – 527)                    | 1509<br>(1208 – 1794)       | 0-08<br>(0-07 – 0-1)  | 36<br>(25 – 46)             | 61<br>(34 – 87)                |
| Guam                                 | ..                 | 10-14<br>(8-73 – 11-96)  | 3<br>(-3 – 9)                        | ..                          | 0-1<br>(0-08 – 0-12)  | 4<br>(2 – 7)                | 0<br>(0 – 0)                   |
| Kiribati                             | 12<br>(9 – 15)     | 6-55<br>(5-43 – 7-82)    | 56<br>(9 – 100)                      | 894<br>(702 – 1124)         | 0-07<br>(0-06 – 0-09) | 5<br>(4 – 6)                | 5<br>(3 – 8)                   |
| Marshall Islands                     | 35<br>(27 – 42)    | 7-12<br>(5-89 – 8-91)    | 32<br>(6 – 57)                       | 2591<br>(2096 – 3121)       | 0-07<br>(0-06 – 0-09) | 3<br>(2 – 4)                | 10<br>(6 – 13)                 |
| Northern Mariana Islands             | ..                 | 9-87<br>(8-18 – 12-47)   | 0<br>(0 – 0)                         | ..                          | 0-09<br>(0-07 – 0-11) | 3<br>(2 – 5)                | 0<br>(0 – 0)                   |
| Papua New Guinea                     | 8<br>(6 – 10)      | 5-68<br>(4-77 – 7-26)    | 7878<br>(896 – 12 049)               | 512<br>(419 – 626)          | 0-07<br>(0-06 – 0-09) | 389<br>(288 – 477)          | 268<br>(166 – 373)             |
| Samoa                                | 20<br>(16 – 25)    | 7-61<br>(6-31 – 9-23)    | 28<br>(-2 – 59)                      | 1475<br>(1184 – 1787)       | 0-08<br>(0-07 – 0-1)  | 8<br>(5 – 10)               | 12<br>(6 – 18)                 |

|                            |                    |                         |                                      |                             |                       |                             |                                |
|----------------------------|--------------------|-------------------------|--------------------------------------|-----------------------------|-----------------------|-----------------------------|--------------------------------|
| Solomon Islands            | 9<br>(7 – 11)      | 6-18<br>(5.07 – 7.34)   | 410<br>(98 – 680)                    | 693<br>(549 – 851)          | 0-07<br>(0-06 – 0-08) | 31<br>(25 – 37)             | 26<br>(17 – 36)                |
| Tonga                      | 16<br>(13 – 19)    | 8-09<br>(6.86 – 9.81)   | 17<br>(–2 – 35)                      | 1111<br>(915 – 1328)        | 0-09<br>(0-07 – 0-1)  | 4<br>(3 – 5)                | 5<br>(2 – 7)                   |
| Vanuatu                    | 10<br>(7 – 12)     | 6-37<br>(5.33 – 7.83)   | 154<br>(–9 – 260)                    | 641<br>(500 – 814)          | 0-08<br>(0-06 – 0-09) | 12<br>(8 – 15)              | 9<br>(5 – 14)                  |
| Southeast Asia             | ..                 | 5-73<br>(4.82 – 6.78)   | 726 606<br>(392 197 – 1 005 771)     | ..                          | 0-04<br>(0-03 – 0-05) | 44 326<br>(40 487 – 47 685) | 230 477<br>(176 187 – 288 696) |
| Cambodia                   | 19<br>(16 – 22)    | 5-1<br>(4.55 – 5.76)    | 18 984<br>(11 757 – 25 161)          | 2954<br>(2356 – 3614)       | 0-03<br>(0-02 – 0-03) | 1301<br>(1224 – 1373)       | 4219<br>(3279 – 5320)          |
| Indonesia                  | 38<br>(30 – 48)    | 5-83<br>(4.7 – 7.24)    | 218 232<br>(41 722 – 349 883)        | 3996<br>(3056 – 5086)       | 0-04<br>(0-03 – 0-05) | 15 566<br>(13 585 – 17 213) | 71 776<br>(49 815 – 96 876)    |
| Laos                       | 17<br>(14 – 21)    | 4-48<br>(3.74 – 5.3)    | 8440<br>(3889 – 12 155)              | 2485<br>(1989 – 3082)       | 0-02<br>(0-02 – 0-03) | 585<br>(547 – 622)          | 1614<br>(1239 – 2051)          |
| Malaysia                   | 53<br>(44 – 63)    | 12-69<br>(10.7 – 14.84) | 0<br>(0 – 0)                         | 11 232<br>(9156 – 13 672)   | 0-04<br>(0-04 – 0-05) | 1835<br>(1633 – 2020)       | 20 808<br>(15 136 – 27 397)    |
| Maldives                   | 174<br>(137 – 218) | 6-01<br>(5.04 – 7.11)   | 320<br>(66 – 534)                    | 20 651<br>(16 123 – 25 683) | 0-04<br>(0-03 – 0-04) | 25<br>(23 – 27)             | 581<br>(420 – 756)             |
| Mauritius                  | 87<br>(72 – 105)   | 6-78<br>(5.73 – 7.96)   | 577<br>(–202 – 1224)                 | 10 051<br>(8136 – 12 381)   | 0-04<br>(0-03 – 0-05) | 89<br>(80 – 98)             | 960<br>(691 – 1260)            |
| Myanmar                    | 26<br>(21 – 32)    | 5-73<br>(4.82 – 6.77)   | 48 508<br>(12 788 – 79 482)          | 4124<br>(3287 – 5176)       | 0-03<br>(0-02 – 0-03) | 4100<br>(3831 – 4343)       | 18 293<br>(13 745 – 23 713)    |
| Philippines                | 24<br>(20 – 29)    | 6-94<br>(5.83 – 8.1)    | 24 186<br>(–30160 – 68 276)          | 4731<br>(3826 – 5748)       | 0-03<br>(0-02 – 0-03) | 7853<br>(7338 – 8345)       | 37 888<br>(28 799 – 48 340)    |
| Sri Lanka                  | 28<br>(23 – 33)    | 6-38<br>(5.41 – 7.46)   | 12 851<br>(–276 – 24 820)            | 3268<br>(2639 – 3977)       | 0-04<br>(0-03 – 0-05) | 1488<br>(1338 – 1621)       | 5256<br>(3823 – 6786)          |
| Seychelles                 | 99<br>(81 – 120)   | 5-22<br>(4.5 – 5.95)    | 106<br>(51 – 158)                    | 9062<br>(7008 – 11 218)     | 0-04<br>(0-03 – 0-05) | 7<br>(6 – 7)                | 73<br>(54 – 94)                |
| Thailand                   | 85<br>(71 – 102)   | 3-7<br>(3.13 – 4.29)    | 175 152<br>(141 624 – 207 443)       | 5170<br>(4124 – 6381)       | 0-04<br>(0-04 – 0-05) | 4626<br>(4084 – 5097)       | 39 341<br>(29 999 – 49 447)    |
| Timor-Leste                | 7<br>(6 – 9)       | 6-53<br>(5.49 – 7.85)   | 484<br>(–228 – 1053)                 | 1114<br>(874 – 1424)        | 0-03<br>(0-03 – 0-04) | 86<br>(80 – 93)             | 101<br>(74 – 134)              |
| Vietnam                    | 41<br>(35 – 50)    | 3-77<br>(3.17 – 4.38)   | 218 766<br>(171 330 – 263 469)       | 2981<br>(2422 – 3641)       | 0-04<br>(0-03 – 0-05) | 6765<br>(6116 – 7321)       | 29 567<br>(22 860 – 36 602)    |
| Sub-Saharan Africa         | ..                 | 3-77<br>(3.22 – 4.42)   | 2 072 000<br>(1 474 034 – 2 572 415) | ..                          | 0-06<br>(0-05 – 0-07) | 64 634<br>(55 294 – 71 686) | 89 095<br>(67 313 – 110 054)   |
| Central sub-Saharan Africa | ..                 | 3-5<br>(2.92 – 4.23)    | 267 423<br>(181 603 – 336 363)       | ..                          | 0-07<br>(0-06 – 0-09) | 6694<br>(5014 – 8036)       | 3246<br>(2085 – 4413)          |
| Angola                     | 17<br>(13 – 21)    | 4-07<br>(3.36 – 4.76)   | 38 311<br>(22 153 – 53 485)          | 676<br>(529 – 864)          | 0-08<br>(0-06 – 0-09) | 1151<br>(771 – 1470)        | 1453<br>(864 – 2074)           |
| Central African Republic   | 2<br>(2 – 3)       | 2-87<br>(2.36 – 3.66)   | 19 579<br>(14 811 – 22 747)          | 87<br>(68 – 106)            | 0-06<br>(0-05 – 0-07) | 428<br>(348 – 497)          | 78<br>(57 – 100)               |
| Congo (Brazzaville)        | 13<br>(10 – 16)    | 4-88<br>(4.12 – 5.96)   | 6574<br>(2541 – 9301)                | 552<br>(437 – 683)          | 0-09<br>(0-08 – 0-11) | 171<br>(97 – 231)           | 185<br>(104 – 263)             |
| Congo                      | 3<br>(2 – 4)       | 3-26<br>(2.68 – 4.0)    | 200 863<br>(136 758 – 249 521)       | 128<br>(101 – 158)          | 0-07<br>(0-06 – 0-08) | 4875<br>(3657 – 5854)       | 1251<br>(848 – 1647)           |
| Equatorial Guinea          | 81<br>(64 – 105)   | 5-67<br>(4.75 – 6.85)   | 841<br>(78 – 1443)                   | 3478<br>(2649 – 4457)       | 0-1<br>(0-08 – 0-11)  | 27<br>(15 – 39)             | 169<br>(76 – 268)              |
| Gabon                      | 38<br>(30 – 46)    | 5-75<br>(4.79 – 7.02)   | 1255<br>(60 – 2065)                  | 1447<br>(1170 – 1784)       | 0-11<br>(0-09 – 0-13) | 41<br>(19 – 58)             | 110<br>(49 – 169)              |
| Eastern sub-Saharan Africa | ..                 | 4-28<br>(3.67 – 5.01)   | 646 310<br>(424 291 – 834 526)       | ..                          | 0-05<br>(0-05 – 0-06) | 27 691<br>(24 498 – 30 109) | 24 344<br>(18 542 – 29 807)    |
| Burundi                    | 2<br>(2 – 3)       | 5-98<br>(5.02 – 7.3)    | 4575<br>(–2314 – 10 459)             | 249<br>(199 – 308)          | 0-05<br>(0-04 – 0-06) | 883<br>(746 – 996)          | 234<br>(161 – 317)             |
| Comoros                    | 8<br>(6 – 9)       | 5-91<br>(4.89 – 7.38)   | 500<br>(63 – 854)                    | 265<br>(207 – 329)          | 0-15<br>(0-12 – 0-18) | 10<br>(3 – 15)              | 7<br>(3 – 11)                  |
| Djibouti                   | 10<br>(8 – 12)     | 4-89<br>(4.06 – 6.02)   | 723<br>(–31 – 1245)                  | 622<br>(497 – 754)          | 0-06<br>(0-05 – 0-08) | 39<br>(37 – 59)             | 39<br>(24 – 54)                |
| Eritrea                    | 2<br>(2 – 3)       | 5-08<br>(4.22 – 6.0)    | 5428<br>(2195 – 8501)                | 170<br>(131 – 216)          | 0-06<br>(0-05 – 0-08) | 292<br>(227 – 343)          | 64<br>(40 – 89)                |
| Ethiopia                   | 6<br>(5 – 8)       | 3-94<br>(3.28 – 4.61)   | 185 627<br>(124 019 – 239 930)       | 667<br>(531 – 851)          | 0-03<br>(0-03 – 0-04) | 8579<br>(7851 – 9196)       | 7004<br>(5146 – 8996)          |
| Kenya                      | 14<br>(11 – 16)    | 4-98<br>(4.24 – 5.94)   | 59 818<br>(25 628 – 85 627)          | 1048<br>(846 – 1245)        | 0-05<br>(0-04 – 0-06) | 3011<br>(2579 – 3350)       | 3997<br>(2811 – 5128)          |
| Madagascar                 | 5<br>(4 – 6)       | 4-19<br>(3.44 – 5.3)    | 36 344<br>(8892 – 53 499)            | 386<br>(308 – 490)          | 0-05<br>(0-04 – 0-06) | 1909<br>(1641 – 2134)       | 939<br>(640 – 1258)            |
| Malawi                     | 11<br>(10 – 14)    | 2-91<br>(2.39 – 3.48)   | 59 245<br>(47 953 – 69 838)          | 601<br>(489 – 710)          | 0-05<br>(0-04 – 0-06) | 1559<br>(1373 – 1713)       | 1630<br>(1247 – 2008)          |
| Mozambique                 | 6<br>(5 – 7)       | 3-53<br>(2.93 – 4.27)   | 77 725<br>(55 009 – 96 600)          | 386<br>(309 – 472)          | 0-04<br>(0-04 – 0-05) | 2657<br>(2333 – 2928)       | 1484<br>(1095 – 1876)          |
| Rwanda                     | 8<br>(7 – 8)       | 6-41<br>(5.86 – 7.0)    | 2931<br>(–492 – 6005)                | 1378<br>(1106 – 1718)       | 0-03<br>(0-02 – 0-04) | 1006<br>(922 – 1080)        | 1420<br>(1053 – 1853)          |
| Somalia                    | 3<br>(2 – 4)       | 4-21<br>(3.49 – 5.13)   | 21 131<br>(12 835 – 27 870)          | 202<br>(158 – 251)          | 0-05<br>(0-04 – 0-07) | 741<br>(622 – 840)          | 214<br>(150 – 279)             |
| South Sudan                | 9<br>(7 – 10)      | 2-81<br>(2.34 – 3.47)   | 37 869<br>(26 627 – 45 893)          | 439<br>(348 – 537)          | 0-04<br>(0-04 – 0-06) | 1249<br>(1064 – 1392)       | 880<br>(635 – 1115)            |
| Tanzania                   | 9<br>(8 – 11)      | 5-46<br>(4.54 – 6.56)   | 38 751<br>(117 – 68 702)             | 415<br>(328 – 515)          | 0-1<br>(0-08 – 0-12)  | 1677<br>(823 – 2266)        | 1086<br>(475 – 1617)           |
| Uganda                     | 11<br>(10 – 12)    | 4-17<br>(3.85 – 4.51)   | 64 696<br>(52 108 – 77 448)          | 780<br>(658 – 909)          | 0-05<br>(0-04 – 0-06) | 3072<br>(2756 – 3340)       | 3110<br>(2503 – 3749)          |
| Zambia                     | 26<br>(20 – 32)    | 2-97<br>(2.42 – 3.68)   | 50 948<br>(39 196 – 59 634)          | 904<br>(721 – 1103)         | 0-07<br>(0-06 – 0-08) | 998<br>(755 – 1193)         | 2236<br>(1576 – 2891)          |

|                             |                   |                       |                                  |                       |                       |                             |                             |
|-----------------------------|-------------------|-----------------------|----------------------------------|-----------------------|-----------------------|-----------------------------|-----------------------------|
| Southern sub-Saharan Africa | ..                | 3-32<br>(2-82 - 3-9)  | 259 084<br>(215 283 - 295 104)   | ..                    | 0-13<br>(0-1 - 0-16)  | 2040<br>(1337 - 2567)       | 27 629<br>(19 791 - 35 882) |
| Botswana                    | 109<br>(89 - 134) | 3-92<br>(3-27 - 4-69) | 5526<br>(3990 - 6819)            | 3777<br>(2935 - 4698) | 0-09<br>(0-07 - 0-1)  | 89<br>(54 - 118)            | 956<br>(618 - 1303)         |
| Lesotho                     | 28<br>(22 - 34)   | 2-42<br>(2-0 - 2-92)  | 12 204<br>(10 957 - 13 282)      | 974<br>(787 - 1203)   | 0-06<br>(0-05 - 0-07) | 206<br>(176 - 233)          | 545<br>(425 - 672)          |
| Namibia                     | 115<br>(93 - 139) | 3-57<br>(3-01 - 4-26) | 6385<br>(4896 - 7659)            | 2997<br>(2395 - 3697) | 0-1<br>(0-09 - 0-13)  | 66<br>(34 - 93)             | 947<br>(617 - 1267)         |
| South Africa                | 118<br>(98 - 140) | 3-53<br>(2-99 - 4-17) | 176 743<br>(144 847 - 203 084)   | 2060<br>(1513 - 2739) | 0-15<br>(0-12 - 0-2)  | 525<br>(27 - 872)           | 22 179<br>(15 571 - 29 558) |
| Swaziland (eSwatini)        | 80<br>(65 - 100)  | 2-93<br>(2-43 - 3-53) | 5048<br>(4243 - 5759)            | 5141<br>(4059 - 6549) | 0-04<br>(0-03 - 0-04) | 132<br>(121 - 142)          | 1096<br>(851 - 1378)        |
| Zimbabwe                    | 21<br>(17 - 25)   | 2-73<br>(2-28 - 3-31) | 53 178<br>(44 352 - 60 430)      | 769<br>(611 - 951)    | 0-06<br>(0-05 - 0-08) | 1022<br>(803 - 1193)        | 1907<br>(1398 - 2389)       |
| Western sub-Saharan Africa  | ..                | 3-49<br>(2-96 - 4-14) | 899 182<br>(643 002 - 1 116 079) | ..                    | 0-06<br>(0-05 - 0-07) | 28 210<br>(23 827 - 31 521) | 33 875<br>(24 832 - 42 419) |
| Benin                       | 7<br>(5 - 8)      | 3-71<br>(3-13 - 4-39) | 20 928<br>(13 087 - 27 541)      | 400<br>(320 - 481)    | 0-05<br>(0-04 - 0-06) | 811<br>(686 - 913)          | 466<br>(334 - 598)          |
| Burkina Faso                | 14<br>(12 - 17)   | 1-6<br>(1-32 - 1-89)  | 83 434<br>(77 019 - 89 755)      | 402<br>(325 - 499)    | 0-05<br>(0-04 - 0-06) | 1670<br>(1441 - 1858)       | 1859<br>(1497 - 2257)       |
| Cameroon                    | 11<br>(9 - 14)    | 4-07<br>(3-32 - 5-14) | 43 742<br>(20 566 - 59 451)      | 608<br>(489 - 735)    | 0-06<br>(0-05 - 0-07) | 1551<br>(1256 - 1810)       | 1463<br>(966 - 1943)        |
| Cape Verde                  | 24<br>(19 - 28)   | 6-16<br>(5-2 - 7-44)  | 196<br>(-222 - 484)              | 1360<br>(1090 - 1638) | 0-09<br>(0-07 - 0-1)  | 20<br>(12 - 25)             | 32<br>(15 - 49)             |
| Chad                        | 8<br>(7 - 10)     | 2-96<br>(2-47 - 3-79) | 40 594<br>(27 140 - 49 276)      | 525<br>(412 - 659)    | 0-04<br>(0-03 - 0-05) | 1397<br>(1237 - 1524)       | 1091<br>(791 - 1385)        |
| Cote d'Ivoire               | 14<br>(11 - 17)   | 3-92<br>(3-26 - 4-72) | 42 076<br>(24 036 - 56 909)      | 699<br>(571 - 862)    | 0-06<br>(0-05 - 0-08) | 1397<br>(1116 - 1648)       | 1587<br>(1065 - 2123)       |
| The Gambia                  | 7<br>(6 - 9)      | 5-31<br>(4-39 - 6-33) | 1180<br>(39 - 2194)              | 551<br>(438 - 669)    | 0-06<br>(0-05 - 0-07) | 118<br>(92 - 138)           | 75<br>(46 - 103)            |
| Ghana                       | 18<br>(16 - 20)   | 4-79<br>(4-38 - 5-18) | 34 030<br>(25 093 - 43 222)      | 1635<br>(1311 - 1954) | 0-04<br>(0-04 - 0-05) | 2062<br>(1858 - 2230)       | 3977<br>(3035 - 4935)       |
| Guinea                      | 5<br>(4 - 6)      | 3-45<br>(2-88 - 4-14) | 30 386<br>(21 216 - 38 023)      | 282<br>(226 - 344)    | 0-05<br>(0-04 - 0-06) | 999<br>(857 - 1117)         | 431<br>(314 - 546)          |
| Guinea-Bissau               | 8<br>(7 - 10)     | 3-65<br>(3-05 - 4-35) | 4171<br>(2852 - 5259)            | 460<br>(366 - 571)    | 0-06<br>(0-05 - 0-07) | 129<br>(105 - 149)          | 96<br>(68 - 124)            |
| Liberia                     | 13<br>(10 - 16)   | 3-58<br>(2-99 - 4-36) | 10 962<br>(7568 - 13 714)        | 736<br>(591 - 907)    | 0-06<br>(0-05 - 0-07) | 331<br>(273 - 379)          | 391<br>(277 - 505)          |
| Mali                        | 12<br>(10 - 14)   | 2-08<br>(1-84 - 2-33) | 72 214<br>(66 273 - 77 810)      | 680<br>(593 - 771)    | 0-03<br>(0-03 - 0-03) | 2081<br>(1985 - 2176)       | 2272<br>(1969 - 2575)       |
| Mauritania                  | 13<br>(10 - 16)   | 5-25<br>(4-36 - 6-39) | 4165<br>(1505 - 6481)            | 645<br>(514 - 791)    | 0-08<br>(0-07 - 0-1)  | 144<br>(90 - 187)           | 150<br>(90 - 213)           |
| Niger                       | 6<br>(5 - 7)      | 2-41<br>(1-97 - 3-0)  | 70 367<br>(55 784 - 81 752)      | 268<br>(211 - 327)    | 0-04<br>(0-04 - 0-05) | 1981<br>(1725 - 2176)       | 937<br>(703 - 1165)         |
| Nigeria                     | 19<br>(15 - 24)   | 3-54<br>(2-93 - 4-3)  | 401 807<br>(256 047 - 525 965)   | 830<br>(650 - 1023)   | 0-06<br>(0-05 - 0-08) | 11 451<br>(8912 - 13 477)   | 17 362<br>(11 607 - 23 177) |
| Sao Tome and Principe       | 17<br>(13 - 21)   | 4-94<br>(4-12 - 6-03) | 178<br>(29 - 284)                | 793<br>(631 - 977)    | 0-09<br>(0-07 - 0-11) | 7<br>(4 - 9)                | 9<br>(4 - 13)               |
| Senegal                     | 9<br>(8 - 11)     | 4-16<br>(3-51 - 4-94) | 22 971<br>(12 950 - 31 275)      | 664<br>(531 - 811)    | 0-05<br>(0-04 - 0-06) | 1048<br>(891 - 1165)        | 921<br>(673 - 1191)         |
| Sierra Leone                | 8<br>(6 - 9)      | 6-14<br>(5-1 - 7-57)  | 2385<br>(-2435 - 5885)           | 815<br>(639 - 1009)   | 0-05<br>(0-04 - 0-06) | 553<br>(474 - 613)          | 475<br>(323 - 632)          |
| Togo                        | 7<br>(6 - 8)      | 4-08<br>(3-43 - 4-93) | 13 394<br>(7537 - 18 041)        | 400<br>(325 - 493)    | 0-06<br>(0-05 - 0-07) | 460<br>(374 - 537)          | 283<br>(190 - 376)          |

**Table S21. Sensitivity analysis of national unit costs and expenditures required to achieve Universal Health Coverage standard for utilisation adjusting for quality and types of services in 2016 in 2017 international dollars**

Table displays four sets of national estimates organised by GBD region: 1) unit cost per outpatient visit increased by 28% and inpatient admission increased by 24% by country to reflect the cost of improved quality and types of services, 2) aggregate ratio of total outpatient visits and inpatient admissions to counterfactual DALYs, where the counterfactual DALYs standardised the burden of disease across countries by removing the effects of access and quality of health care, 3) estimates of additional services needed to achieve the UHC standard for utilisation calculated by age and sex category, and 4) total cost of additional services in 2017 international dollars including the cost of improve quality and types of services. The cost of scaling up to the UHC utilisation standard was done at the age-sex level, leading some countries to have a cost of UHC scale-up greater than zero despite their aggregate utilisation per counterfactual DALY being greater than the standard set by the Netherlands. For each result, the mean of 1,000 draws is reported, and in parenthesis the uncertainty interval defined as the 2.5<sup>th</sup> and 97.5<sup>th</sup> percentile of draws. DALY = disability-adjusted-life-year. GBD= Global Burden of Disease, UHC = Universal Health Coverage.

**Table S21: Sensitivity analysis of national unit costs and expenditures required to achieve Universal Health Coverage standard for utilisation adjusting for quality and types of services in 2016 in 2017 international dollars**

|                                                  | Outpatient visits                                      |                                                                             |                                                                                     | Inpatient admissions                                      |                                                                                |                                                                                        | Total additional cost to meet UHC standards in millions 2017 PPP \$ (95% UI) |
|--------------------------------------------------|--------------------------------------------------------|-----------------------------------------------------------------------------|-------------------------------------------------------------------------------------|-----------------------------------------------------------|--------------------------------------------------------------------------------|----------------------------------------------------------------------------------------|------------------------------------------------------------------------------|
|                                                  | Unit cost per outpatient visit in 2017 PPP \$ (95% UI) | Ratio of total outpatient visits to counterfactual DALYs (95% UI) (Table 1) | Additional outpatient visits to meet UHC standard (95% UI) (in thousands) (Table 1) | Unit cost per inpatient admission in 2017 PPP \$ (95% UI) | Ratio of total inpatient admissions to counterfactual DALYs (95% UI) (Table 1) | Additional inpatient admissions to meet UHC standard (95% UI) (in thousands) (Table 1) |                                                                              |
| Global                                           | ..                                                     | 6-7<br>(6.04 – 7.41)                                                        | 10 415 092<br>(7 809 849 – 12 742 483)                                              | ..                                                        | 0-12<br>(0-11 – 0-13)                                                          | 348 465<br>(306 581 – 383 242)                                                         | 1 474 808<br>(1 120 782 – 1 824 451)                                         |
| Low income                                       | ..                                                     | ..                                                                          | 1 956 058<br>(1 552 914 – 2 280 749)                                                | ..                                                        | ..                                                                             | 61 106<br>(54 415 – 66 067)                                                            | 59 034<br>(46 761 – 70 379)                                                  |
| Lower middle income                              | ..                                                     | ..                                                                          | 6 224 613<br>(4 643 059 – 7 683 756)                                                | ..                                                        | ..                                                                             | 214 966<br>(194 755 – 231 539)                                                         | 569 875<br>(457 324 – 689 135)                                               |
| Upper middle income                              | ..                                                     | ..                                                                          | 2 023 229<br>(1 418 055 – 2 614 556)                                                | ..                                                        | ..                                                                             | 59 265<br>(46 625 – 70 696)                                                            | 512 699<br>(394 128 – 626 702)                                               |
| High income                                      | ..                                                     | ..                                                                          | 211 192<br>(83 151 – 330 668)                                                       | ..                                                        | ..                                                                             | 13 128<br>(6499 – 18 933)                                                              | 333 200<br>(190 419 – 476 728)                                               |
| Central Europe, Eastern Europe, and Central Asia | ..                                                     | 10-82<br>(10.37 – 11.31)                                                    | 116 530<br>(86 387 – 145 714)                                                       | ..                                                        | 0-24<br>(0.23 – 0.25)                                                          | 4372<br>(2820 – 6017)                                                                  | 17 516<br>(13 237 – 22 049)                                                  |
| Central Asia                                     | ..                                                     | 8-25<br>(7.95 – 8.54)                                                       | 54 694<br>(48 267 – 61 347)                                                         | ..                                                        | 0-17<br>(0-17 – 0-18)                                                          | 1745<br>(1556 – 1936)                                                                  | 8267<br>(7307 – 9219)                                                        |
| Armenia                                          | 48<br>(40 – 57)                                        | 4-86<br>(4.67 – 5.05)                                                       | 5691<br>(5076 – 6307)                                                               | 1710<br>(1426 – 2019)                                     | 0-16<br>(0-16 – 0-17)                                                          | 63<br>(51 – 75)                                                                        | 489<br>(390 – 594)                                                           |
| Azerbaijan                                       | 62<br>(54 – 70)                                        | 5-8<br>(5.53 – 6.08)                                                        | 9910<br>(8076 – 11 755)                                                             | 4938<br>(4342 – 5613)                                     | 0-08<br>(0-08 – 0-09)                                                          | 581<br>(539 – 621)                                                                     | 4379<br>(3721 – 5087)                                                        |
| Georgia                                          | 31<br>(26 – 38)                                        | 7-13<br>(6.13 – 8.43)                                                       | 1736<br>(359 – 3125)                                                                | 2408<br>(2128 – 2720)                                     | 0-11<br>(0-1 – 0-11)                                                           | 209<br>(185 – 232)                                                                     | 702<br>(564 – 857)                                                           |
| Kazakhstan                                       | 39<br>(35 – 43)                                        | 8-27<br>(7.91 – 8.65)                                                       | 2937<br>(1224 – 4814)                                                               | 1872<br>(1699 – 2046)                                     | 0-19<br>(0-18 – 0-2)                                                           | 217<br>(163 – 277)                                                                     | 653<br>(476 – 867)                                                           |
| Kyrgyzstan                                       | 18<br>(16 – 20)                                        | 4-06<br>(3.91 – 4.22)                                                       | 14 137<br>(12 960 – 15 301)                                                         | 525<br>(472 – 595)                                        | 0-17<br>(0-17 – 0-18)                                                          | 83<br>(60 – 103)                                                                       | 375<br>(325 – 436)                                                           |
| Mongolia                                         | 22<br>(18 – 26)                                        | 6-39<br>(5.38 – 7.61)                                                       | 1669<br>(388 – 2868)                                                                | 907<br>(717 – 1126)                                       | 0-18<br>(0-15 – 0-22)                                                          | 32<br>(14 – 48)                                                                        | 85<br>(43 – 133)                                                             |
| Tajikistan                                       | 9<br>(8 – 10)                                          | 5-69<br>(5.44 – 5.96)                                                       | 8781<br>(7148 – 10 447)                                                             | 410<br>(368 – 459)                                        | 0-15<br>(0-15 – 0-16)                                                          | 162<br>(130 – 192)                                                                     | 181<br>(147 – 219)                                                           |
| Turkmenistan                                     | 78<br>(68 – 89)                                        | 4-81<br>(4.6 – 5.02)                                                        | 9620<br>(8440 – 10 757)                                                             | 2182<br>(1706 – 2668)                                     | 0-2<br>(0-16 – 0-24)                                                           | 44<br>(16 – 66)                                                                        | 1086<br>(888 – 1309)                                                         |
| Uzbekistan                                       | 10<br>(9 – 11)                                         | 11-85<br>(11.37 – 12.32)                                                    | 212<br>(-318 – 764)                                                                 | 717<br>(648 – 790)                                        | 0-21<br>(0-2 – 0-22)                                                           | 353<br>(275 – 431)                                                                     | 316<br>(239 – 396)                                                           |
| Central Europe                                   | ..                                                     | 10-21<br>(9.83 – 10.6)                                                      | 25 786<br>(19 317 – 32 104)                                                         | ..                                                        | 0-25<br>(0-23 – 0-27)                                                          | 737<br>(344 – 1109)                                                                    | 4516<br>(3001 – 6128)                                                        |
| Albania                                          | 36<br>(30 – 44)                                        | 6-98<br>(5.92 – 8.13)                                                       | 1189<br>(-163 – 2405)                                                               | 2546<br>(2275 – 2879)                                     | 0-12<br>(0-11 – 0-12)                                                          | 129<br>(110 – 147)                                                                     | 470<br>(351 – 591)                                                           |
| Bosnia and Herzegovina                           | 25<br>(21 – 29)                                        | 12-28<br>(10.83 – 14.43)                                                    | 0<br>(0 – 0)                                                                        | 2550<br>(2104 – 3087)                                     | 0-14<br>(0-12 – 0-16)                                                          | 115<br>(36 – 185)                                                                      | 378<br>(102 – 697)                                                           |
| Bulgaria                                         | 68<br>(63 – 74)                                        | 7-17<br>(6.7 – 7.63)                                                        | 3478<br>(1720 – 5113)                                                               | 1592<br>(1460 – 1728)                                     | 0-35<br>(0-33 – 0-37)                                                          | 0<br>(0 – 0)                                                                           | 306<br>(151 – 458)                                                           |
| Croatia                                          | 69<br>(63 – 76)                                        | 8-06<br>(7.74 – 8.42)                                                       | 965<br>(417 – 1483)                                                                 | 2753<br>(2489 – 3067)                                     | 0-23<br>(0-21 – 0-24)                                                          | 41<br>(18 – 64)                                                                        | 226<br>(109 – 348)                                                           |
| Czech Republic                                   | 64<br>(59 – 69)                                        | 14-1<br>(13.48 – 14.84)                                                     | 0<br>(0 – 0)                                                                        | 3035<br>(2546 – 3547)                                     | 0-32<br>(0-28 – 0-38)                                                          | 0<br>(0 – 0)                                                                           | 0<br>(0 – 0)                                                                 |
| Hungary                                          | 42<br>(38 – 45)                                        | 15-6<br>(15.03 – 16.24)                                                     | 0<br>(0 – 0)                                                                        | 2764<br>(2528 – 3013)                                     | 0-26<br>(0-24 – 0-28)                                                          | 24<br>(-35 – 81)                                                                       | 84<br>(-114 – 284)                                                           |
| Macedonia                                        | 33<br>(28 – 38)                                        | 8-32<br>(7.93 – 8.72)                                                       | 469<br>(321 – 613)                                                                  | 2081<br>(1800 – 2521)                                     | 0-15<br>(0-14 – 0-16)                                                          | 57<br>(38 – 74)                                                                        | 168<br>(108 – 233)                                                           |
| Montenegro                                       | 33<br>(30 – 36)                                        | 9-39<br>(8.79 – 9.95)                                                       | 20<br>(-21 – 60)                                                                    | 2264<br>(2067 – 2469)                                     | 0-16<br>(0-15 – 0-17)                                                          | 14<br>(10 – 17)                                                                        | 40<br>(27 – 52)                                                              |
| Poland                                           | 62<br>(57 – 67)                                        | 10-21<br>(9.78 – 10.63)                                                     | 0<br>(0 – 0)                                                                        | 2940<br>(2679 – 3219)                                     | 0-24<br>(0-22 – 0-25)                                                          | 77<br>(-95 – 246)                                                                      | 283<br>(-331 – 905)                                                          |
| Romania                                          | 58<br>(53 – 65)                                        | 6-11<br>(5.83 – 6.38)                                                       | 19 296<br>(15 002 – 23 587)                                                         | 1393<br>(1231 – 1568)                                     | 0-29<br>(0-27 – 0-32)                                                          | 10<br>(-60 – 74)                                                                       | 1470<br>(1063 – 1894)                                                        |
| Serbia                                           | 44<br>(40 – 48)                                        | 9-3<br>(8.93 – 9.65)                                                        | 368<br>(-307 – 987)                                                                 | 3155<br>(2844 – 3495)                                     | 0-15<br>(0-14 – 0-16)                                                          | 263<br>(204 – 320)                                                                     | 1057<br>(792 – 1354)                                                         |
| Slovakia                                         | 47<br>(43 – 52)                                        | 16-97<br>(16.28 – 17.65)                                                    | 0<br>(0 – 0)                                                                        | 3164<br>(2865 – 3499)                                     | 0-28<br>(0-26 – 0-29)                                                          | 5<br>(-6 – 15)                                                                         | 18<br>(-25 – 60)                                                             |
| Slovenia                                         | 100<br>(93 – 107)                                      | 9-87<br>(9.49 – 10.25)                                                      | 0<br>(0 – 0)                                                                        | 4347<br>(3986 – 4707)                                     | 0-25<br>(0-23 – 0-26)                                                          | 3<br>(-3 – 8)                                                                          | 15<br>(-14 – 46)                                                             |
| Eastern Europe                                   | ..                                                     | 12-12<br>(11.51 – 12.8)                                                     | 36 050<br>(12 837 – 57 240)                                                         | ..                                                        | 0-26<br>(0-25 – 0-27)                                                          | 1889<br>(666 – 3266)                                                                   | 4733<br>(1835 – 7930)                                                        |
| Belarus                                          | 23<br>(22 – 25)                                        | 14-85<br>(14.32 – 15.42)                                                    | 0<br>(0 – 0)                                                                        | 1348<br>(1122 – 1629)                                     | 0-29<br>(0-24 – 0-35)                                                          | 54<br>(-74 – 149)                                                                      | 92<br>(-125 – 266)                                                           |
| Estonia                                          | 66<br>(61 – 72)                                        | 10-29<br>(9.92 – 10.66)                                                     | 0<br>(0 – 0)                                                                        | 3052<br>(2793 – 3329)                                     | 0-24<br>(0-23 – 0-26)                                                          | 11<br>(5 – 17)                                                                         | 40<br>(18 – 64)                                                              |
| Latvia                                           | 62<br>(57 – 69)                                        | 8-75<br>(8.34 – 9.17)                                                       | 737<br>(485 – 985)                                                                  | 2578<br>(2346 – 2813)                                     | 0-24<br>(0-23 – 0-25)                                                          | 16<br>(6 – 27)                                                                         | 110<br>(61 – 162)                                                            |

|                           |                    |                          |                               |                             |                       |                           |                                |
|---------------------------|--------------------|--------------------------|-------------------------------|-----------------------------|-----------------------|---------------------------|--------------------------------|
| Lithuania                 | 53<br>(49 – 56)    | 12.3<br>(11.85 – 12.79)  | 0<br>(0 – 0)                  | 2186<br>(1984 – 2401)       | 0.33<br>(0.31 – 0.35) | 1<br>(-1 – 2)             | 2<br>(-2 – 6)                  |
| Moldova                   | 17<br>(15 – 19)    | 7.79<br>(7.48 – 8.11)    | 1723<br>(1241 – 2196)         | 855<br>(760 – 966)          | 0.2<br>(0.19 – 0.21)  | 70<br>(56 – 84)           | 112<br>(89 – 140)              |
| Russia                    | 33<br>(31 – 36)    | 13.75<br>(13.08 – 14.58) | 0<br>(0 – 0)                  | 1941<br>(1808 – 2089)       | 0.26<br>(0.25 – 0.27) | 1237<br>(248 – 2429)      | 2980<br>(583 – 5994)           |
| Ukraine                   | 22<br>(18 – 26)    | 7.02<br>(6.07 – 8.37)    | 33 590<br>(10 504 – 54 226)   | 694<br>(626 – 768)          | 0.26<br>(0.24 – 0.27) | 501<br>(143 – 896)        | 1396<br>(546 – 2353)           |
| High-income               | ..                 | 11.79<br>(10.78 – 12.88) | 249 199<br>(94 015 – 391 261) | ..                          | 0.2<br>(0.18 – 0.21)  | 12 493<br>(5931 – 18 151) | 315 274<br>(176 967 – 454 259) |
| Australasia               | ..                 | 11.79<br>(11.34 – 12.25) | 0<br>(0 – 0)                  | ..                          | 0.24<br>(0.22 – 0.26) | 45<br>(6 – 78)            | 370<br>(44 – 658)              |
| Australia                 | 154<br>(148 – 162) | 11.95<br>(11.49 – 12.43) | 0<br>(0 – 0)                  | 7334<br>(6669 – 8087)       | 0.24<br>(0.22 – 0.26) | 4<br>(-31 – 33)           | 39<br>(-255 – 308)             |
| New Zealand               | 132<br>(120 – 146) | 10.93<br>(10.16 – 11.63) | 0<br>(0 – 0)                  | 6479<br>(5973 – 7007)       | 0.21<br>(0.21 – 0.22) | 41<br>(28 – 55)           | 331<br>(214 – 439)             |
| High-income Asia-Pacific  | ..                 | 22.92<br>(20.6 – 24.92)  | 0<br>(0 – 0)                  | ..                          | 0.18<br>(0.16 – 0.21) | 3195<br>(626 – 5512)      | 42 636<br>(6966 – 83 024)      |
| Brunei                    | 68<br>(54 – 83)    | 15.62<br>(13.29 – 19.64) | 0<br>(0 – 0)                  | 5260<br>(4199 – 6551)       | 0.19<br>(0.15 – 0.22) | 3<br>(0 – 5)              | 19<br>(-3 – 40)                |
| Japan                     | 76<br>(67 – 88)    | 22.42<br>(19.46 – 24.99) | 0<br>(0 – 0)                  | 10 335<br>(8572 – 12 472)   | 0.16<br>(0.13 – 0.19) | 3169<br>(642 – 5453)      | 42 337<br>(6947 – 82 194)      |
| Singapore                 | 79<br>(65 – 95)    | 22.68<br>(19.12 – 27.38) | 0<br>(0 – 0)                  | 9132<br>(7516 – 11 044)     | 0.18<br>(0.15 – 0.21) | 23<br>(-22 – 60)          | 280<br>(-241 – 815)            |
| South Korea               | 50<br>(47 – 53)    | 24.33<br>(23.24 – 25.44) | 0<br>(0 – 0)                  | 4878<br>(4492 – 5261)       | 0.24<br>(0.23 – 0.26) | 0<br>(0 – 0)              | 0<br>(0 – 0)                   |
| High-income North America | ..                 | 8.79<br>(7.79 – 9.87)    | 119 433<br>(27 473 – 197 248) | ..                          | 0.17<br>(0.15 – 0.18) | 5014<br>(2949 – 6919)     | 209 303<br>(116 049 – 302 869) |
| Canada                    | 157<br>(148 – 167) | 12.99<br>(12.23 – 13.69) | 0<br>(0 – 0)                  | 10 103<br>(8448 – 12 088)   | 0.19<br>(0.16 – 0.23) | 302<br>(97 – 465)         | 3840<br>(762 – 6691)           |
| Greenland                 | ..                 | 8.7<br>(7.52 – 10.28)    | 15<br>(-4 – 29)               | ..                          | 0.15<br>(0.12 – 0.18) | 1<br>(1 – 1)              | 0<br>(0 – 0)                   |
| United States             | 478<br>(415 – 548) | 8.33<br>(7.25 – 9.52)    | 119 418<br>(27 474 – 197 217) | 22 543<br>(20 547 – 24 392) | 0.17<br>(0.15 – 0.18) | 4710<br>(2677 – 6590)     | 205 463<br>(113 585 – 298 052) |
| Southern Latin America    | ..                 | 5.92<br>(5.32 – 6.71)    | 77 103<br>(38 426 – 104 635)  | ..                          | 0.12<br>(0.1 – 0.14)  | 2402<br>(1510 – 3199)     | 26 085<br>(17 426 – 34 709)    |
| Argentina                 | 86<br>(71 – 101)   | 6.1<br>(5.28 – 7.18)     | 47 282<br>(12 243 – 72 301)   | 4211<br>(3507 – 5052)       | 0.12<br>(0.1 – 0.14)  | 1529<br>(822 – 2167)      | 13 559<br>(7240 – 20 294)      |
| Chile                     | 131<br>(125 – 138) | 5.48<br>(5.31 – 5.68)    | 26 005<br>(22 813 – 29 141)   | 5956<br>(5252 – 6721)       | 0.12<br>(0.11 – 0.14) | 618<br>(397 – 806)        | 9038<br>(6843 – 11 259)        |
| Uruguay                   | 118<br>(100 – 139) | 6.08<br>(5.29 – 7.06)    | 3816<br>(1301 – 5880)         | 9102<br>(7505 – 10 776)     | 0.08<br>(0.07 – 0.09) | 255<br>(216 – 288)        | 3488<br>(2435 – 4508)          |
| Western Europe            | ..                 | 10.65<br>(9.86 – 11.58)  | 52 663<br>(6711 – 97 539)     | ..                          | 0.24<br>(0.22 – 0.25) | 1837<br>(233 – 3139)      | 36 880<br>(13 048 – 62 021)    |
| Andorra                   | 367<br>(311 – 429) | 10.72<br>(9.35 – 12.3)   | 0<br>(0 – 0)                  | 15 054<br>(12 308 – 18 392) | 0.24<br>(0.2 – 0.29)  | 0<br>(0 – 0)              | 0<br>(0 – 0)                   |
| Austria                   | 187<br>(179 – 196) | 11.15<br>(10.71 – 11.61) | 29<br>(-257 – 308)            | 5357<br>(5044 – 5663)       | 0.37<br>(0.35 – 0.39) | 0<br>(0 – 0)              | 9<br>(-73 – 89)                |
| Belgium                   | 147<br>(131 – 162) | 13.54<br>(12.39 – 15.04) | 0<br>(0 – 0)                  | 7869<br>(7298 – 8435)       | 0.24<br>(0.22 – 0.26) | 5<br>(-15 – 22)           | 53<br>(-143 – 216)             |
| Cyprus                    | 110<br>(93 – 130)  | 8.51<br>(7.29 – 9.82)    | 246<br>(-39 – 524)            | 5938<br>(4956 – 7154)       | 0.15<br>(0.13 – 0.18) | 16<br>(-1 – 31)           | 159<br>(21 – 309)              |
| Denmark                   | 267<br>(256 – 281) | 7.82<br>(7.55 – 8.09)    | 885<br>(280 – 1498)           | 9136<br>(8556 – 9721)       | 0.22<br>(0.21 – 0.23) | 2<br>(-5 – 9)             | 319<br>(62 – 589)              |
| Finland                   | 229<br>(218 – 240) | 7.16<br>(6.84 – 7.47)    | 1777<br>(908 – 2645)          | 6627<br>(6175 – 7104)       | 0.24<br>(0.22 – 0.25) | 0<br>(-1 – 1)             | 533<br>(266 – 821)             |
| France                    | 170<br>(163 – 178) | 11.44<br>(11.01 – 11.89) | 0<br>(0 – 0)                  | 6576<br>(6049 – 7063)       | 0.28<br>(0.26 – 0.31) | 0<br>(0 – 0)              | 0<br>(0 – 0)                   |
| Germany                   | 159<br>(143 – 175) | 13.86<br>(12.63 – 15.39) | 0<br>(0 – 0)                  | 6050<br>(5674 – 6445)       | 0.34<br>(0.33 – 0.36) | 0<br>(0 – 0)              | 0<br>(0 – 0)                   |
| Greece                    | 122<br>(102 – 146) | 6.75<br>(5.79 – 7.93)    | 7123<br>(1258 – 12 279)       | 3176<br>(2623 – 3857)       | 0.25<br>(0.21 – 0.3)  | 0<br>(0 – 0)              | 1162<br>(169 – 2247)           |
| Iceland                   | 180<br>(171 – 193) | 10.14<br>(9.69 – 10.57)  | 0<br>(0 – 0)                  | 9402<br>(8699 – 10 124)     | 0.18<br>(0.17 – 0.2)  | 2<br>(1 – 3)              | 24<br>(11 – 37)                |
| Ireland                   | 170<br>(153 – 189) | 13.09<br>(12.21 – 13.88) | 0<br>(0 – 0)                  | 10 189<br>(9131 – 11 362)   | 0.21<br>(0.19 – 0.22) | 0<br>(-2 – 3)             | 5<br>(-31 – 39)                |
| Israel                    | 86<br>(73 – 99)    | 12.32<br>(10.77 – 14.4)  | 0<br>(0 – 0)                  | 4183<br>(3879 – 4499)       | 0.24<br>(0.23 – 0.26) | 0<br>(0 – 0)              | 0<br>(0 – 0)                   |
| Italy                     | 103<br>(91 – 115)  | 12.73<br>(11.46 – 14.42) | 0<br>(0 – 0)                  | 7259<br>(6625 – 7897)       | 0.17<br>(0.16 – 0.19) | 546<br>(-33 – 1077)       | 4993<br>(-157 – 10 319)        |
| Luxembourg                | 274<br>(253 – 299) | 10.79<br>(10.34 – 11.26) | 0<br>(0 – 0)                  | 12 262<br>(11 100 – 13 522) | 0.22<br>(0.21 – 0.24) | 0<br>(0 – 0)              | 0<br>(-1 – 1)                  |
| Malta                     | 76<br>(66 – 90)    | 18.82<br>(16.05 – 21.55) | 0<br>(0 – 0)                  | 7422<br>(6179 – 8997)       | 0.19<br>(0.15 – 0.23) | 1<br>(-3 – 4)             | 8<br>(-27 – 37)                |
| Netherlands               | 312<br>(282 – 343) | 7.25<br>(6.67 – 7.89)    | 0<br>(0 – 0)                  | 12 313<br>(10 701 – 14 114) | 0.17<br>(0.15 – 0.2)  | 0<br>(0 – 0)              | 0<br>(0 – 0)                   |
| Norway                    | 413<br>(388 – 438) | 7.21<br>(6.92 – 7.51)    | 1275<br>(374 – 2084)          | 10 060<br>(9375 – 10 820)   | 0.27<br>(0.26 – 0.29) | 0<br>(-2 – 3)             | 691<br>(268 – 1148)            |
| Portugal                  | 139<br>(128 – 155) | 7.01<br>(6.43 – 7.52)    | 4178<br>(1393 – 7291)         | 6610<br>(6121 – 7147)       | 0.14<br>(0.14 – 0.15) | 291<br>(215 – 372)        | 3158<br>(2209 – 4182)          |
| Spain                     | 124<br>(110 – 140) | 10.6<br>(9.45 – 11.9)    | 0<br>(0 – 0)                  | 8027<br>(7567 – 8480)       | 0.16<br>(0.15 – 0.17) | 602<br>(366 – 842)        | 6003<br>(3508 – 8687)          |



|                                     |                    |                          |                                |                             |                       |                             |                                |
|-------------------------------------|--------------------|--------------------------|--------------------------------|-----------------------------|-----------------------|-----------------------------|--------------------------------|
| Sweden                              | 402<br>(343 – 467) | 5-7<br>(4-87 – 6-63)     | 11 494<br>(4594 – 17 687)      | 11 249<br>(9420 – 13 328)   | 0-19<br>(0-16 – 0-23) | 61<br>(-91 – 179)           | 6976<br>(2295 – 11 868)        |
| Switzerland                         | 398<br>(369 – 428) | 7-88<br>(7-36 – 8-41)    | 2280<br>(458 – 3955)           | 12 421<br>(11 587 – 13 301) | 0-24<br>(0-22 – 0-25) | 0<br>(0 – 0)                | 1177<br>(253 – 2092)           |
| United Kingdom                      | 243<br>(210 – 284) | 7-01<br>(6-1 – 8-07)     | 23 375<br>(-7052 – 52 671)     | 9037<br>(7699 – 10 398)     | 0-18<br>(0-16 – 0-21) | 311<br>(-547 – 945)         | 11 610<br>(-2044 – 27 094)     |
| Latin America and Caribbean         | ..                 | 6-47<br>(5-79 – 7-22)    | 615 322<br>(410 489 – 803 049) | ..                          | 0-1<br>(0-09 – 0-11)  | 28 433<br>(23 133 – 32 514) | 201 383<br>(152 282 – 248 921) |
| Andean Latin America                | ..                 | 7-78<br>(6-65 – 9-5)     | 11 992<br>(-10962 – 30 524)    | ..                          | 0-1<br>(0-09 – 0-11)  | 2869<br>(2402 – 3267)       | 9773<br>(7049 – 12 430)        |
| Bolivia                             | 25<br>(19 – 30)    | 7-42<br>(6-21 – 9-26)    | 4481<br>(-1078 – 9010)         | 1576<br>(1264 – 1899)       | 0-1<br>(0-08 – 0-12)  | 542<br>(432 – 638)          | 1215<br>(783 – 1647)           |
| Ecuador                             | 54<br>(43 – 67)    | 7-86<br>(6-57 – 9-5)     | 2906<br>(-4405 – 8852)         | 3297<br>(2890 – 3777)       | 0-1<br>(0-1 – 0-11)   | 810<br>(759 – 863)          | 3549<br>(2807 – 4316)          |
| Peru                                | 38<br>(29 – 45)    | 7-86<br>(6-72 – 9-76)    | 4605<br>(-8218 – 15 468)       | 2499<br>(2011 – 3035)       | 0-09<br>(0-08 – 0-11) | 1518<br>(1145 – 1831)       | 5009<br>(3098 – 6982)          |
| Caribbean                           | ..                 | 4-26<br>(3-66 – 4-9)     | 113 711<br>(93 323 – 132 567)  | ..                          | 0-1<br>(0-08 – 0-11)  | 2427<br>(1909 – 2836)       | 15 563<br>(11 535 – 20 016)    |
| Antigua and Barbuda                 | 111<br>(92 – 136)  | 5-29<br>(4-47 – 6-18)    | 157<br>(99 – 209)              | 4667<br>(3697 – 5695)       | 0-1<br>(0-08 – 0-12)  | 4<br>(3 – 5)                | 48<br>(32 – 66)                |
| The Bahamas                         | 136<br>(112 – 167) | 6-13<br>(5-18 – 7-21)    | 423<br>(194 – 609)             | 4931<br>(3892 – 6170)       | 0-13<br>(0-11 – 0-16) | 12<br>(8 – 16)              | 153<br>(86 – 216)              |
| Barbados                            | 164<br>(137 – 197) | 3-34<br>(2-85 – 3-86)    | 887<br>(770 – 997)             | 2790<br>(2236 – 3425)       | 0-15<br>(0-13 – 0-18) | 6<br>(2 – 10)               | 211<br>(154 – 272)             |
| Belize                              | 55<br>(44 – 67)    | 3-81<br>(3-19 – 4-5)     | 996<br>(784 – 1183)            | 2368<br>(1883 – 2884)       | 0-07<br>(0-06 – 0-09) | 25<br>(20 – 28)             | 143<br>(104 – 182)             |
| Bermuda                             | ..                 | 5-96<br>(5-06 – 6-97)    | 88<br>(49 – 124)               | ..                          | 0-13<br>(0-11 – 0-15) | 2<br>(1 – 3)                | 0<br>(0 – 0)                   |
| Cuba                                | 90<br>(72 – 113)   | 4-29<br>(3-65 – 4-91)    | 27 201<br>(21 141 – 33 629)    | 2760<br>(2160 – 3595)       | 0-11<br>(0-09 – 0-13) | 527<br>(327 – 704)          | 5049<br>(3345 – 7074)          |
| Dominica                            | 33<br>(27 – 40)    | 7-58<br>(6-41 – 8-85)    | 54<br>(22 – 86)                | 1995<br>(1587 – 2447)       | 0-1<br>(0-09 – 0-12)  | 4<br>(3 – 5)                | 12<br>(7 – 17)                 |
| Dominican Republic                  | 92<br>(77 – 112)   | 4-5<br>(3-84 – 5-26)     | 24 490<br>(18 527 – 29 940)    | 2760<br>(2180 – 3365)       | 0-12<br>(0-1 – 0-14)  | 388<br>(255 – 494)          | 4300<br>(2908 – 5829)          |
| Grenada                             | 66<br>(54 – 81)    | 4-55<br>(3-88 – 5-35)    | 248<br>(185 – 303)             | 2435<br>(1949 – 2959)       | 0-1<br>(0-08 – 0-12)  | 6<br>(4 – 7)                | 39<br>(27 – 52)                |
| Guyana                              | 20<br>(16 – 25)    | 6-09<br>(5-08 – 7-13)    | 1012<br>(517 – 1479)           | 1796<br>(1393 – 2278)       | 0-06<br>(0-05 – 0-07) | 62<br>(55 – 68)             | 166<br>(115 – 220)             |
| Haiti                               | 14<br>(11 – 17)    | 2-95<br>(2-46 – 3-44)    | 40 783<br>(35 773 – 45 780)    | 558<br>(447 – 679)          | 0-07<br>(0-06 – 0-08) | 882<br>(747 – 981)          | 1343<br>(1033 – 1673)          |
| Jamaica                             | 72<br>(59 – 87)    | 2-75<br>(2-34 – 3-18)    | 10 051<br>(9014 – 11 074)      | 4186<br>(3349 – 5145)       | 0-04<br>(0-03 – 0-05) | 281<br>(261 – 300)          | 2410<br>(1948 – 2909)          |
| Puerto Rico                         | ..                 | 8-71<br>(7-46 – 10-12)   | 1528<br>(-178 – 2836)          | ..                          | 0-12<br>(0-1 – 0-14)  | 153<br>(96 – 202)           | 0<br>(0 – 0)                   |
| Saint Lucia                         | 53<br>(43 – 64)    | 5-98<br>(5-08 – 6-96)    | 265<br>(153 – 368)             | 2565<br>(2036 – 3158)       | 0-1<br>(0-08 – 0-12)  | 9<br>(7 – 12)               | 49<br>(32 – 66)                |
| Saint Vincent and the<br>Grenadines | 49<br>(41 – 60)    | 4-24<br>(3-62 – 4-96)    | 275<br>(212 – 329)             | 1799<br>(1457 – 2211)       | 0-09<br>(0-08 – 0-11) | 6<br>(5 – 8)                | 32<br>(22 – 42)                |
| Suriname                            | 83<br>(68 – 101)   | 4-49<br>(3-81 – 5-21)    | 1226<br>(918 – 1518)           | 3128<br>(2467 – 3886)       | 0-09<br>(0-08 – 0-11) | 29<br>(20 – 35)             | 244<br>(168 – 324)             |
| Trinidad and Tobago                 | 239<br>(197 – 288) | 3-73<br>(3-18 – 4-36)    | 3899<br>(3215 – 4531)          | 4557<br>(3604 – 5575)       | 0-15<br>(0-12 – 0-18) | 27<br>(10 – 40)             | 1363<br>(956 – 1814)           |
| Virgin Islands U.S.                 | ..                 | 5-98<br>(5-03 – 7-05)    | 127<br>(60 – 184)              | ..                          | 0-14<br>(0-11 – 0-16) | 4<br>(2 – 6)                | 0<br>(0 – 0)                   |
| Central Latin America               | ..                 | 5-94<br>(5-09 – 6-85)    | 380 121<br>(252 615 – 495 549) | ..                          | 0-08<br>(0-07 – 0-09) | 16 581<br>(14 173 – 18 455) | 131 340<br>(102 038 – 160 558) |
| Colombia                            | 41<br>(34 – 50)    | 8-86<br>(7-54 – 10-35)   | 6139<br>(-14333 – 25 382)      | 5897<br>(5084 – 6673)       | 0-05<br>(0-05 – 0-05) | 4122<br>(3892 – 4313)       | 30 549<br>(25 295 – 35 106)    |
| Costa Rica                          | 136<br>(111 – 166) | 4-38<br>(3-71 – 5-15)    | 11 198<br>(8563 – 13 699)      | 6305<br>(5007 – 7685)       | 0-07<br>(0-06 – 0-09) | 316<br>(258 – 359)          | 4471<br>(3270 – 5722)          |
| El Salvador                         | 88<br>(78 – 100)   | 2-61<br>(2-38 – 2-82)    | 24 501<br>(23 066 – 25 961)    | 6919<br>(5851 – 8226)       | 0-03<br>(0-02 – 0-03) | 672<br>(646 – 698)          | 8560<br>(7348 – 9832)          |
| Guatemala                           | 32<br>(25 – 39)    | 5-98<br>(4-97 – 7-24)    | 18 928<br>(2626 – 31 078)      | 2220<br>(1764 – 2695)       | 0-07<br>(0-06 – 0-08) | 1141<br>(944 – 1303)        | 3954<br>(2706 – 5330)          |
| Honduras                            | 26<br>(21 – 32)    | 5-59<br>(4-63 – 6-59)    | 13 067<br>(6947 – 18 450)      | 1696<br>(1311 – 2134)       | 0-07<br>(0-06 – 0-09) | 567<br>(456 – 657)          | 1650<br>(1084 – 2212)          |
| Mexico                              | 95<br>(80 – 112)   | 4-99<br>(4-29 – 5-77)    | 236 409<br>(160 140 – 305 056) | 4577<br>(3592 – 5576)       | 0-08<br>(0-07 – 0-1)  | 7645<br>(5842 – 8954)       | 73 106<br>(51 184 – 95 345)    |
| Nicaragua                           | 19<br>(16 – 24)    | 8-49<br>(7-13 – 9-97)    | 612<br>(-2376 – 2991)          | 1907<br>(1511 – 2342)       | 0-07<br>(0-06 – 0-09) | 410<br>(336 – 468)          | 992<br>(642 – 1347)            |
| Panama                              | 54<br>(44 – 65)    | 13-79<br>(11-76 – 15-98) | 0<br>(0 – 0)                   | 4095<br>(3338 – 5056)       | 0-14<br>(0-12 – 0-16) | 72<br>(18 – 112)            | 375<br>(91 – 695)              |
| Venezuela                           | 46<br>(37 – 58)    | 4-8<br>(4-01 – 5-65)     | 69 267<br>(52 395 – 84 376)    | 1717<br>(1376 – 2124)       | 0-1<br>(0-08 – 0-12)  | 1637<br>(1408 – 1841)       | 7682<br>(5659 – 9985)          |
| Tropical Latin America              | ..                 | 7-27<br>(6-79 – 7-79)    | 109 498<br>(63 846 – 156 000)  | ..                          | 0-12<br>(0-11 – 0-14) | 6556<br>(4321 – 8378)       | 44 708<br>(28 670 – 60 373)    |
| Brazil                              | 87<br>(77 – 97)    | 7-33<br>(6-85 – 7-85)    | 98 890<br>(56 314 – 140 448)   | 4054<br>(3403 – 4761)       | 0-12<br>(0-11 – 0-14) | 6167<br>(3989 – 7942)       | 42 435<br>(26 910 – 57 578)    |
| Paraguay                            | 58<br>(47 – 71)    | 5-51<br>(4-68 – 6-51)    | 10 607<br>(5839 – 14 711)      | 3009<br>(2402 – 3707)       | 0-09<br>(0-07 – 0-1)  | 389<br>(304 – 455)          | 2273<br>(1543 – 3032)          |
| North Africa and Middle East        | ..                 | 7-13<br>(6-31 – 8-23)    | 676 422<br>(469 769 – 838 873) | ..                          | 0-12<br>(0-11 – 0-14) | 23 918<br>(17 677 – 28 552) | 148 985<br>(98 870 – 196 722)  |

|                                      |                    |                          |                                      |                             |                       |                                |                                |
|--------------------------------------|--------------------|--------------------------|--------------------------------------|-----------------------------|-----------------------|--------------------------------|--------------------------------|
| Afghanistan                          | 6<br>(5 – 8)       | 5-61<br>(4-67 – 6-9)     | 63 000<br>(28 873 – 87 927)          | 599<br>(457 – 769)          | 0-08<br>(0-07 – 0-1)  | 2490<br>(1879 – 2993)          | 2410<br>(1528 – 3342)          |
| Algeria                              | 70<br>(57 – 85)    | 5-61<br>(4-74 – 6-66)    | 47 746<br>(26 082 – 66 884)          | 3787<br>(2864 – 4793)       | 0-12<br>(0-1 – 0-16)  | 1108<br>(502 – 1609)           | 9789<br>(5124 – 14 669)        |
| Bahrain                              | 103<br>(79 – 127)  | 10-69<br>(8-81 – 13-26)  | 9<br>(-11 – 27)                      | 20 526<br>(15 697 – 25 631) | 0-06<br>(0-05 – 0-07) | 87<br>(72 – 98)                | 2243<br>(1406 – 3031)          |
| Egypt                                | 18<br>(14 – 21)    | 9-29<br>(7-89 – 11-49)   | 1275<br>(-4466 – 6068)               | 1087<br>(860 – 1345)        | 0-18<br>(0-15 – 0-21) | 1492<br>(553 – 2250)           | 2105<br>(660 – 3562)           |
| Iran                                 | 67<br>(54 – 81)    | 7-23<br>(6-21 – 8-57)    | 21 686<br>(-20514 – 53 980)          | 7217<br>(5582 – 9069)       | 0-08<br>(0-07 – 0-1)  | 4995<br>(3755 – 5906)          | 47 357<br>(27 852 – 67 283)    |
| Iraq                                 | 74<br>(58 – 94)    | 2-33<br>(1-94 – 2-77)    | 159 645<br>(142 270 – 174 339)       | 2387<br>(1762 – 3169)       | 0-09<br>(0-07 – 0-11) | 2264<br>(1420 – 2905)          | 22 178<br>(15 909 – 28 796)    |
| Jordan                               | 54<br>(43 – 67)    | 4-73<br>(3-97 – 5-69)    | 15 825<br>(9757 – 20 581)            | 1240<br>(962 – 1571)        | 0-25<br>(0-2 – 0-3)   | 28<br>(11 – 43)                | 1159<br>(593 – 1759)           |
| Kuwait                               | 149<br>(117 – 183) | 8-64<br>(7-24 – 10-59)   | 217<br>(-427 – 747)                  | 10 690<br>(7952 – 14 003)   | 0-13<br>(0-1 – 0-16)  | 69<br>(22 – 108)               | 1005<br>(255 – 1871)           |
| Lebanon                              | 85<br>(67 – 105)   | 5-16<br>(4-34 – 6-15)    | 12 180<br>(7591 – 15 958)            | 5140<br>(4048 – 6350)       | 0-1<br>(0-08 – 0-12)  | 315<br>(228 – 388)             | 3392<br>(2250 – 4542)          |
| Libya                                | 31<br>(24 – 39)    | 7-93<br>(6-81 – 9-44)    | 1932<br>(-1693 – 4475)               | 2182<br>(1628 – 2884)       | 0-13<br>(0-11 – 0-16) | 158<br>(64 – 240)              | 532<br>(177 – 935)             |
| Morocco                              | 34<br>(27 – 42)    | 4-78<br>(3-97 – 5-83)    | 77 838<br>(52 509 – 97 910)          | 3715<br>(2898 – 4670)       | 0-05<br>(0-04 – 0-07) | 2867<br>(2547 – 3136)          | 16 808<br>(12 491 – 21 569)    |
| Oman                                 | 80<br>(62 – 101)   | 9-14<br>(7-59 – 11-27)   | 19<br>(-75 – 104)                    | 14 217<br>(10 795 – 18 105) | 0-06<br>(0-05 – 0-07) | 300<br>(250 – 339)             | 5361<br>(3375 – 7533)          |
| Palestine                            | 12<br>(10 – 15)    | 5-21<br>(4-37 – 6-19)    | 4803<br>(896 – 8395)                 | 964<br>(721 – 1298)         | 0-08<br>(0-07 – 0-11) | 278<br>(170 – 361)             | 420<br>(209 – 655)             |
| Qatar                                | 118<br>(89 – 151)  | 14-61<br>(11-97 – 17-89) | 0<br>(0 – 0)                         | 13 771<br>(9948 – 18 967)   | 0-13<br>(0-1 – 0-17)  | 29<br>(5 – 47)                 | 535<br>(88 – 1034)             |
| Saudi Arabia                         | 134<br>(110 – 161) | 10-55<br>(9-09 – 12-28)  | 637<br>(-1938 – 3394)                | 13 062<br>(10 279 – 16 358) | 0-12<br>(0-1 – 0-14)  | 802<br>(437 – 1111)            | 13 432<br>(6028 – 21 525)      |
| Sudan                                | 15<br>(12 – 20)    | 5-5<br>(4-62 – 6-7)      | 73 204<br>(34 725 – 101 941)         | 1197<br>(898 – 1595)        | 0-09<br>(0-07 – 0-11) | 2331<br>(1590 – 2886)          | 5022<br>(2977 – 7257)          |
| Syria                                | 14<br>(11 – 17)    | 5-06<br>(4-27 – 6-03)    | 61 729<br>(46 076 – 74 829)          | 673<br>(521 – 866)          | 0-13<br>(0-1 – 0-15)  | 846<br>(486 – 1160)            | 1814<br>(1141 – 2515)          |
| Tunisia                              | 40<br>(32 – 48)    | 7-28<br>(6-22 – 8-71)    | 3098<br>(-1641 – 7151)               | 3401<br>(2684 – 4247)       | 0-1<br>(0-09 – 0-12)  | 516<br>(360 – 649)             | 2399<br>(1409 – 3571)          |
| Turkey                               | 34<br>(30 – 39)    | 12-18<br>(11-65 – 12-72) | 0<br>(0 – 0)                         | 2190<br>(1886 – 2518)       | 0-22<br>(0-21 – 0-23) | 358<br>(213 – 499)             | 980<br>(551 – 1423)            |
| United Arab Emirates                 | 137<br>(104 – 173) | 8-49<br>(6-81 – 10-95)   | 402<br>(-827 – 1492)                 | 13 130<br>(10 010 – 16 708) | 0-09<br>(0-08 – 0-12) | 272<br>(124 – 384)             | 4672<br>(1681 – 7953)          |
| Yemen                                | 18<br>(14 – 23)    | 2-5<br>(2-22 – 2-81)     | 131 176<br>(121 549 – 140 001)       | 804<br>(581 – 1108)         | 0-07<br>(0-06 – 0-09) | 2312<br>(1786 – 2718)          | 5373<br>(4057 – 7092)          |
| South Asia                           | ..                 | 4-67<br>(3-93 – 5-48)    | 4 027 525<br>(3 113 082 – 4 896 398) | ..                          | 0-07<br>(0-06 – 0-08) | 120 653<br>(108 685 – 130 918) | 182 221<br>(142 748 – 223 356) |
| Bangladesh                           | 5<br>(4 – 6)       | 4-39<br>(3-69 – 5-18)    | 422 808<br>(323 953 – 514 241)       | 326<br>(257 – 410)          | 0-07<br>(0-06 – 0-08) | 12 253<br>(10 232 – 13 694)    | 7683<br>(5583 – 9776)          |
| Bhutan                               | 14<br>(11 – 17)    | 5-91<br>(5-0 – 6-92)     | 1100<br>(605 – 1507)                 | 842<br>(667 – 1078)         | 0-1<br>(0-08 – 0-12)  | 36<br>(24 – 45)                | 59<br>(36 – 82)                |
| India                                | 14<br>(11 – 17)    | 4-59<br>(3-82 – 5-4)     | 3 217 963<br>(2 493 450 – 3 913 540) | 875<br>(731 – 1048)         | 0-07<br>(0-07 – 0-08) | 92 448<br>(84 033 – 100 097)   | 159 993<br>(125 772 – 196 196) |
| Nepal                                | 13<br>(11 – 16)    | 2-65<br>(2-24 – 3-07)    | 113 559<br>(102 332 – 124 285)       | 518<br>(411 – 660)          | 0-07<br>(0-06 – 0-08) | 2207<br>(1843 – 2507)          | 3328<br>(2606 – 4151)          |
| Pakistan                             | 6<br>(5 – 7)       | 5-76<br>(4-89 – 6-74)    | 272 095<br>(150 396 – 379 250)       | 525<br>(399 – 667)          | 0-07<br>(0-06 – 0-08) | 13 709<br>(11 176 – 15 491)    | 11 158<br>(7731 – 14 809)      |
| Southeast Asia East Asia and Oceania | ..                 | 6-69<br>(6-11 – 7-29)    | 1 709 453<br>(1 060 336 – 2 339 121) | ..                          | 0-14<br>(0-13 – 0-15) | 71 154<br>(62 987 – 78 765)    | 457 716<br>(359 683 – 562 325) |
| East Asia                            | ..                 | 7-1<br>(6-6 – 7-59)      | 753 139<br>(400 129 – 1 114 796)     | ..                          | 0-18<br>(0-17 – 0-2)  | 12 175<br>(6354 – 17 677)      | 83 136<br>(50 065 – 118 027)   |
| China                                | 59<br>(54 – 65)    | 6-73<br>(6-28 – 7-17)    | 751 600<br>(401 537 – 1 113 190)     | 1609<br>(1448 – 1790)       | 0-18<br>(0-17 – 0-2)  | 11 360<br>(5698 – 16 459)      | 81 153<br>(49 400 – 115 644)   |
| North Korea                          | 5<br>(4 – 6)       | 7-98<br>(6-79 – 9-38)    | 1539<br>(-7288 – 7371)               | 247<br>(200 – 300)          | 0-14<br>(0-12 – 0-16) | 579<br>(159 – 927)             | 195<br>(39 – 356)              |
| Taiwan                               | 45<br>(37 – 55)    | 31-05<br>(26-72 – 36-07) | 0<br>(0 – 0)                         | 5845<br>(4615 – 7279)       | 0-17<br>(0-14 – 0-2)  | 236<br>(-13 – 443)             | 1788<br>(-23 – 3806)           |
| Oceania                              | ..                 | 6-17<br>(5-19 – 7-76)    | 13 061<br>(2801 – 19 123)            | ..                          | 0-07<br>(0-06 – 0-09) | 752<br>(620 – 860)             | 746<br>(505 – 967)             |
| American Samoa                       | ..                 | 9-87<br>(8-28 – 11-83)   | 2<br>(-2 – 6)                        | ..                          | 0-09<br>(0-08 – 0-11) | 4<br>(3 – 5)                   | 0<br>(0 – 0)                   |
| Federated States of Micronesia       | 16<br>(13 – 19)    | 8-2<br>(6-88 – 9-65)     | 40<br>(-18 – 102)                    | 1153<br>(931 – 1393)        | 0-09<br>(0-07 – 0-11) | 6<br>(5 – 7)                   | 10<br>(6 – 13)                 |
| Fiji                                 | 19<br>(15 – 23)    | 8-78<br>(7-32 – 10-99)   | 233<br>(-83 – 516)                   | 1509<br>(1208 – 1794)       | 0-08<br>(0-07 – 0-1)  | 58<br>(47 – 67)                | 116<br>(74 – 156)              |
| Guam                                 | ..                 | 10-14<br>(8-73 – 11-96)  | 3<br>(-8 – 12)                       | ..                          | 0-1<br>(0-08 – 0-12)  | 8<br>(6 – 11)                  | 0<br>(0 – 0)                   |
| Kiribati                             | 12<br>(9 – 15)     | 6-55<br>(5-43 – 7-82)    | 88<br>(11 – 160)                     | 894<br>(702 – 1124)         | 0-07<br>(0-06 – 0-09) | 8<br>(6 – 9)                   | 10<br>(7 – 14)                 |
| Marshall Islands                     | 35<br>(27 – 42)    | 7-12<br>(5-89 – 8-91)    | 41<br>(-9 – 81)                      | 2591<br>(2096 – 3121)       | 0-07<br>(0-06 – 0-09) | 5<br>(4 – 6)                   | 18<br>(11 – 24)                |
| Northern Mariana Islands             | ..                 | 9-87<br>(8-18 – 12-47)   | 0<br>(-1 – 1)                        | ..                          | 0-09<br>(0-07 – 0-11) | 6<br>(4 – 7)                   | 0<br>(0 – 0)                   |
| Papua New Guinea                     | 8<br>(6 – 10)      | 5-68<br>(4-77 – 7-26)    | 11 686<br>(2535 – 16 966)            | 512<br>(419 – 626)          | 0-07<br>(0-06 – 0-09) | 576<br>(474 – 664)             | 496<br>(328 – 660)             |

|                                  |                    |                         |                                      |                             |                       |                             |                                |
|----------------------------------|--------------------|-------------------------|--------------------------------------|-----------------------------|-----------------------|-----------------------------|--------------------------------|
| Samoa                            | 20<br>(16 – 25)    | 7.61<br>(6.31 – 9.23)   | 50<br>(-36 – 134)                    | 1475<br>(1184 – 1787)       | 0.08<br>(0.07 – 0.1)  | 12<br>(9 – 14)              | 23<br>(14 – 33)                |
| Solomon Islands                  | 9<br>(7 – 11)      | 6.18<br>(5.07 – 7.34)   | 652<br>(261 – 1022)                  | 693<br>(549 – 851)          | 0.07<br>(0.06 – 0.08) | 45<br>(38 – 51)             | 47<br>(32 – 63)                |
| Tonga                            | 16<br>(13 – 19)    | 8.09<br>(6.86 – 9.81)   | 22<br>(-32 – 63)                     | 1111<br>(915 – 1328)        | 0.09<br>(0.07 – 0.1)  | 6<br>(5 – 7)                | 9<br>(6 – 13)                  |
| Vanuatu                          | 10<br>(7 – 12)     | 6.37<br>(5.33 – 7.83)   | 244<br>(-5 – 403)                    | 641<br>(500 – 814)          | 0.08<br>(0.06 – 0.09) | 18<br>(14 – 21)             | 18<br>(11 – 25)                |
| Southeast Asia                   | ..                 | 5.73<br>(4.82 – 6.78)   | 943 254<br>(591 879 – 1 254 765)     | ..                          | 0.04<br>(0.03 – 0.05) | 58 227<br>(54 094 – 61 475) | 373 834<br>(291 350 – 461 503) |
| Cambodia                         | 19<br>(16 – 22)    | 5.1<br>(4.55 – 5.76)    | 27 443<br>(19 330 – 34 554)          | 2954<br>(2356 – 3614)       | 0.03<br>(0.02 – 0.03) | 1640<br>(1554 – 1723)       | 6705<br>(5282 – 8398)          |
| Indonesia                        | 38<br>(30 – 48)    | 5.83<br>(4.7 – 7.24)    | 295 299<br>(93 244 – 446 300)        | 3996<br>(3056 – 5086)       | 0.04<br>(0.03 – 0.05) | 20 694<br>(18 605 – 22 305) | 118 920<br>(85 727 – 158 392)  |
| Laos                             | 17<br>(14 – 21)    | 4.48<br>(3.74 – 5.3)    | 12 330<br>(7785 – 16 551)            | 2485<br>(1989 – 3082)       | 0.02<br>(0.02 – 0.03) | 728<br>(689 – 768)          | 2536<br>(1987 – 3183)          |
| Malaysia                         | 53<br>(44 – 63)    | 12.69<br>(10.7 – 14.84) | 0<br>(0 – 0)                         | 11 232<br>(9156 – 13 672)   | 0.04<br>(0.04 – 0.05) | 2447<br>(2230 – 2638)       | 34 399<br>(25 713 – 44 327)    |
| Maldives                         | 174<br>(137 – 218) | 6.01<br>(5.04 – 7.11)   | 459<br>(192 – 687)                   | 20 651<br>(16 123 – 25 683) | 0.04<br>(0.03 – 0.04) | 33<br>(31 – 35)             | 954<br>(701 – 1226)            |
| Mauritius                        | 87<br>(72 – 105)   | 6.78<br>(5.73 – 7.96)   | 851<br>(-14 – 1571)                  | 10 051<br>(8136 – 12 381)   | 0.04<br>(0.03 – 0.05) | 121<br>(111 – 129)          | 1611<br>(1201 – 2082)          |
| Myanmar                          | 26<br>(21 – 32)    | 5.73<br>(4.82 – 6.77)   | 69 602<br>(33 044 – 101 798)         | 4124<br>(3287 – 5176)       | 0.03<br>(0.02 – 0.03) | 5260<br>(4990 – 5521)       | 29 417<br>(22 526 – 37 712)    |
| Philippines                      | 24<br>(20 – 29)    | 6.94<br>(5.83 – 8.1)    | 61 728<br>(-3412 – 114 239)          | 4731<br>(3826 – 5748)       | 0.03<br>(0.02 – 0.03) | 10 025<br>(9471 – 10 537)   | 60 860<br>(46 878 – 76 519)    |
| Sri Lanka                        | 28<br>(23 – 33)    | 6.38<br>(5.41 – 7.46)   | 19 598<br>(7286 – 30 838)            | 3268<br>(2639 – 3977)       | 0.04<br>(0.03 – 0.05) | 1979<br>(1825 – 2115)       | 8769<br>(6614 – 11 105)        |
| Seychelles                       | 99<br>(81 – 120)   | 5.22<br>(4.5 – 5.95)    | 141<br>(84 – 196)                    | 9062<br>(7008 – 11 218)     | 0.04<br>(0.03 – 0.05) | 9<br>(8 – 10)               | 120<br>(90 – 153)              |
| Thailand                         | 85<br>(71 – 102)   | 3.7<br>(3.13 – 4.29)    | 194 354<br>(161 103 – 226 590)       | 5170<br>(4124 – 6381)       | 0.04<br>(0.04 – 0.05) | 6255<br>(5714 – 6751)       | 62 090<br>(48 310 – 77 068)    |
| Timor-Leste                      | 7<br>(6 – 9)       | 6.53<br>(5.49 – 7.85)   | 946<br>(44 – 1620)                   | 1114<br>(874 – 1424)        | 0.03<br>(0.03 – 0.04) | 111<br>(103 – 118)          | 165<br>(123 – 215)             |
| Vietnam                          | 41<br>(35 – 50)    | 3.77<br>(3.17 – 4.38)   | 260 504<br>(214 653 – 306 356)       | 2981<br>(2422 – 3641)       | 0.04<br>(0.03 – 0.05) | 8926<br>(8260 – 9545)       | 47 288<br>(37 451 – 57 870)    |
| Sub-Saharan Africa               | ..                 | 3.77<br>(3.22 – 4.42)   | 3 020 640<br>(2 414 437 – 3 539 543) | ..                          | 0.06<br>(0.05 – 0.07) | 87 442<br>(76 512 – 95 734) | 151 714<br>(116 765 – 184 262) |
| Central sub-Saharan Africa       | ..                 | 3.5<br>(2.92 – 4.23)    | 393 978<br>(301 686 – 465 275)       | ..                          | 0.07<br>(0.06 – 0.09) | 9590<br>(7859 – 11 045)     | 6246<br>(4399 – 8114)          |
| Angola                           | 17<br>(13 – 21)    | 4.07<br>(3.36 – 4.76)   | 63 953<br>(46 328 – 81 532)          | 676<br>(529 – 864)          | 0.08<br>(0.06 – 0.09) | 1717<br>(1302 – 2081)       | 2868<br>(1956 – 3907)          |
| Central African Republic         | 2<br>(2 – 3)       | 2.87<br>(2.36 – 3.66)   | 25 402<br>(20 393 – 28 715)          | 87<br>(68 – 106)            | 0.06<br>(0.05 – 0.07) | 589<br>(507 – 653)          | 131<br>(98 – 164)              |
| Congo (Brazzaville)              | 13<br>(10 – 16)    | 4.88<br>(4.12 – 5.96)   | 10 362<br>(6201 – 13 219)            | 552<br>(437 – 683)          | 0.09<br>(0.08 – 0.11) | 282<br>(203 – 349)          | 374<br>(242 – 498)             |
| Democratic Republic of the Congo | 3<br>(2 – 4)       | 3.26<br>(2.68 – 4.0)    | 290 433<br>(227 403 – 340 120)       | 128<br>(101 – 158)          | 0.07<br>(0.06 – 0.08) | 6881<br>(5634 – 7924)       | 2250<br>(1632 – 2867)          |
| Equatorial Guinea                | 81<br>(64 – 105)   | 5.67<br>(4.75 – 6.85)   | 1471<br>(691 – 2070)                 | 3478<br>(2649 – 4457)       | 0.1<br>(0.08 – 0.11)  | 47<br>(34 – 59)             | 368<br>(226 – 524)             |
| Gabon                            | 38<br>(30 – 46)    | 5.75<br>(4.79 – 7.02)   | 2358<br>(798 – 3489)                 | 1447<br>(1170 – 1784)       | 0.11<br>(0.09 – 0.13) | 75<br>(43 – 100)            | 255<br>(136 – 369)             |
| Eastern sub-Saharan Africa       | ..                 | 4.28<br>(3.67 – 5.01)   | 996 828<br>(743 228 – 1 207 013)     | ..                          | 0.05<br>(0.05 – 0.06) | 36 696<br>(33 170 – 39 410) | 41 737<br>(32 773 – 50 268)    |
| Burundi                          | 2<br>(2 – 3)       | 5.98<br>(5.02 – 7.3)    | 11 871<br>(3913 – 18 542)            | 249<br>(199 – 308)          | 0.05<br>(0.04 – 0.06) | 1158<br>(1015 – 1274)       | 400<br>(287 – 521)             |
| Comoros                          | 8<br>(6 – 9)       | 5.91<br>(4.89 – 7.38)   | 955<br>(243 – 1488)                  | 265<br>(207 – 329)          | 0.15<br>(0.12 – 0.18) | 15<br>(4 – 23)              | 15<br>(6 – 23)                 |
| Djibouti                         | 10<br>(8 – 12)     | 4.89<br>(4.06 – 6.02)   | 1304<br>(408 – 1940)                 | 622<br>(497 – 754)          | 0.06<br>(0.05 – 0.08) | 70<br>(57 – 79)             | 71<br>(48 – 95)                |
| Eritrea                          | 2<br>(2 – 3)       | 5.08<br>(4.22 – 6.0)    | 9630<br>(5819 – 13 329)              | 170<br>(131 – 216)          | 0.06<br>(0.05 – 0.08) | 408<br>(344 – 462)          | 118<br>(80 – 158)              |
| Ethiopia                         | 6<br>(5 – 8)       | 3.94<br>(3.28 – 4.61)   | 273 222<br>(206 661 – 334 516)       | 667<br>(531 – 851)          | 0.03<br>(0.03 – 0.04) | 10 888<br>(10 182 – 11 519) | 11 402<br>(8628 – 14 483)      |
| Kenya                            | 14<br>(11 – 16)    | 4.98<br>(4.24 – 5.94)   | 98 404<br>(62 012 – 127 388)         | 1048<br>(846 – 1245)        | 0.05<br>(0.04 – 0.06) | 4086<br>(3634 – 4445)       | 7052<br>(5246 – 8748)          |
| Madagascar                       | 5<br>(4 – 6)       | 4.19<br>(3.44 – 5.3)    | 60 315<br>(32 355 – 79 371)          | 386<br>(308 – 490)          | 0.05<br>(0.04 – 0.06) | 2491<br>(2225 – 2719)       | 1613<br>(1154 – 2105)          |
| Malawi                           | 11<br>(10 – 14)    | 2.91<br>(2.39 – 3.48)   | 80 086<br>(68 235 – 90 326)          | 601<br>(489 – 710)          | 0.05<br>(0.04 – 0.06) | 2061<br>(1859 – 2214)       | 2734<br>(2161 – 3304)          |
| Mozambique                       | 6<br>(5 – 7)       | 3.53<br>(2.93 – 4.27)   | 111 554<br>(86 778 – 131 250)        | 386<br>(309 – 472)          | 0.04<br>(0.04 – 0.05) | 3467<br>(3119 – 3768)       | 2497<br>(1912 – 3077)          |
| Rwanda                           | 8<br>(7 – 8)       | 6.41<br>(5.86 – 7.0)    | 9032<br>(3988 – 13 555)              | 1378<br>(1106 – 1718)       | 0.03<br>(0.02 – 0.04) | 1267<br>(1188 – 1341)       | 2272<br>(1726 – 2919)          |
| Somalia                          | 3<br>(2 – 4)       | 4.21<br>(3.49 – 5.13)   | 31 363<br>(22 963 – 38 164)          | 202<br>(158 – 251)          | 0.05<br>(0.04 – 0.07) | 1007<br>(886 – 1104)        | 373<br>(276 – 472)             |
| South Sudan                      | 9<br>(7 – 10)      | 2.81<br>(2.34 – 3.47)   | 53 687<br>(42 287 – 62 028)          | 439<br>(348 – 537)          | 0.04<br>(0.04 – 0.06) | 1594<br>(1410 – 1743)       | 1467<br>(1109 – 1808)          |
| Tanzania                         | 9<br>(8 – 11)      | 5.46<br>(4.54 – 6.56)   | 82 667<br>(28 247 – 127 002)         | 415<br>(328 – 515)          | 0.1<br>(0.08 – 0.12)  | 2717<br>(1706 – 3547)       | 2449<br>(1278 – 3550)          |
| Uganda                           | 11<br>(10 – 12)    | 4.17<br>(3.85 – 4.51)   | 104 655<br>(89 660 – 119 680)        | 780<br>(658 – 909)          | 0.05<br>(0.04 – 0.06) | 4041<br>(3717 – 4317)       | 5393<br>(4451 – 6380)          |

|                             |                   |                       |                                      |                       |                       |                             |                             |
|-----------------------------|-------------------|-----------------------|--------------------------------------|-----------------------|-----------------------|-----------------------------|-----------------------------|
| Zambia                      | 26<br>(20 – 32)   | 2.97<br>(2.42 – 3.68) | 68 083<br>(55 857 – 77 098)          | 904<br>(721 – 1103)   | 0.07<br>(0.06 – 0.08) | 1426<br>(1181 – 1625)       | 3881<br>(2887 – 4887)       |
| Southern sub-Saharan Africa | ..                | 3.32<br>(2.82 – 3.9)  | 315 824<br>(272 681 – 351 952)       | ..                    | 0.13<br>(0.1 – 0.16)  | 3230<br>(1217 – 4639)       | 44 537<br>(32 407 – 57 462) |
| Botswana                    | 109<br>(89 – 134) | 3.92<br>(3.27 – 4.69) | 6989<br>(5418 – 8325)                | 3777<br>(2935 – 4698) | 0.09<br>(0.07 – 0.1)  | 144<br>(109 – 174)          | 1680<br>(1174 – 2200)       |
| Lesotho                     | 28<br>(22 – 34)   | 2.42<br>(2.0 – 2.92)  | 14 410<br>(13 144 – 15 473)          | 974<br>(787 – 1203)   | 0.06<br>(0.05 – 0.07) | 287<br>(255 – 315)          | 867<br>(692 – 1055)         |
| Namibia                     | 115<br>(93 – 139) | 3.57<br>(3.01 – 4.26) | 8217<br>(6723 – 9470)                | 2997<br>(2395 – 3697) | 0.1<br>(0.09 – 0.13)  | 120<br>(79 – 155)           | 1673<br>(1168 – 2190)       |
| South Africa                | 118<br>(98 – 140) | 3.53<br>(2.99 – 4.17) | 212 016<br>(181 378 – 239 044)       | 2060<br>(1513 – 2739) | 0.15<br>(0.12 – 0.2)  | 1078<br>(-660 – 2294)       | 35 366<br>(24 782 – 46 588) |
| Swaziland (eSwatini)        | 80<br>(65 – 100)  | 2.93<br>(2.43 – 3.53) | 6271<br>(5439 – 6994)                | 5141<br>(4059 – 6549) | 0.04<br>(0.03 – 0.04) | 171<br>(159 – 181)          | 1753<br>(1377 – 2181)       |
| Zimbabwe                    | 21<br>(17 – 25)   | 2.73<br>(2.28 – 3.31) | 67 921<br>(59 244 – 75 421)          | 769<br>(611 – 951)    | 0.06<br>(0.05 – 0.08) | 1431<br>(1214 – 1613)       | 3197<br>(2424 – 3924)       |
| Western sub-Saharan Africa  | ..                | 3.49<br>(2.96 – 4.14) | 1 314 010<br>(1 052 581 – 1 531 034) | ..                    | 0.06<br>(0.05 – 0.07) | 37 925<br>(33 376 – 41 367) | 59 195<br>(45 386 – 72 398) |
| Benin                       | 7<br>(5 – 8)      | 3.71<br>(3.13 – 4.39) | 32 265<br>(24 674 – 38 953)          | 400<br>(320 – 481)    | 0.05<br>(0.04 – 0.06) | 1073<br>(949 – 1179)        | 809<br>(610 – 1006)         |
| Burkina Faso                | 14<br>(12 – 17)   | 1.6<br>(1.32 – 1.89)  | 107 078<br>(99 758 – 113 840)        | 402<br>(325 – 499)    | 0.05<br>(0.04 – 0.06) | 2156<br>(1938 – 2353)       | 3024<br>(2475 – 3607)       |
| Cameroon                    | 11<br>(9 – 14)    | 4.07<br>(3.32 – 5.14) | 67 795<br>(42 948 – 85 051)          | 608<br>(489 – 735)    | 0.06<br>(0.05 – 0.07) | 2145<br>(1835 – 2406)       | 2637<br>(1887 – 3388)       |
| Cape Verde                  | 24<br>(19 – 28)   | 6.16<br>(5.2 – 7.44)  | 465<br>(23 – 813)                    | 1360<br>(1090 – 1638) | 0.09<br>(0.07 – 0.1)  | 32<br>(23 – 38)             | 69<br>(41 – 94)             |
| Chad                        | 8<br>(7 – 10)     | 2.96<br>(2.47 – 3.79) | 58 393<br>(44 688 – 67 045)          | 525<br>(412 – 659)    | 0.04<br>(0.03 – 0.05) | 1769<br>(1601 – 1900)       | 1806<br>(1358 – 2249)       |
| Cote d'Ivoire               | 14<br>(11 – 17)   | 3.92<br>(3.26 – 4.72) | 65 217<br>(46 680 – 80 859)          | 699<br>(571 – 862)    | 0.06<br>(0.05 – 0.08) | 1959<br>(1663 – 2225)       | 2893<br>(2089 – 3721)       |
| The Gambia                  | 7<br>(6 – 9)      | 5.31<br>(4.39 – 6.33) | 2790<br>(1133 – 4250)                | 551<br>(438 – 669)    | 0.06<br>(0.05 – 0.07) | 163<br>(135 – 184)          | 140<br>(96 – 185)           |
| Ghana                       | 18<br>(16 – 20)   | 4.79<br>(4.38 – 5.18) | 53 317<br>(44 430 – 62 866)          | 1635<br>(1311 – 1954) | 0.04<br>(0.04 – 0.05) | 2674<br>(2465 – 2855)       | 6648<br>(5206 – 8094)       |
| Guinea                      | 5<br>(4 – 6)      | 3.45<br>(2.88 – 4.14) | 43 783<br>(34 234 – 52 028)          | 282<br>(226 – 344)    | 0.05<br>(0.04 – 0.06) | 1319<br>(1174 – 1442)       | 736<br>(561 – 908)          |
| Guinea-Bissau               | 8<br>(7 – 10)     | 3.65<br>(3.05 – 4.35) | 5952<br>(4596 – 7065)                | 460<br>(366 – 571)    | 0.06<br>(0.05 – 0.07) | 176<br>(153 – 196)          | 166<br>(125 – 210)          |
| Liberia                     | 13<br>(10 – 16)   | 3.58<br>(2.99 – 4.36) | 15 502<br>(11 817 – 18 396)          | 736<br>(591 – 907)    | 0.06<br>(0.05 – 0.07) | 446<br>(388 – 493)          | 673<br>(502 – 848)          |
| Mali                        | 12<br>(10 – 14)   | 2.08<br>(1.84 – 2.33) | 96 252<br>(89 929 – 102 622)         | 680<br>(593 – 771)    | 0.03<br>(0.03 – 0.03) | 2571<br>(2465 – 2671)       | 3628<br>(3169 – 4085)       |
| Mauritania                  | 13<br>(10 – 16)   | 5.25<br>(4.36 – 6.39) | 6893<br>(3621 – 9457)                | 645<br>(514 – 791)    | 0.08<br>(0.07 – 0.1)  | 231<br>(172 – 279)          | 305<br>(206 – 408)          |
| Niger                       | 6<br>(5 – 7)      | 2.41<br>(1.97 – 3.0)  | 97 816<br>(83 636 – 109 861)         | 268<br>(211 – 327)    | 0.04<br>(0.04 – 0.05) | 2520<br>(2253 – 2718)       | 1556<br>(1204 – 1907)       |
| Nigeria                     | 19<br>(15 – 24)   | 3.54<br>(2.93 – 4.3)  | 595 624<br>(450 474 – 717 983)       | 830<br>(650 – 1023)   | 0.06<br>(0.05 – 0.08) | 15 940<br>(13 191 – 18 072) | 31 179<br>(22 410 – 40 156) |
| Sao Tome and Principe       | 17<br>(13 – 21)   | 4.94<br>(4.12 – 6.03) | 315<br>(156 – 439)                   | 793<br>(631 – 977)    | 0.09<br>(0.07 – 0.11) | 11<br>(7 – 13)              | 18<br>(11 – 24)             |
| Senegal                     | 9<br>(8 – 11)     | 4.16<br>(3.51 – 4.94) | 36 370<br>(25 259 – 45 456)          | 664<br>(531 – 811)    | 0.05<br>(0.04 – 0.06) | 1383<br>(1233 – 1510)       | 1591<br>(1216 – 2007)       |
| Sierra Leone                | 8<br>(6 – 9)      | 6.14<br>(5.1 – 7.57)  | 7602<br>(2229 – 11 947)              | 815<br>(639 – 1009)   | 0.05<br>(0.04 – 0.06) | 722<br>(648 – 786)          | 811<br>(586 – 1046)         |
| Togo                        | 7<br>(6 – 8)      | 4.08<br>(3.43 – 4.93) | 20 583<br>(14 857 – 25 208)          | 400<br>(325 – 493)    | 0.06<br>(0.05 – 0.07) | 637<br>(539 – 714)          | 508<br>(370 – 649)          |

## References

- 1 GBD 2016 SDG Collaborators. Measuring progress and projecting attainment on the basis of past trends of the health-related Sustainable Development Goals in 188 countries: an analysis from the Global Burden of Disease Study 2016. *Lancet Lond Engl* 2017; **390**: 1423–59.
- 2 United States Census Bureau. Computer Assisted Personal Interviewing manual for National Health Interview Survey field representatives. 2018; published online Jan. [ftp://ftp.cdc.gov/pub/Health\\_Statistics/NCHS/Survey\\_Questionnaires/NHIS/2018/frmanual.pdf](ftp://ftp.cdc.gov/pub/Health_Statistics/NCHS/Survey_Questionnaires/NHIS/2018/frmanual.pdf).
- 3 Lavado RF, Brooks BPC, Hanlon M. Estimating health expenditure shares from household surveys. *World Health Organ Bull World Health Organ Geneva* 2013; **91**: 519-24C.
- 4 Ngandu NK, Manda S, Besada D, Rohde S, Oliphant NP, Doherty T. Does adjusting for recall in trend analysis affect coverage estimates for maternal and child health indicators? An analysis of DHS and MICS survey data. *Glob Health Action* 2016; **9**: 32408.
- 5 Lu C, Chin B, Li G, Murray CJ. Limitations of methods for measuring out-of-pocket and catastrophic private health expenditures. *Bull World Health Organ* 2009; **87**: 238–44.
- 6 Flaxman AD, Vos T, Murray CJL, Kiyono P, editors. An Integrative MetaRegression Framework for Descriptive Epidemiology, 1 edition. Seattle: University of Washington Press, 2015.
- 7 GBD 2016 Disease and Injury Incidence and Prevalence Collaborators. Global, regional, and national incidence, prevalence, and years lived with disability for 328 diseases and injuries for 195 countries, 1990-2016: a systematic analysis for the Global Burden of Disease Study 2016. *Lancet Lond Engl* 2017; **390**: 1211–59.
- 8 Getzen TE. Health care is an individual necessity and a national luxury: applying multilevel decision models to the analysis of health care expenditures. *J Health Econ* 2000; **19**: 259–70.
- 9 Fletcher JM, Frisvold DE. Higher Education and Health Investments: Does More Schooling Affect Preventive Health Care Use? *J Hum Cap* 2009; **3**: 144–76.
- 10 GBD 2015 Mortality and Causes of Death Collaborators. Global, regional, and national life expectancy, all-cause mortality, and cause-specific mortality for 249 causes of death, 1980-2015: a systematic analysis for the Global Burden of Disease Study 2015. *Lancet Lond Engl* 2016; **388**: 1459–544.
- 11 GBD 2016 Mortality Collaborators. Global, regional, and national under-5 mortality, adult mortality, age-specific mortality, and life expectancy, 1970-2016: a systematic analysis for the Global Burden of Disease Study 2016. *Lancet Lond Engl* 2017; **390**: 1084–150.
- 12 World Development Indicators | The World Bank. <http://wdi.worldbank.org/table/2.12> (accessed May 5, 2017).
- 13 GBD 2016 Risk Factors Collaborators. Global, regional, and national comparative risk assessment of 84 behavioural, environmental and occupational, and metabolic risks or clusters of risks, 1990-2016: a systematic analysis for the Global Burden of Disease Study 2016. *Lancet Lond Engl* 2017; **390**: 1345–422.
- 14 GBD 2013 Mortality and Causes of Death Collaborators. Global, regional, and national age-sex specific all-cause and cause-specific mortality for 240 causes of death, 1990-2013: a systematic analysis for the Global Burden of Disease Study 2013. *Lancet Lond Engl* 2015; **385**: 117–71.
- 15 OECD, WHO, Eurostat. A System of Health Accounts. Paris: Organisation for Economic Co-operation and Development, 2011 <http://www.oecd-ilibrary.org/content/book/9789264116016-en> (accessed April 29, 2017).

- 16 Bui AL, Lavado RF, Johnson EK, *et al.* National health accounts data from 1996 to 2010: a systematic review. *Bull World Health Organ* 2015; **93**: 566-576D.
- 17 Dieleman J, Campbell M, Chapin A, *et al.* Evolution and patterns of global health financing 1995–2014: development assistance for health, and government, prepaid private, and out-of-pocket health spending in 184 countries. *The Lancet* 2017; **389**: 1981–2004.
- 18 Dieleman JL, Haakenstad A, Micah A, *et al.* Spending on health and HIV/AIDS: domestic health spending and development assistance in 188 countries, 1995–2015. *The Lancet* 2018; **391**: 1799–829.
- 19 Dieleman JL, Sadat N, Chang AY, *et al.* Trends in future health financing and coverage: future health spending and universal health coverage in 188 countries, 2016–40. *The Lancet* 2018; **391**: 1783–98.
- 20 Stenberg K, Lauer JA, Gkountouras G, Fitzpatrick C, Stanciole A. Econometric estimation of WHO-CHOICE country-specific costs for inpatient and outpatient health service delivery. *Cost Eff Resour Alloc* 2018; **16**: 11.
- 21 WHO | Health service delivery costs. WHO. [http://www.who.int/choice/cost-effectiveness/inputs/health\\_service/en/](http://www.who.int/choice/cost-effectiveness/inputs/health_service/en/) (accessed July 15, 2018).
- 22 World Economic Outlook Database April 2017. <https://www.imf.org/external/pubs/ft/weo/2017/01/weodata/index.aspx> (accessed Sept 6, 2017).
- 23 Reference costs | NHS Improvement. <https://improvement.nhs.uk/resources/reference-costs/> (accessed July 26, 2018).
- 24 Understanding Variability in the Cost of a Standard Hospital Stay. 2017 <https://apps.uqo.ca/LoginSigparb/LoginPourRessources.aspx?url=http://www.deslibris.ca/ID/10096045> (accessed July 17, 2018).
- 25 Dieleman J, Financing Global Health 2017 Collaborator network. Tracking spending on health and HIV/AIDS: 188 countries, 1995-2015. *Forthcom Lancet*.
- 26 Dieleman J, Financing Global Health 2017 Collaborator network. Estimating future health spending and universal health coverage, 2016-2040. *Forthcom Lancet*.
- 27 GBD 2016 Healthcare Access and Quality Collaborators. Measuring performance on the Healthcare Access and Quality Index for 195 countries and territories and selected subnational locations: a systematic analysis from the Global Burden of Disease Study 2016. *Lancet Lond Engl* 2018; **391**: 2236–71.
- 28 Barber RM, Fullman N, Sorensen RJD, *et al.* Healthcare Access and Quality Index based on mortality from causes amenable to personal health care in 195 countries and territories, 1990–2015: a novel analysis from the Global Burden of Disease Study 2015. *The Lancet* 2017; **0**. DOI:10.1016/S0140-6736(17)30818-8.

**Table S5. Data sources used in the utilisation estimates and their attributes by country and years**

**Table S5: Data sources used in the utilisation estimates and their attributes by country and years**

| Location    | Year | Citation                                                                                                                                                                                                                                                                                                                                    | Data source used in outpatient model | Outpatient recall period in weeks | Data source used in inpatient model | Inpatient recall period in weeks | Data source used as reference data | Age range | Sexes |
|-------------|------|---------------------------------------------------------------------------------------------------------------------------------------------------------------------------------------------------------------------------------------------------------------------------------------------------------------------------------------------|--------------------------------------|-----------------------------------|-------------------------------------|----------------------------------|------------------------------------|-----------|-------|
| Afghanistan | 2006 | Indian Institute of Health Management Research (IIHMR), Johns Hopkins University (JHU), Ministry of Public Health (Afghanistan). Afghanistan Health Survey 2006.                                                                                                                                                                            | X                                    | 4.3                               |                                     |                                  |                                    | All ages  | Both  |
| Afghanistan | 2010 | Central Statistics Organization (Afghanistan), ICF Macro, Indian Institute of Health Management Research (IIHMR), Ministry of Public Health (Afghanistan), World Health Organization Regional Office for the Eastern Mediterranean (EMRO-WHO). Afghanistan Special Demographic and Health Survey 2010. Calverton, United States: ICF Macro. | X                                    | 4.3                               | X                                   | 52                               |                                    | All ages  | Both  |
| Albania     | 1993 | Ministry of Health (Albania). Albania Inpatient Care Discharges per 100 1993.                                                                                                                                                                                                                                                               |                                      |                                   | X                                   |                                  | X                                  | All ages  | Both  |
| Albania     | 1994 | Ministry of Health (Albania). Albania Inpatient Care Discharges per 100 1994.                                                                                                                                                                                                                                                               |                                      |                                   | X                                   |                                  | X                                  | All ages  | Both  |
| Albania     | 1995 | Ministry of Health (Albania). Albania Inpatient Care Discharges per 100 1995.                                                                                                                                                                                                                                                               |                                      |                                   | X                                   |                                  | X                                  | All ages  | Both  |
| Albania     | 1996 | Ministry of Health (Albania). Albania Inpatient Care Discharges per 100 1996.                                                                                                                                                                                                                                                               |                                      |                                   | X                                   |                                  | X                                  | All ages  | Both  |
| Albania     | 1997 | Ministry of Health (Albania). Albania Inpatient Care Discharges per 100 1997.                                                                                                                                                                                                                                                               |                                      |                                   | X                                   |                                  | X                                  | All ages  | Both  |
| Albania     | 1998 | Ministry of Health (Albania). Albania Inpatient Care Discharges per 100 1998.                                                                                                                                                                                                                                                               |                                      |                                   | X                                   |                                  | X                                  | All ages  | Both  |
| Albania     | 1999 | Ministry of Health (Albania). Albania Inpatient Care Discharges per 100 1999.                                                                                                                                                                                                                                                               |                                      |                                   | X                                   |                                  | X                                  | All ages  | Both  |
| Albania     | 2000 | Ministry of Health (Albania). Albania Inpatient Care Discharges per 100 2000.                                                                                                                                                                                                                                                               |                                      |                                   | X                                   |                                  | X                                  | All ages  | Both  |
| Albania     | 2001 | Ministry of Health (Albania). Albania Inpatient Care Discharges per 100 2001.                                                                                                                                                                                                                                                               |                                      |                                   | X                                   |                                  | X                                  | All ages  | Both  |
| Albania     | 2002 | National Institute of Statistics (Albania), World Bank (WB). Albania Living Standards Measurement Survey 2002. Washington DC, United States: World Bank (WB).                                                                                                                                                                               | X                                    | 4                                 | X                                   | 52                               |                                    | All ages  | Both  |
| Albania     | 2002 | Ministry of Health (Albania). Albania Inpatient Care Discharges per 100 2002.                                                                                                                                                                                                                                                               |                                      |                                   | X                                   |                                  | X                                  | All ages  | Both  |
| Albania     | 2003 | Ministry of Health (Albania). Albania Inpatient Care Discharges per 100 2003.                                                                                                                                                                                                                                                               |                                      |                                   | X                                   |                                  | X                                  | All ages  | Both  |
| Albania     | 2004 | National Institute of Statistics (Albania), World Bank (WB). Albania Living Standards Measurement Survey 2004. Washington DC, United States: World Bank (WB).                                                                                                                                                                               | X                                    | 4                                 |                                     |                                  |                                    | All ages  | Both  |
| Albania     | 2004 | Ministry of Health (Albania). Albania Inpatient Care Discharges per 100 2004.                                                                                                                                                                                                                                                               |                                      |                                   | X                                   |                                  | X                                  | All ages  | Both  |
| Albania     | 2005 | National Institute of Statistics (Albania), World Bank (WB). Albania Living Standards Measurement Survey 2005. Washington DC, United States: World Bank (WB).                                                                                                                                                                               |                                      |                                   | X                                   | 52                               |                                    | All ages  | Both  |
| Albania     | 2005 | Ministry of Health (Albania). Albania Inpatient Care Discharges per 100 2005.                                                                                                                                                                                                                                                               |                                      |                                   | X                                   |                                  | X                                  | All ages  | Both  |
| Albania     | 2006 | Ministry of Health (Albania). Albania Inpatient Care Discharges per 100 2006.                                                                                                                                                                                                                                                               |                                      |                                   | X                                   |                                  | X                                  | All ages  | Both  |
| Albania     | 2007 | Ministry of Health (Albania). Albania Inpatient Care Discharges per 100 2007.                                                                                                                                                                                                                                                               |                                      |                                   | X                                   |                                  | X                                  | All ages  | Both  |
| Albania     | 2008 | Ministry of Health (Albania). Albania Inpatient Care Discharges per 100 2008.                                                                                                                                                                                                                                                               |                                      |                                   | X                                   |                                  | X                                  | All ages  | Both  |
| Albania     | 2009 | Ministry of Health (Albania). Albania Inpatient Care Discharges per 100 2009.                                                                                                                                                                                                                                                               |                                      |                                   | X                                   |                                  | X                                  | All ages  | Both  |
| Albania     | 2010 | Ministry of Health (Albania). Albania Inpatient Care Discharges per 100 2010.                                                                                                                                                                                                                                                               |                                      |                                   | X                                   |                                  | X                                  | All ages  | Both  |
| Albania     | 2011 | Ministry of Health (Albania). Albania Inpatient Care Discharges per 100 2011.                                                                                                                                                                                                                                                               |                                      |                                   | X                                   |                                  | X                                  | All ages  | Both  |
| Albania     | 2012 | Ministry of Health (Albania). Albania Inpatient Care Discharges per 100 2012.                                                                                                                                                                                                                                                               |                                      |                                   | X                                   |                                  | X                                  | All ages  | Both  |
| Albania     | 2013 | Ministry of Health (Albania). Albania Inpatient Care Discharges per 100 2013.                                                                                                                                                                                                                                                               |                                      |                                   | X                                   |                                  | X                                  | All ages  | Both  |
| Algeria     | 2005 | National Institute of Public Health, Ministry of Health, Population, and Hospital Reform (Algeria). Algeria National Health Survey 2005.                                                                                                                                                                                                    | X                                    | 12.9                              |                                     |                                  |                                    | All ages  | Both  |
| Angola      | 2008 | National Institute of Statistics (Angola), Oxford Policy Management, United Nations Children's Fund (UNICEF). Angola Integrated Inquiry into People's Well-Being 2008-2009.                                                                                                                                                                 | X                                    | 4.3                               |                                     |                                  |                                    | All ages  | Both  |
| Argentina   | 2000 | Gallup Europe, World Health Organization (WHO). Argentina WHO Multi-country Survey Study on Health and Health System Responsiveness 2000-2001. Geneva, Switzerland: World Health Organization (WHO).                                                                                                                                        | X                                    | 4.3                               | X                                   | 4.3                              |                                    | 15-95     | Both  |
| Argentina   | 2005 | Center for the Study of State and Society (CEDES), Ministry of Health and Environment (Argentina), National Institute of Statistics and Censuses (Argentina). Argentina National Survey of Risk Factors 2005.                                                                                                                               | X                                    | 52                                |                                     |                                  |                                    | 15-100+   | Male  |
| Argentina   | 2009 | Ministry of Health (Argentina), National Institute of Statistics and Censuses (Argentina). Argentina National Survey of Risk Factors 2009.                                                                                                                                                                                                  | X                                    | 52                                |                                     |                                  |                                    | 15-100+   | Both  |
| Armenia     | 1980 | Ministry of Health (Armenia). Armenia Inpatient Care Discharges per 100 1980.                                                                                                                                                                                                                                                               |                                      |                                   | X                                   |                                  | X                                  | All ages  | Both  |
| Armenia     | 1981 | Ministry of Health (Armenia). Armenia Inpatient Care Discharges per 100 1981.                                                                                                                                                                                                                                                               |                                      |                                   | X                                   |                                  | X                                  | All ages  | Both  |
| Armenia     | 1982 | Ministry of Health (Armenia). Armenia Inpatient Care Discharges per 100 1982.                                                                                                                                                                                                                                                               |                                      |                                   | X                                   |                                  | X                                  | All ages  | Both  |



|         |      |                                                                                                                                                                                                                                                                           |   |  |   |    |   |          |      |
|---------|------|---------------------------------------------------------------------------------------------------------------------------------------------------------------------------------------------------------------------------------------------------------------------------|---|--|---|----|---|----------|------|
| Armenia | 1983 | Ministry of Health (Armenia). Armenia Inpatient Care Discharges per 100 1983.                                                                                                                                                                                             |   |  | X |    | X | All ages | Both |
| Armenia | 1984 | Ministry of Health (Armenia). Armenia Inpatient Care Discharges per 100 1984.                                                                                                                                                                                             |   |  | X |    | X | All ages | Both |
| Armenia | 1985 | Ministry of Health (Armenia). Armenia Inpatient Care Discharges per 100 1985.                                                                                                                                                                                             |   |  | X |    | X | All ages | Both |
| Armenia | 1986 | Ministry of Health (Armenia). Armenia Inpatient Care Discharges per 100 1986.                                                                                                                                                                                             |   |  | X |    | X | All ages | Both |
| Armenia | 1987 | Ministry of Health (Armenia). Armenia Inpatient Care Discharges per 100 1987.                                                                                                                                                                                             |   |  | X |    | X | All ages | Both |
| Armenia | 1988 | Ministry of Health (Armenia). Armenia Inpatient Care Discharges per 100 1988.                                                                                                                                                                                             |   |  | X |    | X | All ages | Both |
| Armenia | 1989 | Ministry of Health (Armenia). Armenia Inpatient Care Discharges per 100 1989.                                                                                                                                                                                             |   |  | X |    | X | All ages | Both |
| Armenia | 1990 | Ministry of Health (Armenia). Armenia Inpatient Care Discharges per 100 1990.                                                                                                                                                                                             |   |  | X |    | X | All ages | Both |
| Armenia | 1991 | Ministry of Health (Armenia). Armenia Inpatient Care Discharges per 100 1991.                                                                                                                                                                                             |   |  | X |    | X | All ages | Both |
| Armenia | 1992 | Ministry of Health (Armenia). Armenia Inpatient Care Discharges per 100 1992.                                                                                                                                                                                             |   |  | X |    | X | All ages | Both |
| Armenia | 1993 | Ministry of Health (Armenia). Armenia Inpatient Care Discharges per 100 1993.                                                                                                                                                                                             |   |  | X |    | X | All ages | Both |
| Armenia | 1994 | Ministry of Health (Armenia). Armenia Inpatient Care Discharges per 100 1994.                                                                                                                                                                                             |   |  | X |    | X | All ages | Both |
| Armenia | 1995 | Ministry of Health (Armenia). Armenia Inpatient Care Discharges per 100 1995.                                                                                                                                                                                             |   |  | X |    | X | All ages | Both |
| Armenia | 1996 | Ministry of Health (Armenia). Armenia Inpatient Care Discharges per 100 1996.                                                                                                                                                                                             |   |  | X |    | X | All ages | Both |
| Armenia | 1997 | Ministry of Health (Armenia). Armenia Inpatient Care Discharges per 100 1997.                                                                                                                                                                                             |   |  | X |    | X | All ages | Both |
| Armenia | 1998 | Ministry of Health (Armenia). Armenia Inpatient Care Discharges per 100 1998.                                                                                                                                                                                             |   |  | X |    | X | All ages | Both |
| Armenia | 1998 | Ministry of Health (Armenia). Armenia Outpatient Contacts Per Person Per Year 1998.                                                                                                                                                                                       | X |  |   |    | X | All ages | Both |
| Armenia | 1999 | Ministry of Health (Armenia). Armenia Inpatient Care Discharges per 100 1999.                                                                                                                                                                                             |   |  | X |    | X | All ages | Both |
| Armenia | 1999 | Ministry of Health (Armenia). Armenia Outpatient Contacts Per Person Per Year 1999.                                                                                                                                                                                       | X |  |   |    | X | All ages | Both |
| Armenia | 2000 | Ministry of Health (Armenia). Armenia Inpatient Care Discharges per 100 2000.                                                                                                                                                                                             |   |  | X |    | X | All ages | Both |
| Armenia | 2000 | Ministry of Health (Armenia). Armenia Outpatient Contacts Per Person Per Year 2000.                                                                                                                                                                                       | X |  |   |    | X | All ages | Both |
| Armenia | 2001 | Ministry of Health (Armenia). Armenia Inpatient Care Discharges per 100 2001.                                                                                                                                                                                             |   |  | X |    | X | All ages | Both |
| Armenia | 2001 | Ministry of Health (Armenia). Armenia Outpatient Contacts Per Person Per Year 2001.                                                                                                                                                                                       | X |  |   |    | X | All ages | Both |
| Armenia | 2002 | Ministry of Health (Armenia). Armenia Inpatient Care Discharges per 100 2002.                                                                                                                                                                                             |   |  | X |    | X | All ages | Both |
| Armenia | 2002 | Ministry of Health (Armenia). Armenia Outpatient Contacts Per Person Per Year 2002.                                                                                                                                                                                       | X |  |   |    | X | All ages | Both |
| Armenia | 2003 | Ministry of Health (Armenia). Armenia Inpatient Care Discharges per 100 2003.                                                                                                                                                                                             |   |  | X |    | X | All ages | Both |
| Armenia | 2003 | Ministry of Health (Armenia). Armenia Outpatient Contacts Per Person Per Year 2003.                                                                                                                                                                                       | X |  |   |    | X | All ages | Both |
| Armenia | 2004 | Ministry of Health (Armenia). Armenia Inpatient Care Discharges per 100 2004.                                                                                                                                                                                             |   |  | X |    | X | All ages | Both |
| Armenia | 2004 | Ministry of Health (Armenia). Armenia Outpatient Contacts Per Person Per Year 2004.                                                                                                                                                                                       | X |  |   |    | X | All ages | Both |
| Armenia | 2005 | Ministry of Health (Armenia). Armenia Inpatient Care Discharges per 100 2005.                                                                                                                                                                                             |   |  | X |    | X | All ages | Both |
| Armenia | 2005 | Ministry of Health (Armenia). Armenia Outpatient Contacts Per Person Per Year 2005.                                                                                                                                                                                       | X |  |   |    | X | All ages | Both |
| Armenia | 2006 | Ministry of Health (Armenia). Armenia Inpatient Care Discharges per 100 2006.                                                                                                                                                                                             |   |  | X |    | X | All ages | Both |
| Armenia | 2006 | Ministry of Health (Armenia). Armenia Outpatient Contacts Per Person Per Year 2006.                                                                                                                                                                                       | X |  |   |    | X | All ages | Both |
| Armenia | 2007 | Ministry of Health (Armenia). Armenia Inpatient Care Discharges per 100 2007.                                                                                                                                                                                             |   |  | X |    | X | All ages | Both |
| Armenia | 2007 | Ministry of Health (Armenia). Armenia Outpatient Contacts Per Person Per Year 2007.                                                                                                                                                                                       | X |  |   |    | X | All ages | Both |
| Armenia | 2008 | Ministry of Health (Armenia). Armenia Inpatient Care Discharges per 100 2008.                                                                                                                                                                                             |   |  | X |    | X | All ages | Both |
| Armenia | 2008 | Ministry of Health (Armenia). Armenia Outpatient Contacts Per Person Per Year 2008.                                                                                                                                                                                       | X |  |   |    | X | All ages | Both |
| Armenia | 2009 | Ministry of Health (Armenia). Armenia Inpatient Care Discharges per 100 2009.                                                                                                                                                                                             |   |  | X |    | X | All ages | Both |
| Armenia | 2009 | Ministry of Health (Armenia). Armenia Outpatient Contacts Per Person Per Year 2009.                                                                                                                                                                                       | X |  |   |    | X | All ages | Both |
| Armenia | 2010 | Armenian Sociological Association, Concluzia-Prim Center for Survey Methodology (Moldova), Institute for Advanced Studies (Austria), London School of Hygiene and Tropical Medicine, University of Aberdeen. Armenia Health in Times of Transition Household Survey 2010. |   |  | X | 52 |   | 15-85    | Both |
| Armenia | 2010 | Ministry of Health (Armenia). Armenia Inpatient Care Discharges per 100 2010.                                                                                                                                                                                             |   |  | X |    | X | All ages | Both |
| Armenia | 2010 | Ministry of Health (Armenia). Armenia Outpatient Contacts Per Person Per Year 2010.                                                                                                                                                                                       | X |  |   |    | X | All ages | Both |

|           |                                                                                                                              |                                                                                                                                                                                                                                                                                                 |   |     |   |     |   |          |      |
|-----------|------------------------------------------------------------------------------------------------------------------------------|-------------------------------------------------------------------------------------------------------------------------------------------------------------------------------------------------------------------------------------------------------------------------------------------------|---|-----|---|-----|---|----------|------|
| Armenia   | 2011                                                                                                                         | Ministry of Health (Armenia). Armenia Inpatient Care Discharges per 100 2011.                                                                                                                                                                                                                   |   |     | X |     | X | All ages | Both |
| Armenia   | 2011                                                                                                                         | Ministry of Health (Armenia). Armenia Outpatient Contacts Per Person Per Year 2011.                                                                                                                                                                                                             | X |     |   |     | X | All ages | Both |
| Armenia   | 2012                                                                                                                         | Ministry of Health (Armenia). Armenia Inpatient Care Discharges per 100 2012.                                                                                                                                                                                                                   |   |     | X |     | X | All ages | Both |
| Armenia   | 2012                                                                                                                         | Ministry of Health (Armenia). Armenia Outpatient Contacts Per Person Per Year 2012.                                                                                                                                                                                                             | X |     |   |     | X | All ages | Both |
| Armenia   | 2013                                                                                                                         | Ministry of Health (Armenia). Armenia Inpatient Care Discharges per 100 2013.                                                                                                                                                                                                                   |   |     | X |     | X | All ages | Both |
| Armenia   | 2013                                                                                                                         | Ministry of Health (Armenia). Armenia Outpatient Contacts Per Person Per Year 2013.                                                                                                                                                                                                             | X |     |   |     | X | All ages | Both |
| Armenia   | 2014                                                                                                                         | Ministry of Health (Armenia). Armenia Inpatient Care Discharges per 100 2014.                                                                                                                                                                                                                   |   |     | X |     | X | All ages | Both |
| Armenia   | 2014                                                                                                                         | Ministry of Health (Armenia). Armenia Outpatient Contacts Per Person Per Year 2014.                                                                                                                                                                                                             | X |     |   |     | X | All ages | Both |
| Australia | 1995                                                                                                                         | Australian Bureau of Statistics. Australia National Health Survey 1995. Canberra, Australia: Australian Bureau of Statistics.                                                                                                                                                                   | X | 2   | X | 2   |   | All ages | Both |
| Australia | 2000                                                                                                                         | TQA Research, World Health Organization (WHO). Australia WHO Multi-country Survey Study on Health and Health System Responsiveness 2000-2001. Geneva, Switzerland: World Health Organization (WHO).                                                                                             | X | 4.3 | X | 4.3 |   | 15-100+  | Both |
| Australia | 2001, 2002, 2003, 2004, 2005, 2006, 2007, 2008, 2009, 2010, 2011, 2012, 2013, 2014, 2015, 2016                               | Organization for Economic Co-operation and Development (OECD). OECD Health Statistics. Paris, France: Organization for Economic Co-operation and Development (OECD).                                                                                                                            | X |     |   |     | X | All ages | Both |
| Australia | 2005                                                                                                                         | Centre for Health Promotion Studies, National University of Ireland, Galway, Health Promotion Unit, Department of Health and Children (Ireland). Ireland Survey of Lifestyle Attitudes and Nutrition 1998. Dublin, Ireland: Health Promotion Unit, Department of Health and Children (Ireland). | X | 2   | X | 2   |   | All ages | Both |
| Australia | 2011                                                                                                                         | ISSP Research Group (2009): International Social Survey Programme: Health and Health Care - ISSP 2011. GESIS Data Archive, Cologne. ZA5800 Data file version 3.0.0, doi:10.4232/1.12252.                                                                                                        | X | 52  |   |     |   | All ages | Both |
| Austria   | 1989, 1990, 1991, 1992, 1993, 1994, 1995, 1996, 1997, 1998, 1999, 2001, 2002, 2003, 2004, 2005, 2006, 2007, 2009, 2010, 2011 | World Health Organization Regional Office for Europe (WHO/Europe). European Hospital Morbidity Database 1999-2007. Copenhagen, Denmark: World Health Organization Regional Office for Europe (WHO/Europe).                                                                                      |   |     | X |     | X | All ages | Both |
| Austria   | 1989                                                                                                                         | Federal Ministry of Health (Austria), Statistics Austria. Austria Hospital Inpatient Discharges 1989. Vienna, Austria: Statistics Austria.                                                                                                                                                      |   |     | X |     | X | All ages | Both |
| Austria   | 1999                                                                                                                         |                                                                                                                                                                                                                                                                                                 | X |     |   |     | X | All ages | Both |
| Austria   | 2000                                                                                                                         | Statistics Austria, World Health Organization (WHO). Austria WHO Multi-country Survey Study on Health and Health System Responsiveness 2000-2001. Geneva, Switzerland: World Health Organization (WHO).                                                                                         | X | 4.3 | X | 4.3 |   | All ages | Both |
| Austria   | 2000                                                                                                                         |                                                                                                                                                                                                                                                                                                 | X |     |   |     | X | All ages | Both |
| Austria   | 2001, 2002, 2003, 2004, 2005, 2006, 2007, 2008, 2009, 2010, 2011, 2012, 2013,                                                | Organization for Economic Co-operation and Development (OECD). OECD Health Statistics. Paris, France: Organization for Economic Co-operation and Development (OECD).                                                                                                                            | X |     |   |     | X | All ages | Both |

|            |                                                                                                                                                                                          |                                                                                                                                                                                                                                                                                      |   |     |   |     |   |          |      |
|------------|------------------------------------------------------------------------------------------------------------------------------------------------------------------------------------------|--------------------------------------------------------------------------------------------------------------------------------------------------------------------------------------------------------------------------------------------------------------------------------------|---|-----|---|-----|---|----------|------|
|            | 2014, 2015                                                                                                                                                                               |                                                                                                                                                                                                                                                                                      |   |     |   |     |   |          |      |
| Austria    | 2003                                                                                                                                                                                     | World Health Organization (WHO). Austria World Health Survey 2003. Geneva, Switzerland: World Health Organization (WHO), 2005.                                                                                                                                                       |   |     | X | 52  |   | 0-95     | Both |
| Austria    | 2006                                                                                                                                                                                     | Börsch-Supan, A. (2013). Survey of Health, Ageing and Retirement in Europe (SHARE) Wave 1. Release version: 2.6.0. SHARE-ERIC. Data set. DOI: 10.6103/SHARE.w1.260                                                                                                                   | X | 52  | X | 52  |   | All ages | Both |
| Austria    | 2010                                                                                                                                                                                     | Börsch-Supan, A. (2013). Survey of Health, Ageing and Retirement in Europe (SHARE) Wave 2. Release version: 2.6.0. SHARE-ERIC. Data set. DOI: 10.6103/SHARE.w2.260                                                                                                                   | X | 52  | X | 52  |   | 35-100+  | Both |
| Austria    | 2012                                                                                                                                                                                     | Börsch-Supan, A. (2013). Survey of Health, Ageing and Retirement in Europe (SHARE) Wave 4. Release version: 1.1.1. SHARE-ERIC. Data set. DOI: 10.6103/SHARE.w4.111                                                                                                                   | X | 52  | X | 52  |   | 35-100+  | Both |
| Austria    | 2013                                                                                                                                                                                     | Federal Ministry of Health (Austria), Statistics Austria. Austria Hospital Inpatient Discharges 2013. Vienna, Austria: Statistics Austria.                                                                                                                                           |   |     | X |     | X | All ages | Both |
| Austria    | 2013                                                                                                                                                                                     | Börsch-Supan, A. (2015). Survey of Health, Ageing and Retirement in Europe (SHARE) Wave 5. Release version: 1.0.0. SHARE-ERIC. Data set. DOI: 10.6103/SHARE.w5.100                                                                                                                   | X | 52  | X | 52  |   | All ages | Both |
| Austria    | 2014                                                                                                                                                                                     | Federal Ministry of Health (Austria), Statistics Austria. Austria Hospital Inpatient Discharges 2014. Vienna, Austria: Statistics Austria.                                                                                                                                           |   |     | X |     | X | All ages | Both |
| Azerbaijan | 1981, 1986, 1987, 1988, 1989, 1990, 1991, 1992, 1993, 1994, 1995, 1997, 1998, 1999, 2000, 2001, 2002, 2003, 2004, 2005, 2006, 2007, 2008, 2009, 2010, 2011, 2012, 2013, 2014, 2015, 2016 | World Health Organization Regional Office for Europe (WHO/Europe). European Health for All Database - Inpatient Care Discharges Per 100. Copenhagen, Denmark: World Health Organization Regional Office for Europe (WHO/Europe).                                                     |   |     | X |     | X | All ages | Both |
| Azerbaijan | 1999, 2000, 2001, 2002, 2003, 2004, 2005, 2006, 2007, 2008, 2009, 2010, 2011, 2012, 2013, 2014                                                                                           | World Health Organization Regional Office for Europe (WHO/Europe). European Health for All Database - Outpatient Contacts Per Person Per Year. Copenhagen, Denmark: World Health Organization Regional Office for Europe (WHO/Europe).                                               | X |     |   |     | X | All ages | Both |
| Azerbaijan | 2010                                                                                                                                                                                     | Concluzia-Prim Center for Survey Methodology (Moldova), Institute for Advanced Studies (Austria), London School of Hygiene and Tropical Medicine, STAR Research and Consulting (Azerbaijan), University of Aberdeen. Azerbaijan Health in Times of Transition Household Survey 2010. |   |     | X | 52  |   | 15-85    | Both |
| Bahrain    | 1995                                                                                                                                                                                     | Ministry of Health (Bahrain), Council of Health Ministers of GCC States. Bahrain Family Health Survey 1995. Manama, Bahrain: Ministry of Health (Bahrain).                                                                                                                           | X | 2   |   |     |   | All ages | Both |
| Bahrain    | 2000                                                                                                                                                                                     | Gallup Europe, World Health Organization (WHO). Bahrain WHO Multi-country Survey Study on Health and Health System Responsiveness 2000-2001. Geneva, Switzerland: World Health Organization (WHO).                                                                                   | X | 4.3 | X | 4.3 |   | 15-95    | Both |
| Bangladesh | 2003                                                                                                                                                                                     | World Health Organization (WHO). Bangladesh World Health Survey 2003. Geneva, Switzerland: World Health Organization (WHO), 2005.                                                                                                                                                    |   |     | X | 52  |   | All ages | Both |

|          |                                                                                                      |                                                                                                                                                                                                                                                                                                                                                                                                                                                                         |   |      |   |      |          |      |
|----------|------------------------------------------------------------------------------------------------------|-------------------------------------------------------------------------------------------------------------------------------------------------------------------------------------------------------------------------------------------------------------------------------------------------------------------------------------------------------------------------------------------------------------------------------------------------------------------------|---|------|---|------|----------|------|
| Barbados | 1999                                                                                                 | Pan American Health Organization (PAHO), Center for Demography and Ecology, University of Wisconsin-Madison, Inter-University Consortium for Political and Social Research (ICPSR), Chronic Disease Research Centre (CDRC), University of the West Indies, Barbados - Bridgetown Survey on Health, Well-Being, and Aging in Latin America and the Caribbean 1999-2000. Ann Arbor, United States: Inter-University Consortium for Political and Social Research (ICPSR). | X | 17.2 | X | 17.2 | 60-100+  | Both |
| Belarus  | 1999, 2000, 2001, 2002, 2003, 2004, 2005, 2006, 2007, 2008, 2009, 2010, 2011, 2012, 2013, 2014, 2015 | World Health Organization Regional Office for Europe (WHO/Europe), European Health for All Database - Outpatient Contacts Per Person Per Year. Copenhagen, Denmark: World Health Organization Regional Office for Europe (WHO/Europe).                                                                                                                                                                                                                                  | X |      |   | X    | All ages | Both |
| Belarus  | 2010                                                                                                 | Belarusian State University, Concluza-Prim Center for Survey Methodology (Moldova), Institute for Advanced Studies (Austria), London School of Hygiene and Tropical Medicine, University of Aberdeen, Belarus Health in Times of Transition Household Survey 2010.                                                                                                                                                                                                      |   |      | X | 52   | 15-90    | Both |
| Belgium  | 1998                                                                                                 | National Institute for Health and Disability Insurance (Belgium). Belgium Outpatient Contacts Per Person Per Year 1998.                                                                                                                                                                                                                                                                                                                                                 | X |      |   | X    | All ages | Both |
| Belgium  | 1999                                                                                                 | National Institute for Health and Disability Insurance (Belgium). Belgium Outpatient Contacts Per Person Per Year 1999.                                                                                                                                                                                                                                                                                                                                                 | X |      |   | X    | All ages | Both |
| Belgium  | 2000                                                                                                 | International Research Associates (INRA) Europe, World Health Organization (WHO). Belgium WHO Multi-country Survey Study on Health and Health System Responsiveness 2000-2001. Geneva, Switzerland: World Health Organization (WHO).                                                                                                                                                                                                                                    | X | 4.3  | X | 4.3  | 15-95    | Both |
| Belgium  | 2000                                                                                                 | Federal Public Service Health, Food Chain Safety, and Environment (Belgium). Belgium Minimum Clinical Summary 2000.                                                                                                                                                                                                                                                                                                                                                     |   |      | X |      | All ages | Both |
| Belgium  | 2001, 2002, 2003, 2004, 2005, 2006, 2007, 2008, 2009, 2010, 2011, 2012                               | Organization for Economic Co-operation and Development (OECD). OECD Health Statistics. Paris, France: Organization for Economic Co-operation and Development (OECD).                                                                                                                                                                                                                                                                                                    | X |      |   | X    | All ages | Both |
| Belgium  | 2001                                                                                                 | Federal Public Service Health, Food Chain Safety, and Environment (Belgium). Belgium Minimum Clinical Summary 2001.                                                                                                                                                                                                                                                                                                                                                     |   |      | X |      | All ages | Both |
| Belgium  | 2002, 2003, 2007                                                                                     | World Health Organization Regional Office for Europe (WHO/Europe), European Hospital Morbidity Database 1999-2007. Copenhagen, Denmark: World Health Organization Regional Office for Europe (WHO/Europe).                                                                                                                                                                                                                                                              |   |      | X | X    | All ages | Both |
| Belgium  | 2002                                                                                                 | World Health Organization (WHO), Belgium World Health Survey 2002. Geneva, Switzerland: World Health Organization (WHO), 2005.                                                                                                                                                                                                                                                                                                                                          |   |      | X | 52   | All ages | Both |
| Belgium  | 2002                                                                                                 | Federal Public Service Health, Food Chain Safety, and Environment (Belgium). Belgium Minimum Clinical Summary 2002.                                                                                                                                                                                                                                                                                                                                                     |   |      | X | X    | All ages | Both |
| Belgium  | 2005                                                                                                 | Federal Public Service Health, Food Chain Safety, and Environment (Belgium). Belgium Minimum Clinical Summary 2005.                                                                                                                                                                                                                                                                                                                                                     |   |      | X | X    | All ages | Both |
| Belgium  | 2006                                                                                                 | Börsch-Supan, A. (2013). Survey of Health, Ageing and Retirement in Europe (SHARE) Wave 1. Release version: 2.6.0. SHARE-ERIC. Data set. DOI: 10.6103/SHARE.w1.260                                                                                                                                                                                                                                                                                                      | X | 52   | X | 52   | All ages | Both |
| Belgium  | 2006                                                                                                 | Federal Public Service Health, Food Chain Safety, and Environment (Belgium). Belgium Minimum Clinical Summary 2006.                                                                                                                                                                                                                                                                                                                                                     |   |      | X | X    | All ages | Both |
| Belgium  | 2007                                                                                                 | Federal Public Service Health, Food Chain Safety, and Environment (Belgium). Belgium Minimum Clinical Summary 2007.                                                                                                                                                                                                                                                                                                                                                     |   |      | X | X    | All ages | Both |
| Belgium  | 2010                                                                                                 | Börsch-Supan, A. (2013). Survey of Health, Ageing and Retirement in Europe (SHARE) Wave 2. Release version: 2.6.0. SHARE-ERIC. Data set. DOI: 10.6103/SHARE.w2.260                                                                                                                                                                                                                                                                                                      | X | 52   | X | 52   | 30-100+  | Both |
| Belgium  | 2010                                                                                                 | Federal Public Service Health, Food Chain Safety, and Environment (Belgium). Belgium Minimum Hospital Summary 2010.                                                                                                                                                                                                                                                                                                                                                     |   |      | X | X    | All ages | Both |
| Belgium  | 2011                                                                                                 | ISSP Research Group (2009): International Social Survey Programme: Health and Health Care - ISSP 2011. GESIS Data Archive, Cologne. ZA5800 Data file version 3.0.0, doi:10.4232/1.12252.                                                                                                                                                                                                                                                                                | X | 52   |   |      | 0-95     | Both |
| Belgium  | 2011                                                                                                 | Federal Public Service Health, Food Chain Safety, and Environment (Belgium). Belgium Minimum Hospital Summary 2011.                                                                                                                                                                                                                                                                                                                                                     |   |      | X | X    | All ages | Both |

|                        |                                                                                    |                                                                                                                                                                                                                                                                                                                                                                                                                                                                                         |   |     |   |    |   |          |      |
|------------------------|------------------------------------------------------------------------------------|-----------------------------------------------------------------------------------------------------------------------------------------------------------------------------------------------------------------------------------------------------------------------------------------------------------------------------------------------------------------------------------------------------------------------------------------------------------------------------------------|---|-----|---|----|---|----------|------|
| Belgium                | 2012                                                                               | Börsch-Supan, A. (2013). Survey of Health, Ageing and Retirement in Europe (SHARE) Wave 4. Release version: 1.1.1. SHARE-ERIC. Data set. DOI: 10.6103/SHARE.w4.111                                                                                                                                                                                                                                                                                                                      | X | 52  | X | 52 |   | 40-100+  | Both |
| Belgium                | 2012                                                                               | Federal Public Service Health, Food Chain Safety, and Environment (Belgium). Belgium Minimum Hospital Summary 2012.                                                                                                                                                                                                                                                                                                                                                                     |   |     | X |    | X | All ages | Both |
| Belgium                | 2013                                                                               | Börsch-Supan, A. (2015). Survey of Health, Ageing and Retirement in Europe (SHARE) Wave 5. Release version: 1.0.0. SHARE-ERIC. Data set. DOI: 10.6103/SHARE.w5.100                                                                                                                                                                                                                                                                                                                      | X | 52  | X | 52 |   | All ages | Both |
| Belgium                | 2013                                                                               | Federal Public Service Health, Food Chain Safety, and Environment (Belgium). Belgium Minimum Hospital Summary 2013.                                                                                                                                                                                                                                                                                                                                                                     |   |     | X |    | X | All ages | Both |
| Bhutan                 | 2003                                                                               | National Statistics Bureau (Bhutan). Bhutan Living Standards Survey 2003.                                                                                                                                                                                                                                                                                                                                                                                                               | X | 4   |   |    |   | All ages | Both |
| Bolivia                | 1992                                                                               | National Institute of Statistics (Bolivia). Bolivia Integrated Household Survey 1992. La Paz, Bolivia: National Institute of Statistics (Bolivia).                                                                                                                                                                                                                                                                                                                                      | X | 4.3 |   |    |   | All ages | Both |
| Bolivia                | 1994                                                                               | National Institute of Statistics (Bolivia). Bolivia Integrated Household Survey 1994. La Paz, Bolivia: National Institute of Statistics (Bolivia).                                                                                                                                                                                                                                                                                                                                      | X | 4.3 |   |    |   | All ages | Both |
| Bolivia                | 1999                                                                               | National Institute of Statistics (Bolivia), World Bank (WB), Inter-American Development Bank (IDB), United Nations Economic Commission for Latin America and the Caribbean (CEPAL). Bolivia Household Survey 1999. La Paz, Bolivia: National Institute of Statistics (Bolivia).                                                                                                                                                                                                         | X | 4   |   |    |   | All ages | Both |
| Bolivia                | 2001                                                                               | National Institute of Statistics (Bolivia), World Bank (WB), Inter-American Development Bank (IDB), United Nations Economic Commission for Latin America and the Caribbean (CEPAL). Bolivia Household Survey 2001. La Paz, Bolivia: National Institute of Statistics (Bolivia).                                                                                                                                                                                                         | X | 4   |   |    |   | All ages | Both |
| Bolivia                | 2002                                                                               | National Institute of Statistics (Bolivia), World Bank (WB). Bolivia Household Survey 2002. La Paz, Bolivia: National Institute of Statistics (Bolivia).                                                                                                                                                                                                                                                                                                                                | X | 4   |   |    |   | All ages | Both |
| Bolivia                | 2003                                                                               | National Institute of Statistics (Bolivia). Bolivia Household Survey 2003-2004. La Paz, Bolivia: National Institute of Statistics (Bolivia).                                                                                                                                                                                                                                                                                                                                            | X | 4   |   |    |   | All ages | Both |
| Bolivia                | 2009                                                                               | National Institute of Statistics (Bolivia). Bolivia Household Survey 2009. La Paz, Bolivia: National Institute of Statistics (Bolivia).                                                                                                                                                                                                                                                                                                                                                 | X | 4   |   |    |   | All ages | Both |
| Bosnia and Herzegovina | 2001                                                                               | Agency for Statistics (Bosnia and Herzegovina), Institute of Statistics (Republic of Srpska), Federal Office of Statistics (Bosnia and Herzegovina), Swedish International Development Agency (SIDA), UK Department for International Development (DFID), United Nations Development Programme (UNDP), European Commission (EC), Government of Japan, World Bank (WB). Bosnia and Herzegovina Living Standards Measurement Survey 2001. Washington, DC, United States: World Bank (WB). | X | 4   | X | 52 |   | All ages | Both |
| Bosnia and Herzegovina | 2002                                                                               | Agency for Statistics (Bosnia and Herzegovina), Institute of Statistics (Republic of Srpska), Federal Office of Statistics (Bosnia and Herzegovina), Independent Bureau for Humanitarian Issues (IBHI), Birks Sinclair and Associates, LTD, Institute for Social and Economic Research, University of Essex. Bosnia and Herzegovina Living Standards Measurement Survey 2002. Washington, DC, United States: World Bank (WB).                                                           | X | 52  | X | 52 |   | 1-100+   | Both |
| Bosnia and Herzegovina | 2003                                                                               | World Health Organization (WHO). Bosnia and Herzegovina World Health Survey 2003. Geneva, Switzerland: World Health Organization (WHO), 2005.                                                                                                                                                                                                                                                                                                                                           |   |     | X | 52 |   | 15-85    | Both |
| Bosnia and Herzegovina | 2004                                                                               | Agency for Statistics (Bosnia and Herzegovina), Birks Sinclair and Associates, LTD, Federal Office of Statistics (Federation of Bosnia and Herzegovina), Independent Bureau for Humanitarian Issues (IBHI), Institute for Social and Economic Research, University of Essex, Institute of Statistics (Republic of Srpska). Bosnia and Herzegovina Living Standards Measurement Survey 2004-2005.                                                                                        | X | 52  |   |    |   | 15-100+  | Both |
| Brazil                 | 1996                                                                               | Brazilian Institute of Geography and Statistics (IBGE), World Bank (WB). Brazil Living Standards Measurement Survey 1996-1997. Washington DC, United States: World Bank (WB).                                                                                                                                                                                                                                                                                                           | X | 4.3 |   |    |   | All ages | Both |
| Brazil                 | 2001, 2002, 2003, 2004, 2005, 2006, 2007, 2008, 2009, 2010, 2011, 2012, 2013, 2014 | Organization for Economic Co-operation and Development (OECD). OECD Health Statistics. Paris, France: Organization for Economic Co-operation and Development (OECD).                                                                                                                                                                                                                                                                                                                    | X |     |   |    | X | All ages | Both |
| Brazil                 | 2003                                                                               | Center for Scientific and Technological Information, Oswaldo Cruz Foundation and World Health Organization (WHO). Brazil World Health Survey 2003. Geneva, Switzerland: World Health Organization (WHO), 2005.                                                                                                                                                                                                                                                                          |   |     | X | 52 |   | 15-100+  | Both |
| Brazil                 | 2003, 2008                                                                         | Health Institute (São Paulo, Brazil), State University of Campinas, São Paulo Municipal Health Department, São Paulo State University, University of São Paulo. Brazil - São Paulo Health Survey 2008-2009.                                                                                                                                                                                                                                                                             |   |     | X | 52 |   | All ages | Both |

|              |                                                                                                                                                                                                                  |                                                                                                                                                                                                                                                                 |   |     |   |     |   |          |      |
|--------------|------------------------------------------------------------------------------------------------------------------------------------------------------------------------------------------------------------------|-----------------------------------------------------------------------------------------------------------------------------------------------------------------------------------------------------------------------------------------------------------------|---|-----|---|-----|---|----------|------|
| Brazil       | 2013                                                                                                                                                                                                             | Brazilian Institute of Geography and Statistics (IBGE), Ministry of Health (Brazil), Ministry of Planning, Budget, and Management (Brazil). Brazil National Health Survey 2013. Rio de Janeiro, Brazil: Brazilian Institute of Geography and Statistics (IBGE). | X | 52  | X | 52  |   | All ages | Both |
| Brunei       | 2001                                                                                                                                                                                                             | Department of Economic Planning and Development (Brunei Darussalam). Brunei Population and Housing Census 2001.                                                                                                                                                 | X | 4.3 |   |     |   | All ages | Both |
| Bulgaria     | 1981, 1982, 1983, 1984, 1985, 1986, 1987, 1988, 1989, 1990, 1991, 1992, 1993, 1994, 1995, 1996, 1997, 1998, 1999, 2000, 2001, 2002, 2003, 2004, 2005, 2006, 2007, 2008, 2009, 2010, 2011, 2012, 2013, 2014, 2015 | World Health Organization Regional Office for Europe (WHO/Europe). European Health for All Database - Inpatient Care Discharges Per 100. Copenhagen, Denmark: World Health Organization Regional Office for Europe (WHO/Europe).                                |   |     | X |     | X | All ages | Both |
| Bulgaria     | 1995                                                                                                                                                                                                             | Gallup International, World Bank (WB). Bulgaria Living Standards Measurement Survey 1995. Washington, DC, United States: World Bank (WB).                                                                                                                       | X | 4   |   |     |   | All ages | Both |
| Bulgaria     | 1997                                                                                                                                                                                                             | Gallup International, World Bank (WB). Bulgaria Living Standards Measurement Survey 1997. Washington, DC, United States: World Bank (WB).                                                                                                                       | X | 4   |   |     |   | All ages | Both |
| Bulgaria     | 2000                                                                                                                                                                                                             | International Research Associates (INRA) Europe, World Health Organization (WHO). Bulgaria WHO Multi-country Survey Study on Health and Health System Responsiveness 2000-2001. Geneva, Switzerland: World Health Organization (WHO).                           | X | 4.3 | X | 4.3 |   | 15-90    | Both |
| Bulgaria     | 2001                                                                                                                                                                                                             | TNS BBSS, World Bank. Bulgaria Living Standards Measurement Survey 2001. Washington DC, United States: World Bank.                                                                                                                                              | X | 4   | X | 4   |   | All ages | Both |
| Bulgaria     | 2003                                                                                                                                                                                                             | National Statistical Institute of Bulgaria. Bulgaria Living Standards Measurement Survey 2003. Washington DC, United States: World Bank.                                                                                                                        | X | 52  | X | 52  |   | All ages | Both |
| Bulgaria     | 2007                                                                                                                                                                                                             | Ministry of Labor and Social Policy (Bulgaria), National Statistical Institute of Bulgaria, TNS Gallup, World Bank. Bulgaria Multitopic Household Survey 2007. Washington DC, United States: World Bank.                                                        | X | 52  | X | 52  |   | All ages | Both |
| Bulgaria     | 2011                                                                                                                                                                                                             | ISSP Research Group (2009): International Social Survey Programme: Health and Health Care - ISSP 2011. GESIS Data Archive, Cologne. ZA5800 Data file version 3.0.0, doi:10.4232/1.12252.                                                                        | X | 52  |   |     |   | 15-95    | Both |
| Burkina Faso | 2002                                                                                                                                                                                                             | World Health Organization (WHO). Burkina Faso World Health Survey 2002-2003. Geneva, Switzerland: World Health Organization (WHO), 2005.                                                                                                                        |   |     | X | 52  |   | All ages | Both |
| Burkina Faso | 2003                                                                                                                                                                                                             | National Institute of Statistics and Demography (Burkina Faso), World Bank. Burkina Faso Core Welfare Indicators Questionnaire Survey 2003. Ouagadougou, Burkina Faso: National Institute of Statistics and Demography (Burkina Faso).                          | X | 4   |   |     |   | All ages | Both |
| Burkina Faso | 2014                                                                                                                                                                                                             | National Institute of Statistics and Demography (Burkina Faso), World Bank. Burkina Faso Continuous Multisectoral Survey 2014. Washington DC, United States: World Bank.                                                                                        | X | 4   |   |     |   | All ages | Both |
| Burundi      | 1998                                                                                                                                                                                                             | Burundi Institute of Statistics and Economic Studies. Burundi Priority Survey 1998-1999.                                                                                                                                                                        | X | 2   |   |     |   | All ages | Both |
| Burundi      | 2002                                                                                                                                                                                                             | Burundi Institute of Statistics and Economic Studies. Burundi Survey on Indicators of Development 2002.                                                                                                                                                         | X | 4   |   |     |   | All ages | Both |
| Cambodia     | 2003                                                                                                                                                                                                             | National Institute of Statistics (Cambodia), Statistics Sweden. Cambodia Socio-Economic Survey 2003-2005. Phnom Penh, Cambodia: National Institute of Statistics (Cambodia).                                                                                    | X | 4   | X | 4   |   | All ages | Both |
| Cambodia     | 2006                                                                                                                                                                                                             | National Institute of Statistics (Cambodia), Statistics Sweden. Cambodia Socio-Economic Survey 2006-2007. Phnom Penh, Cambodia: National Institute of Statistics (Cambodia).                                                                                    | X | 4   | X | 4   |   | All ages | Both |
| Cambodia     | 2007                                                                                                                                                                                                             | National Institute of Statistics (Cambodia), Statistics Sweden. Cambodia Socio-Economic Survey 2007-2008. Phnom Penh, Cambodia: National Institute of Statistics (Cambodia).                                                                                    | X | 4.3 | X | 4.3 |   | All ages | Both |

|            |                                                                                    |                                                                                                                                                                                                                                                                                                                                                                                                                                                                                                                                                     |   |      |   |      |   |          |      |
|------------|------------------------------------------------------------------------------------|-----------------------------------------------------------------------------------------------------------------------------------------------------------------------------------------------------------------------------------------------------------------------------------------------------------------------------------------------------------------------------------------------------------------------------------------------------------------------------------------------------------------------------------------------------|---|------|---|------|---|----------|------|
| Cambodia   | 2009                                                                               | National Institute of Statistics (Cambodia), Statistics Sweden. Cambodia Socio-Economic Survey 2009. Phnom Penh, Cambodia: National Institute of Statistics (Cambodia).                                                                                                                                                                                                                                                                                                                                                                             | X | 4.3  |   |      |   | All ages | Both |
| Cambodia   | 2010                                                                               | National Institute of Statistics (Cambodia), Statistics Sweden. Cambodia Socio-Economic Survey 2010. Phnom Penh, Cambodia: National Institute of Statistics (Cambodia).                                                                                                                                                                                                                                                                                                                                                                             | X | 4.3  |   |      |   | 0-95     | Both |
| Cambodia   | 2011                                                                               | National Institute of Statistics (Cambodia), Statistics Sweden. Cambodia Socio-Economic Survey 2011. Phnom Penh, Cambodia: National Institute of Statistics (Cambodia).                                                                                                                                                                                                                                                                                                                                                                             | X | 4.3  |   |      |   | 0-95     | Both |
| Cambodia   | 2012                                                                               | Ministry of Planning (Cambodia), National Institute of Statistics (Cambodia). Cambodia Socio-Economic Survey 2012. Phnom Penh, Cambodia: National Institute of Statistics (Cambodia).                                                                                                                                                                                                                                                                                                                                                               | X | 4.3  |   |      |   | All ages | Both |
| Cambodia   | 2013                                                                               | National Institute of Statistics (Cambodia), Statistics Sweden. Cambodia Socio-Economic Survey 2013. Phnom Penh, Cambodia: National Institute of Statistics (Cambodia).                                                                                                                                                                                                                                                                                                                                                                             | X | 4.3  |   |      |   | 0-20     | Both |
| Cambodia   | 2014                                                                               | National Institute of Statistics (Cambodia), Statistics Sweden. Cambodia Socio-Economic Survey 2014. Phnom Penh, Cambodia: National Institute of Statistics (Cambodia).                                                                                                                                                                                                                                                                                                                                                                             | X | 4.3  |   |      |   | All ages | Both |
| Canada     | 2000                                                                               | Statistics Canada. Canada Community Health Survey 2000-2001. Ottawa, Canada: Statistics Canada, 2003.                                                                                                                                                                                                                                                                                                                                                                                                                                               |   |      | X | 52   |   | 10-85    | Both |
| Canada     | 2000                                                                               | EnviroNics Research Group, World Health Organization (WHO). Canada WHO Multi-country Survey Study on Health and Health System Responsiveness 2000-2001. Geneva, Switzerland: World Health Organization (WHO).                                                                                                                                                                                                                                                                                                                                       | X | 4.3  | X | 4.3  |   | 0-95     | Both |
| Canada     | 2001, 2002, 2003, 2004, 2005, 2006, 2007, 2008, 2009, 2010, 2011, 2012, 2013, 2014 | Organization for Economic Co-operation and Development (OECD). OECD Health Statistics. Paris, France: Organization for Economic Co-operation and Development (OECD).                                                                                                                                                                                                                                                                                                                                                                                | X |      |   |      | X | All ages | Both |
| Canada     | 2005                                                                               | Statistics Canada. Canada Community Health Survey 2005. Ottawa, Canada: Statistics Canada.                                                                                                                                                                                                                                                                                                                                                                                                                                                          |   |      | X | 52   |   | 0-85     | Both |
| Canada     | 2007                                                                               | Statistics Canada. Canada Community Health Survey 2007-2008. Ottawa, Canada: Statistics Canada.                                                                                                                                                                                                                                                                                                                                                                                                                                                     |   |      | X | 52   |   | 0-85     | Both |
| Cape Verde | 2007                                                                               | National Institute of Statistics (INE) (Cape Verde) and World Bank (WB). Cape Verde Core Welfare Indicator Questionnaire Survey 2007. Praia, Cape Verde: National Institute of Statistics (INE) (Cape Verde).                                                                                                                                                                                                                                                                                                                                       | X | 4    |   |      |   | All ages | Both |
| Chad       | 2003                                                                               | World Health Organization (WHO). Chad World Health Survey 2003. Geneva, Switzerland: World Health Organization (WHO), 2005.                                                                                                                                                                                                                                                                                                                                                                                                                         |   |      | X | 52   |   | All ages | Both |
| Chile      | 1990                                                                               | Department of Economics, University of Chile, Ministry of Planning (Chile). Chile National Socioeconomic Characterization Survey 1990.                                                                                                                                                                                                                                                                                                                                                                                                              | X | 12.9 |   |      |   | All ages | Both |
| Chile      | 1992                                                                               | Department of Economics, University of Chile, Ministry of Planning (Chile). Chile National Socioeconomic Characterization Survey 1992.                                                                                                                                                                                                                                                                                                                                                                                                              | X | 12.9 | X | 12.9 |   | All ages | Both |
| Chile      | 1994                                                                               | Department of Economics, University of Chile, Ministry of Planning (Chile). Chile National Socioeconomic Characterization Survey 1994. Santiago, Chile: Ministry of Social Development (Chile).                                                                                                                                                                                                                                                                                                                                                     | X | 12.9 | X | 12.9 |   | All ages | Both |
| Chile      | 1996                                                                               | Department of Economics, University of Chile, Ministry of Planning (Chile). Chile National Socioeconomic Characterization Survey 1996. Santiago, Chile: Ministry of Social Development (Chile).                                                                                                                                                                                                                                                                                                                                                     | X | 12.9 | X | 12.9 |   | All ages | Both |
| Chile      | 1998                                                                               | Department of Economics, University of Chile, Ministry of Planning (Chile). Chile National Socioeconomic Characterization Survey 1998.                                                                                                                                                                                                                                                                                                                                                                                                              | X | 12.9 | X | 12.9 |   | All ages | Both |
| Chile      | 1999                                                                               | Pan American Health Organization (PAHO), Center for Demography and Ecology, University of Wisconsin-Madison, Inter-University Consortium for Political and Social Research (ICPSR), Institute of Nutrition and Food Technology (INTA), University of Chile, Center for Geriatrics and Gerontology, Pontifical Catholic University of Chile. Chile - Santiago Survey on Health, Well-Being, and Aging in Latin America and the Caribbean 1999-2000. Ann Arbor, United States: Inter-University Consortium for Political and Social Research (ICPSR). | X | 17.2 | X | 17.2 |   | 60-100+  | Both |
| Chile      | 2000                                                                               | Department of Economics, University of Chile, Ministry of Planning (Chile). Chile National Socioeconomic Characterization Survey 2000. Santiago, Chile: Ministry of Social Development (Chile).                                                                                                                                                                                                                                                                                                                                                     | X | 12.9 | X | 52   |   | All ages | Both |
| Chile      | 2000                                                                               | Ministry of Health (Chile), National Institute of Statistics (Chile). Chile National Quality of Life and Health Survey 2000. Santiago, Chile: Ministry of Health (Chile).                                                                                                                                                                                                                                                                                                                                                                           | X | 4.3  |   |      |   | All ages | Both |
| Chile      | 2000                                                                               | University of Concepcion (Chile), World Health Organization (WHO), Chile WHO Multi-country Survey Study on Health and Health System Responsiveness 2000-2001. Geneva, Switzerland: World Health Organization (WHO).                                                                                                                                                                                                                                                                                                                                 | X | 4.3  | X | 4.3  |   | All ages | Both |

|       |                                                                                                                                                      |                                                                                                                                                                                                                                                                            |   |      |   |    |   |          |      |
|-------|------------------------------------------------------------------------------------------------------------------------------------------------------|----------------------------------------------------------------------------------------------------------------------------------------------------------------------------------------------------------------------------------------------------------------------------|---|------|---|----|---|----------|------|
| Chile | 2001, 2002, 2003, 2004, 2005, 2006, 2007, 2008, 2009, 2010, 2011, 2012, 2013, 2014                                                                   | Organization for Economic Co-operation and Development (OECD). OECD Health Statistics. Paris, France: Organization for Economic Co-operation and Development (OECD).                                                                                                       | X |      |   |    | X | All ages | Both |
| Chile | 2001                                                                                                                                                 | Ministry of Health (Chile). Chile Hospital Discharges 2001. Santiago, Chile: Ministry of Health (Chile).                                                                                                                                                                   |   |      | X |    | X | 0-99     | Both |
| Chile | 2002                                                                                                                                                 | Ministry of Health (Chile). Chile Hospital Discharges 2002. Santiago, Chile: Ministry of Health (Chile).                                                                                                                                                                   |   |      | X |    | X | 0-99     | Both |
| Chile | 2003                                                                                                                                                 | Department of Economics, University of Chile, Ministry of Planning (Chile). Chile National Socioeconomic Characterization Survey 2003. Santiago, Chile: Ministry of Social Development (Chile).                                                                            | X | 12.9 | X | 52 |   | All ages | Both |
| Chile | 2003                                                                                                                                                 | Ministry of Health (Chile). Chile Hospital Discharges 2003. Santiago, Chile: Ministry of Health (Chile).                                                                                                                                                                   |   |      | X |    | X | 0-99     | Both |
| Chile | 2004                                                                                                                                                 | Ministry of Health (Chile). Chile Hospital Discharges 2004. Santiago, Chile: Ministry of Health (Chile).                                                                                                                                                                   |   |      | X |    | X | 0-99     | Both |
| Chile | 2005                                                                                                                                                 | Ministry of Health (Chile). Chile Hospital Discharges 2005. Santiago, Chile: Ministry of Health (Chile).                                                                                                                                                                   |   |      | X |    | X | 0-99     | Both |
| Chile | 2006                                                                                                                                                 | Department of Economics, University of Chile, Ministry of Planning (Chile). Chile National Socioeconomic Characterization Survey 2006. Santiago, Chile: Ministry of Social Development (Chile).                                                                            | X | 12.9 | X | 52 |   | All ages | Both |
| Chile | 2006                                                                                                                                                 | Ministry of Health (Chile). Chile Hospital Discharges 2006. Santiago, Chile: Ministry of Health (Chile).                                                                                                                                                                   |   |      | X |    | X | 0-99     | Both |
| Chile | 2007                                                                                                                                                 | Ministry of Health (Chile). Chile Hospital Discharges 2007. Santiago, Chile: Ministry of Health (Chile).                                                                                                                                                                   |   |      | X |    | X | 0-99     | Both |
| Chile | 2008                                                                                                                                                 | Ministry of Health (Chile). Chile Hospital Discharges 2008. Santiago, Chile: Ministry of Health (Chile).                                                                                                                                                                   |   |      | X |    | X | 0-99     | Both |
| Chile | 2009                                                                                                                                                 | Ministry of Health (Chile). Chile Hospital Discharges 2009. Santiago, Chile: Ministry of Health (Chile).                                                                                                                                                                   |   |      | X |    | X | 0-99     | Both |
| Chile | 2009                                                                                                                                                 | Ministry of Planning (Chile), Social Observatory, Alberto Hurtado University. Chile National Socioeconomic Characterization Survey 2009. Santiago, Chile: Ministry of Social Development (Chile).                                                                          | X | 12.9 | X | 52 |   | All ages | Both |
| Chile | 2010                                                                                                                                                 | Ministry of Health (Chile). Chile Hospital Discharges 2010. Santiago, Chile: Ministry of Health (Chile).                                                                                                                                                                   |   |      | X |    | X | 0-99     | Both |
| Chile | 2011                                                                                                                                                 | Ministry of Health (Chile). Chile Hospital Discharges 2011. Santiago, Chile: Ministry of Health (Chile).                                                                                                                                                                   |   |      | X |    | X | 0-99     | Both |
| Chile | 2011                                                                                                                                                 | ISSP Research Group (2009): International Social Survey Programme: Health and Health Care - ISSP 2011. GESIS Data Archive, Cologne. ZA5800 Data file version 3.0.0, doi:10.4232/1.12252.                                                                                   | X | 52   |   |    |   | 15-100+  | Both |
| Chile | 2012                                                                                                                                                 | Ministry of Health (Chile). Chile Hospital Discharges 2012. Santiago, Chile: Ministry of Health (Chile).                                                                                                                                                                   |   |      | X |    | X | 0-99     | Both |
| Chile | 2015                                                                                                                                                 | Microdata Center, Department of Economics, University of Chile, Ministry of Social Development (Chile), National Institute of Statistics (Chile). Chile National Socioeconomic Characterization Survey 2015-2016. Santiago, Chile: Ministry of Social Development (Chile). | X | 12.9 |   |    |   | All ages | Both |
| Chile | 2015                                                                                                                                                 | National Office of Statistics (Cuba). Cuba Statistical Yearbook 2012. Havana, Cuba: National Office of Statistics (Cuba).                                                                                                                                                  |   |      | X | 52 |   | All ages | Both |
| China | 1990, 1991, 1992, 1993, 1994, 1995, 1996, 1997, 1998, 1999, 2000, 2001, 2002, 2003, 2004, 2005, 2006, 2007, 2008, 2009, 2010, 2011, 2012, 2013, 2014 | Organization for Economic Co-operation and Development (OECD). OECD Health Statistics. Paris, France: Organization for Economic Co-operation and Development (OECD).                                                                                                       |   |      | X |    | X | All ages | Both |
| China | 1991, 1993, 1997, 2000,                                                                                                                              | Carolina Population Center, University of North Carolina at Chapel Hill, Chinese Center for Disease Control and Prevention (CCDC). China Health and Nutrition Survey. Chapel Hill,                                                                                         | X | 4    | X | 4  |   | All ages | Both |



|          |                              |                                                                                                                                                                                                                                                                      |   |     |   |     |   |          |      |
|----------|------------------------------|----------------------------------------------------------------------------------------------------------------------------------------------------------------------------------------------------------------------------------------------------------------------|---|-----|---|-----|---|----------|------|
|          | 2004, 2006, 2009             | United States: Carolina Population Center, University of North Carolina at Chapel Hill.                                                                                                                                                                              |   |     |   |     |   |          |      |
| China    | 1996                         | National Bureau of Statistics of China. China Statistical Yearbook 1996. Beijing, China: National Bureau of Statistics of China.                                                                                                                                     | X |     |   |     | X | All ages | Both |
| China    | 1997                         | National Bureau of Statistics of China. China Statistical Yearbook 1997. Beijing, China: National Bureau of Statistics of China.                                                                                                                                     | X |     |   |     | X | All ages | Both |
| China    | 1998                         | National Bureau of Statistics of China. China Statistical Yearbook 2003. Beijing, China: National Bureau of Statistics of China.                                                                                                                                     | X |     |   |     | X | All ages | Both |
| China    | 1999                         | National Bureau of Statistics of China. China Statistical Yearbook 2003. Beijing, China: National Bureau of Statistics of China.                                                                                                                                     | X |     |   |     | X | All ages | Both |
| China    | 2000                         | National Bureau of Statistics of China. China Statistical Yearbook 2003. Beijing, China: National Bureau of Statistics of China.                                                                                                                                     | X |     |   |     | X | All ages | Both |
| China    | 2000                         | Institute of Social Medicine and Health Policy, Shandong University, Shandong University School of Medicine, World Health Organization (WHO). China WHO Multi-country Survey Study on Health and Health System Responsiveness 2000-2001.                             | X | 4.3 | X | 4.3 |   | 0-95     | Both |
| China    | 2001                         | National Bureau of Statistics of China. China Statistical Yearbook 2003. Beijing, China: National Bureau of Statistics of China.                                                                                                                                     | X |     |   |     | X | All ages | Both |
| China    | 2002                         | World Health Organization (WHO). China World Health Survey 2002. Geneva, Switzerland: World Health Organization (WHO), 2005.                                                                                                                                         |   |     | X | 52  |   | 15-100+  | Both |
| China    | 2002                         | National Bureau of Statistics of China. China Statistical Yearbook 2003. Beijing, China: National Bureau of Statistics of China.                                                                                                                                     | X |     |   |     | X | All ages | Both |
| China    | 2003                         | National Bureau of Statistics of China. China Statistical Yearbook 2003. Beijing, China: National Bureau of Statistics of China.                                                                                                                                     | X |     |   |     | X | All ages | Both |
| China    | 2005                         | National Bureau of Statistics of China. China Statistical Yearbook 2005. Beijing, China: National Bureau of Statistics of China.                                                                                                                                     | X |     |   |     | X | All ages | Both |
| China    | 2007                         | Ministry of Health (China), National Center for Chronic and Noncommunicable Disease Control and Prevention (China), World Health Organization (WHO). China WHO Study on Global AGEing and Adult Health 2007-2010.                                                    | X | 52  |   |     |   | All ages | Both |
| China    | 2007                         | National Bureau of Statistics of China. China Statistical Yearbook 2007. Beijing, China: National Bureau of Statistics of China.                                                                                                                                     | X |     |   |     | X | All ages | Both |
| China    | 2008                         | National Bureau of Statistics of China. China Statistical Yearbook 2003. Beijing, China: National Bureau of Statistics of China.                                                                                                                                     | X |     |   |     | X | All ages | Both |
| China    | 2008                         | China Center for Economic Research, Peking University. China Health and Retirement Longitudinal Study 2008. Beijing, China: China Center for Economic Research, Peking University.                                                                                   | X | 4.3 |   |     |   | 30-95    | Both |
| China    | 2012                         | China Center for Economic Research, Peking University. China Health and Retirement Longitudinal Study Pilot Resurvey 2012. Beijing, China: China Center for Economic Research, Peking University.                                                                    | X | 4.3 | X | 52  |   | All ages | Both |
| China    | 2015                         | Institute for Health Metrics and Evaluation (IHME). United States Expenditure by Disease Cost to Payment Estimates 1996-2012.                                                                                                                                        | X |     |   |     | X | All ages | Both |
| China    | 2015                         | National Bureau of Statistics of China. China Statistical Yearbook 2015. Beijing, China: National Bureau of Statistics of China.                                                                                                                                     |   |     | X |     | X | All ages | Both |
| Colombia | 1997                         | National Administrative Department of Statistics (Colombia). Colombia National Quality of Life Survey 1997. Bogotá, Colombia: National Administrative Department of Statistics (Colombia).                                                                           |   |     | X | 52  |   | All ages | Both |
| Colombia | 2000                         | Pontificia Universidad Javeriana (Colombia), World Health Organization (WHO). Colombia WHO Multi-country Survey Study on Health and Health System Responsiveness 2000-2001. Geneva, Switzerland: World Health Organization (WHO).                                    | X | 4.3 | X | 4.3 |   | 15-100+  | Both |
| Colombia | 2007                         | Administrative Department of Science, Technology, and Innovation (Colombia), Center for Development Projects, Pontifical Xavierian University, Ministry of Social Protection (Colombia), Specialized Information Systems. Colombia National Health Survey 2007-2008. | X | 4.3 | X | 52  |   | 5-70     | Both |
| Colombia | 2008                         | National Administrative Department of Statistics (Colombia). Colombia National Quality of Life Survey 2008. Bogotá, Colombia: National Administrative Department of Statistics (Colombia).                                                                           |   |     | X | 52  |   | All ages | Both |
| Colombia | 2009, 2010, 2011, 2012, 2013 | Organization for Economic Co-operation and Development (OECD). OECD Health Statistics. Paris, France: Organization for Economic Co-operation and Development (OECD).                                                                                                 |   |     | X |     | X | All ages | Both |
| Colombia | 2010                         | National Administrative Department of Statistics (Colombia). Colombia National Quality of Life Survey 2010. Bogotá, Colombia: National Administrative Department of Statistics (Colombia), 2012.                                                                     | X | 4.3 | X | 52  |   | All ages | Both |
| Comoros  | 2003                         | World Health Organization (WHO). Comoros World Health Survey 2003. Geneva, Switzerland: World Health Organization (WHO), 2005.                                                                                                                                       |   |     | X | 52  |   | 15-95    | Both |

|                |                                                                                                                                                                                                                  |                                                                                                                                                                                                                                                                                                                                                                                                                                                                                                                    |   |      |   |     |          |      |
|----------------|------------------------------------------------------------------------------------------------------------------------------------------------------------------------------------------------------------------|--------------------------------------------------------------------------------------------------------------------------------------------------------------------------------------------------------------------------------------------------------------------------------------------------------------------------------------------------------------------------------------------------------------------------------------------------------------------------------------------------------------------|---|------|---|-----|----------|------|
| Costa Rica     | 2000                                                                                                                                                                                                             | Gallup Europe, World Health Organization (WHO). Costa Rica WHO Multi-country Survey Study on Health and Health System Responsiveness 2000-2001. Geneva, Switzerland: World Health Organization (WHO).                                                                                                                                                                                                                                                                                                              | X | 4.3  | X | 4.3 | 15-95    | Both |
| Costa Rica     | 2006                                                                                                                                                                                                             | Central American Population Center, University of Costa Rica. Costa Rica Survey of Family Health Services and Expenses 2008. San José, Costa Rica: Central American Population Center, University of Costa Rica.                                                                                                                                                                                                                                                                                                   | X | 52   | X | 52  | All ages | Both |
| Cote d'Ivoire  | 2003                                                                                                                                                                                                             | World Health Organization (WHO). Côte d'Ivoire World Health Survey 2003. Geneva, Switzerland: World Health Organization (WHO), 2005.                                                                                                                                                                                                                                                                                                                                                                               |   |      | X | 52  | All ages | Both |
| Croatia        | 1981, 1982, 1983, 1984, 1985, 1986, 1987, 1988, 1989, 1990, 1991, 1992, 1993, 1994, 1995, 1996, 1997, 1998, 1999, 2000, 2001, 2002, 2003, 2004, 2005, 2006, 2007, 2008, 2009, 2010, 2011, 2012, 2013, 2014, 2015 | World Health Organization Regional Office for Europe (WHO/Europe). European Health for All Database - Inpatient Care Discharges Per 100. Copenhagen, Denmark: World Health Organization Regional Office for Europe (WHO/Europe).                                                                                                                                                                                                                                                                                   |   |      | X | X   | All ages | Both |
| Croatia        | 2000                                                                                                                                                                                                             | Market, Media, and Public Opinion Research (Croatia), World Health Organization (WHO). Croatia WHO Multi-country Survey Study on Health and Health System Responsiveness 2000-2001. Geneva, Switzerland: World Health Organization (WHO).                                                                                                                                                                                                                                                                          | X | 4.3  | X | 4.3 | 15-95    | Both |
| Croatia        | 2003, 2004, 2005, 2006, 2007                                                                                                                                                                                     | World Health Organization Regional Office for Europe (WHO/Europe). European Hospital Morbidity Database 1999-2007. Copenhagen, Denmark: World Health Organization Regional Office for Europe (WHO/Europe).                                                                                                                                                                                                                                                                                                         |   |      | X | X   | All ages | Both |
| Croatia        | 2003                                                                                                                                                                                                             | World Health Organization (WHO). Croatia World Health Survey 2003. Geneva, Switzerland: World Health Organization (WHO), 2005.                                                                                                                                                                                                                                                                                                                                                                                     |   |      | X | 52  | 15-95    | Both |
| Croatia        | 2011                                                                                                                                                                                                             | ISSP Research Group (2009): International Social Survey Programme: Health and Health Care - ISSP 2011. GESIS Data Archive, Cologne. ZA5800 Data file version 3.0.0, doi:10.4232/1.12252.                                                                                                                                                                                                                                                                                                                           | X | 52   |   |     | 0-90     | Both |
| Cuba           | 1999                                                                                                                                                                                                             | Pan American Health Organization (PAHO), Center for Demography and Ecology, University of Wisconsin-Madison, Inter-University Consortium for Political and Social Research (ICPSR), Centre for Population and Development Studies, National Statistics Office (Cuba), Iberoamerican Center for the Third Age. Cuba - Havana Survey on Health, Well-Being, and Aging in Latin America and the Caribbean 1999-2000. Ann Arbor, United States: Inter-University Consortium for Political and Social Research (ICPSR). | X | 17.2 |   |     | 60-100+  | Both |
| Cyprus         | 2000                                                                                                                                                                                                             | MEMRB International, World Health Organization (WHO). Cyprus WHO Multi-country Survey Study on Health and Health System Responsiveness 2000-2001. Geneva, Switzerland: World Health Organization (WHO).                                                                                                                                                                                                                                                                                                            | X | 4.3  | X | 4.3 | All ages | Both |
| Cyprus         | 2011                                                                                                                                                                                                             | World Health Organization Regional Office for Europe (WHO/Europe). European Hospital Morbidity Database 1999-2007. Copenhagen, Denmark: World Health Organization Regional Office for Europe (WHO/Europe).                                                                                                                                                                                                                                                                                                         |   |      | X | X   | All ages | Both |
| Czech Republic | 1998                                                                                                                                                                                                             | Institute of Health Information and Statistics of the Czech Republic. Czech Republic Surveys on Activity of Health Establishments 1998.                                                                                                                                                                                                                                                                                                                                                                            | X |      |   |     | All ages | Both |
| Czech Republic | 1999, 2001, 2002, 2003, 2004, 2005, 2006, 2007, 2009,                                                                                                                                                            | World Health Organization Regional Office for Europe (WHO/Europe). European Hospital Morbidity Database 1999-2007. Copenhagen, Denmark: World Health Organization Regional Office for Europe (WHO/Europe).                                                                                                                                                                                                                                                                                                         |   |      | X | X   | All ages | Both |

|                |            |                                                                                                                                                                                                                                                                                                                   |   |     |   |     |   |          |      |
|----------------|------------|-------------------------------------------------------------------------------------------------------------------------------------------------------------------------------------------------------------------------------------------------------------------------------------------------------------------|---|-----|---|-----|---|----------|------|
|                | 2010, 2011 |                                                                                                                                                                                                                                                                                                                   |   |     |   |     |   |          |      |
| Czech Republic | 1999       | Institute of Health Information and Statistics of the Czech Republic. Czech Republic Surveys on Activity of Health Establishments 1999.                                                                                                                                                                           | X |     |   |     | X | All ages | Both |
| Czech Republic | 2000       | Institute of Health Information and Statistics of the Czech Republic, International Research Associates (INRA) Europe, World Health Organization (WHO). Czech Republic WHO Multi-country Survey Study on Health and Health System Responsiveness 2000-2001. Geneva, Switzerland: World Health Organization (WHO). | X | 4.3 | X | 4.3 |   | 15-90    | Both |
| Czech Republic | 2000       | Institute of Health Information and Statistics of the Czech Republic. Czech Republic Surveys on Activity of Health Establishments 2000.                                                                                                                                                                           | X |     |   |     | X | All ages | Both |
| Czech Republic | 2001       | Institute of Health Information and Statistics of the Czech Republic. Czech Republic Surveys on Activity of Health Establishments 2001.                                                                                                                                                                           | X |     |   |     | X | All ages | Both |
| Czech Republic | 2002       | World Health Organization (WHO). Czech Republic World Health Survey 2002-2003. Geneva, Switzerland: World Health Organization (WHO), 2005.                                                                                                                                                                        |   |     | X | 52  |   | 15-95    | Both |
| Czech Republic | 2002       | Institute of Health Information and Statistics of the Czech Republic. Czech Republic Surveys on Activity of Health Establishments 2002.                                                                                                                                                                           | X |     |   |     | X | All ages | Both |
| Czech Republic | 2003       | Institute of Health Information and Statistics of the Czech Republic. Czech Republic Surveys on Activity of Health Establishments 2003.                                                                                                                                                                           | X |     |   |     | X | All ages | Both |
| Czech Republic | 2004       | Institute of Health Information and Statistics of the Czech Republic. Czech Republic Surveys on Activity of Health Establishments 2004.                                                                                                                                                                           | X |     |   |     | X | All ages | Both |
| Czech Republic | 2005       | Institute of Health Information and Statistics of the Czech Republic. Czech Republic Surveys on Activity of Health Establishments 2005.                                                                                                                                                                           | X |     |   |     | X | All ages | Both |
| Czech Republic | 2006       | Institute of Health Information and Statistics of the Czech Republic. Czech Republic Surveys on Activity of Health Establishments 2006.                                                                                                                                                                           | X |     |   |     | X | All ages | Both |
| Czech Republic | 2007       | Institute of Health Information and Statistics of the Czech Republic. Czech Republic Surveys on Activity of Health Establishments 2007.                                                                                                                                                                           | X |     |   |     | X | All ages | Both |
| Czech Republic | 2008       | Institute of Health Information and Statistics of the Czech Republic. Czech Republic Surveys on Activity of Health Establishments 2008.                                                                                                                                                                           | X |     |   |     | X | All ages | Both |
| Czech Republic | 2009       | Institute of Health Information and Statistics of the Czech Republic. Czech Republic Surveys on Activity of Health Establishments 2009.                                                                                                                                                                           | X |     |   |     | X | All ages | Both |
| Czech Republic | 2010       | Börsch-Supan, A. (2013). Survey of Health, Ageing and Retirement in Europe (SHARE) Wave 2. Release version: 2.6.0. SHARE-ERIC. Data set. DOI: 10.6103/SHARE.w2.260                                                                                                                                                | X | 52  | X | 52  |   | 35-100+  | Both |
| Czech Republic | 2010       | Institute of Health Information and Statistics of the Czech Republic. Czech Republic Surveys on Activity of Health Establishments 2010.                                                                                                                                                                           | X |     |   |     | X | All ages | Both |
| Czech Republic | 2011       | ISSP Research Group (2009): International Social Survey Programme: Health and Health Care - ISSP 2011. GESIS Data Archive, Cologne. ZA5800 Data file version 3.0.0, doi:10.4232/1.12252.                                                                                                                          | X | 52  |   |     |   | 15-95    | Both |
| Czech Republic | 2011       | Institute of Health Information and Statistics of the Czech Republic. Czech Republic Surveys on Activity of Health Establishments 2011.                                                                                                                                                                           | X |     |   |     | X | All ages | Both |
| Czech Republic | 2012       | Börsch-Supan, A. (2013). Survey of Health, Ageing and Retirement in Europe (SHARE) Wave 4. Release version: 1.1.1. SHARE-ERIC. Data set. DOI: 10.6103/SHARE.w4.111                                                                                                                                                | X | 52  | X | 52  |   | All ages | Both |
| Czech Republic | 2012       | Institute of Health Information and Statistics of the Czech Republic. Czech Republic Surveys on Activity of Health Establishments 2012.                                                                                                                                                                           | X |     |   |     | X | All ages | Both |
| Czech Republic | 2013       | Börsch-Supan, A. (2015). Survey of Health, Ageing and Retirement in Europe (SHARE) Wave 5. Release version: 1.0.0. SHARE-ERIC. Data set. DOI: 10.6103/SHARE.w5.100                                                                                                                                                | X | 52  | X | 52  |   | All ages | Both |
| Czech Republic | 2013       | Institute of Health Information and Statistics of the Czech Republic. Czech Republic Surveys on Activity of Health Establishments 2013.                                                                                                                                                                           | X |     |   |     | X | All ages | Both |
| Denmark        | 1979       | Danish Health and Medicines Authority. Denmark National Patient Registry 1979.                                                                                                                                                                                                                                    |   |     | X |     | X | All ages | Both |
| Denmark        | 1980       | Danish Health and Medicines Authority. Denmark National Patient Registry 1980.                                                                                                                                                                                                                                    |   |     | X |     | X | All ages | Both |
| Denmark        | 1981       | Danish Health and Medicines Authority. Denmark National Patient Registry 1981.                                                                                                                                                                                                                                    |   |     | X |     | X | All ages | Both |
| Denmark        | 1982       | Danish Health and Medicines Authority. Denmark National Patient Registry 1982.                                                                                                                                                                                                                                    |   |     | X |     | X | All ages | Both |
| Denmark        | 1983       | Danish Health and Medicines Authority. Denmark National Patient Registry 1983.                                                                                                                                                                                                                                    |   |     | X |     | X | All ages | Both |
| Denmark        | 1984       | Danish Health and Medicines Authority. Denmark National Patient Registry 1984.                                                                                                                                                                                                                                    |   |     | X |     | X | All ages | Both |
| Denmark        | 1985       | Danish Health and Medicines Authority. Denmark National Patient Registry 1985.                                                                                                                                                                                                                                    |   |     | X |     | X | All ages | Both |
| Denmark        | 1986       | Danish Health and Medicines Authority. Denmark National Patient Registry 1986.                                                                                                                                                                                                                                    |   |     | X |     | X | All ages | Both |
| Denmark        | 1987       | Danish Health and Medicines Authority. Denmark National Patient Registry 1987.                                                                                                                                                                                                                                    |   |     | X |     | X | All ages | Both |

|         |                                                                                                |                                                                                                                                                                                                                                        |   |     |   |     |   |          |      |
|---------|------------------------------------------------------------------------------------------------|----------------------------------------------------------------------------------------------------------------------------------------------------------------------------------------------------------------------------------------|---|-----|---|-----|---|----------|------|
| Denmark | 1988                                                                                           | Danish Health and Medicines Authority. Denmark National Patient Registry 1988.                                                                                                                                                         |   |     | X |     | X | All ages | Both |
| Denmark | 1989                                                                                           | Danish Health and Medicines Authority. Denmark National Patient Registry 1989.                                                                                                                                                         |   |     | X |     | X | All ages | Both |
| Denmark | 1990                                                                                           | Danish Health and Medicines Authority. Denmark National Patient Registry 1990.                                                                                                                                                         |   |     | X |     | X | All ages | Both |
| Denmark | 1991                                                                                           | Danish Health and Medicines Authority. Denmark National Patient Registry 1991.                                                                                                                                                         |   |     | X |     | X | All ages | Both |
| Denmark | 1992                                                                                           | Danish Health and Medicines Authority. Denmark National Patient Registry 1992.                                                                                                                                                         |   |     | X |     | X | All ages | Both |
| Denmark | 1993                                                                                           | Danish Health and Medicines Authority. Denmark National Patient Registry 1993.                                                                                                                                                         |   |     | X |     | X | All ages | Both |
| Denmark | 1994                                                                                           | Danish Health and Medicines Authority. Denmark National Patient Registry 1994.                                                                                                                                                         |   |     | X |     | X | All ages | Both |
| Denmark | 1995                                                                                           | Danish Health and Medicines Authority. Denmark National Patient Registry 1995.                                                                                                                                                         |   |     | X |     | X | All ages | Both |
| Denmark | 1996                                                                                           | Danish Health and Medicines Authority. Denmark National Patient Registry 1996.                                                                                                                                                         |   |     | X |     | X | All ages | Both |
| Denmark | 1997                                                                                           | Danish Health and Medicines Authority. Denmark National Patient Registry 1997.                                                                                                                                                         |   |     | X |     | X | All ages | Both |
| Denmark | 1998                                                                                           | Danish Health and Medicines Authority. Denmark National Patient Registry 1998.                                                                                                                                                         |   |     | X |     | X | All ages | Both |
| Denmark | 1999, 2000                                                                                     | World Health Organization Regional Office for Europe (WHO/Europe). European Health for All Database - Outpatient Contacts Per Person Per Year. Copenhagen, Denmark: World Health Organization Regional Office for Europe (WHO/Europe). | X |     |   |     | X | All ages | Both |
| Denmark | 1999                                                                                           | Danish Health and Medicines Authority. Denmark National Patient Registry 1999.                                                                                                                                                         |   |     | X |     | X | All ages | Both |
| Denmark | 2000                                                                                           | Statistics Denmark, World Health Organization (WHO). Denmark WHO Multi-country Survey Study on Health and Health System Responsiveness 2000-2001. Geneva, Switzerland: World Health Organization (WHO).                                | X | 4.3 | X | 4.3 |   | All ages | Both |
| Denmark | 2000                                                                                           | Danish Health and Medicines Authority. Denmark National Patient Registry 2000.                                                                                                                                                         |   |     | X |     | X | All ages | Both |
| Denmark | 2001, 2002, 2003, 2004, 2005, 2006, 2007, 2008, 2009, 2010, 2011, 2012, 2013, 2014, 2015, 2016 | Organization for Economic Co-operation and Development (OECD). OECD Health Statistics. Paris, France: Organization for Economic Co-operation and Development (OECD).                                                                   | X |     |   |     | X | All ages | Both |
| Denmark | 2001                                                                                           | Danish Health and Medicines Authority. Denmark National Patient Registry 2001.                                                                                                                                                         |   |     | X |     | X | All ages | Both |
| Denmark | 2002                                                                                           | Danish Health and Medicines Authority. Denmark National Patient Registry 2002.                                                                                                                                                         |   |     | X |     | X | All ages | Both |
| Denmark | 2003                                                                                           | World Health Organization (WHO). Denmark World Health Survey 2003. Geneva, Switzerland: World Health Organization (WHO), 2005.                                                                                                         |   |     | X | 52  |   | 15-95    | Both |
| Denmark | 2003                                                                                           | Danish Health and Medicines Authority. Denmark National Patient Registry 2003.                                                                                                                                                         |   |     | X |     | X | All ages | Both |
| Denmark | 2004                                                                                           | Danish Health and Medicines Authority. Denmark National Patient Registry 2004.                                                                                                                                                         |   |     | X |     | X | All ages | Both |
| Denmark | 2005                                                                                           | Danish Health and Medicines Authority. Denmark National Patient Registry 2005.                                                                                                                                                         |   |     | X |     | X | All ages | Both |
| Denmark | 2006                                                                                           | Börsch-Supan, A. (2013). Survey of Health, Ageing and Retirement in Europe (SHARE) Wave 1. Release version: 2.6.0. SHARE-ERIC. Data set. DOI: 10.6103/SHARE.w1.260                                                                     | X | 52  | X | 52  |   | All ages | Both |
| Denmark | 2006                                                                                           | Danish Health and Medicines Authority. Denmark National Patient Registry 2006.                                                                                                                                                         |   |     | X |     | X | All ages | Both |
| Denmark | 2007                                                                                           | Danish Health and Medicines Authority. Denmark National Patient Registry 2007.                                                                                                                                                         |   |     | X |     | X | All ages | Both |
| Denmark | 2008                                                                                           | Danish Health and Medicines Authority. Denmark National Patient Registry 2008.                                                                                                                                                         |   |     | X |     | X | All ages | Both |
| Denmark | 2009                                                                                           | Danish Health and Medicines Authority. Denmark National Patient Registry 2009.                                                                                                                                                         |   |     | X |     | X | All ages | Both |
| Denmark | 2010                                                                                           | Börsch-Supan, A. (2013). Survey of Health, Ageing and Retirement in Europe (SHARE) Wave 2. Release version: 2.6.0. SHARE-ERIC. Data set. DOI: 10.6103/SHARE.w2.260                                                                     | X | 52  | X | 52  |   | 30-100+  | Both |
| Denmark | 2010                                                                                           | Danish Health and Medicines Authority. Denmark National Patient Registry 2010.                                                                                                                                                         |   |     | X |     | X | All ages | Both |
| Denmark | 2011                                                                                           | Danish Health and Medicines Authority. Denmark National Patient Registry 2011.                                                                                                                                                         |   |     | X |     | X | All ages | Both |
| Denmark | 2012                                                                                           | Börsch-Supan, A. (2013). Survey of Health, Ageing and Retirement in Europe (SHARE) Wave 4. Release version: 1.1.1. SHARE-ERIC. Data set. DOI: 10.6103/SHARE.w4.111                                                                     | X | 52  | X | 52  |   | 30-100+  | Both |
| Denmark | 2012                                                                                           | Danish Health and Medicines Authority. Denmark National Patient Registry 2012.                                                                                                                                                         |   |     | X |     | X | All ages | Both |
| Denmark | 2013                                                                                           | ISSP Research Group (2009): International Social Survey Programme: Health and Health Care - ISSP 2011. GESIS Data Archive, Cologne. ZA5800 Data file version 3.0.0, doi:10.4232/1.12252.                                               | X | 52  |   |     |   | 15-95    | Both |

|                    |      |                                                                                                                                                                                                                                                 |   |     |   |     |   |          |      |
|--------------------|------|-------------------------------------------------------------------------------------------------------------------------------------------------------------------------------------------------------------------------------------------------|---|-----|---|-----|---|----------|------|
| Denmark            | 2013 | Börsch-Supan, A. (2015). Survey of Health, Ageing and Retirement in Europe (SHARE) Wave 5. Release version: 1.0.0. SHARE-ERIC. Data set. DOI: 10.6103/SHARE.w5.100                                                                              | X | 52  | X | 52  |   | All ages | Both |
| Denmark            | 2013 | Danish Health and Medicines Authority. Denmark National Patient Registry 2013.                                                                                                                                                                  |   |     | X |     | X | All ages | Both |
| Dominica           | 2001 | Canadian International Development Agency (CIDA), Caribbean Community (CARICOM) Secretariat. Dominica Population and Housing Census 2001.                                                                                                       | X | 4.3 |   |     |   | All ages | Both |
| Dominican Republic | 2003 | World Health Organization (WHO). Dominican Republic World Health Survey 2003. Geneva, Switzerland: World Health Organization (WHO), 2005.                                                                                                       |   |     | X | 52  |   | 15-100+  | Both |
| Ecuador            | 1997 | National Institute of Statistics and Censuses (Ecuador). Ecuador Hospital Inpatient Discharges 1997. Quito, Ecuador: National Institute of Statistics and Censuses (Ecuador).                                                                   |   |     | X |     | X | 0-99     | Both |
| Ecuador            | 1998 | National Institute of Statistics and Censuses (Ecuador). Ecuador Hospital Inpatient Discharges 1998. Quito, Ecuador: National Institute of Statistics and Censuses (Ecuador).                                                                   |   |     | X |     | X | 0-99     | Both |
| Ecuador            | 1999 | National Institute of Statistics and Censuses (Ecuador). Ecuador Hospital Inpatient Discharges 1999. Quito, Ecuador: National Institute of Statistics and Censuses (Ecuador).                                                                   |   |     | X |     | X | 0-99     | Both |
| Ecuador            | 2000 | National Institute of Statistics and Censuses (Ecuador). Ecuador Hospital Inpatient Discharges 2000. Quito, Ecuador: National Institute of Statistics and Censuses (Ecuador).                                                                   |   |     | X |     | X | 0-99     | Both |
| Ecuador            | 2001 | National Institute of Statistics and Censuses (Ecuador). Ecuador Hospital Inpatient Discharges 2001. Quito, Ecuador: National Institute of Statistics and Censuses (Ecuador).                                                                   |   |     | X |     | X | 0-99     | Both |
| Ecuador            | 2002 | National Institute of Statistics and Censuses (Ecuador). Ecuador Hospital Inpatient Discharges 2002. Quito, Ecuador: National Institute of Statistics and Censuses (Ecuador).                                                                   |   |     | X |     | X | 0-99     | Both |
| Ecuador            | 2003 | World Health Organization (WHO). Ecuador World Health Survey 2003. Geneva, Switzerland: World Health Organization (WHO), 2005.                                                                                                                  |   |     | X | 52  |   | All ages | Both |
| Ecuador            | 2003 | National Institute of Statistics and Censuses (Ecuador). Ecuador Hospital Inpatient Discharges 2003. Quito, Ecuador: National Institute of Statistics and Censuses (Ecuador).                                                                   |   |     | X |     | X | 0-99     | Both |
| Ecuador            | 2004 | National Institute of Statistics and Censuses (Ecuador). Ecuador Hospital Inpatient Discharges 2004. Quito, Ecuador: National Institute of Statistics and Censuses (Ecuador).                                                                   |   |     | X |     | X | 0-99     | Both |
| Ecuador            | 2005 | National Institute of Statistics and Censuses (Ecuador). Ecuador Hospital Inpatient Discharges 2005. Quito, Ecuador: National Institute of Statistics and Censuses (Ecuador).                                                                   |   |     | X |     | X | 0-99     | Both |
| Ecuador            | 2006 | National Institute of Statistics and Censuses (Ecuador). Ecuador Hospital Inpatient Discharges 2006. Quito, Ecuador: National Institute of Statistics and Censuses (Ecuador).                                                                   |   |     | X |     | X | 0-99     | Both |
| Ecuador            | 2007 | National Institute of Statistics and Censuses (Ecuador). Ecuador Hospital Inpatient Discharges 2007. Quito, Ecuador: National Institute of Statistics and Censuses (Ecuador).                                                                   |   |     | X |     | X | 0-99     | Both |
| Ecuador            | 2008 | National Institute of Statistics and Censuses (Ecuador). Ecuador Hospital Inpatient Discharges 2008. Quito, Ecuador: National Institute of Statistics and Censuses (Ecuador).                                                                   |   |     | X |     | X | 0-99     | Both |
| Ecuador            | 2009 | National Institute of Statistics and Censuses (Ecuador). Ecuador Hospital Inpatient Discharges 2009. Quito, Ecuador: National Institute of Statistics and Censuses (Ecuador).                                                                   |   |     | X |     | X | 0-99     | Both |
| Ecuador            | 2010 | National Institute of Statistics and Censuses (Ecuador). Ecuador Hospital Inpatient Discharges 2010. Quito, Ecuador: National Institute of Statistics and Censuses (Ecuador).                                                                   |   |     | X |     | X | 0-99     | Both |
| Ecuador            | 2011 | National Institute of Statistics and Censuses (Ecuador). Ecuador Hospital Inpatient Discharges 2011. Quito, Ecuador: National Institute of Statistics and Censuses (Ecuador).                                                                   |   |     | X |     | X | 0-99     | Both |
| Ecuador            | 2012 | National Institute of Statistics and Censuses (Ecuador). Ecuador Hospital Inpatient Discharges 2012. Quito, Ecuador: National Institute of Statistics and Censuses (Ecuador), 2013.                                                             |   |     | X |     | X | 0-99     | Both |
| Ecuador            | 2013 | National Institute of Statistics and Censuses (Ecuador). Ecuador Hospital Inpatient Discharges 2013. Quito, Ecuador: National Institute of Statistics and Censuses (Ecuador).                                                                   |   |     | X |     | X | 0-99     | Both |
| Ecuador            | 2014 | National Institute of Statistics and Censuses (Ecuador). Ecuador Hospital Inpatient Discharges 2014. Quito, Ecuador: National Institute of Statistics and Censuses (Ecuador).                                                                   |   |     | X |     | X | 0-99     | Both |
| Egypt              | 2000 | Health Care International, World Health Organization (WHO). Egypt WHO Multi-country Survey Study on Health and Health System Responsiveness 2000-2001. Geneva, Switzerland: World Health Organization (WHO).                                    | X | 4.3 | X | 4.3 |   | All ages | Both |
| Egypt              | 2009 | Information and Decision Support Center (IDSC) (Egypt), Population Council. Egypt Survey of Young People 2009. New York City, United States: Population Council.                                                                                | X | 26  |   |     |   | 10-29    | Both |
| El Salvador        | 2013 | General Administration of Statistics and Censuses (El Salvador), Ministry of Economy (El Salvador). El Salvador Multipurpose Household Survey 2013. San Salvador, El Salvador: General Administration of Statistics and Censuses (El Salvador). | X | 4.3 | X | 4.3 |   | All ages | Both |
| El Salvador        | 2014 | General Administration of Statistics and Censuses (El Salvador), Ministry of Economy (El Salvador). El Salvador Multipurpose Household Survey 2014. San Salvador, El Salvador: General Administration of Statistics and Censuses (El Salvador). | X | 4.3 | X | 4.3 |   | All ages | Both |

|         |                                                                                          |                                                                                                                                                                                                                                          |   |     |   |     |   |          |      |
|---------|------------------------------------------------------------------------------------------|------------------------------------------------------------------------------------------------------------------------------------------------------------------------------------------------------------------------------------------|---|-----|---|-----|---|----------|------|
| England | 1999, 2001, 2002, 2003, 2004, 2006, 2007, 2009, 2010                                     | World Health Organization Regional Office for Europe (WHO/Europe). European Hospital Morbidity Database 1999-2007. Copenhagen, Denmark: World Health Organization Regional Office for Europe (WHO/Europe).                               |   |     | X |     | X | All ages | Both |
| England | 2000, 2001, 2002, 2003, 2004, 2005, 2006, 2007, 2008, 2009, 2010, 2011, 2012, 2013, 2014 | Organization for Economic Co-operation and Development (OECD). OECD Health Statistics. Paris, France: Organization for Economic Co-operation and Development (OECD).                                                                     |   |     | X |     | X | All ages | Both |
| England | 2000                                                                                     | National Centre for Social Research (NatCen), World Health Organization (WHO). United Kingdom WHO Multi-country Survey Study on Health and Health System Responsiveness 2000-2001. Geneva, Switzerland: World Health Organization (WHO). | X | 4.3 | X | 4.3 |   | All ages | Both |
| England | 2004                                                                                     | World Health Organization (WHO). United Kingdom World Health Survey 2004. Geneva, Switzerland: World Health Organization (WHO), 2005.                                                                                                    |   |     | X | 52  |   | All ages | Both |
| England | 2006                                                                                     | Department of Health, Social Services and Public Safety (Northern Ireland), Information Centre for Health and Social Care, NHS, NHS England, NHS Health Scotland, NHS Wales. United Kingdom Hospital Patient and Discharge Data 2006.    |   |     | X |     | X | All ages | Both |
| England | 2012                                                                                     | Department of Health, Social Services and Public Safety (Northern Ireland), Information Centre for Health and Social Care, NHS, NHS England, NHS Health Scotland, NHS Wales. United Kingdom Hospital Patient and Discharge Data 2012.    |   |     | X |     | X | All ages | Both |
| England | 2013                                                                                     | Department of Health, Social Services and Public Safety (Northern Ireland), Information Centre for Health and Social Care, NHS, NHS England, NHS Health Scotland, NHS Wales. United Kingdom Hospital Patient and Discharge Data 2013.    |   |     | X |     | X | All ages | Both |
| England | 2014                                                                                     | Department of Health, Social Services and Public Safety (Northern Ireland), Information Centre for Health and Social Care, NHS, NHS England, NHS Health Scotland, NHS Wales. United Kingdom Hospital Patient and Discharge Data 2014.    |   |     | X |     | X | All ages | Both |
| Estonia | 1980                                                                                     | National Institute for Health Development (Estonia). Estonia Hospital Inpatient Discharges 1980.                                                                                                                                         |   |     | X |     | X | All ages | Both |
| Estonia | 1985                                                                                     | National Institute for Health Development (Estonia). Estonia Hospital Inpatient Discharges 1985.                                                                                                                                         |   |     | X |     | X | All ages | Both |
| Estonia | 1986                                                                                     | National Institute for Health Development (Estonia). Estonia Hospital Inpatient Discharges 1986.                                                                                                                                         |   |     | X |     | X | All ages | Both |
| Estonia | 1987                                                                                     | National Institute for Health Development (Estonia). Estonia Hospital Inpatient Discharges 1987.                                                                                                                                         |   |     | X |     | X | All ages | Both |
| Estonia | 1988                                                                                     | National Institute for Health Development (Estonia). Estonia Hospital Inpatient Discharges 1988.                                                                                                                                         |   |     | X |     | X | All ages | Both |
| Estonia | 1989                                                                                     | National Institute for Health Development (Estonia). Estonia Hospital Inpatient Discharges 1989.                                                                                                                                         |   |     | X |     | X | All ages | Both |
| Estonia | 1990                                                                                     | National Institute for Health Development (Estonia). Estonia Hospital Inpatient Discharges 1990.                                                                                                                                         |   |     | X |     | X | All ages | Both |
| Estonia | 1991                                                                                     | National Institute for Health Development (Estonia). Estonia Hospital Inpatient Discharges 1991.                                                                                                                                         |   |     | X |     | X | All ages | Both |
| Estonia | 1992                                                                                     | National Institute for Health Development (Estonia). Estonia Hospital Inpatient Discharges 1992.                                                                                                                                         |   |     | X |     | X | All ages | Both |
| Estonia | 1993                                                                                     | National Institute for Health Development (Estonia). Estonia Hospital Inpatient Discharges 1993.                                                                                                                                         |   |     | X |     | X | All ages | Both |
| Estonia | 1994                                                                                     | National Institute for Health Development (Estonia). Estonia Hospital Inpatient Discharges 1994.                                                                                                                                         |   |     | X |     | X | All ages | Both |
| Estonia | 1995                                                                                     | National Institute for Health Development (Estonia). Estonia Hospital Inpatient Discharges 1995.                                                                                                                                         |   |     | X |     | X | All ages | Both |
| Estonia | 1996                                                                                     | National Institute for Health Development (Estonia). Estonia Hospital Inpatient Discharges 1996.                                                                                                                                         |   |     | X |     | X | All ages | Both |
| Estonia | 1997                                                                                     | National Institute for Health Development (Estonia). Estonia Hospital Inpatient Discharges 1997.                                                                                                                                         |   |     | X |     | X | All ages | Both |
| Estonia | 1998                                                                                     | National Institute for Health Development (Estonia). Estonia Hospital Inpatient Discharges 1998.                                                                                                                                         |   |     | X |     | X | All ages | Both |
| Estonia | 1998                                                                                     | National Institute for Health Development (Estonia). Estonia Outpatient Contacts Per Person Per Year 1998.                                                                                                                               | X |     |   |     | X | All ages | Both |
| Estonia | 1999, 2001                                                                               | World Health Organization Regional Office for Europe (WHO/Europe). European Hospital Morbidity Database 1999-2007. Copenhagen, Denmark: World Health Organization Regional Office for Europe (WHO/Europe).                               |   |     | X |     | X | All ages | Both |
| Estonia | 1999                                                                                     | National Institute for Health Development (Estonia). Estonia Hospital Inpatient Discharges 1999.                                                                                                                                         |   |     | X |     | X | All ages | Both |
| Estonia | 1999                                                                                     | National Institute for Health Development (Estonia). Estonia Outpatient Contacts Per Person Per Year 1999.                                                                                                                               | X |     |   |     | X | All ages | Both |

|          |                                                                                          |                                                                                                                                                                                                                                      |   |     |   |     |   |          |      |
|----------|------------------------------------------------------------------------------------------|--------------------------------------------------------------------------------------------------------------------------------------------------------------------------------------------------------------------------------------|---|-----|---|-----|---|----------|------|
| Estonia  | 2000                                                                                     | International Research Associates (INRA) Europe, World Health Organization (WHO). Estonia WHO Multi-country Survey Study on Health and Health System Responsiveness 2000-2001. Geneva, Switzerland: World Health Organization (WHO). | X | 4.3 | X | 4.3 |   | 15-90    | Both |
| Estonia  | 2001, 2002, 2003, 2004, 2005, 2006, 2007, 2008, 2009, 2010, 2011, 2012, 2013, 2014, 2015 | Organization for Economic Co-operation and Development (OECD). OECD Health Statistics. Paris, France: Organization for Economic Co-operation and Development (OECD).                                                                 | X |     |   |     | X | All ages | Both |
| Estonia  | 2003                                                                                     | World Health Organization (WHO). Estonia World Health Survey 2003. Geneva, Switzerland: World Health Organization (WHO), 2005.                                                                                                       |   |     | X | 52  |   | 0-95     | Both |
| Estonia  | 2003                                                                                     | Ministry of Social Affairs (Estonia). Estonia Hospital Inpatient Discharges 2003.                                                                                                                                                    |   |     | X |     | X | All ages | Both |
| Estonia  | 2004                                                                                     | Ministry of Social Affairs (Estonia). Estonia Hospital Inpatient Discharges 2004.                                                                                                                                                    |   |     | X |     | X | All ages | Both |
| Estonia  | 2005                                                                                     | Ministry of Social Affairs (Estonia). Estonia Hospital Inpatient Discharges 2005.                                                                                                                                                    |   |     | X |     | X | All ages | Both |
| Estonia  | 2006                                                                                     | Ministry of Social Affairs (Estonia). Estonia Hospital Inpatient Discharges 2006.                                                                                                                                                    |   |     | X |     | X | All ages | Both |
| Estonia  | 2007                                                                                     | Ministry of Social Affairs (Estonia). Estonia Hospital Inpatient Discharges 2007.                                                                                                                                                    |   |     | X |     | X | All ages | Both |
| Estonia  | 2008                                                                                     | Ministry of Social Affairs (Estonia). Estonia Hospital Inpatient Discharges 2008.                                                                                                                                                    |   |     | X |     | X | All ages | Both |
| Estonia  | 2009                                                                                     | Ministry of Social Affairs (Estonia). Estonia Hospital Inpatient Discharges 2009.                                                                                                                                                    |   |     | X |     | X | All ages | Both |
| Estonia  | 2010                                                                                     | Ministry of Social Affairs (Estonia). Estonia Hospital Inpatient Discharges 2010.                                                                                                                                                    |   |     | X |     | X | All ages | Both |
| Estonia  | 2011                                                                                     | Ministry of Social Affairs (Estonia). Estonia Hospital Inpatient Discharges 2011.                                                                                                                                                    |   |     | X |     | X | All ages | Both |
| Estonia  | 2012                                                                                     | Börsch-Supan, A. (2013). Survey of Health, Ageing and Retirement in Europe (SHARE) Wave 4. Release version: 1.1.1. SHARE-ERIC. Data set. DOI: 10.6103/SHARE.w4.111                                                                   | X | 52  | X | 52  |   | 25-100+  | Both |
| Estonia  | 2012                                                                                     | National Institute for Health Development (Estonia). Estonia Hospital Inpatient Discharges 2012.                                                                                                                                     |   |     | X |     | X | All ages | Both |
| Estonia  | 2013                                                                                     | Börsch-Supan, A. (2015). Survey of Health, Ageing and Retirement in Europe (SHARE) Wave 5. Release version: 1.0.0. SHARE-ERIC. Data set. DOI: 10.6103/SHARE.w5.100                                                                   | X | 52  | X | 52  |   | All ages | Both |
| Estonia  | 2013                                                                                     | National Institute for Health Development (Estonia). Estonia Hospital Inpatient Discharges 2013.                                                                                                                                     |   |     | X |     | X | All ages | Both |
| Estonia  | 2014                                                                                     | National Institute for Health Development (Estonia). Estonia Hospital Inpatient Discharges 2014.                                                                                                                                     |   |     | X |     | X | All ages | Both |
| Ethiopia | 1996                                                                                     | Central Statistical Agency (Ethiopia). Ethiopia Welfare Monitoring Survey 1996.                                                                                                                                                      | X | 8.6 |   |     |   | All ages | Both |
| Ethiopia | 1999                                                                                     | Central Statistical Agency (Ethiopia). Ethiopia Welfare Monitoring and Income Expenditure Surveys 1999-2000. Addis Ababa, Ethiopia: Central Statistical Agency (Ethiopia).                                                           | X | 8.6 |   |     |   | All ages | Both |
| Ethiopia | 2000                                                                                     | Central Statistical Agency (Ethiopia). Ethiopia Welfare Monitoring Survey 2000.                                                                                                                                                      | X | 8.6 |   |     |   | All ages | Both |
| Ethiopia | 2003                                                                                     | World Health Organization (WHO). Ethiopia World Health Survey 2003. Geneva, Switzerland: World Health Organization (WHO), 2005.                                                                                                      |   |     | X | 52  |   | All ages | Both |
| Ethiopia | 2004                                                                                     | Central Statistical Agency (Ethiopia). Ethiopia Welfare Monitoring Survey 2004.                                                                                                                                                      | X | 8.6 |   |     |   | All ages | Both |
| Ethiopia | 2011                                                                                     | Central Statistical Agency (Ethiopia), World Bank. Ethiopia Living Standards Measurement Study - Integrated Survey on Agriculture 2011-2012. Washington DC, United States: World Bank.                                               | X | 8.6 |   |     |   | All ages | Both |
| Ethiopia | 2013                                                                                     | Central Statistical Agency (Ethiopia), World Bank. Ethiopia Living Standards Measurement Study - Integrated Survey on Agriculture 2013-2014. Washington DC, United States: World Bank, 2015.                                         | X | 52  |   |     |   | 0-90     | Both |
| Finland  | 1988                                                                                     | National Institute for Health and Welfare (THL) (Finland). Finland Hospital Discharge Register 1988.                                                                                                                                 |   |     | X |     | X | All ages | Both |
| Finland  | 1989                                                                                     | National Institute for Health and Welfare (THL) (Finland). Finland Hospital Discharge Register 1989.                                                                                                                                 |   |     | X |     | X | All ages | Both |
| Finland  | 1990                                                                                     | National Institute for Health and Welfare (THL) (Finland). Finland Hospital Discharge Register 1990.                                                                                                                                 |   |     | X |     | X | All ages | Both |
| Finland  | 1991                                                                                     | National Institute for Health and Welfare (THL) (Finland). Finland Hospital Discharge Register 1991.                                                                                                                                 |   |     | X |     | X | All ages | Both |
| Finland  | 1992                                                                                     | National Institute for Health and Welfare (THL) (Finland). Finland Hospital Discharge Register 1992.                                                                                                                                 |   |     | X |     | X | All ages | Both |
| Finland  | 1993                                                                                     | National Institute for Health and Welfare (THL) (Finland). Finland Hospital Discharge Register 1993.                                                                                                                                 |   |     | X |     | X | All ages | Both |
| Finland  | 1994                                                                                     | National Institute for Health and Welfare (THL) (Finland). Finland Hospital Discharge Register 1994.                                                                                                                                 |   |     | X |     | X | All ages | Both |
| Finland  | 1995                                                                                     | National Institute for Health and Welfare (THL) (Finland). Finland Hospital Discharge Register 1995.                                                                                                                                 |   |     | X |     | X | All ages | Both |



|         |                                                                                                                                                                                                       |                                                                                                                                                                                                                                                                                                                          |   |     |   |     |   |          |      |
|---------|-------------------------------------------------------------------------------------------------------------------------------------------------------------------------------------------------------|--------------------------------------------------------------------------------------------------------------------------------------------------------------------------------------------------------------------------------------------------------------------------------------------------------------------------|---|-----|---|-----|---|----------|------|
| Finland | 1996                                                                                                                                                                                                  | National Institute for Health and Welfare (THL) (Finland). Finland Hospital Discharge Register 1996.                                                                                                                                                                                                                     |   |     | X |     | X | All ages | Both |
| Finland | 1997                                                                                                                                                                                                  | National Institute for Health and Welfare (THL) (Finland). Finland Hospital Discharge Register 1997.                                                                                                                                                                                                                     |   |     | X |     | X | All ages | Both |
| Finland | 1998                                                                                                                                                                                                  | National Institute for Health and Welfare (THL) (Finland). Finland Hospital Discharge Register 1998.                                                                                                                                                                                                                     |   |     | X |     | X | All ages | Both |
| Finland | 1998                                                                                                                                                                                                  | National Institute for Health and Welfare (THL) (Finland). Finland Outpatient Contacts Per Person Per Year 1998.                                                                                                                                                                                                         | X |     |   |     | X | All ages | Both |
| Finland | 1999, 2001, 2002, 2003, 2004, 2005, 2006, 2007, 2009, 2010, 2011                                                                                                                                      | World Health Organization Regional Office for Europe (WHO/Europe). European Hospital Morbidity Database 1999-2007. Copenhagen, Denmark: World Health Organization Regional Office for Europe (WHO/Europe).                                                                                                               |   |     | X |     | X | All ages | Both |
| Finland | 1999                                                                                                                                                                                                  | National Institute for Health and Welfare (THL) (Finland). Finland Hospital Discharge Register 1999.                                                                                                                                                                                                                     |   |     | X |     | X | All ages | Both |
| Finland | 1999                                                                                                                                                                                                  | National Institute for Health and Welfare (THL) (Finland). Finland Outpatient Contacts Per Person Per Year 1999.                                                                                                                                                                                                         | X |     |   |     | X | All ages | Both |
| Finland | 2000                                                                                                                                                                                                  | International Research Associates (INRA) Europe, National Research and Development Center for Welfare and Health (STAKES) (Finland), World Health Organization (WHO). Finland WHO Multi-country Survey Study on Health and Health System Responsiveness 2000-2001. Geneva, Switzerland: World Health Organization (WHO). | X | 4.3 | X | 4.3 |   | All ages | Both |
| Finland | 2001, 2002, 2003, 2004, 2005, 2006, 2007, 2008, 2009, 2010, 2011, 2012, 2013, 2014, 2015                                                                                                              | Organization for Economic Co-operation and Development (OECD). OECD Health Statistics. Paris, France: Organization for Economic Co-operation and Development (OECD).                                                                                                                                                     | X |     |   |     | X | All ages | Both |
| Finland | 2004                                                                                                                                                                                                  | World Health Organization (WHO). Finland World Health Survey 2004. Geneva, Switzerland: World Health Organization (WHO), 2005.                                                                                                                                                                                           |   |     | X | 52  |   | 15-95    | Both |
| Finland | 2011                                                                                                                                                                                                  | ISSP Research Group (2009): International Social Survey Programme: Health and Health Care - ISSP 2011. GESIS Data Archive, Cologne. ZA5800 Data file version 3.0.0, doi:10.4232/1.12252.                                                                                                                                 | X | 52  |   |     |   | 15-80    | Both |
| Finland | 2013                                                                                                                                                                                                  | National Institute for Health and Welfare (THL) (Finland). Finland Hospital Discharge Register 2013.                                                                                                                                                                                                                     |   |     | X |     | X | All ages | Both |
| Finland | 2014                                                                                                                                                                                                  | National Institute for Health and Welfare (THL) (Finland). Finland Health Behavior and Health Among the Adult Population 2014.                                                                                                                                                                                           | X | 52  |   |     |   | All ages | Both |
| Finland | 2014                                                                                                                                                                                                  | National Institute for Health and Welfare (THL) (Finland). Finland Hospital Discharge Register 2014.                                                                                                                                                                                                                     |   |     | X |     | X | All ages | Both |
| France  | 1974, 1975, 1976, 1977, 1978, 1979, 1980, 1981, 1982, 1983, 1984, 1985, 1986, 1987, 1988, 1989, 1990, 1991, 1992, 1993, 1994, 1995, 1996, 1997, 1998, 1999, 2000, 2001, 2002, 2003, 2004, 2005, 2006. | Organization for Economic Co-operation and Development (OECD). OECD Health Statistics. Paris, France: Organization for Economic Co-operation and Development (OECD).                                                                                                                                                     |   |     | X |     | X | All ages | Both |



|         |                                                                              |                                                                                                                                                                                                                                                      |   |     |   |     |   |          |      |
|---------|------------------------------------------------------------------------------|------------------------------------------------------------------------------------------------------------------------------------------------------------------------------------------------------------------------------------------------------|---|-----|---|-----|---|----------|------|
|         | 2007,<br>2008,<br>2009,<br>2010,<br>2011,<br>2012,<br>2013,<br>2014,<br>2015 |                                                                                                                                                                                                                                                      |   |     |   |     |   |          |      |
| France  | 1999,<br>2000                                                                | World Health Organization Regional Office for Europe (WHO/Europe). European Health for All Database - Outpatient Contacts Per Person Per Year. Copenhagen, Denmark: World Health Organization Regional Office for Europe (WHO/Europe).               | X |     |   |     | X | All ages | Both |
| France  | 2000                                                                         | Erik Consulting, International Research Associates (INRA) Europe, World Health Organization (WHO). France WHO Multi-country Survey Study on Health and Health System Responsiveness 2000-2001. Geneva, Switzerland: World Health Organization (WHO). | X | 4.3 | X | 4.3 |   | All ages | Both |
| France  | 2003                                                                         | World Health Organization (WHO). France World Health Survey 2003. Geneva, Switzerland: World Health Organization (WHO), 2005.                                                                                                                        |   |     | X | 52  |   | 0-95     | Both |
| France  | 2006                                                                         | Börsch-Supan, A. (2013). Survey of Health, Ageing and Retirement in Europe (SHARE) Wave 1. Release version: 2.6.0. SHARE-ERIC. Data set. DOI: 10.6103/SHARE.w1.260                                                                                   | X | 52  | X | 52  |   | All ages | Both |
| France  | 2010                                                                         | Börsch-Supan, A. (2013). Survey of Health, Ageing and Retirement in Europe (SHARE) Wave 2. Release version: 2.6.0. SHARE-ERIC. Data set. DOI: 10.6103/SHARE.w2.260                                                                                   | X | 52  | X | 52  |   | 35-100+  | Both |
| France  | 2011                                                                         | ISSP Research Group (2009): International Social Survey Programme: Health and Health Care - ISSP 2011. GESIS Data Archive, Cologne. ZA5800 Data file version 3.0.0, doi:10.4232/1.12252.                                                             | X | 52  |   |     |   | 15-100+  | Both |
| France  | 2012                                                                         | Börsch-Supan, A. (2013). Survey of Health, Ageing and Retirement in Europe (SHARE) Wave 4. Release version: 1.1.1. SHARE-ERIC. Data set. DOI: 10.6103/SHARE.w4.111                                                                                   | X | 52  | X | 52  |   | 40-100+  | Both |
| France  | 2013                                                                         | Börsch-Supan, A. (2015). Survey of Health, Ageing and Retirement in Europe (SHARE) Wave 5. Release version: 1.0.0. SHARE-ERIC. Data set. DOI: 10.6103/SHARE.w5.100                                                                                   | X | 52  | X | 52  |   | All ages | Both |
| Georgia | 1980                                                                         | National Center for Disease Control and Public Health (Georgia). Georgia Inpatient Care Discharges per 100 1980.                                                                                                                                     |   |     | X |     | X | All ages | Both |
| Georgia | 1985                                                                         | National Center for Disease Control and Public Health (Georgia). Georgia Inpatient Care Discharges per 100 1985.                                                                                                                                     |   |     | X |     | X | All ages | Both |
| Georgia | 1986                                                                         | National Center for Disease Control and Public Health (Georgia). Georgia Inpatient Care Discharges per 100 1986.                                                                                                                                     |   |     | X |     | X | All ages | Both |
| Georgia | 1987                                                                         | National Center for Disease Control and Public Health (Georgia). Georgia Inpatient Care Discharges per 100 1987.                                                                                                                                     |   |     | X |     | X | All ages | Both |
| Georgia | 1988                                                                         | National Center for Disease Control and Public Health (Georgia). Georgia Inpatient Care Discharges per 100 1988.                                                                                                                                     |   |     | X |     | X | All ages | Both |
| Georgia | 1989                                                                         | National Center for Disease Control and Public Health (Georgia). Georgia Inpatient Care Discharges per 100 1989.                                                                                                                                     |   |     | X |     | X | All ages | Both |
| Georgia | 1990                                                                         | National Center for Disease Control and Public Health (Georgia). Georgia Inpatient Care Discharges per 100 1990.                                                                                                                                     |   |     | X |     | X | All ages | Both |
| Georgia | 1991                                                                         | National Center for Disease Control and Public Health (Georgia). Georgia Inpatient Care Discharges per 100 1991.                                                                                                                                     |   |     | X |     | X | All ages | Both |
| Georgia | 1992                                                                         | National Center for Disease Control and Public Health (Georgia). Georgia Inpatient Care Discharges per 100 1992.                                                                                                                                     |   |     | X |     | X | All ages | Both |
| Georgia | 1993                                                                         | National Center for Disease Control and Public Health (Georgia). Georgia Inpatient Care Discharges per 100 1993.                                                                                                                                     |   |     | X |     | X | All ages | Both |
| Georgia | 1994                                                                         | National Center for Disease Control and Public Health (Georgia). Georgia Inpatient Care Discharges per 100 1994.                                                                                                                                     |   |     | X |     | X | All ages | Both |
| Georgia | 1995                                                                         | National Center for Disease Control and Public Health (Georgia). Georgia Inpatient Care Discharges per 100 1995.                                                                                                                                     |   |     | X |     | X | All ages | Both |
| Georgia | 1996                                                                         | National Center for Disease Control and Public Health (Georgia). Georgia Inpatient Care Discharges per 100 1996.                                                                                                                                     |   |     | X |     | X | All ages | Both |
| Georgia | 1997                                                                         | National Center for Disease Control and Public Health (Georgia). Georgia Inpatient Care Discharges per 100 1997.                                                                                                                                     |   |     | X |     | X | All ages | Both |
| Georgia | 1998                                                                         | National Center for Disease Control and Public Health (Georgia). Georgia Inpatient Care Discharges per 100 1998.                                                                                                                                     |   |     | X |     | X | All ages | Both |
| Georgia | 1999                                                                         | National Center for Disease Control and Public Health (Georgia). Georgia Inpatient Care Discharges per 100 1999.                                                                                                                                     |   |     | X |     | X | All ages | Both |
| Georgia | 2000                                                                         | Institute for Polling and Marketing (Georgia). World Health Organization (WHO). Georgia WHO Multi-country Survey Study on Health and Health System Responsiveness 2000-2001.                                                                         |   |     | X | 4.3 |   | All ages | Both |

|         |                                                                                                                        |                                                                                                                                                                                                                                                                                                 |   |    |   |    |   |          |      |
|---------|------------------------------------------------------------------------------------------------------------------------|-------------------------------------------------------------------------------------------------------------------------------------------------------------------------------------------------------------------------------------------------------------------------------------------------|---|----|---|----|---|----------|------|
| Georgia | 2000                                                                                                                   | National Center for Disease Control and Public Health (Georgia). Georgia Inpatient Care Discharges per 100 2000.                                                                                                                                                                                |   |    | X |    | X | All ages | Both |
| Georgia | 2001                                                                                                                   | National Center for Disease Control and Public Health (Georgia). Georgia Inpatient Care Discharges per 100 2001.                                                                                                                                                                                |   |    | X |    | X | All ages | Both |
| Georgia | 2002                                                                                                                   | National Center for Disease Control and Public Health (Georgia). Georgia Inpatient Care Discharges per 100 2002.                                                                                                                                                                                |   |    | X |    | X | All ages | Both |
| Georgia | 2003                                                                                                                   | World Health Organization (WHO). Georgia World Health Survey 2003. Geneva, Switzerland: World Health Organization (WHO), 2005.                                                                                                                                                                  |   |    | X | 52 |   | 15-100+  | Both |
| Georgia | 2003                                                                                                                   | National Center for Disease Control and Public Health (Georgia). Georgia Inpatient Care Discharges per 100 2003.                                                                                                                                                                                |   |    | X |    | X | All ages | Both |
| Georgia | 2004                                                                                                                   | National Center for Disease Control and Public Health (Georgia). Georgia Inpatient Care Discharges per 100 2004.                                                                                                                                                                                |   |    | X |    | X | All ages | Both |
| Georgia | 2005                                                                                                                   | National Center for Disease Control and Public Health (Georgia). Georgia Inpatient Care Discharges per 100 2005.                                                                                                                                                                                |   |    | X |    | X | All ages | Both |
| Georgia | 2006                                                                                                                   | National Center for Disease Control and Public Health (Georgia). Georgia Inpatient Care Discharges per 100 2006.                                                                                                                                                                                |   |    | X |    | X | All ages | Both |
| Georgia | 2007                                                                                                                   | National Center for Disease Control and Public Health (Georgia). Georgia Inpatient Care Discharges per 100 2007.                                                                                                                                                                                |   |    | X |    | X | All ages | Both |
| Georgia | 2008                                                                                                                   | National Center for Disease Control and Public Health (Georgia). Georgia Inpatient Care Discharges per 100 2008.                                                                                                                                                                                |   |    | X |    | X | All ages | Both |
| Georgia | 2009                                                                                                                   | National Center for Disease Control and Public Health (Georgia). Georgia Inpatient Care Discharges per 100 2009.                                                                                                                                                                                |   |    | X |    | X | All ages | Both |
| Georgia | 2010                                                                                                                   | Concluzia-Prim Center for Survey Methodology (Moldova), Georgia Opinion Research Business International (GORBI), Institute for Advanced Studies (Austria), London School of Hygiene and Tropical Medicine, University of Aberdeen. Georgia Health in Times of Transition Household Survey 2010. |   |    | X | 52 |   | 15-95    | Both |
| Georgia | 2010                                                                                                                   | National Center for Disease Control and Public Health (Georgia). Georgia Inpatient Care Discharges per 100 2010.                                                                                                                                                                                |   |    | X |    | X | All ages | Both |
| Georgia | 2011                                                                                                                   | National Center for Disease Control and Public Health (Georgia). Georgia Inpatient Care Discharges per 100 2011.                                                                                                                                                                                |   |    | X |    | X | All ages | Both |
| Georgia | 2012                                                                                                                   | National Center for Disease Control and Public Health (Georgia). Georgia Inpatient Care Discharges per 100 2012.                                                                                                                                                                                |   |    | X |    | X | All ages | Both |
| Georgia | 2013                                                                                                                   | National Center for Disease Control and Public Health (Georgia). Georgia Inpatient Care Discharges per 100 2013.                                                                                                                                                                                |   |    | X |    | X | All ages | Both |
| Georgia | 2014                                                                                                                   | National Center for Disease Control and Public Health (Georgia). Georgia Inpatient Care Discharges per 100 2014.                                                                                                                                                                                |   |    | X |    | X | All ages | Both |
| Germany | 1971, 1972, 1973, 1974, 1975, 1976, 1977, 1978, 1979, 1980, 1981, 1982, 1983, 1984, 1985, 1986, 1987, 1988, 1989, 1990 | World Health Organization Regional Office for Europe (WHO/Europe). European Health for All Database - Inpatient Care Discharges Per 100. Copenhagen, Denmark: World Health Organization Regional Office for Europe (WHO/Europe).                                                                |   |    | X |    | X | All ages | Both |
| Germany | 1990                                                                                                                   | Federal Statistical Office (Germany). Germany Federal Health Reporting Hospital Discharges 1990.                                                                                                                                                                                                |   |    | X |    | X | All ages | Both |
| Germany | 1991                                                                                                                   | Federal Statistical Office (Germany). Germany Federal Health Reporting Hospital Discharges 1991.                                                                                                                                                                                                |   |    | X |    | X | All ages | Both |
| Germany | 1992                                                                                                                   | Federal Statistical Office (Germany). Germany Federal Health Reporting Hospital Discharges 1992.                                                                                                                                                                                                |   |    | X |    | X | All ages | Both |
| Germany | 1993                                                                                                                   | Federal Statistical Office (Germany). Germany Federal Health Reporting Hospital Discharges 1993.                                                                                                                                                                                                |   |    | X |    | X | All ages | Both |
| Germany | 1994                                                                                                                   | Federal Statistical Office (Germany). Germany Federal Health Reporting Hospital Discharges 1994.                                                                                                                                                                                                |   |    | X |    | X | All ages | Both |
| Germany | 1995                                                                                                                   | Federal Statistical Office (Germany). Germany Federal Health Reporting Hospital Discharges 1995.                                                                                                                                                                                                |   |    | X |    | X | All ages | Both |
| Germany | 1996                                                                                                                   | Federal Statistical Office (Germany). Germany Federal Health Reporting Hospital Discharges 1996.                                                                                                                                                                                                |   |    | X |    | X | All ages | Both |
| Germany | 1997                                                                                                                   | Federal Environment Agency (Germany), Federal Institute for Drugs and Medical Devices (Germany), Max Planck Institute of Psychiatry, Robert Koch Institute. Germany National Health Interview and Examination Survey 1997-1999. Berlin, Germany: Robert Koch Institute, 2000.                   | X | 52 | X | 4  |   | 15-80    | Both |
| Germany | 1997                                                                                                                   | Federal Statistical Office (Germany). Germany Federal Health Reporting Hospital Discharges 1997.                                                                                                                                                                                                |   |    | X |    | X | All ages | Both |
| Germany | 1998                                                                                                                   | Federal Statistical Office (Germany). Germany Federal Health Reporting Hospital Discharges 1998.                                                                                                                                                                                                |   |    | X |    | X | All ages | Both |
| Germany | 1999                                                                                                                   | Federal Statistical Office (Germany). Germany Federal Health Reporting Hospital Discharges 1999.                                                                                                                                                                                                |   |    | X |    | X | All ages | Both |

|         |                                                      |                                                                                                                                                                                                                                                                                                                                                                  |   |     |   |     |   |          |      |
|---------|------------------------------------------------------|------------------------------------------------------------------------------------------------------------------------------------------------------------------------------------------------------------------------------------------------------------------------------------------------------------------------------------------------------------------|---|-----|---|-----|---|----------|------|
| Germany | 2000                                                 | International Research Associates (INRA) Europe, World Health Organization (WHO). Germany WHO Multi-country Survey Study on Health and Health System Responsiveness 2000-2001. Geneva, Switzerland: World Health Organization (WHO).                                                                                                                             | X | 4.3 | X | 4.3 |   | 15-100+  | Both |
| Germany | 2000                                                 | Federal Statistical Office (Germany). Germany Federal Health Reporting Hospital Discharges 2000.                                                                                                                                                                                                                                                                 |   |     | X |     | X | All ages | Both |
| Germany | 2001                                                 | Federal Statistical Office (Germany). Germany Federal Health Reporting Hospital Discharges 2001.                                                                                                                                                                                                                                                                 |   |     | X |     | X | All ages | Both |
| Germany | 2002, 2003, 2004, 2005, 2006, 2007, 2009, 2010, 2011 | World Health Organization Regional Office for Europe (WHO/Europe). European Hospital Morbidity Database 1999-2007. Copenhagen, Denmark: World Health Organization Regional Office for Europe (WHO/Europe).                                                                                                                                                       |   |     | X |     | X | All ages | Both |
| Germany | 2002                                                 | Federal Statistical Office (Germany). Germany Federal Health Reporting Hospital Discharges 2002.                                                                                                                                                                                                                                                                 |   |     | X |     | X | All ages | Both |
| Germany | 2003                                                 | World Health Organization (WHO). Germany World Health Survey 2004. Geneva, Switzerland: World Health Organization (WHO), 2005.                                                                                                                                                                                                                                   |   |     | X | 52  |   | 15-95    | Both |
| Germany | 2006                                                 | Börsch-Supan, A. (2013). Survey of Health, Ageing and Retirement in Europe (SHARE) Wave 1. Release version: 2.6.0. SHARE-ERIC. Data set. DOI: 10.6103/SHARE.w1.260                                                                                                                                                                                               | X | 52  | X | 52  |   | All ages | Both |
| Germany | 2009                                                 | Robert Koch Institute. Germany Health Update 2009-2010. Berlin, Germany: Robert Koch Institute.                                                                                                                                                                                                                                                                  | X | 52  | X | 52  |   | 5-20     | Both |
| Germany | 2010                                                 | Börsch-Supan, A. (2013). Survey of Health, Ageing and Retirement in Europe (SHARE) Wave 2. Release version: 2.6.0. SHARE-ERIC. Data set. DOI: 10.6103/SHARE.w2.260                                                                                                                                                                                               | X | 52  | X | 52  |   | 30-100+  | Both |
| Germany | 2011                                                 | ISSP Research Group (2009): International Social Survey Programme: Health and Health Care - ISSP 2011. GESIS Data Archive, Cologne. ZA5800 Data file version 3.0.0, doi:10.4232/1.12252.                                                                                                                                                                         | X | 52  |   |     |   | All ages | Both |
| Germany | 2012                                                 | Börsch-Supan, A. (2013). Survey of Health, Ageing and Retirement in Europe (SHARE) Wave 4. Release version: 1.1.1. SHARE-ERIC. Data set. DOI: 10.6103/SHARE.w4.111                                                                                                                                                                                               | X | 52  | X | 52  |   | 40-100+  | Both |
| Germany | 2013                                                 | Börsch-Supan, A. (2015). Survey of Health, Ageing and Retirement in Europe (SHARE) Wave 5. Release version: 1.0.0. SHARE-ERIC. Data set. DOI: 10.6103/SHARE.w5.100                                                                                                                                                                                               | X | 52  | X | 52  |   | All ages | Both |
| Germany | 2013                                                 | Federal Statistical Office (Germany). Germany Federal Health Reporting Hospital Discharges 2013.                                                                                                                                                                                                                                                                 |   |     | X |     | X | All ages | Both |
| Germany | 2014                                                 | Federal Statistical Office (Germany). Germany Federal Health Reporting Hospital Discharges 2014.                                                                                                                                                                                                                                                                 |   |     | X |     | X | All ages | Both |
| Ghana   | 1991                                                 | Ghana Statistical Service. Ghana Living Standards Measurement Survey 1991-1992. Accra, Ghana: Ghana Statistical Service.                                                                                                                                                                                                                                         | X | 2   | X | 2   |   | All ages | Both |
| Ghana   | 1997, 2004                                           | Ghana Statistical Service, World Bank. Ghana Core Welfare Indicators Survey 1997.                                                                                                                                                                                                                                                                                | X | 4   |   |     |   | All ages | Both |
| Ghana   | 1998                                                 | Ghana Statistical Service. Ghana Living Standards Survey 1998-1999.                                                                                                                                                                                                                                                                                              | X | 2   | X | 2   |   | 5-100+   | Both |
| Ghana   | 2003                                                 | World Health Organization (WHO). Ghana World Health Survey 2003. Geneva, Switzerland: World Health Organization (WHO), 2005.                                                                                                                                                                                                                                     |   |     | X | 52  |   | All ages | Both |
| Ghana   | 2005                                                 | Ghana Statistical Service. Ghana Living Standards Measurement Survey 2005-2006. Accra, Ghana: Ghana Statistical Service.                                                                                                                                                                                                                                         | X | 2   | X | 2   |   | 1-100+   | Both |
| Ghana   | 2005                                                 | World Health Organization (2005). Study on Global Ageing and Adult Health (SAGE), Pilot Study, 2005 (Data Set 27-28, Cunningham, Shayna.) [machine-readable data file and documentation]. Geneva, Switzerland: World Health Organization (Producer). Los Altos, CA: Sociometrics Corporation, Data Archive of Social Research on Aging (Producer & Distributor). | X | 52  |   |     |   | All ages | Both |
| Ghana   | 2007                                                 | Ghana Health Service, Ministry of Health (Ghana), University of Ghana, World Health Organization (WHO). Ghana WHO Study on Global AGEing and Adult Health 2007-2008.                                                                                                                                                                                             | X | 52  |   |     |   | 15-100+  | Both |
| Ghana   | 2012                                                 | Ghana Statistical Service, World Bank. Ghana Living Standards Measurement Survey 2012-2013. Accra, Ghana: Ghana Statistical Service.                                                                                                                                                                                                                             | X | 2   | X | 2   |   | All ages | Both |

|           |                                                                                                                                                                                                                                                            |                                                                                                                                                                                                                                                                                         |   |     |   |     |   |          |        |
|-----------|------------------------------------------------------------------------------------------------------------------------------------------------------------------------------------------------------------------------------------------------------------|-----------------------------------------------------------------------------------------------------------------------------------------------------------------------------------------------------------------------------------------------------------------------------------------|---|-----|---|-----|---|----------|--------|
| Greece    | 1971, 1972, 1973, 1974, 1975, 1976, 1977, 1978, 1979, 1980, 1981, 1982, 1983, 1984, 1985, 1986, 1987, 1988, 1989, 1990, 1991, 1992, 1993, 1994, 1995, 1996, 1997, 1998, 1999, 2000, 2001, 2002, 2003, 2004, 2005, 2006, 2007, 2008, 2009, 2010, 2011, 2012 | World Health Organization Regional Office for Europe (WHO/Europe). European Health for All Database - Inpatient Care Discharges Per 100. Copenhagen, Denmark: World Health Organization Regional Office for Europe (WHO/Europe).                                                        |   |     | X |     | X | All ages | Both   |
| Greece    | 1999, 2000, 2001, 2002, 2003, 2004, 2005, 2006, 2007                                                                                                                                                                                                       | World Health Organization Regional Office for Europe (WHO/Europe). European Health for All Database - Outpatient Contacts Per Person Per Year. Copenhagen, Denmark: World Health Organization Regional Office for Europe (WHO/Europe).                                                  | X |     |   |     | X | All ages | Both   |
| Greece    | 2000                                                                                                                                                                                                                                                       | National School of Public Health (Greece), World Health Organization (WHO). Greece WHO Multi-country Survey Study on Health and Health System Responsiveness 2000-2001.                                                                                                                 | X | 4.3 | X | 4.3 |   | 0-95     | Both   |
| Greece    | 2003                                                                                                                                                                                                                                                       | World Health Organization (WHO). Greece World Health Survey 2003. Geneva, Switzerland: World Health Organization (WHO), 2005.                                                                                                                                                           |   |     | X | 52  |   | 15-100+  | Both   |
| Greece    | 2006                                                                                                                                                                                                                                                       | Börsch-Supan, A. (2013). Survey of Health, Ageing and Retirement in Europe (SHARE) Wave 1. Release version: 2.6.0. SHARE-ERIC. Data set. DOI: 10.6103/SHARE.w1.260                                                                                                                      | X | 52  | X | 52  |   | All ages | Both   |
| Greece    | 2010                                                                                                                                                                                                                                                       | Börsch-Supan, A. (2013). Survey of Health, Ageing and Retirement in Europe (SHARE) Wave 2. Release version: 2.6.0. SHARE-ERIC. Data set. DOI: 10.6103/SHARE.w2.260                                                                                                                      | X | 52  | X | 52  |   | 35-100+  | Both   |
| Guatemala | 2003                                                                                                                                                                                                                                                       | World Health Organization (WHO). Guatemala World Health Survey 2003. Geneva, Switzerland: World Health Organization (WHO), 2005.                                                                                                                                                        |   |     | X | 52  |   | All ages | Both   |
| Guatemala | 2008                                                                                                                                                                                                                                                       | Guatemala Ministry of Health and Social Assistance, University of Valle and Division of Reproductive Health-Centers for Disease Control and Prevention (CDC). Guatemala Reproductive Health Survey 2008-2009. Atlanta, United States: Centers for Disease Control and Prevention (CDC). | X | 4   |   |     |   | 0-50     | Female |
| Guyana    | 1992                                                                                                                                                                                                                                                       | Bureau of Statistics (Guyana), World Bank. Guyana Living Standards Measurement Survey 1992-1993.                                                                                                                                                                                        | X | 4.3 | X | 4.3 |   | All ages | Both   |
| Haiti     | 2001                                                                                                                                                                                                                                                       | Haitian Institute of Statistics and Informatics, The Fafo Research Foundation. Haiti Living Condition Survey 2001, Haiti: Haitian Institute of Statistics and Informatics.                                                                                                              | X | 2   |   |     |   | 15-100+  | Both   |
| Hungary   | 1991                                                                                                                                                                                                                                                       |                                                                                                                                                                                                                                                                                         |   |     | X |     | X | All ages | Both   |
| Hungary   | 1992                                                                                                                                                                                                                                                       |                                                                                                                                                                                                                                                                                         |   |     | X |     | X | All ages | Both   |
| Hungary   | 1993                                                                                                                                                                                                                                                       |                                                                                                                                                                                                                                                                                         |   |     | X |     | X | All ages | Both   |
| Hungary   | 1994                                                                                                                                                                                                                                                       |                                                                                                                                                                                                                                                                                         |   |     | X |     | X | All ages | Both   |
| Hungary   | 1995                                                                                                                                                                                                                                                       |                                                                                                                                                                                                                                                                                         |   |     | X |     | X | All ages | Both   |
| Hungary   | 1996                                                                                                                                                                                                                                                       |                                                                                                                                                                                                                                                                                         |   |     | X |     | X | All ages | Both   |
| Hungary   | 1997                                                                                                                                                                                                                                                       |                                                                                                                                                                                                                                                                                         |   |     | X |     | X | All ages | Both   |

|         |                                                                                          |                                                                                                                                                                                                                                        |   |     |   |     |   |          |      |
|---------|------------------------------------------------------------------------------------------|----------------------------------------------------------------------------------------------------------------------------------------------------------------------------------------------------------------------------------------|---|-----|---|-----|---|----------|------|
| Hungary | 1998                                                                                     |                                                                                                                                                                                                                                        |   |     | X |     | X | All ages | Both |
| Hungary | 1999, 2000                                                                               | World Health Organization Regional Office for Europe (WHO/Europe). European Health for All Database - Outpatient Contacts Per Person Per Year. Copenhagen, Denmark: World Health Organization Regional Office for Europe (WHO/Europe). | X |     |   |     | X | All ages | Both |
| Hungary | 1999                                                                                     |                                                                                                                                                                                                                                        |   |     | X |     | X | All ages | Both |
| Hungary | 2000                                                                                     | Health Promotion Research Institute (Hungary), Hungarian Gallup Institute. Hungary National Population Health Survey 2000.                                                                                                             | X | 52  | X | 52  |   | 15-100+  | Both |
| Hungary | 2000                                                                                     | Szonda Ipsos, World Health Organization (WHO). Hungary WHO Multi-country Survey Study on Health and Health System Responsiveness 2000-2001. Geneva, Switzerland: World Health Organization (WHO).                                      | X | 4.3 | X | 4.3 |   | All ages | Both |
| Hungary | 2000                                                                                     |                                                                                                                                                                                                                                        |   |     | X |     | X | All ages | Both |
| Hungary | 2001, 2002, 2003, 2004, 2005, 2006, 2007, 2008, 2009, 2010, 2011, 2012, 2013, 2014, 2015 | Organization for Economic Co-operation and Development (OECD). OECD Health Statistics. Paris, France: Organization for Economic Co-operation and Development (OECD).                                                                   | X |     |   |     | X | All ages | Both |
| Hungary | 2001                                                                                     |                                                                                                                                                                                                                                        |   |     | X |     | X | All ages | Both |
| Hungary | 2002                                                                                     |                                                                                                                                                                                                                                        |   |     | X |     | X | All ages | Both |
| Hungary | 2003, 2004, 2005, 2006, 2007, 2009, 2010, 2011                                           | World Health Organization Regional Office for Europe (WHO/Europe). European Hospital Morbidity Database 1999-2007. Copenhagen, Denmark: World Health Organization Regional Office for Europe (WHO/Europe).                             |   |     | X |     | X | All ages | Both |
| Hungary | 2003                                                                                     | World Health Organization (WHO). Hungary World Health Survey 2003. Geneva, Switzerland: World Health Organization (WHO), 2005.                                                                                                         |   |     | X | 52  |   | 15-100+  | Both |
| Hungary | 2003                                                                                     |                                                                                                                                                                                                                                        |   |     | X |     | X | All ages | Both |
| Hungary | 2004                                                                                     |                                                                                                                                                                                                                                        |   |     | X |     | X | All ages | Both |
| Hungary | 2012                                                                                     | Börsch-Supan, A. (2013). Survey of Health, Ageing and Retirement in Europe (SHARE) Wave 4. Release version: 1.1.1. SHARE-ERIC. Data set. DOI: 10.6103/SHARE.w4.111                                                                     | X | 52  | X | 52  |   | 25-100+  | Both |
| Hungary | 2014                                                                                     | National Institute for Strategic Health Research (Hungary). Hungary Hospital Inpatient Discharges 2012.                                                                                                                                |   |     | X |     | X | All ages | Both |
| Hungary | 2015                                                                                     | National Institute for Strategic Health Research (Hungary). Hungary Hospital Inpatient Discharges 2012.                                                                                                                                |   |     | X |     | X | All ages | Both |
| Iceland | 1988                                                                                     | Directorate of Health (Iceland). Iceland Hospital Data Registry 1988.                                                                                                                                                                  |   |     | X |     | X | All ages | Both |
| Iceland | 1989                                                                                     | Directorate of Health (Iceland). Iceland Hospital Data Registry 1989.                                                                                                                                                                  |   |     | X |     | X | All ages | Both |
| Iceland | 1990                                                                                     | Directorate of Health (Iceland). Iceland Hospital Data Registry 1990.                                                                                                                                                                  |   |     | X |     | X | All ages | Both |
| Iceland | 1991                                                                                     | Directorate of Health (Iceland). Iceland Hospital Data Registry 1991.                                                                                                                                                                  |   |     | X |     | X | All ages | Both |
| Iceland | 1992                                                                                     | Directorate of Health (Iceland). Iceland Hospital Data Registry 1992.                                                                                                                                                                  |   |     | X |     | X | All ages | Both |
| Iceland | 1993                                                                                     | Directorate of Health (Iceland). Iceland Hospital Data Registry 1993.                                                                                                                                                                  |   |     | X |     | X | All ages | Both |
| Iceland | 1994                                                                                     | Directorate of Health (Iceland). Iceland Hospital Data Registry 1994.                                                                                                                                                                  |   |     | X |     | X | All ages | Both |
| Iceland | 1995                                                                                     | Directorate of Health (Iceland). Iceland Hospital Data Registry 1995.                                                                                                                                                                  |   |     | X |     | X | All ages | Both |
| Iceland | 1998                                                                                     | Directorate of Health (Iceland). Iceland Hospital Data Registry 1998.                                                                                                                                                                  | X |     |   |     | X | All ages | Both |
| Iceland | 1999, 2001, 2002, 2003, 2004, 2005, 2006, 2007                                           | World Health Organization Regional Office for Europe (WHO/Europe). European Hospital Morbidity Database 1999-2007. Copenhagen, Denmark: World Health Organization Regional Office for Europe (WHO/Europe).                             |   |     | X |     | X | All ages | Both |
| Iceland | 1999                                                                                     | Directorate of Health (Iceland). Iceland Hospital Data Registry 1999.                                                                                                                                                                  | X |     | X |     | X | All ages | Both |
| Iceland | 2000                                                                                     | International Research Associates (INRA) Europe, World Health Organization (WHO). Iceland WHO Multi-country Survey Study on Health and Health System Responsiveness 2000-2001. Geneva, Switzerland: World Health Organization (WHO).   | X | 4.3 | X | 4.3 |   | 15-85    | Both |

|           |                                                                                          |                                                                                                                                                                                                                                                                                                                                                                  |   |      |   |     |   |          |        |
|-----------|------------------------------------------------------------------------------------------|------------------------------------------------------------------------------------------------------------------------------------------------------------------------------------------------------------------------------------------------------------------------------------------------------------------------------------------------------------------|---|------|---|-----|---|----------|--------|
| Iceland   | 2001, 2002, 2003, 2004, 2005, 2006, 2007, 2008, 2009, 2010, 2011, 2012, 2013, 2014, 2015 | Organization for Economic Co-operation and Development (OECD). OECD Health Statistics. Paris, France: Organization for Economic Co-operation and Development (OECD).                                                                                                                                                                                             | X |      |   |     | X | All ages | Both   |
| Iceland   | 2008                                                                                     | Directorate of Health (Iceland). Iceland Hospital Data Registry 2008.                                                                                                                                                                                                                                                                                            |   |      |   | X   | X | All ages | Both   |
| Iceland   | 2010                                                                                     | Directorate of Health (Iceland). Iceland Hospital Data Registry 2010.                                                                                                                                                                                                                                                                                            |   |      |   | X   | X | All ages | Both   |
| Iceland   | 2011                                                                                     | Directorate of Health (Iceland). Iceland Hospital Data Registry 2011.                                                                                                                                                                                                                                                                                            |   |      |   | X   | X | All ages | Both   |
| Iceland   | 2012                                                                                     | Directorate of Health (Iceland). Iceland Hospital Data Registry 2012.                                                                                                                                                                                                                                                                                            |   |      |   | X   | X | All ages | Both   |
| Iceland   | 2013                                                                                     | Directorate of Health (Iceland). Iceland Hospital Data Registry 2013.                                                                                                                                                                                                                                                                                            |   |      |   | X   | X | All ages | Both   |
| Iceland   | 2014                                                                                     | Directorate of Health (Iceland). Iceland Hospital Data Registry 2014.                                                                                                                                                                                                                                                                                            |   |      |   | X   | X | All ages | Both   |
| India     | 1995                                                                                     | Ministry of Statistics and Programme Implementation (India). India National Sample Survey Round 52 1995-1996. New Delhi, India: Ministry of Statistics and Programme Implementation (India).                                                                                                                                                                     | X | 2.1  | X | 52  |   | All ages | Both   |
| India     | 1997                                                                                     | World Bank. India - Uttar Pradesh and Bihar Survey of Living Conditions 1997-1998. Washington DC, United States: World Bank.                                                                                                                                                                                                                                     | X | 4.3  |   |     |   | All ages | Both   |
| India     | 1998                                                                                     | International Institute for Population Sciences (IIPS) (India), Ministry of Health and Family Welfare (India). India District Level Household Survey 1998-1999 (DLHS). Mumbai, India: International Institute for Population Sciences (IIPS) (India).                                                                                                            | X | 12.9 |   |     |   | 0-45     | Female |
| India     | 2000                                                                                     | Institute of Health Systems (India), World Health Organization (WHO). India - Andhra Pradesh WHO Multi-country Survey Study on Health and Health System Responsiveness 2000-2001.                                                                                                                                                                                | X | 4.3  | X | 4.3 |   | All ages | Both   |
| India     | 2003                                                                                     | International Institute for Population Sciences (India), World Health Organization (WHO). India World Health Survey 2003. Geneva, Switzerland: World Health Organization (WHO), 2005.                                                                                                                                                                            |   |      | X | 52  |   | All ages | Both   |
| India     | 2004                                                                                     | Ministry of Statistics and Programme Implementation (India). India National Sample Survey Round 60 2004. New Delhi, India: Ministry of Statistics and Programme Implementation (India).                                                                                                                                                                          | X | 2.1  | X | 52  |   | All ages | Both   |
| India     | 2005                                                                                     | World Health Organization (2005). Study on Global Ageing and Adult Health (SAGE). Pilot Study, 2005 (Data Set 27-28, Cunningham, Shayna.) [machine-readable data file and documentation]. Geneva, Switzerland: World Health Organization (Producer). Los Altos, CA: Sociometrics Corporation, Data Archive of Social Research on Aging (Producer & Distributor). | X | 52   |   |     |   | 20-100+  | Both   |
| India     | 2007                                                                                     | International Institute for Population Sciences (India), World Health Organization (WHO). India WHO Study on Global Ageing and Adult Health 2007. Geneva, Switzerland: World Health Organization (WHO), 2007.                                                                                                                                                    | X | 52   | X | 52  |   | 15-100+  | Both   |
| India     | 2014                                                                                     | Government of India, Ministry of Statistics and Programme Implementation (India). India National Sample Survey Round 71 2014. New Delhi, India: Ministry of Statistics and Programme Implementation (India).                                                                                                                                                     | X | 2.1  | X | 52  |   | All ages | Both   |
| Indonesia | 1992                                                                                     | Central Bureau of Statistics (Indonesia). Indonesia National Socioeconomic Survey 1992.                                                                                                                                                                                                                                                                          | X | 4.3  | X | 4.3 |   | All ages | Both   |
| Indonesia | 1993                                                                                     | RAND Corporation, University of Indonesia. Indonesia Family Life Survey 1993-1994. Santa Monica, United States: RAND Corporation.                                                                                                                                                                                                                                | X | 4    | X | 52  |   | 10-100+  | Both   |
| Indonesia | 1993                                                                                     | Central Bureau of Statistics (Indonesia). Indonesia National Socioeconomic Survey 1993.                                                                                                                                                                                                                                                                          | X | 4.3  | X | 4.3 |   | All ages | Both   |
| Indonesia | 1994                                                                                     | Central Bureau of Statistics (Indonesia). Indonesia National Socioeconomic Survey 1994.                                                                                                                                                                                                                                                                          | X | 4.3  | X | 4.3 |   | All ages | Both   |
| Indonesia | 1995                                                                                     | Central Bureau of Statistics (Indonesia), Ministry of Health (Indonesia), United Nations Children's Fund (UNICEF). Indonesia National Socioeconomic Survey 1995.                                                                                                                                                                                                 | X | 4.3  | X | 4.3 |   | All ages | Both   |
| Indonesia | 1996                                                                                     | Central Bureau of Statistics (Indonesia), Ministry of Health (Indonesia), United Nations Children's Fund (UNICEF). Indonesia National Socioeconomic Survey 1996.                                                                                                                                                                                                 | X | 4.3  | X | 4.3 |   | All ages | Both   |
| Indonesia | 1997                                                                                     | Central Bureau of Statistics (Indonesia), Ministry of Health (Indonesia), United Nations Children's Fund (UNICEF). Indonesia National Socioeconomic Survey 1997.                                                                                                                                                                                                 | X | 4.3  | X | 4.3 |   | All ages | Both   |
| Indonesia | 1998                                                                                     | Central Bureau of Statistics (Indonesia), Ministry of Health (Indonesia), World Bank. Indonesia National Socioeconomic Survey 1998.                                                                                                                                                                                                                              | X | 4.3  |   |     |   | All ages | Both   |
| Indonesia | 1999                                                                                     | Central Bureau of Statistics (Indonesia), Ministry of Health (Indonesia), World Bank. Indonesia National Socioeconomic Survey 1999.                                                                                                                                                                                                                              | X | 4.3  |   |     |   | All ages | Both   |
| Indonesia | 2000                                                                                     | Central Bureau of Statistics (Indonesia), Ministry of Health (Indonesia), World Bank. Indonesia National Socioeconomic Survey 2000.                                                                                                                                                                                                                              | X | 4.3  | X | 4.3 |   | All ages | Both   |

|           |      |                                                                                                                                                                                                                                   |   |     |   |     |   |          |      |
|-----------|------|-----------------------------------------------------------------------------------------------------------------------------------------------------------------------------------------------------------------------------------|---|-----|---|-----|---|----------|------|
| Indonesia | 2000 | Institute of Health Systems (India), World Health Organization (WHO). India - Andhra Pradesh WHO Multi-country Survey Study on Health and Health System Responsiveness 2000-2001.                                                 | X | 4.3 | X | 4.3 |   | All ages | Both |
| Indonesia | 2001 | Central Bureau of Statistics (Indonesia), Ministry of Health (Indonesia), World Bank. Indonesia National Socioeconomic Survey 2001.                                                                                               | X | 4.3 | X | 4.3 |   | All ages | Both |
| Indonesia | 2002 | Statistics Indonesia. Indonesia National Socioeconomic Survey 2002.                                                                                                                                                               | X | 4.3 | X | 52  |   | All ages | Both |
| Indonesia | 2004 | Statistics Indonesia. Indonesia National Socioeconomic Survey 2004.                                                                                                                                                               | X | 4   | X | 52  |   | All ages | Both |
| Indonesia | 2005 | Statistics Indonesia. Indonesia National Socioeconomic Survey 2005.                                                                                                                                                               | X | 4   | X | 52  |   | All ages | Both |
| Indonesia | 2006 | Statistics Indonesia. Indonesia National Socioeconomic Survey - Poverty Program Evaluation 2006. Jakarta, Indonesia: Statistics Indonesia.                                                                                        | X | 4   | X | 52  |   | All ages | Both |
| Indonesia | 2007 | Center for Population and Policy Studies, Gadjah Mada University (Indonesia), RAND Corporation, SurveyMETER. Indonesia Family Life Survey 2007-2008. Santa Monica, United States: RAND Corporation.                               | X | 4   |   |     |   | 15-100+  | Both |
| Indonesia | 2007 | National Institute of Health Research and Development (NIHRD), Ministry of Health (Indonesia). Indonesia Basic Health Research 2007-2008.                                                                                         | X | 52  |   |     |   | All ages | Both |
| Indonesia | 2007 | Family Health International, Ministry of Health (Indonesia), National AIDS Commission (KPA), Statistics Indonesia. Indonesia Behavioral Surveillance Survey 2007.                                                                 | X | 4   | X | 52  |   | All ages | Both |
| Indonesia | 2008 | Statistics Indonesia. Indonesia National Socioeconomic Survey 2008.                                                                                                                                                               | X | 4   | X | 52  |   | All ages | Both |
| Indonesia | 2008 | Statistics Indonesia. Indonesia National Socioeconomic Survey - Poverty Program Evaluation 2008-2009. Jakarta, Indonesia: Statistics Indonesia.                                                                                   | X | 4   | X | 52  |   | All ages | Both |
| Indonesia | 2010 | Statistics Indonesia. Indonesia National Socioeconomic Survey 2010.                                                                                                                                                               | X | 4   | X | 52  |   | All ages | Both |
| Indonesia | 2011 | Statistics Indonesia. Indonesia National Socioeconomic Survey 2011.                                                                                                                                                               | X | 4.3 | X | 52  |   | All ages | Both |
| Iran      | 2000 | Ministry of Health and Medical Education (Iran), World Health Organization (WHO). Iran WHO Multi-country Survey Study on Health and Health System Responsiveness 2000-2001. Geneva, Switzerland: World Health Organization (WHO). | X | 4.3 | X | 4.3 |   | All ages | Both |
| Iraq      | 2004 | Central Organization for Statistics and Information Technology (Iraq), The Fafo Research Foundation. Iraq Multiple Indicator Rapid Assessment 2004.                                                                               | X | 2   |   |     |   | All ages | Both |
| Iraq      | 2006 | Central Organization for Statistics and Information Technology (Iraq), Kurdistan Regional Statistics Office, World Bank. Iraq Household Socioeconomic Survey 2006-2007. Washington DC, United States: World Bank.                 | X | 4.3 |   |     |   | All ages | Both |
| Ireland   | 1980 | Department of Health (Ireland), Department of Health and Children (Ireland), Economic and Social Research Institute (ESRI) (Ireland). Ireland Hospital Inpatient Enquiry 1980.                                                    |   |     | X |     | X | All ages | Both |
| Ireland   | 1981 | Department of Health (Ireland), Department of Health and Children (Ireland), Economic and Social Research Institute (ESRI) (Ireland). Ireland Hospital Inpatient Enquiry 1981.                                                    |   |     | X |     | X | All ages | Both |
| Ireland   | 1982 | Department of Health (Ireland), Department of Health and Children (Ireland), Economic and Social Research Institute (ESRI) (Ireland). Ireland Hospital Inpatient Enquiry 1982.                                                    |   |     | X |     | X | All ages | Both |
| Ireland   | 1983 | Department of Health and Children (Ireland), Economic and Social Research Institute (ESRI) (Ireland). Ireland Hospital Inpatient Enquiry 1983.                                                                                    |   |     | X |     | X | All ages | Both |
| Ireland   | 1984 | Department of Health and Children (Ireland), Economic and Social Research Institute (ESRI) (Ireland). Ireland Hospital Inpatient Enquiry 1984.                                                                                    |   |     | X |     | X | All ages | Both |
| Ireland   | 1985 | Department of Health and Children (Ireland), Economic and Social Research Institute (ESRI) (Ireland). Ireland Hospital Inpatient Enquiry 1985.                                                                                    |   |     | X |     | X | All ages | Both |
| Ireland   | 1986 | Department of Health and Children (Ireland), Economic and Social Research Institute (ESRI) (Ireland). Ireland Hospital Inpatient Enquiry 1986.                                                                                    |   |     | X |     | X | All ages | Both |
| Ireland   | 1987 | Department of Health and Children (Ireland), Economic and Social Research Institute (ESRI) (Ireland). Ireland Hospital Inpatient Enquiry 1987.                                                                                    |   |     | X |     | X | All ages | Both |
| Ireland   | 1988 | Department of Health and Children (Ireland), Economic and Social Research Institute (ESRI) (Ireland). Ireland Hospital Inpatient Enquiry 1988.                                                                                    |   |     | X |     | X | All ages | Both |
| Ireland   | 1989 | Department of Health and Children (Ireland), Economic and Social Research Institute (ESRI) (Ireland). Ireland Hospital Inpatient Enquiry 1989.                                                                                    |   |     | X |     | X | All ages | Both |
| Ireland   | 1990 | Department of Health and Children (Ireland), Economic and Social Research Institute (ESRI) (Ireland). Ireland Hospital Inpatient Enquiry 1990.                                                                                    |   |     | X |     | X | All ages | Both |
| Ireland   | 1991 | Department of Health and Children (Ireland), Economic and Social Research Institute (ESRI) (Ireland). Ireland Hospital Inpatient Enquiry 1991.                                                                                    |   |     | X |     | X | All ages | Both |
| Ireland   | 1992 | Department of Health and Children (Ireland), Economic and Social Research Institute (ESRI) (Ireland). Ireland Hospital Inpatient Enquiry 1992.                                                                                    |   |     | X |     | X | All ages | Both |
| Ireland   | 1993 | Department of Health and Children (Ireland), Economic and Social Research Institute (ESRI) (Ireland). Ireland Hospital Inpatient Enquiry 1993.                                                                                    |   |     | X |     | X | All ages | Both |
| Ireland   | 1994 | Department of Health and Children (Ireland), Economic and Social Research Institute (ESRI) (Ireland). Ireland Hospital Inpatient Enquiry 1994.                                                                                    |   |     | X |     | X | All ages | Both |

|         |                                                                  |                                                                                                                                                                                                                                                                                                                                                                                           |   |     |   |     |   |          |      |
|---------|------------------------------------------------------------------|-------------------------------------------------------------------------------------------------------------------------------------------------------------------------------------------------------------------------------------------------------------------------------------------------------------------------------------------------------------------------------------------|---|-----|---|-----|---|----------|------|
| Ireland | 1995                                                             | Department of Health and Children (Ireland), Economic and Social Research Institute (ESRI) (Ireland). Ireland Hospital Inpatient Enquiry 1995.                                                                                                                                                                                                                                            |   |     | X |     | X | All ages | Both |
| Ireland | 1996                                                             | Department of Health and Children (Ireland), Economic and Social Research Institute (ESRI) (Ireland). Ireland Hospital Inpatient Enquiry 1996.                                                                                                                                                                                                                                            |   |     | X |     | X | All ages | Both |
| Ireland | 1997                                                             | Department of Health and Children (Ireland), Economic and Social Research Institute (ESRI) (Ireland). Ireland Hospital Inpatient Enquiry 1997.                                                                                                                                                                                                                                            |   |     | X |     | X | All ages | Both |
| Ireland | 1998                                                             | Department of Health and Children (Ireland), Economic and Social Research Institute (ESRI) (Ireland). Ireland Hospital Inpatient Enquiry 1998.                                                                                                                                                                                                                                            |   |     | X |     | X | All ages | Both |
| Ireland | 1999, 2001, 2002, 2003, 2004, 2005, 2006, 2007, 2009, 2010, 2011 | World Health Organization Regional Office for Europe (WHO/Europe). European Hospital Morbidity Database 1999-2007. Copenhagen, Denmark: World Health Organization Regional Office for Europe (WHO/Europe).                                                                                                                                                                                |   |     | X |     | X | All ages | Both |
| Ireland | 1999                                                             | Department of Health and Children (Ireland), Economic and Social Research Institute (ESRI) (Ireland). Ireland Hospital Inpatient Enquiry 1999.                                                                                                                                                                                                                                            |   |     | X |     | X | All ages | Both |
| Ireland | 2000                                                             | International Research Associates (INRA) Europe, World Health Organization (WHO). Ireland WHO Multi-country Survey Study on Health and Health System Responsiveness 2000-2001. Geneva, Switzerland: World Health Organization (WHO).                                                                                                                                                      | X | 4.3 | X | 4.3 |   | 15-90    | Both |
| Ireland | 2000                                                             | Department of Health (Ireland), Economic and Social Research Institute (ESRI) (Ireland). Ireland Hospital Inpatient Enquiry 2000.                                                                                                                                                                                                                                                         |   |     | X |     | X | All ages | Both |
| Ireland | 2002                                                             | Centre for Health Promotion Studies, National University of Ireland, Galway, Department of Public Health Medicine and Epidemiology, University College Dublin, Health Promotion Unit, Department of Health and Children (Ireland). Ireland Survey of Lifestyle Attitudes and Nutrition 2002. Dublin, Ireland: Health Promotion Unit, Department of Health and Children (Ireland).         | X | 52  |   |     |   | 0-90     | Both |
| Ireland | 2003                                                             | World Health Organization (WHO). Ireland World Health Survey 2003. Geneva, Switzerland: World Health Organization (WHO), 2005.                                                                                                                                                                                                                                                            |   |     | X | 52  |   | 0-95     | Both |
| Ireland | 2007                                                             | Economic and Social Research Institute (ESRI) (Ireland), Health Promotion Unit, Department of Health and Children (Ireland), National University of Ireland, Galway, Royal College of Surgeons in Ireland (RCSI), University College Cork. Ireland Survey of Lifestyle Attitudes and Nutrition 2007. Dublin, Ireland: Health Promotion Unit, Department of Health and Children (Ireland). | X | 52  |   |     |   | All ages | Both |
| Ireland | 2008, 2011, 2016                                                 | World Health Organization Regional Office for Europe (WHO/Europe). European Health for All Database - Outpatient Contacts Per Person Per Year. Copenhagen, Denmark: World Health Organization Regional Office for Europe (WHO/Europe).                                                                                                                                                    | X |     |   |     | X | All ages | Both |
| Ireland | 2010                                                             | Börsch-Supan, A. (2013). Survey of Health, Ageing and Retirement in Europe (SHARE) Wave 2. Release version: 2.6.0. SHARE-ERIC. Data set. DOI: 10.6103/SHARE.w2.260                                                                                                                                                                                                                        | X | 52  | X | 52  |   | 30-100+  | Both |
| Ireland | 2013                                                             | Department of Health and Children (Ireland), Economic and Social Research Institute (ESRI) (Ireland), Health Service Executive (HSE) (Ireland). Ireland Hospital Inpatient Enquiry 2013.                                                                                                                                                                                                  |   |     | X |     | X | All ages | Both |
| Ireland | 2014                                                             | Department of Health and Children (Ireland), Economic and Social Research Institute (ESRI) (Ireland), Health Service Executive (HSE) (Ireland). Ireland Hospital Inpatient Enquiry 2014.                                                                                                                                                                                                  |   |     | X |     | X | All ages | Both |
| Israel  | 1999, 2001, 2002, 2003, 2004, 2005, 2006, 2007, 2009             | World Health Organization Regional Office for Europe (WHO/Europe). European Hospital Morbidity Database 1999-2007. Copenhagen, Denmark: World Health Organization Regional Office for Europe (WHO/Europe).                                                                                                                                                                                |   |     | X |     | X | All ages | Both |
| Israel  | 2001, 2010                                                       | Organization for Economic Co-operation and Development (OECD). OECD Health Statistics. Paris, France: Organization for Economic Co-operation and Development (OECD).                                                                                                                                                                                                                      | X |     |   |     | X | All ages | Both |
| Israel  | 2003                                                             | World Health Organization (WHO). Israel World Health Survey 2003. Geneva, Switzerland: World Health Organization (WHO), 2005.                                                                                                                                                                                                                                                             |   |     | X | 52  |   | 0-95     | Both |
| Israel  | 2006                                                             | Börsch-Supan, A. (2013). Survey of Health, Ageing and Retirement in Europe (SHARE) Wave 1. Release version: 2.6.0. SHARE-ERIC. Data set. DOI: 10.6103/SHARE.w1.260                                                                                                                                                                                                                        | X | 52  | X | 52  |   | 0-95     | Both |
| Israel  | 2010                                                             | Börsch-Supan, A. (2013). Survey of Health, Ageing and Retirement in Europe (SHARE) Wave 2. Release version: 2.6.0. SHARE-ERIC. Data set. DOI: 10.6103/SHARE.w2.260                                                                                                                                                                                                                        | X | 52  | X | 52  |   | 35-100+  | Both |
| Israel  | 2011                                                             | ISSP Research Group (2009): International Social Survey Programme: Health and Health Care - ISSP 2011. GESIS Data Archive, Cologne. ZA5800 Data file version 3.0.0, doi:10.4232/1.12252.                                                                                                                                                                                                  | X | 52  |   |     |   | 0-95     | Both |



|        |                                                            |                                                                                                                                                                                                                                    |   |     |   |     |   |          |      |
|--------|------------------------------------------------------------|------------------------------------------------------------------------------------------------------------------------------------------------------------------------------------------------------------------------------------|---|-----|---|-----|---|----------|------|
| Israel | 2011                                                       | Ministry of Health (Israel). Israel National Hospital Discharge Database 2011.                                                                                                                                                     |   |     | X |     | X | All ages | Both |
| Israel | 2012                                                       | Ministry of Health (Israel). Israel National Hospital Discharge Database 2012.                                                                                                                                                     |   |     | X |     | X | All ages | Both |
| Israel | 2013                                                       | Börsch-Supan, A. (2015). Survey of Health, Ageing and Retirement in Europe (SHARE) Wave 5. Release version: 1.0.0. SHARE-ERIC. Data set. DOI: 10.6103/SHARE.w5.100                                                                 | X | 52  | X | 52  |   | All ages | Both |
| Israel | 2013                                                       | Ministry of Health (Israel). Israel National Hospital Discharge Database 2013.                                                                                                                                                     |   |     | X |     | X | All ages | Both |
| Israel | 2014                                                       | Ministry of Health (Israel). Israel National Hospital Discharge Database 2014.                                                                                                                                                     |   |     | X |     | X | All ages | Both |
| Italy  | 1970                                                       | Ministry of Health (Italy). Italy National Hospital Discharge Database 1970.                                                                                                                                                       |   |     | X |     | X | All ages | Both |
| Italy  | 1971                                                       | Ministry of Health (Italy). Italy National Hospital Discharge Database 1971.                                                                                                                                                       |   |     | X |     | X | All ages | Both |
| Italy  | 1972                                                       | Ministry of Health (Italy). Italy National Hospital Discharge Database 1972.                                                                                                                                                       |   |     | X |     | X | All ages | Both |
| Italy  | 1973                                                       | Ministry of Health (Italy). Italy National Hospital Discharge Database 1973.                                                                                                                                                       |   |     | X |     | X | All ages | Both |
| Italy  | 1974                                                       | Ministry of Health (Italy). Italy National Hospital Discharge Database 1974.                                                                                                                                                       |   |     | X |     | X | All ages | Both |
| Italy  | 1975                                                       | Ministry of Health (Italy). Italy National Hospital Discharge Database 1975.                                                                                                                                                       |   |     | X |     | X | All ages | Both |
| Italy  | 1976                                                       | Ministry of Health (Italy). Italy National Hospital Discharge Database 1976.                                                                                                                                                       |   |     | X |     | X | All ages | Both |
| Italy  | 1977                                                       | Ministry of Health (Italy). Italy National Hospital Discharge Database 1977.                                                                                                                                                       |   |     | X |     | X | All ages | Both |
| Italy  | 1978                                                       | Ministry of Health (Italy). Italy National Hospital Discharge Database 1978.                                                                                                                                                       |   |     | X |     | X | All ages | Both |
| Italy  | 1979                                                       | Ministry of Health (Italy). Italy National Hospital Discharge Database 1979.                                                                                                                                                       |   |     | X |     | X | All ages | Both |
| Italy  | 1980                                                       | Ministry of Health (Italy). Italy National Hospital Discharge Database 1980.                                                                                                                                                       |   |     | X |     | X | All ages | Both |
| Italy  | 1981                                                       | Ministry of Health (Italy). Italy National Hospital Discharge Database 1981.                                                                                                                                                       |   |     | X |     | X | All ages | Both |
| Italy  | 1982                                                       | Ministry of Health (Italy). Italy National Hospital Discharge Database 1982.                                                                                                                                                       |   |     | X |     | X | All ages | Both |
| Italy  | 1983                                                       | Ministry of Health (Italy). Italy National Hospital Discharge Database 1983.                                                                                                                                                       |   |     | X |     | X | All ages | Both |
| Italy  | 1984                                                       | Ministry of Health (Italy). Italy National Hospital Discharge Database 1984.                                                                                                                                                       |   |     | X |     | X | All ages | Both |
| Italy  | 1985                                                       | Ministry of Health (Italy). Italy National Hospital Discharge Database 1985.                                                                                                                                                       |   |     | X |     | X | All ages | Both |
| Italy  | 1986                                                       | Ministry of Health (Italy). Italy National Hospital Discharge Database 1986.                                                                                                                                                       |   |     | X |     | X | All ages | Both |
| Italy  | 1987                                                       | Ministry of Health (Italy). Italy National Hospital Discharge Database 1987.                                                                                                                                                       |   |     | X |     | X | All ages | Both |
| Italy  | 1988                                                       | Ministry of Health (Italy). Italy National Hospital Discharge Database 1988.                                                                                                                                                       |   |     | X |     | X | All ages | Both |
| Italy  | 1989                                                       | Ministry of Health (Italy). Italy National Hospital Discharge Database 1989.                                                                                                                                                       |   |     | X |     | X | All ages | Both |
| Italy  | 1990                                                       | Ministry of Health (Italy). Italy National Hospital Discharge Database 1990.                                                                                                                                                       |   |     | X |     | X | All ages | Both |
| Italy  | 1991                                                       | Ministry of Health (Italy). Italy National Hospital Discharge Database 1991.                                                                                                                                                       |   |     | X |     | X | All ages | Both |
| Italy  | 1992                                                       | Ministry of Health (Italy). Italy National Hospital Discharge Database 1992.                                                                                                                                                       |   |     | X |     | X | All ages | Both |
| Italy  | 1993                                                       | Ministry of Health (Italy). Italy National Hospital Discharge Database 1993.                                                                                                                                                       |   |     | X |     | X | All ages | Both |
| Italy  | 1994                                                       | Ministry of Health (Italy). Italy National Hospital Discharge Database 1994.                                                                                                                                                       |   |     | X |     | X | All ages | Both |
| Italy  | 1995                                                       | Ministry of Health (Italy). Italy National Hospital Discharge Database 1995.                                                                                                                                                       |   |     | X |     | X | All ages | Both |
| Italy  | 1996                                                       | Ministry of Health (Italy). Italy National Hospital Discharge Database 1996.                                                                                                                                                       |   |     | X |     | X | All ages | Both |
| Italy  | 1997                                                       | Ministry of Health (Italy). Italy National Hospital Discharge Database 1997.                                                                                                                                                       |   |     | X |     | X | All ages | Both |
| Italy  | 1998                                                       | Ministry of Health (Italy). Italy National Hospital Discharge Database 1998.                                                                                                                                                       |   |     | X |     | X | All ages | Both |
| Italy  | 1999, 2001, 2002, 2003, 2004, 2005, 2006, 2007, 2009, 2010 | World Health Organization Regional Office for Europe (WHO/Europe). European Hospital Morbidity Database 1999-2007. Copenhagen, Denmark: World Health Organization Regional Office for Europe (WHO/Europe).                         |   |     | X |     | X | All ages | Both |
| Italy  | 1999                                                       | Ministry of Health (Italy). Italy National Hospital Discharge Database 1999.                                                                                                                                                       |   |     | X |     | X | All ages | Both |
| Italy  | 2000                                                       | International Research Associates (INRA) Europe, World Health Organization (WHO). Italy WHO Multi-country Survey Study on Health and Health System Responsiveness 2000-2001. Geneva, Switzerland: World Health Organization (WHO). | X | 4.3 | X | 4.3 |   | 15-95    | Both |
| Italy  | 2000                                                       | Ministry of Health (Italy). Italy National Hospital Discharge Database 2000.                                                                                                                                                       |   |     | X |     | X | All ages | Both |

|         |                                                                                                                                                                              |                                                                                                                                                                                                   |   |     |   |     |   |          |      |
|---------|------------------------------------------------------------------------------------------------------------------------------------------------------------------------------|---------------------------------------------------------------------------------------------------------------------------------------------------------------------------------------------------|---|-----|---|-----|---|----------|------|
| Italy   | 2003                                                                                                                                                                         | World Health Organization (WHO). Italy World Health Survey 2003. Geneva, Switzerland: World Health Organization (WHO), 2005.                                                                      |   |     | X | 52  |   | All ages | Both |
| Italy   | 2006                                                                                                                                                                         | Börsch-Supan, A. (2013). Survey of Health, Ageing and Retirement in Europe (SHARE) Wave 1. Release version: 2.6.0. SHARE-ERIC. Data set. DOI: 10.6103/SHARE.w1.260                                | X | 52  | X | 52  |   | All ages | Both |
| Italy   | 2010                                                                                                                                                                         | Börsch-Supan, A. (2013). Survey of Health, Ageing and Retirement in Europe (SHARE) Wave 2. Release version: 2.6.0. SHARE-ERIC. Data set. DOI: 10.6103/SHARE.w2.260                                | X | 52  | X | 52  |   | 35-100+  | Both |
| Italy   | 2012                                                                                                                                                                         | Börsch-Supan, A. (2013). Survey of Health, Ageing and Retirement in Europe (SHARE) Wave 4. Release version: 1.1.1. SHARE-ERIC. Data set. DOI: 10.6103/SHARE.w4.111                                | X | 52  | X | 52  |   | 35-100+  | Both |
| Italy   | 2012                                                                                                                                                                         | Ministry of Health (Italy). Italy National Hospital Discharge Database 2012.                                                                                                                      |   |     | X |     | X | All ages | Both |
| Italy   | 2013                                                                                                                                                                         | Börsch-Supan, A. (2015). Survey of Health, Ageing and Retirement in Europe (SHARE) Wave 5. Release version: 1.0.0. SHARE-ERIC. Data set. DOI: 10.6103/SHARE.w5.100                                | X | 52  | X | 52  |   | All ages | Both |
| Italy   | 2013                                                                                                                                                                         | Ministry of Health (Italy). Italy National Hospital Discharge Database 2013.                                                                                                                      |   |     | X |     | X | All ages | Both |
| Italy   | 2014                                                                                                                                                                         | Ministry of Health (Italy). Italy National Hospital Discharge Database 2014.                                                                                                                      |   |     | X |     | X | All ages | Both |
| Jamaica | 1990                                                                                                                                                                         | Statistical Institute of Jamaica. Jamaica Survey of Living Conditions 1990. Washington DC, United States: World Bank.                                                                             | X | 4   | X | 4   |   | All ages | Both |
| Jamaica | 1991                                                                                                                                                                         | Planning Institute of Jamaica, Statistical Institute of Jamaica. Jamaica Survey of Living Conditions 1991.                                                                                        | X | 4   | X | 4   |   | All ages | Both |
| Jamaica | 1992                                                                                                                                                                         | Planning Institute of Jamaica, Statistical Institute of Jamaica. Jamaica Survey of Living Conditions 1992.                                                                                        | X | 4   | X | 4   |   | All ages | Both |
| Jamaica | 1993                                                                                                                                                                         | Planning Institute of Jamaica, Statistical Institute of Jamaica. Jamaica Survey of Living Conditions 1993.                                                                                        | X | 4   | X | 4   |   | All ages | Both |
| Jamaica | 1994                                                                                                                                                                         | Planning Institute of Jamaica, Statistical Institute of Jamaica. Jamaica Survey of Living Conditions 1994.                                                                                        | X | 4   | X | 4   |   | All ages | Both |
| Jamaica | 1995                                                                                                                                                                         | Planning Institute of Jamaica, Statistical Institute of Jamaica. Jamaica Survey of Living Conditions 1995.                                                                                        | X | 4   | X | 4   |   | 0-70     | Both |
| Jamaica | 1996                                                                                                                                                                         | Planning Institute of Jamaica, Statistical Institute of Jamaica. Jamaica Survey of Living Conditions 1996.                                                                                        | X | 4   | X | 4   |   | All ages | Both |
| Jamaica | 1997                                                                                                                                                                         | Planning Institute of Jamaica, Statistical Institute of Jamaica. Jamaica Survey of Living Conditions 1997.                                                                                        | X | 4   | X | 4   |   | All ages | Both |
| Jamaica | 1998                                                                                                                                                                         | Planning Institute of Jamaica, Statistical Institute of Jamaica. Jamaica Survey of Living Conditions 1988. Kingston, Jamaica: Planning Institute of Jamaica.                                      | X | 4   | X | 4   |   | All ages | Both |
| Jamaica | 1999                                                                                                                                                                         | Planning Institute of Jamaica, Statistical Institute of Jamaica. Jamaica Survey of Living Conditions 1999.                                                                                        | X | 4   | X | 4   |   | All ages | Both |
| Jamaica | 2000                                                                                                                                                                         | Planning Institute of Jamaica, Statistical Institute of Jamaica. Jamaica Survey of Living Conditions 2000.                                                                                        | X | 4   | X | 4   |   | All ages | Both |
| Japan   | 1975, 1978, 1981, 1984, 1987, 1990, 1992, 1993, 1994, 1995, 1996, 1997, 1998, 1999, 2000, 2001, 2002, 2003, 2004, 2005, 2006, 2007, 2008, 2009, 2010, 2011, 2012, 2013, 2014 | Organization for Economic Co-operation and Development (OECD). OECD Health Statistics. Paris, France: Organization for Economic Co-operation and Development (OECD).                              |   |     | X |     | X | All ages | Both |
| Jordan  | 2000                                                                                                                                                                         | Gallup Europe, World Health Organization (WHO). Jordan WHO Multi-country Survey Study on Health and Health System Responsiveness 2000-2001. Geneva, Switzerland: World Health Organization (WHO). | X | 4.3 | X | 4.3 |   | 15-90    | Both |
| Jordan  | 2007                                                                                                                                                                         | Centers for Disease Control and Prevention (CDC), Ministry of Health (Jordan), World Health Organization (WHO). Jordan STEPS Noncommunicable Disease Risk Factors Survey 2007.                    |   |     | X | 52  |   | 15-100+  | Both |

|            |                                                                                                                                                                                                                        |                                                                                                                                                                                                                                                                                                                                                                                                                                                                                                                                           |   |     |   |     |   |          |      |
|------------|------------------------------------------------------------------------------------------------------------------------------------------------------------------------------------------------------------------------|-------------------------------------------------------------------------------------------------------------------------------------------------------------------------------------------------------------------------------------------------------------------------------------------------------------------------------------------------------------------------------------------------------------------------------------------------------------------------------------------------------------------------------------------|---|-----|---|-----|---|----------|------|
| Kazakhstan | 1981, 1982, 1983, 1984, 1985, 1986, 1987, 1988, 1989, 1990, 1991, 1992, 1993, 1994, 1995, 1996, 1997, 1998, 1999, 2000, 2001, 2002, 2003, 2004, 2005, 2006, 2007, 2008, 2009, 2010, 2011, 2012, 2013, 2014, 2015, 2016 | World Health Organization Regional Office for Europe (WHO/Europe). European Health for All Database - Inpatient Care Discharges Per 100. Copenhagen, Denmark: World Health Organization Regional Office for Europe (WHO/Europe).                                                                                                                                                                                                                                                                                                          |   |     | X |     | X | All ages | Both |
| Kazakhstan | 1996                                                                                                                                                                                                                   | Agency of the Republic of Kazakhstan on Statistics, World Bank. Kazakhstan Living Standards Measurement Survey 1996. Washington DC, United States: World Bank.                                                                                                                                                                                                                                                                                                                                                                            |   |     | X | 4.3 |   | All ages | Both |
| Kazakhstan | 1999, 2000, 2001, 2002, 2003, 2004, 2005, 2006, 2007, 2008, 2009, 2010, 2011, 2012, 2013, 2014, 2015, 2016                                                                                                             | World Health Organization Regional Office for Europe (WHO/Europe). European Health for All Database - Outpatient Contacts Per Person Per Year. Copenhagen, Denmark: World Health Organization Regional Office for Europe (WHO/Europe).                                                                                                                                                                                                                                                                                                    | X |     |   |     | X | All ages | Both |
| Kazakhstan | 2002                                                                                                                                                                                                                   | World Health Organization (WHO). Kazakhstan World Health Survey 2002-2003. Geneva, Switzerland: World Health Organization (WHO), 2005.                                                                                                                                                                                                                                                                                                                                                                                                    |   |     | X | 52  |   | 0-90     | Both |
| Kazakhstan | 2010                                                                                                                                                                                                                   | Center for Study of Public Opinion (Kazakhstan), Concluzia-Prim Center for Survey Methodology (Moldova), Institute for Advanced Studies (Austria), London School of Hygiene and Tropical Medicine, University of Aberdeen. Kazakhstan Health in Times of Transition Household Survey 2010.                                                                                                                                                                                                                                                |   |     | X | 52  |   | 15-100+  | Both |
| Kenya      | 1997                                                                                                                                                                                                                   | Central Bureau of Statistics (Kenya). Kenya Welfare Monitoring Survey III 1997. Nairobi, Kenya: Kenya National Bureau of Statistics.                                                                                                                                                                                                                                                                                                                                                                                                      | X | 4.3 |   |     |   | All ages | Both |
| Kenya      | 2004                                                                                                                                                                                                                   | World Health Organization (WHO). Kenya World Health Survey 2004. Geneva, Switzerland: World Health Organization (WHO), 2005.                                                                                                                                                                                                                                                                                                                                                                                                              |   |     | X | 52  |   | All ages | Both |
| Kenya      | 2007                                                                                                                                                                                                                   | Centers for Disease Control and Prevention (CDC), Kenya Medical Research Institute (KEMRI), Kenya National Bureau of Statistics, Ministry of Public Health and Sanitation (Kenya), National AIDS Control Council (Kenya), National AIDS and STI Control Program (Kenya), National Coordinating Agency for Population and Development (Kenya), National Public Health Laboratory Services, Ministry of Public Health and Sanitation (Kenya), USAID. Kenya AIDS Indicator Survey 2007. Nairobi, Kenya: Kenya National Bureau of Statistics. | X | 4   | X | 26  |   | All ages | Both |
| Kenya      | 2007                                                                                                                                                                                                                   | Abt Associates Inc., Kenya National Bureau of Statistics, Ministry of Health (Kenya). Kenya Household Health Expenditure and Utilization Survey 2007. Nairobi, Kenya: Kenya National Bureau of Statistics.                                                                                                                                                                                                                                                                                                                                | X | 4   | X | 52  |   | All ages | Both |
| Kenya      | 2009, 2010, 2011, 2012                                                                                                                                                                                                 | Action Africa Help International (AAH-I), Institute for Health Metrics and Evaluation (IHME), Ministry of Medical Services (Kenya), Ministry of Public Health and Sanitation (Kenya). Access, Bottlenecks, Costs, and Equity (ABCE) project in Kenya, 2012. Seattle, United States: Institute for Health Metrics and Evaluation (IHME), 2015.                                                                                                                                                                                             |   |     | X |     | X | All ages | Both |

|            |                                                                                                                                                                                                                        |                                                                                                                                                                                                                                                                                                                                            |   |    |   |     |   |          |      |
|------------|------------------------------------------------------------------------------------------------------------------------------------------------------------------------------------------------------------------------|--------------------------------------------------------------------------------------------------------------------------------------------------------------------------------------------------------------------------------------------------------------------------------------------------------------------------------------------|---|----|---|-----|---|----------|------|
| Kenya      | 2012                                                                                                                                                                                                                   | Kenya National Bureau of Statistics, Ministry of Devolution and Planning (Kenya), Ministry of Health (Kenya), National AIDS and STI Control Program (Kenya). Kenya AIDS Indicator Survey 2012-2013. Nairobi, Kenya: Kenya National Bureau of Statistics.                                                                                   | X | 52 |   |     |   | 10-65    | Both |
| Kyrgyzstan | 1981, 1982, 1983, 1984, 1985, 1986, 1987, 1988, 1989, 1990, 1991, 1992, 1993, 1994, 1995, 1996, 1997, 1998, 1999, 2000, 2001, 2002, 2003, 2004, 2005, 2006, 2007, 2008, 2009, 2010, 2011, 2012, 2013, 2014, 2015, 2016 | World Health Organization Regional Office for Europe (WHO/Europe). European Health for All Database - Inpatient Care Discharges Per 100. Copenhagen, Denmark: World Health Organization Regional Office for Europe (WHO/Europe).                                                                                                           |   |    | X |     | X | All ages | Both |
| Kyrgyzstan | 1993                                                                                                                                                                                                                   | Institute of Sociology, Russian Academy of Sciences, Paragon Research, University of North Carolina, World Bank. Kyrgyzstan Living Standards Measurement Survey 1993. Washington DC, United States: World Bank.                                                                                                                            |   |    | X | 4.3 |   | All ages | Both |
| Kyrgyzstan | 1997                                                                                                                                                                                                                   | National Statistical Committee of the Kyrgyz Republic, Research Triangle Institute, Inc. (RTI), World Bank. Kyrgyzstan Living Standards Measurement Survey 1997. Washington DC, United States: World Bank.                                                                                                                                 |   |    | X | 52  |   | All ages | Both |
| Kyrgyzstan | 1998                                                                                                                                                                                                                   | National Statistical Committee of the Kyrgyz Republic, Research Triangle Institute, Inc. (RTI), World Bank. Kyrgyzstan Living Standards Measurement Survey 1998. Washington DC, United States: World Bank.                                                                                                                                 |   |    | X | 52  |   | All ages | Both |
| Kyrgyzstan | 1999, 2000, 2001, 2002, 2003, 2004, 2005, 2006, 2007, 2008, 2009, 2010, 2011, 2012, 2013, 2014, 2015, 2016                                                                                                             | World Health Organization Regional Office for Europe (WHO/Europe). European Health for All Database - Outpatient Contacts Per Person Per Year. Copenhagen, Denmark: World Health Organization Regional Office for Europe (WHO/Europe).                                                                                                     | X |    |   |     | X | All ages | Both |
| Kyrgyzstan | 2000                                                                                                                                                                                                                   | National Statistical Committee of the Kyrgyz Republic, SIAR Research and Consulting (Kyrgyzstan), World Health Organization (WHO). Kyrgyzstan WHO Multi-country Survey Study on Health and Health System Responsiveness 2000-2001. Geneva, Switzerland: World Health Organization (WHO).                                                   |   |    | X | 4.3 |   | 0-95     | Both |
| Kyrgyzstan | 2010                                                                                                                                                                                                                   | Concluzia-Prim Center for Survey Methodology (Moldova), Institute for Advanced Studies (Austria), International Centre for Sociological, Political and Social Psychological Research (Kyrgyzstan), London School of Hygiene and Tropical Medicine, University of Aberdeen. Kyrgyzstan Health in Times of Transition Household Survey 2011. |   |    | X | 52  |   | 15-90    | Both |
| Laos       | 2003                                                                                                                                                                                                                   | World Health Organization (WHO). Laos World Health Survey 2003.                                                                                                                                                                                                                                                                            |   |    | X | 52  |   | 15-100+  | Both |
| Latvia     | 1980                                                                                                                                                                                                                   | Ministry of Health of the Republic of Latvia, National Health Service (Latvia). Latvia Hospital Inpatient Discharges 1980.                                                                                                                                                                                                                 |   |    | X |     | X | All ages | Both |
| Latvia     | 1981                                                                                                                                                                                                                   | Ministry of Health of the Republic of Latvia, National Health Service (Latvia). Latvia Hospital Inpatient Discharges 1981.                                                                                                                                                                                                                 |   |    | X |     | X | All ages | Both |
| Latvia     | 1982                                                                                                                                                                                                                   | Ministry of Health of the Republic of Latvia, National Health Service (Latvia). Latvia Hospital Inpatient Discharges 1982.                                                                                                                                                                                                                 |   |    | X |     | X | All ages | Both |
| Latvia     | 1983                                                                                                                                                                                                                   | Ministry of Health of the Republic of Latvia, National Health Service (Latvia). Latvia Hospital Inpatient Discharges 1983.                                                                                                                                                                                                                 |   |    | X |     | X | All ages | Both |

|        |                                                                                          |                                                                                                                                                                                                                                        |   |     |   |     |   |          |      |
|--------|------------------------------------------------------------------------------------------|----------------------------------------------------------------------------------------------------------------------------------------------------------------------------------------------------------------------------------------|---|-----|---|-----|---|----------|------|
| Latvia | 1984                                                                                     | Ministry of Health of the Republic of Latvia, National Health Service (Latvia). Latvia Hospital Inpatient Discharges 1984.                                                                                                             |   |     | X |     | X | All ages | Both |
| Latvia | 1985                                                                                     | Ministry of Health of the Republic of Latvia, National Health Service (Latvia). Latvia Hospital Inpatient Discharges 1985.                                                                                                             |   |     | X |     | X | All ages | Both |
| Latvia | 1986                                                                                     | Ministry of Health of the Republic of Latvia, National Health Service (Latvia). Latvia Hospital Inpatient Discharges 1986.                                                                                                             |   |     | X |     | X | All ages | Both |
| Latvia | 1987                                                                                     | Ministry of Health of the Republic of Latvia, National Health Service (Latvia). Latvia Hospital Inpatient Discharges 1987.                                                                                                             |   |     | X |     | X | All ages | Both |
| Latvia | 1988                                                                                     | Ministry of Health of the Republic of Latvia, National Health Service (Latvia). Latvia Hospital Inpatient Discharges 1988.                                                                                                             |   |     | X |     | X | All ages | Both |
| Latvia | 1989                                                                                     | Ministry of Health of the Republic of Latvia, National Health Service (Latvia). Latvia Hospital Inpatient Discharges 1989.                                                                                                             |   |     | X |     | X | All ages | Both |
| Latvia | 1990                                                                                     | Ministry of Health of the Republic of Latvia, National Health Service (Latvia). Latvia Hospital Inpatient Discharges 1990.                                                                                                             |   |     | X |     | X | All ages | Both |
| Latvia | 1991                                                                                     | Ministry of Health of the Republic of Latvia, National Health Service (Latvia). Latvia Hospital Inpatient Discharges 1991.                                                                                                             |   |     | X |     | X | All ages | Both |
| Latvia | 1992                                                                                     | Ministry of Health of the Republic of Latvia, National Health Service (Latvia). Latvia Hospital Inpatient Discharges 1992.                                                                                                             |   |     | X |     | X | All ages | Both |
| Latvia | 1993                                                                                     | Ministry of Health of the Republic of Latvia, National Health Service (Latvia). Latvia Hospital Inpatient Discharges 1993.                                                                                                             |   |     | X |     | X | All ages | Both |
| Latvia | 1994                                                                                     | Ministry of Health of the Republic of Latvia, National Health Service (Latvia). Latvia Hospital Inpatient Discharges 1994.                                                                                                             |   |     | X |     | X | All ages | Both |
| Latvia | 1995                                                                                     | Ministry of Health of the Republic of Latvia, National Health Service (Latvia). Latvia Hospital Inpatient Discharges 1995.                                                                                                             |   |     | X |     | X | All ages | Both |
| Latvia | 1996                                                                                     | Ministry of Health of the Republic of Latvia, National Health Service (Latvia). Latvia Hospital Inpatient Discharges 1996.                                                                                                             |   |     | X |     | X | All ages | Both |
| Latvia | 1997                                                                                     | Ministry of Health of the Republic of Latvia, National Health Service (Latvia). Latvia Hospital Inpatient Discharges 1997.                                                                                                             |   |     | X |     | X | All ages | Both |
| Latvia | 1998                                                                                     | Ministry of Health of the Republic of Latvia, National Health Service (Latvia). Latvia Hospital Inpatient Discharges 1998.                                                                                                             |   |     | X |     | X | All ages | Both |
| Latvia | 1999, 2000                                                                               | World Health Organization Regional Office for Europe (WHO/Europe). European Health for All Database - Outpatient Contacts Per Person Per Year. Copenhagen, Denmark: World Health Organization Regional Office for Europe (WHO/Europe). | X |     |   |     | X | All ages | Both |
| Latvia | 1999                                                                                     | Ministry of Health of the Republic of Latvia, National Health Service (Latvia). Latvia Hospital Inpatient Discharges 1999.                                                                                                             |   |     | X |     | X | All ages | Both |
| Latvia | 2000                                                                                     | Gallup Europe, World Health Organization (WHO). Latvia WHO Multi-country Survey Study on Health and Health System Responsiveness 2000-2001. Geneva, Switzerland: World Health Organization (WHO).                                      | X | 4.3 | X | 4.3 |   | 15-100+  | Both |
| Latvia | 2000                                                                                     | Ministry of Health of the Republic of Latvia, National Health Service (Latvia). Latvia Hospital Inpatient Discharges 2000.                                                                                                             |   |     | X |     | X | All ages | Both |
| Latvia | 2001, 2002, 2003, 2004, 2005, 2006, 2007, 2008, 2009, 2010, 2011, 2012, 2013, 2014, 2015 | Organization for Economic Co-operation and Development (OECD). OECD Health Statistics. Paris, France: Organization for Economic Co-operation and Development (OECD).                                                                   | X |     |   |     | X | All ages | Both |
| Latvia | 2001                                                                                     | Ministry of Health of the Republic of Latvia, National Health Service (Latvia). Latvia Hospital Inpatient Discharges 2001.                                                                                                             |   |     | X |     | X | All ages | Both |
| Latvia | 2002                                                                                     | Ministry of Health of the Republic of Latvia, National Health Service (Latvia). Latvia Hospital Inpatient Discharges 2002.                                                                                                             |   |     | X |     | X | All ages | Both |
| Latvia | 2003                                                                                     | World Health Organization (WHO). Latvia World Health Survey 2003. Geneva, Switzerland: World Health Organization (WHO), 2005.                                                                                                          |   |     | X | 52  |   | 0-90     | Both |
| Latvia | 2003                                                                                     | Ministry of Health of the Republic of Latvia, National Health Service (Latvia). Latvia Hospital Inpatient Discharges 2003.                                                                                                             |   |     | X |     | X | All ages | Both |
| Latvia | 2004, 2007                                                                               | World Health Organization Regional Office for Europe (WHO/Europe). European Hospital Morbidity Database 1999-2007. Copenhagen, Denmark: World Health Organization Regional Office for Europe (WHO/Europe).                             |   |     | X |     | X | All ages | Both |
| Latvia | 2004                                                                                     | Ministry of Health of the Republic of Latvia, National Health Service (Latvia). Latvia Hospital Inpatient Discharges 2004.                                                                                                             |   |     | X |     | X | All ages | Both |
| Latvia | 2006                                                                                     | Ministry of Health of the Republic of Latvia, National Health Service (Latvia). Latvia Hospital Inpatient Discharges 2006.                                                                                                             |   |     | X |     | X | All ages | Both |
| Latvia | 2007                                                                                     | Ministry of Health of the Republic of Latvia, National Health Service (Latvia). Latvia Hospital Inpatient Discharges 2007.                                                                                                             |   |     | X |     | X | All ages | Both |
| Latvia | 2008                                                                                     | Ministry of Health of the Republic of Latvia, National Health Service (Latvia). Latvia Hospital Inpatient Discharges 2008.                                                                                                             |   |     | X |     | X | All ages | Both |
| Latvia | 2010                                                                                     | Ministry of Health of the Republic of Latvia, National Health Service (Latvia). Latvia Hospital Inpatient Discharges 2010.                                                                                                             |   |     | X |     | X | All ages | Both |
| Latvia | 2011                                                                                     | Ministry of Health of the Republic of Latvia, National Health Service (Latvia). Latvia Hospital Inpatient Discharges 2011.                                                                                                             |   |     | X |     | X | All ages | Both |
| Latvia | 2012                                                                                     | Ministry of Health of the Republic of Latvia, National Health Service (Latvia). Latvia Hospital Inpatient Discharges 2012.                                                                                                             |   |     | X |     | X | All ages | Both |
| Latvia | 2013                                                                                     | Ministry of Health of the Republic of Latvia, National Health Service (Latvia). Latvia Hospital Inpatient Discharges 2013.                                                                                                             |   |     | X |     | X | All ages | Both |

|            |                                                                                                                                                                                                                                                                              |                                                                                                                                                                                                                                                                                |   |     |   |     |   |          |      |
|------------|------------------------------------------------------------------------------------------------------------------------------------------------------------------------------------------------------------------------------------------------------------------------------|--------------------------------------------------------------------------------------------------------------------------------------------------------------------------------------------------------------------------------------------------------------------------------|---|-----|---|-----|---|----------|------|
| Latvia     | 2014                                                                                                                                                                                                                                                                         | Centre for Disease Prevention and Control (Latvia), Riga Stradiņš University. Latvia Health Behavior Among the Adult Population 2014.                                                                                                                                          | X | 52  | X | 52  |   | 15-64    | Both |
| Latvia     | 2014                                                                                                                                                                                                                                                                         | Ministry of Health of the Republic of Latvia, National Health Service (Latvia). Latvia Hospital Inpatient Discharges 2014.                                                                                                                                                     |   |     | X |     | X | All ages | Both |
| Lebanon    | 2000                                                                                                                                                                                                                                                                         | Ministry of Public Health (Lebanon), World Health Organization (WHO). Lebanon WHO Multi-country Survey Study on Health and Health System Responsiveness 2000-2001.                                                                                                             | X | 4.3 | X | 4.3 |   | All ages | Both |
| Lithuania  | 1971, 1972, 1973, 1974, 1975, 1976, 1977, 1978, 1979, 1980, 1981, 1982, 1983, 1984, 1985, 1986, 1987, 1988, 1989, 1990, 1991, 1992, 1993, 1994, 1995, 1996, 1997, 1998, 1999, 2000, 2001, 2002, 2003, 2004, 2005, 2006, 2007, 2008, 2009, 2010, 2011, 2012, 2013, 2014, 2015 | Organization for Economic Co-operation and Development (OECD). OECD Health Statistics. Paris, France: Organization for Economic Co-operation and Development (OECD).                                                                                                           |   |     | X |     | X | All ages | Both |
| Lithuania  | 1998                                                                                                                                                                                                                                                                         | Health Information Centre, Ministry of Health (Lithuania). Lithuania Annual Report Data for Outpatient Contacts Per Person Per Year 1998.                                                                                                                                      | X |     |   |     | X | All ages | Both |
| Lithuania  | 1999, 2001, 2002, 2003, 2004, 2005, 2006, 2007, 2009, 2010, 2011                                                                                                                                                                                                             | World Health Organization Regional Office for Europe (WHO/Europe). European Hospital Morbidity Database 1999-2007. Copenhagen, Denmark: World Health Organization Regional Office for Europe (WHO/Europe).                                                                     |   |     | X |     | X | All ages | Both |
| Lithuania  | 1999                                                                                                                                                                                                                                                                         | Health Information Centre, Ministry of Health (Lithuania). Lithuania Annual Report Data for Outpatient Contacts Per Person Per Year 1999.                                                                                                                                      | X |     |   |     | X | All ages | Both |
| Lithuania  | 2000                                                                                                                                                                                                                                                                         | Biomedical Engineering Institute, Kaunas University of Technology, Statistics Lithuania, World Health Organization (WHO). Lithuania WHO Multi-country Survey Study on Health and Health System Responsiveness 2000-2001. Geneva, Switzerland: World Health Organization (WHO). | X | 4.3 | X | 4.3 |   | All ages | Both |
| Lithuania  | 2011                                                                                                                                                                                                                                                                         | ISSP Research Group (2009): International Social Survey Programme: Health and Health Care - ISSP 2011. GESIS Data Archive, Cologne. ZA5800 Data file version 3.0.0, doi:10.4232/1.12252.                                                                                       | X | 52  |   |     |   | 0-90     | Both |
| Luxembourg | 2000                                                                                                                                                                                                                                                                         | International Research Associates (INRA) Europe, World Health Organization (WHO). Luxembourg WHO Multi-country Survey Study on Health and Health System Responsiveness 2000-2001. Geneva, Switzerland: World Health Organization (WHO).                                        | X | 4.3 | X | 4.3 |   | 15-85    | Both |
| Luxembourg | 2001, 2002, 2003, 2004, 2005, 2006, 2007, 2009                                                                                                                                                                                                                               | World Health Organization Regional Office for Europe (WHO/Europe). European Hospital Morbidity Database 1999-2007. Copenhagen, Denmark: World Health Organization Regional Office for Europe (WHO/Europe).                                                                     |   |     | X |     | X | All ages | Both |

|            |                                                                              |                                                                                                                                                                                                                                        |   |    |   |    |   |          |      |
|------------|------------------------------------------------------------------------------|----------------------------------------------------------------------------------------------------------------------------------------------------------------------------------------------------------------------------------------|---|----|---|----|---|----------|------|
|            | 2010, 2011                                                                   |                                                                                                                                                                                                                                        |   |    |   |    |   |          |      |
| Luxembourg | 2003                                                                         | World Health Organization (WHO). Luxembourg World Health Survey 2003. Geneva, Switzerland: World Health Organization (WHO), 2005.                                                                                                      |   |    | X | 52 |   | 15-95    | Both |
| Luxembourg | 2004, 2005, 2006, 2007, 2008, 2009, 2010, 2011, 2012, 2013, 2014, 2015       | Organization for Economic Co-operation and Development (OECD). OECD Health Statistics. Paris, France: Organization for Economic Co-operation and Development (OECD).                                                                   | X |    |   |    | X | All ages | Both |
| Luxembourg | 2013                                                                         | Börsch-Supan, A. (2015). Survey of Health, Ageing and Retirement in Europe (SHARE) Wave 5. Release version: 1.0.0. SHARE-ERIC. Data set. DOI: 10.6103/SHARE.w5.100                                                                     | X | 52 | X | 52 |   | All ages | Both |
| Luxembourg | 2014, 2015                                                                   | World Health Organization Regional Office for Europe (WHO/Europe). European Health for All Database - Inpatient Care Discharges Per 100. Copenhagen, Denmark: World Health Organization Regional Office for Europe (WHO/Europe).       |   |    | X |    | X | All ages | Both |
| Macedonia  | 1980                                                                         | Institute of Public Health (Macedonia). Macedonia Hospital Inpatient Discharges 1980.                                                                                                                                                  |   |    | X |    | X | All ages | Both |
| Macedonia  | 1982                                                                         | Institute of Public Health (Macedonia). Macedonia Hospital Inpatient Discharges 1982.                                                                                                                                                  |   |    | X |    | X | All ages | Both |
| Macedonia  | 1984                                                                         | Institute of Public Health (Macedonia). Macedonia Hospital Inpatient Discharges 1984.                                                                                                                                                  |   |    | X |    | X | All ages | Both |
| Macedonia  | 1985                                                                         | Institute of Public Health (Macedonia). Macedonia Hospital Inpatient Discharges 1985.                                                                                                                                                  |   |    | X |    | X | All ages | Both |
| Macedonia  | 1986                                                                         | Institute of Public Health (Macedonia). Macedonia Hospital Inpatient Discharges 1986.                                                                                                                                                  |   |    | X |    | X | All ages | Both |
| Macedonia  | 1987                                                                         | Institute of Public Health (Macedonia). Macedonia Hospital Inpatient Discharges 1987.                                                                                                                                                  |   |    | X |    | X | All ages | Both |
| Macedonia  | 1989                                                                         | Institute of Public Health (Macedonia). Macedonia Hospital Inpatient Discharges 1989.                                                                                                                                                  |   |    | X |    | X | All ages | Both |
| Macedonia  | 1990                                                                         | Institute of Public Health (Macedonia). Macedonia Hospital Inpatient Discharges 1990.                                                                                                                                                  |   |    | X |    | X | All ages | Both |
| Macedonia  | 1991                                                                         | Institute of Public Health (Macedonia). Macedonia Hospital Inpatient Discharges 1991.                                                                                                                                                  |   |    | X |    | X | All ages | Both |
| Macedonia  | 1992                                                                         | Institute of Public Health (Macedonia). Macedonia Hospital Inpatient Discharges 1992.                                                                                                                                                  |   |    | X |    | X | All ages | Both |
| Macedonia  | 1993                                                                         | Institute of Public Health (Macedonia). Macedonia Hospital Inpatient Discharges 1993.                                                                                                                                                  |   |    | X |    | X | All ages | Both |
| Macedonia  | 1995                                                                         | Institute of Public Health (Macedonia). Macedonia Hospital Inpatient Discharges 1995.                                                                                                                                                  |   |    | X |    | X | All ages | Both |
| Macedonia  | 1996                                                                         | Institute of Public Health (Macedonia). Macedonia Hospital Inpatient Discharges 1996.                                                                                                                                                  |   |    | X |    | X | All ages | Both |
| Macedonia  | 1997                                                                         | Institute of Public Health (Macedonia). Macedonia Hospital Inpatient Discharges 1997.                                                                                                                                                  |   |    | X |    | X | All ages | Both |
| Macedonia  | 1999, 2000, 2001, 2002, 2003, 2004, 2005, 2006, 2007, 2011, 2012, 2013, 2014 | World Health Organization Regional Office for Europe (WHO/Europe). European Health for All Database - Outpatient Contacts Per Person Per Year. Copenhagen, Denmark: World Health Organization Regional Office for Europe (WHO/Europe). | X |    |   |    | X | All ages | Both |
| Macedonia  | 2000                                                                         | Centers for Public Health (Macedonia). Macedonia Hospital Inpatient Discharges 2000.                                                                                                                                                   |   |    | X |    | X | All ages | Both |
| Macedonia  | 2001                                                                         | Centers for Public Health (Macedonia). Macedonia Hospital Inpatient Discharges 2001.                                                                                                                                                   |   |    | X |    | X | All ages | Both |
| Macedonia  | 2002                                                                         | Centers for Public Health (Macedonia). Macedonia Hospital Inpatient Discharges 2002.                                                                                                                                                   |   |    | X |    | X | All ages | Both |
| Macedonia  | 2004                                                                         | Centers for Public Health (Macedonia). Macedonia Hospital Inpatient Discharges 2004.                                                                                                                                                   |   |    | X |    | X | All ages | Both |
| Macedonia  | 2012                                                                         | Institute of Public Health (Macedonia). Macedonia Hospital Inpatient Discharges 2012.                                                                                                                                                  |   |    | X |    | X | All ages | Both |
| Malawi     | 2003                                                                         | World Health Organization (WHO). Malawi World Health Survey 2003. Geneva, Switzerland: World Health Organization (WHO), 2005.                                                                                                          |   |    | X | 52 |   | All ages | Both |
| Malawi     | 2004                                                                         | National Statistical Office of Malawi, World Bank. Malawi Living Standards Measurement Survey 2004-2005.                                                                                                                               | X | 2  | X | 52 |   | All ages | Both |
| Malawi     | 2010                                                                         | National Statistical Office of Malawi, World Bank. Malawi Living Standards Measurement Survey 2010-2011. Washington DC, United States: World Bank.                                                                                     | X | 2  | X | 52 |   | All ages | Both |

|            |                                                                                                                              |                                                                                                                                                                                                                                                                                                                                                                                                                                                                                                                                                             |   |      |   |     |   |          |      |
|------------|------------------------------------------------------------------------------------------------------------------------------|-------------------------------------------------------------------------------------------------------------------------------------------------------------------------------------------------------------------------------------------------------------------------------------------------------------------------------------------------------------------------------------------------------------------------------------------------------------------------------------------------------------------------------------------------------------|---|------|---|-----|---|----------|------|
| Malawi     | 2013                                                                                                                         | National Statistical Office of Malawi. Malawi Living Standards Measurement Survey 2013. Washington DC, United States: World Bank, 2015.                                                                                                                                                                                                                                                                                                                                                                                                                     |   |      | X | 52  |   | All ages | Both |
| Malaysia   | 2003                                                                                                                         | World Health Organization (WHO). Malaysia World Health Survey 2003. Geneva, Switzerland: World Health Organization (WHO), 2005.                                                                                                                                                                                                                                                                                                                                                                                                                             |   |      | X | 52  |   | All ages | Both |
| Malaysia   | 2006                                                                                                                         | Institute for Public Health, Ministry of Health (Malaysia). Malaysia National Health And Morbidity Survey 2006. Kuala Lumpur, Malaysia: Institute for Public Health, Ministry of Health (Malaysia).                                                                                                                                                                                                                                                                                                                                                         |   |      | X | 52  |   | All ages | Both |
| Malaysia   | 2011                                                                                                                         | Institute for Public Health, Ministry of Health (Malaysia). Malaysia National Health and Morbidity Survey 2011.                                                                                                                                                                                                                                                                                                                                                                                                                                             | X | 52   | X | 52  |   | All ages | Both |
| Mali       | 2003                                                                                                                         | World Health Organization (WHO). Mali World Health Survey 2003. Geneva, Switzerland: World Health Organization (WHO), 2005.                                                                                                                                                                                                                                                                                                                                                                                                                                 |   |      | X | 52  |   | All ages | Both |
| Mali       | 2014                                                                                                                         | Ministry of Rural Development (Mali), National Institute of Statistics (INSTAT) (Mali), World Bank. Mali Living Standards Measurement Study - Integrated Survey on Agriculture 2014-2015. Washington DC, United States: World Bank.                                                                                                                                                                                                                                                                                                                         | X | 4.3  | X | 52  |   | All ages | Both |
| Malta      | 2000                                                                                                                         | International Research Associates (INRA) Europe, World Health Organization (WHO). Malta WHO Multi-country Survey Study on Health and Health System Responsiveness 2000-2001. Geneva, Switzerland: World Health Organization (WHO).                                                                                                                                                                                                                                                                                                                          | X | 4.3  | X | 4.3 |   | 15-95    | Both |
| Malta      | 2005, 2006, 2007, 2009, 2011                                                                                                 | World Health Organization Regional Office for Europe (WHO/Europe). European Hospital Morbidity Database 1999-2007. Copenhagen, Denmark: World Health Organization Regional Office for Europe (WHO/Europe).                                                                                                                                                                                                                                                                                                                                                  |   |      | X |     | X | All ages | Both |
| Mauritania | 2003                                                                                                                         | World Health Organization (WHO). Mauritania World Health Survey 2003. Geneva, Switzerland: World Health Organization (WHO), 2005.                                                                                                                                                                                                                                                                                                                                                                                                                           |   |      | X | 52  |   | All ages | Both |
| Mauritius  | 2003                                                                                                                         | World Health Organization (WHO). Mauritius World Health Survey 2003. Geneva, Switzerland: World Health Organization (WHO), 2005.                                                                                                                                                                                                                                                                                                                                                                                                                            |   |      | X | 52  |   | 15-95    | Both |
| Mexico     | 1995, 1996, 1997, 1998, 1999, 2000, 2001, 2002, 2003, 2004, 2005, 2006, 2007, 2008, 2009, 2010, 2011, 2012, 2013, 2014, 2015 | Organization for Economic Co-operation and Development (OECD). OECD Health Statistics. Paris, France: Organization for Economic Co-operation and Development (OECD).                                                                                                                                                                                                                                                                                                                                                                                        |   |      | X |     | X | All ages | Both |
| Mexico     | 1999                                                                                                                         | National Institute of Public Health (Mexico). Mexico National Health Survey 1999-2000.                                                                                                                                                                                                                                                                                                                                                                                                                                                                      | X | 52   | X | 52  |   | All ages | Both |
| Mexico     | 1999                                                                                                                         | Pan American Health Organization (PAHO), Center for Demography and Ecology, University of Wisconsin-Madison, Inter-University Consortium for Political and Social Research (ICPSR), College of the Northern Border (COLEF), Research in Health and Demographics (INSAD), National Institute of Medical Sciences and Nutrition Salvador Zubirán. Mexico - Mexico City Survey on Health, Well-Being, and Aging in Latin America and the Caribbean 1999-2000. Ann Arbor, United States: Inter-University Consortium for Political and Social Research (ICPSR). | X | 17.2 | X | 26  |   | 50-100+  | Both |
| Mexico     | 2000                                                                                                                         | National Institute of Public Health (Mexico), World Health Organization (WHO). Mexico WHO Multi-country Survey Study on Health and Health System Responsiveness 2000-2001. Geneva, Switzerland: World Health Organization (WHO).                                                                                                                                                                                                                                                                                                                            | X | 4.3  | X | 4.3 |   | All ages | Both |
| Mexico     | 2002                                                                                                                         | Center for Research and Teaching in Economics (CIDE) (Mexico), National Institute of Perinatology (Mexico), National Institute of Statistics and Geography (INEGI) (Mexico), Universidad Iberoamericana. Mexico Family Life Survey 2002.                                                                                                                                                                                                                                                                                                                    | X | 4    | X | 4   |   | All ages | Male |
| Mexico     | 2002                                                                                                                         | World Health Organization (WHO). Mexico World Health Survey 2002-2003. Geneva, Switzerland: World Health Organization (WHO), 2005.                                                                                                                                                                                                                                                                                                                                                                                                                          |   |      | X | 52  |   | All ages | Both |
| Mexico     | 2005                                                                                                                         | National Institute of Public Health (Mexico). Mexico National Survey of Health and Nutrition 2005-2006. Cuernavaca, Mexico: National Institute of Public Health (Mexico).                                                                                                                                                                                                                                                                                                                                                                                   | X | 2    | X | 52  |   | All ages | Both |
| Mexico     | 2005                                                                                                                         | California Center for Population Research (CCPR), University of California Los Angeles (UCLA), Center for Research and Teaching in Economics (CIDE) (Mexico), National Institute of Public Health (Mexico), Universidad Iberoamericana. Mexico Family Life Survey 2005-2006.                                                                                                                                                                                                                                                                                | X | 4    | X | 52  |   | All ages | Both |
| Mexico     | 2008                                                                                                                         | Center for Research and Teaching in Economics (CIDE) (Mexico), Duke University, National Institute of Public Health (Mexico), Universidad Iberoamericana, University of California, Los Angeles (UCLA). Mexico Family Life Survey 2008-2013.                                                                                                                                                                                                                                                                                                                | X | 4    | X | 52  |   | All ages | Both |



|            |                                                                                                                                                                                                                  |                                                                                                                                                                                                                                                                                                                |   |      |   |    |    |          |          |      |
|------------|------------------------------------------------------------------------------------------------------------------------------------------------------------------------------------------------------------------|----------------------------------------------------------------------------------------------------------------------------------------------------------------------------------------------------------------------------------------------------------------------------------------------------------------|---|------|---|----|----|----------|----------|------|
| Mexico     | 2008                                                                                                                                                                                                             | Field Operatives Corporation (Mexico), Ministry of Health (Mexico), National Institute of Public Health (Mexico). Mexico National Survey of Health Spending 2008. Mexico City, Mexico: Ministry of Health (Mexico).                                                                                            | X | 12.9 |   |    |    | All ages | Both     |      |
| Mexico     | 2009                                                                                                                                                                                                             | National Institute of Public Health (Mexico), World Health Organization (WHO). Mexico WHO Study on Global AGEing and Adult Health 2009-2010. Geneva, Switzerland: World Health Organization (WHO), 2011.                                                                                                       | X | 52   |   |    |    | All ages | Both     |      |
| Mexico     | 2010                                                                                                                                                                                                             | National Institute of Statistics and Geography (INEGI) (Mexico). Mexico Household Income and Expenditure Survey 2010. Mexico City, Mexico: National Institute of Statistics and Geography (INEGI) (Mexico).                                                                                                    | X | 12.9 |   |    |    | All ages | Both     |      |
| Mexico     | 2011                                                                                                                                                                                                             | National Institute of Public Health (Mexico). Mexico National Survey of Health and Nutrition 2011-2012. Cuernavaca, Mexico: National Institute of Public Health (Mexico).                                                                                                                                      | X | 2    | X | 52 |    | All ages | Both     |      |
| Mexico     | 2012                                                                                                                                                                                                             | National Institute of Statistics, Geography, and Informatics (Mexico), Population Studies Center, University of Pennsylvania, University of Maryland, University of Wisconsin. Mexico Health and Aging Study 2012. Mexico City, México: National Institute of Statistics, Geography, and Informatics (Mexico). | X | 52   |   |    |    | 35-100+  | Both     |      |
| Moldova    | 1981, 1982, 1983, 1984, 1985, 1986, 1987, 1988, 1989, 1990, 1991, 1992, 1993, 1994, 1995, 1996, 1997, 1998, 1999, 2000, 2001, 2002, 2003, 2004, 2005, 2006, 2007, 2008, 2009, 2010, 2011, 2012, 2013, 2014, 2015 | World Health Organization Regional Office for Europe (WHO/Europe). European Health for All Database - Inpatient Care Discharges Per 100. Copenhagen, Denmark: World Health Organization Regional Office for Europe (WHO/Europe).                                                                               |   |      |   | X  |    | X        | All ages | Both |
| Moldova    | 1999, 2000, 2001, 2002, 2003, 2004, 2005, 2006, 2007, 2008, 2009, 2010, 2011, 2012, 2013, 2014, 2015                                                                                                             | World Health Organization Regional Office for Europe (WHO/Europe). European Health for All Database - Outpatient Contacts Per Person Per Year. Copenhagen, Denmark: World Health Organization Regional Office for Europe (WHO/Europe).                                                                         | X |      |   |    |    | X        | All ages | Both |
| Moldova    | 2010                                                                                                                                                                                                             | Concluzia-Prim Center for Survey Methodology (Moldova), Independent Sociology and Information Service (OPINIA) (Moldova), Institute for Advanced Studies (Austria), London School of Hygiene and Tropical Medicine, University of Aberdeen. Moldova Health in Times of Transition Household Survey 2010.       |   |      |   | X  | 52 |          | 15-95    | Both |
| Montenegro | 2006, 2007, 2008, 2009, 2010, 2011, 2012, 2013, 2014, 2015                                                                                                                                                       | World Health Organization Regional Office for Europe (WHO/Europe). European Health for All Database - Inpatient Care Discharges Per 100. Copenhagen, Denmark: World Health Organization Regional Office for Europe (WHO/Europe).                                                                               |   |      |   | X  |    | X        | All ages | Both |
| Montenegro | 2015                                                                                                                                                                                                             | World Health Organization Regional Office for Europe (WHO/Europe). European Health for All Database - Outpatient Contacts Per Person Per Year. Copenhagen, Denmark: World Health Organization Regional Office for Europe (WHO/Europe).                                                                         | X |      |   |    |    | X        | All ages | Both |

|             |                        |                                                                                                                                                                                                                                                                                                          |   |     |   |     |   |          |      |
|-------------|------------------------|----------------------------------------------------------------------------------------------------------------------------------------------------------------------------------------------------------------------------------------------------------------------------------------------------------|---|-----|---|-----|---|----------|------|
| Morocco     | 1990                   | Directorate of Statistics of the High Commission for Planning (Morocco), World Bank. Morocco Living Standards Measurement Survey 1990-1991.                                                                                                                                                              | X | 4   | X | 52  |   | All ages | Both |
| Morocco     | 2000                   | Gallup Europe, World Health Organization (WHO). Morocco WHO Multi-country Survey Study on Health and Health System Responsiveness 2000-2001. Geneva, Switzerland: World Health Organization (WHO).                                                                                                       | X | 4.3 | X | 4.3 |   | 15-90    | Both |
| Morocco     | 2003                   | World Health Organization (WHO). Morocco World Health Survey 2003. Geneva, Switzerland: World Health Organization (WHO), 2005.                                                                                                                                                                           |   |     | X | 52  |   | 15-100+  | Both |
| Myanmar     | 2003                   | World Health Organization (WHO). Myanmar World Health Survey 2003. Geneva, Switzerland: World Health Organization (WHO), 2005.                                                                                                                                                                           |   |     | X | 52  |   | 15-100+  | Both |
| Namibia     | 2003                   | World Health Organization (WHO). Namibia World Health Survey 2003. Geneva, Switzerland: World Health Organization (WHO), 2005.                                                                                                                                                                           |   |     | X | 52  |   | All ages | Both |
| Nepal       | 2003                   | World Health Organization (WHO). Nepal World Health Survey 2003. Geneva, Switzerland: World Health Organization (WHO), 2005.                                                                                                                                                                             |   |     | X | 52  |   | 15-100+  | Both |
| Nepal       | 2003                   | Central Bureau of Statistics (Nepal), World Bank. Nepal Living Standards Measurement Survey 2003-2004. Kathmandu, Nepal: Central Bureau of Statistics (Nepal).                                                                                                                                           | X | 4.3 |   |     |   | All ages | Both |
| Netherlands | 1990                   | Statistics Netherlands. Netherlands National Medical Registry 1990.                                                                                                                                                                                                                                      |   |     | X |     | X | All ages | Both |
| Netherlands | 1991                   | Statistics Netherlands. Netherlands National Medical Registry 1991.                                                                                                                                                                                                                                      |   |     | X |     | X | All ages | Both |
| Netherlands | 1992                   | Statistics Netherlands. Netherlands National Medical Registry 1992.                                                                                                                                                                                                                                      |   |     | X |     | X | All ages | Both |
| Netherlands | 1993                   | Statistics Netherlands. Netherlands National Medical Registry 1993.                                                                                                                                                                                                                                      |   |     | X |     | X | All ages | Both |
| Netherlands | 1994                   | Statistics Netherlands. Netherlands National Medical Registry 1994.                                                                                                                                                                                                                                      |   |     | X |     | X | All ages | Both |
| Netherlands | 1995                   | Statistics Netherlands. Netherlands National Medical Registry 1995.                                                                                                                                                                                                                                      |   |     | X |     | X | All ages | Both |
| Netherlands | 1996                   | Statistics Netherlands. Netherlands National Medical Registry 1996.                                                                                                                                                                                                                                      |   |     | X |     | X | All ages | Both |
| Netherlands | 1997                   | Statistics Netherlands. Netherlands National Medical Registry 1997.                                                                                                                                                                                                                                      |   |     | X |     | X | All ages | Both |
| Netherlands | 1998                   | Dutch Hospital Data. Netherlands National Medical Registry 1998.                                                                                                                                                                                                                                         |   |     | X |     | X | All ages | Both |
| Netherlands | 1999                   | Dutch Hospital Data. Netherlands National Medical Registry 1999.                                                                                                                                                                                                                                         |   |     | X |     | X | All ages | Both |
| Netherlands | 2000                   | Dutch Hospital Data. Netherlands National Medical Registry 2000.                                                                                                                                                                                                                                         |   |     | X |     | X | All ages | Both |
| Netherlands | 2000                   | International Research Associates (INRA) Europe, Netherlands Organisation for Applied Scientific Research (TNO), World Health Organization (WHO). Netherlands WHO Multi-country Survey Study on Health and Health System Responsiveness 2000-2001. Geneva, Switzerland: World Health Organization (WHO). | X | 4.3 | X | 4.3 |   | 15-95    | Both |
| Netherlands | 2001                   | Dutch Hospital Data. Netherlands National Medical Registry 2001.                                                                                                                                                                                                                                         |   |     | X |     | X | All ages | Both |
| Netherlands | 2002                   | Dutch Hospital Data. Netherlands National Medical Registry 2002.                                                                                                                                                                                                                                         |   |     | X |     | X | All ages | Both |
| Netherlands | 2002                   | Statistics Netherlands. Netherlands Permanent Quality of Life Survey 2002.                                                                                                                                                                                                                               | X | 2   |   |     |   | 0-90     | Both |
| Netherlands | 2003                   | Dutch Hospital Data. Netherlands National Medical Registry 2003.                                                                                                                                                                                                                                         |   |     | X |     | X | All ages | Both |
| Netherlands | 2004, 2007, 2010, 2011 | World Health Organization Regional Office for Europe (WHO/Europe). European Hospital Morbidity Database 1999-2007. Copenhagen, Denmark: World Health Organization Regional Office for Europe (WHO/Europe).                                                                                               |   |     | X |     | X | All ages | Both |
| Netherlands | 2004                   | World Health Organization (WHO). Netherlands World Health Survey 2004. Geneva, Switzerland: World Health Organization (WHO), 2005.                                                                                                                                                                       |   |     | X | 52  |   | 15-85    | Both |
| Netherlands | 2004                   | Dutch Hospital Data. Netherlands National Medical Registry 2004.                                                                                                                                                                                                                                         |   |     | X |     | X | All ages | Both |
| Netherlands | 2004                   | Statistics Netherlands. Netherlands Permanent Quality of Life Survey 2004.                                                                                                                                                                                                                               | X | 2   |   |     |   | 0-90     | Both |
| Netherlands | 2006                   | Börsch-Supan, A. (2013). Survey of Health, Ageing and Retirement in Europe (SHARE) Wave 1. Release version: 2.6.0. SHARE-ERIC. Data set. DOI: 10.6103/SHARE.w1.260                                                                                                                                       | X | 52  | X | 52  |   | All ages | Both |
| Netherlands | 2006                   | Dutch Hospital Data. Netherlands National Medical Registry 2006.                                                                                                                                                                                                                                         |   |     | X |     | X | All ages | Both |
| Netherlands | 2007                   | CentERdata. Netherlands Dutch National Bank Household Survey 2007. Tillburg, Netherlands: CentERdata.                                                                                                                                                                                                    | X | 26  |   |     |   | 15-95    | Both |
| Netherlands | 2007                   | Dutch Hospital Data. Netherlands National Medical Registry 2007.                                                                                                                                                                                                                                         |   |     | X |     | X | All ages | Both |
| Netherlands | 2008                   | CentERdata. Netherlands Dutch National Bank Household Survey 2008. Tillburg, Netherlands: CentERdata.                                                                                                                                                                                                    | X | 26  |   |     |   | 15-95    | Both |
| Netherlands | 2008                   | Statistics Netherlands. Netherlands Permanent Quality of Life Survey 2008.                                                                                                                                                                                                                               | X | 2   |   |     |   | 0-90     | Both |
| Netherlands | 2009                   | CentERdata. Netherlands Dutch National Bank Household Survey 2009. Tillburg, Netherlands: CentERdata.                                                                                                                                                                                                    | X | 26  |   |     |   | 15-95    | Both |
| Netherlands | 2010                   | Börsch-Supan, A. (2013). Survey of Health, Ageing and Retirement in Europe (SHARE) Wave 2. Release version: 2.6.0. SHARE-ERIC. Data set. DOI: 10.6103/SHARE.w2.260                                                                                                                                       | X | 52  | X | 52  |   | 25-100+  | Both |
| Netherlands | 2010                   | Dutch Hospital Data. Netherlands National Medical Registry 2010.                                                                                                                                                                                                                                         |   |     | X |     | X | All ages | Both |

|             |                  |                                                                                                                                                                                                                                         |   |     |   |     |   |          |      |
|-------------|------------------|-----------------------------------------------------------------------------------------------------------------------------------------------------------------------------------------------------------------------------------------|---|-----|---|-----|---|----------|------|
| Netherlands | 2010             | CentERdata. Netherlands Dutch National Bank Household Survey 2010. Tilburg, Netherlands: CentERdata.                                                                                                                                    | X | 26  |   |     |   | 0-90     | Both |
| Netherlands | 2011             | ISSP Research Group (2009): International Social Survey Programme: Health and Health Care - ISSP 2011. GESIS Data Archive, Cologne. ZA5800 Data file version 3.0.0, doi:10.4232/1.12252.                                                | X | 52  |   |     |   | 15-100+  | Both |
| Netherlands | 2011             | CentERdata. Netherlands Dutch National Bank Household Survey 2011. Tilburg, Netherlands: CentERdata.                                                                                                                                    | X | 26  |   |     |   | 0-90     | Both |
| Netherlands | 2012             | Börsch-Supan, A. (2013). Survey of Health, Ageing and Retirement in Europe (SHARE) Wave 4. Release version: 1.1.1. SHARE-ERIC. Data set. DOI: 10.6103/SHARE.w4.111                                                                      | X | 52  | X | 52  |   | 35-100+  | Both |
| Netherlands | 2012             | CentERdata. Netherlands Dutch National Bank Household Survey 2012. Tilburg, Netherlands: CentERdata.                                                                                                                                    | X | 26  |   |     |   | 0-95     | Both |
| Netherlands | 2013             | CentERdata. Netherlands Dutch National Bank Household Survey 2013. Tilburg, Netherlands: CentERdata.                                                                                                                                    | X | 26  |   |     |   | 0-95     | Both |
| Netherlands | 2013             | Börsch-Supan, A. (2015). Survey of Health, Ageing and Retirement in Europe (SHARE) Wave 5. Release version: 1.0.0. SHARE-ERIC. Data set. DOI: 10.6103/SHARE.w5.100                                                                      | X | 52  | X | 52  |   | All ages | Both |
| Netherlands | 2014             | CentERdata. Netherlands Dutch National Bank Household Survey 2014.                                                                                                                                                                      | X | 26  |   |     |   | 0-95     | Both |
| New Zealand | 2000             | University of Otago (New Zealand), World Health Organization (WHO). New Zealand WHO Multi-country Survey Study on Health and Health System Responsiveness 2000-2001. Geneva, Switzerland: World Health Organization (WHO).              | X | 4.3 | X | 4.3 |   | All ages | Both |
| New Zealand | 2000             | Ministry of Health (New Zealand). New Zealand National Minimum Dataset 2000.                                                                                                                                                            |   |     | X |     | X | 0-99     | Both |
| New Zealand | 2001             | Ministry of Health (New Zealand). New Zealand National Minimum Dataset 2001.                                                                                                                                                            |   |     | X |     | X | 0-99     | Both |
| New Zealand | 2002             | Ministry of Health (New Zealand). New Zealand National Minimum Dataset 2002.                                                                                                                                                            |   |     | X |     | X | 0-99     | Both |
| New Zealand | 2003             | Ministry of Health (New Zealand). New Zealand National Minimum Dataset 2003.                                                                                                                                                            |   |     | X |     | X | 0-99     | Both |
| New Zealand | 2004, 2008, 2013 | Organization for Economic Co-operation and Development (OECD). OECD Health Statistics. Paris, France: Organization for Economic Co-operation and Development (OECD).                                                                    | X |     |   |     | X | All ages | Both |
| New Zealand | 2004             | Ministry of Health (New Zealand). New Zealand National Minimum Dataset 2004.                                                                                                                                                            |   |     | X |     | X | 0-99     | Both |
| New Zealand | 2005             | Ministry of Health (New Zealand). New Zealand National Minimum Dataset 2005.                                                                                                                                                            |   |     | X |     | X | 0-99     | Both |
| New Zealand | 2006             | Ministry of Health (New Zealand). New Zealand National Minimum Dataset 2006.                                                                                                                                                            |   |     | X |     | X | 0-99     | Both |
| New Zealand | 2007             | Ministry of Health (New Zealand). New Zealand National Minimum Dataset 2007.                                                                                                                                                            |   |     | X |     | X | 0-99     | Both |
| New Zealand | 2008             | Ministry of Health (New Zealand). New Zealand National Minimum Dataset 2008.                                                                                                                                                            |   |     | X |     | X | 0-99     | Both |
| New Zealand | 2009             | Ministry of Health (New Zealand). New Zealand National Minimum Dataset 2009.                                                                                                                                                            |   |     | X |     | X | 0-99     | Both |
| New Zealand | 2010             | Ministry of Health (New Zealand). New Zealand National Minimum Dataset 2010.                                                                                                                                                            |   |     | X |     | X | 0-99     | Both |
| New Zealand | 2011             | Ministry of Health (New Zealand). New Zealand National Minimum Dataset 2011.                                                                                                                                                            |   |     | X |     | X | 0-99     | Both |
| New Zealand | 2012             | Ministry of Health (New Zealand). New Zealand National Minimum Dataset 2012.                                                                                                                                                            |   |     | X |     | X | 0-99     | Both |
| New Zealand | 2013             | Ministry of Health (New Zealand). New Zealand National Minimum Dataset 2013.                                                                                                                                                            |   |     | X |     | X | 0-99     | Both |
| New Zealand | 2014             | Ministry of Health (New Zealand). New Zealand National Minimum Dataset 2014.                                                                                                                                                            |   |     | X |     | X | 0-99     | Both |
| New Zealand | 2015             | Ministry of Health (New Zealand). New Zealand National Minimum Dataset 2015.                                                                                                                                                            |   |     | X |     | X | 0-99     | Both |
| Nicaragua   | 1993             | National Institute of Statistics and Censuses (Nicaragua), World Bank. Nicaragua Living Standards Measurement Survey 1993.                                                                                                              | X | 4.3 | X | 4.3 |   | All ages | Both |
| Nicaragua   | 1998             | National Institute of Statistics and Censuses (Nicaragua), World Bank. Nicaragua Living Standards Measurement Survey 1998-1999.                                                                                                         | X | 4   | X | 4   |   | All ages | Both |
| Nicaragua   | 2001             | National Institute of Statistics and Censuses (Nicaragua), World Bank. Nicaragua Living Standards Measurement Survey 2001.                                                                                                              | X | 4   |   |     |   | All ages | Both |
| Nicaragua   | 2011             | Ministry of Health (Nicaragua), National Institute for Development Information (Nicaragua). Nicaragua National Demographic and Health Survey 2011-2012. Managua, Nicaragua: National Institute for Development Information (Nicaragua). | X | 4.3 | X | 4.3 |   | All ages | Both |
| Niger       | 2011             | National Institute of Statistics (Niger), World Bank. Niger Living Standards Measurement Study - Integrated Survey on Agriculture 2011-2012.                                                                                            | X | 4   | X | 52  |   | 0-70     | Both |
| Nigeria     | 2000             | University of Ibadan (Nigeria), World Health Organization (WHO). Nigeria WHO Multi-country Survey Study on Health and Health System Responsiveness 2000-2001.                                                                           | X | 4.3 | X | 4.3 |   | All ages | Both |
| Nigeria     | 2003             | Federal Office of Statistics (Nigeria). Nigeria Living Standards Survey 2003-2004.                                                                                                                                                      | X | 2   |   |     |   | All ages | Both |
| Nigeria     | 2007             | Central Bank of Nigeria, National Bureau of Statistics (Nigeria), Nigerian Communications Commission (NCC). Nigeria General Household Survey 2007. Abuja, Nigeria: National Bureau of Statistics (Nigeria).                             | X | 4   |   |     |   | All ages | Both |
| Nigeria     | 2008             | National Bureau of Statistics (Nigeria). Nigeria Living Standards Survey 2008-2010. Abuja, Nigeria: National Bureau of Statistics (Nigeria).                                                                                            | X | 2   | X | 4   |   | All ages | Both |

|                  |                                                      |                                                                                                                                                                                                                                       |  |  |   |    |   |          |      |
|------------------|------------------------------------------------------|---------------------------------------------------------------------------------------------------------------------------------------------------------------------------------------------------------------------------------------|--|--|---|----|---|----------|------|
| Northern Ireland | 1999, 2001, 2002, 2003, 2004, 2006, 2007, 2009, 2010 | World Health Organization Regional Office for Europe (WHO/Europe). European Hospital Morbidity Database 1999-2007. Copenhagen, Denmark: World Health Organization Regional Office for Europe (WHO/Europe).                            |  |  | X |    | X | All ages | Both |
| Northern Ireland | 2006                                                 | Department of Health, Social Services and Public Safety (Northern Ireland), Information Centre for Health and Social Care, NHS, NHS England, NHS Health Scotland, NHS Wales. United Kingdom Hospital Patient and Discharge Data 2006. |  |  | X |    | X | All ages | Both |
| Northern Ireland | 2012                                                 | Department of Health, Social Services and Public Safety (Northern Ireland), Information Centre for Health and Social Care, NHS, NHS England, NHS Health Scotland, NHS Wales. United Kingdom Hospital Patient and Discharge Data 2012. |  |  | X |    | X | All ages | Both |
| Northern Ireland | 2013                                                 | Trinity College Dublin. Ireland Longitudinal Study on Ageing 2009-2011. Dublin, Ireland: Irish Social Science Data Archive, University College Dublin.                                                                                |  |  | X | 52 |   | 0-85     | Both |
| Northern Ireland | 2013                                                 | Department of Health, Social Services and Public Safety (Northern Ireland), Information Centre for Health and Social Care, NHS, NHS England, NHS Health Scotland, NHS Wales. United Kingdom Hospital Patient and Discharge Data 2013. |  |  | X |    | X | All ages | Both |
| Northern Ireland | 2014                                                 | Department of Health, Social Services and Public Safety (Northern Ireland), Information Centre for Health and Social Care, NHS, NHS England, NHS Health Scotland, NHS Wales. United Kingdom Hospital Patient and Discharge Data 2014. |  |  | X |    | X | All ages | Both |
| Norway           | 1973                                                 | Norwegian Directorate of Health. Norway Patient Register 1973.                                                                                                                                                                        |  |  | X |    | X | All ages | Both |
| Norway           | 1975                                                 | Norwegian Directorate of Health. Norway Patient Register 1975.                                                                                                                                                                        |  |  | X |    | X | All ages | Both |
| Norway           | 1977                                                 | Norwegian Directorate of Health. Norway Patient Register 1977.                                                                                                                                                                        |  |  | X |    | X | All ages | Both |
| Norway           | 1978                                                 | Norwegian Directorate of Health. Norway Patient Register 1978.                                                                                                                                                                        |  |  | X |    | X | All ages | Both |
| Norway           | 1979                                                 | Norwegian Directorate of Health. Norway Patient Register 1979.                                                                                                                                                                        |  |  | X |    | X | All ages | Both |
| Norway           | 1980                                                 | Norwegian Directorate of Health. Norway Patient Register 1980.                                                                                                                                                                        |  |  | X |    | X | All ages | Both |
| Norway           | 1981                                                 | Norwegian Directorate of Health. Norway Patient Register 1981.                                                                                                                                                                        |  |  | X |    | X | All ages | Both |
| Norway           | 1982                                                 | Norwegian Directorate of Health. Norway Patient Register 1982.                                                                                                                                                                        |  |  | X |    | X | All ages | Both |
| Norway           | 1983                                                 | Norwegian Directorate of Health. Norway Patient Register 1983.                                                                                                                                                                        |  |  | X |    | X | All ages | Both |
| Norway           | 1984                                                 | Norwegian Directorate of Health. Norway Patient Register 1984.                                                                                                                                                                        |  |  | X |    | X | All ages | Both |
| Norway           | 1985                                                 | Norwegian Directorate of Health. Norway Patient Register 1985.                                                                                                                                                                        |  |  | X |    | X | All ages | Both |
| Norway           | 1986                                                 | Norwegian Directorate of Health. Norway Patient Register 1986.                                                                                                                                                                        |  |  | X |    | X | All ages | Both |
| Norway           | 1987                                                 | Norwegian Directorate of Health. Norway Patient Register 1987.                                                                                                                                                                        |  |  | X |    | X | All ages | Both |
| Norway           | 1988                                                 | Norwegian Directorate of Health. Norway Patient Register 1988.                                                                                                                                                                        |  |  | X |    | X | All ages | Both |
| Norway           | 1989                                                 | Norwegian Directorate of Health. Norway Patient Register 1989.                                                                                                                                                                        |  |  | X |    | X | All ages | Both |
| Norway           | 1990                                                 | Norwegian Directorate of Health. Norway Patient Register 1990.                                                                                                                                                                        |  |  | X |    | X | All ages | Both |
| Norway           | 1991                                                 | Norwegian Directorate of Health. Norway Patient Register 1991.                                                                                                                                                                        |  |  | X |    | X | All ages | Both |
| Norway           | 1992                                                 | Norwegian Directorate of Health. Norway Patient Register 1992.                                                                                                                                                                        |  |  | X |    | X | All ages | Both |
| Norway           | 1993                                                 | Norwegian Directorate of Health. Norway Patient Register 1993.                                                                                                                                                                        |  |  | X |    | X | All ages | Both |
| Norway           | 1994                                                 | Norwegian Directorate of Health. Norway Patient Register 1994.                                                                                                                                                                        |  |  | X |    | X | All ages | Both |
| Norway           | 1995                                                 | Norwegian Directorate of Health. Norway Patient Register 1995.                                                                                                                                                                        |  |  | X |    | X | All ages | Both |
| Norway           | 1996                                                 | Norwegian Directorate of Health. Norway Patient Register 1996.                                                                                                                                                                        |  |  | X |    | X | All ages | Both |
| Norway           | 1997                                                 | Norwegian Directorate of Health. Norway Patient Register 1997.                                                                                                                                                                        |  |  | X |    | X | All ages | Both |
| Norway           | 1998                                                 | Norwegian Directorate of Health. Norway Patient Register 1998.                                                                                                                                                                        |  |  | X |    | X | All ages | Both |
| Norway           | 1999                                                 | Norwegian Directorate of Health. Norway Patient Register 1999.                                                                                                                                                                        |  |  | X |    | X | All ages | Both |
| Norway           | 2000                                                 | Norwegian Directorate of Health. Norway Patient Register 2000.                                                                                                                                                                        |  |  | X |    | X | All ages | Both |
| Norway           | 2001                                                 | Norwegian Directorate of Health. Norway Patient Register 2001.                                                                                                                                                                        |  |  | X |    | X | All ages | Both |
| Norway           | 2002                                                 | Norwegian Directorate of Health. Norway Patient Register 2002.                                                                                                                                                                        |  |  | X |    | X | All ages | Both |
| Norway           | 2003, 2004, 2005, 2006, 2007                         | World Health Organization Regional Office for Europe (WHO/Europe). European Hospital Morbidity Database 1999-2007. Copenhagen, Denmark: World Health Organization Regional Office for Europe (WHO/Europe).                            |  |  | X |    | X | All ages | Both |

|                  |                                                      |                                                                                                                                                                                                 |   |      |   |     |   |          |        |
|------------------|------------------------------------------------------|-------------------------------------------------------------------------------------------------------------------------------------------------------------------------------------------------|---|------|---|-----|---|----------|--------|
| Norway           | 2003                                                 | World Health Organization (WHO). Norway World Health Survey 2003. Geneva, Switzerland: World Health Organization (WHO), 2005.                                                                   |   |      | X | 52  |   | 15-95    | Both   |
| Norway           | 2003                                                 | Norwegian Directorate of Health. Norway Patient Register 2003.                                                                                                                                  |   |      | X |     | X | All ages | Both   |
| Norway           | 2007, 2008, 2009, 2010, 2011, 2012, 2013, 2014, 2015 | Organization for Economic Co-operation and Development (OECD). OECD Health Statistics. Paris, France: Organization for Economic Co-operation and Development (OECD).                            | X |      |   |     | X | All ages | Both   |
| Norway           | 2009                                                 | Norwegian Directorate of Health. Norway Patient Register 2009.                                                                                                                                  |   |      | X |     | X | All ages | Both   |
| Norway           | 2010                                                 | Norwegian Directorate of Health. Norway Patient Register 2010.                                                                                                                                  |   |      | X |     | X | All ages | Both   |
| Norway           | 2011                                                 | ISSP Research Group (2009): International Social Survey Programme: Health and Health Care - ISSP 2011. GESIS Data Archive, Cologne. ZA5800 Data file version 3.0.0, doi:10.4232/1.12252.        | X | 52   |   |     |   | 15-80    | Both   |
| Norway           | 2011                                                 | Norwegian Directorate of Health. Norway Patient Register 2011.                                                                                                                                  |   |      | X |     | X | All ages | Both   |
| Norway           | 2012                                                 | Norwegian Directorate of Health. Norway Patient Register 2012.                                                                                                                                  |   |      | X |     | X | All ages | Both   |
| Norway           | 2013                                                 | Norwegian Directorate of Health. Norway Patient Register 2013.                                                                                                                                  |   |      | X |     | X | All ages | Both   |
| Norway           | 2014                                                 | Norwegian Directorate of Health. Norway Patient Register 2014.                                                                                                                                  |   |      | X |     | X | All ages | Both   |
| Oman             | 1995                                                 | Health Ministers' Council for GCC States, Ministry of Health (Oman). Oman Family Health Survey 1995.                                                                                            | X | 2    |   |     |   | All ages | Both   |
| Oman             | 2000                                                 | Gallup Europe, World Health Organization (WHO). Oman WHO Multi-country Survey Study on Health and Health System Responsiveness 2000-2001. Geneva, Switzerland: World Health Organization (WHO). | X | 4.3  | X | 4.3 |   | 15-75    | Both   |
| Pakistan         | 1991                                                 | Federal Bureau of Statistics (Pakistan) and World Bank. Pakistan Living Standards Measurement Survey 1991. Islamabad, Pakistan: Federal Bureau of Statistics (Pakistan).                        | X | 4.3  |   |     |   | All ages | Both   |
| Pakistan         | 2003                                                 | World Health Organization (WHO). Pakistan World Health Survey 2003-2004. Geneva, Switzerland: World Health Organization (WHO), 2005.                                                            |   |      | X | 52  |   | All ages | Both   |
| Pakistan         | 2008                                                 | Pakistan Bureau of Statistics. Pakistan Social and Living Standards Measurement Survey 2008-2009.                                                                                               | X | 2    |   |     |   | All ages | Both   |
| Palestine        | 2004                                                 | Palestinian Central Bureau of Statistics. Palestine Demographic and Health Survey 2004.                                                                                                         | X | 2    | X | 2   |   | 15-55    | Female |
| Panama           | 1997                                                 | Ministry of Planning and Economic Policy (Panama), World Bank. Panama Living Standards Measurement Survey 1997. Washington DC, United States: World Bank.                                       | X | 4.3  |   |     |   | All ages | Both   |
| Panama           | 2003                                                 | Census and Statistics Directorate (Panama), Ministry of Economy and Finance (Panama), World Bank. Panama Living Standard Measurement Survey 2003. Washington DC, United States: World Bank.     | X | 4.3  | X | 4.3 |   | 5-100+   | Both   |
| Panama           | 2008                                                 | Census and Statistics Directorate (Panama), Ministry of Economy and Finance (Panama), World Bank. Panama Living Standard Measurement Survey 2008. Washington DC, United States: World Bank.     | X | 4.3  |   |     |   | 5-100+   | Both   |
| Papua New Guinea | 1996                                                 | Papua New Guinea Institute of National Affairs, Unisearch PNG, World Bank. Papua New Guinea Living Standards Measurement Survey 1996. Washington DC, United States: World Bank.                 | X | 4.3  |   |     |   | 0-90     | Both   |
| Paraguay         | 1997                                                 | Department of Statistics, Surveys and Censuses (Paraguay). Paraguay Integrated Household Survey 1997-1998. Asunción, Paraguay: Department of Statistics, Surveys and Censuses (Paraguay).       | X | 12.9 |   |     |   | All ages | Both   |
| Paraguay         | 2000                                                 | Department of Statistics, Surveys and Censuses (Paraguay). Paraguay Integrated Household Survey 2000-2001. Asunción, Paraguay: Department of Statistics, Surveys and Censuses (Paraguay).       | X | 12.9 |   |     |   | All ages | Both   |
| Paraguay         | 2002                                                 | World Health Organization (WHO). Paraguay World Health Survey 2002-2003. Geneva, Switzerland: World Health Organization (WHO), 2005.                                                            |   |      | X | 52  |   | All ages | Both   |
| Paraguay         | 2003                                                 | Department of Statistics, Surveys and Censuses (Paraguay). Paraguay Permanent Household Survey 2003. Asunción, Paraguay: Department of Statistics, Surveys and Censuses (Paraguay).             | X | 12.9 |   |     |   | All ages | Both   |
| Paraguay         | 2004                                                 | Department of Statistics, Surveys and Censuses (Paraguay). Paraguay Permanent Household Survey 2004. Asunción, Paraguay: Department of Statistics, Surveys and Censuses (Paraguay).             | X | 12.9 |   |     |   | All ages | Both   |
| Paraguay         | 2005                                                 | Department of Statistics, Surveys and Censuses (Paraguay). Paraguay Permanent Household Survey 2005. Asunción, Paraguay: Department of Statistics, Surveys and Censuses (Paraguay).             | X | 12.9 |   |     |   | All ages | Both   |
| Paraguay         | 2006                                                 | Department of Statistics, Surveys and Censuses (Paraguay). Paraguay Permanent Household Survey 2006. Asunción, Paraguay: Department of Statistics, Surveys and Censuses (Paraguay).             | X | 12.9 |   |     |   | All ages | Both   |
| Paraguay         | 2007                                                 | Department of Statistics, Surveys and Censuses (Paraguay). Paraguay Permanent Household Survey 2007. Asunción, Paraguay: Department of Statistics, Surveys and Censuses (Paraguay).             | X | 12.9 |   |     |   | All ages | Both   |

|             |      |                                                                                                                                                                                                                                                                                                                  |   |      |   |      |   |          |      |
|-------------|------|------------------------------------------------------------------------------------------------------------------------------------------------------------------------------------------------------------------------------------------------------------------------------------------------------------------|---|------|---|------|---|----------|------|
| Paraguay    | 2008 | Department of Statistics, Surveys and Censuses (Paraguay). Paraguay Permanent Household Survey 2008. Asunción, Paraguay: Department of Statistics, Surveys and Censuses (Paraguay).                                                                                                                              | X | 12.9 |   |      |   | All ages | Both |
| Paraguay    | 2009 | Department of Statistics, Surveys and Censuses (Paraguay). Paraguay Permanent Household Survey 2009. Asunción, Paraguay: Department of Statistics, Surveys and Censuses (Paraguay)                                                                                                                               | X | 12.9 |   |      |   | All ages | Both |
| Peru        | 1990 | National Institute of Statistics and Informatics (Peru), World Bank (WB). Peru Living Standards Measurement Survey 1990.                                                                                                                                                                                         | X | 4    | X | 4    |   | 0-95     | Both |
| Peru        | 1991 | National Institute of Statistics and Informatics (INEI) (Peru), World Bank. Peru Living Standards Measurement Survey 1991. Washington DC, United States: World Bank.                                                                                                                                             | X | 4.3  | X | 4.3  |   | All ages | Both |
| Peru        | 1994 | National Institute of Statistics and Informatics (Peru), World Bank (WB). Peru Living Standards Measurement Survey 1994.                                                                                                                                                                                         | X | 4    | X | 4    |   | All ages | Both |
| Peru        | 1998 | National Institute of Statistics and Informatics (INEI) (Peru). Peru National Household Survey, Second Quarter 1998. Lima, Peru: National Institute of Statistics and Informatics (INEI) (Peru).                                                                                                                 | X | 12.9 | X | 12.9 |   | All ages | Both |
| Peru        | 1999 | National Institute of Statistics and Informatics (INEI) (Peru). Peru National Household Survey, Second Quarter 1999. Lima, Peru: National Institute of Statistics and Informatics (INEI) (Peru).                                                                                                                 | X | 12.9 | X | 12.9 |   | All ages | Both |
| Peru        | 2000 | Instituto Cuánto. Peru National Living Standards Measurement Survey 2000. Lima, Peru: Instituto Cuánto.                                                                                                                                                                                                          | X | 4    |   |      |   | All ages | Both |
| Peru        | 2000 | National Institute of Statistics and Informatics (INEI) (Peru). Peru National Household Survey, Second Quarter 2000. Lima, Peru: National Institute of Statistics and Informatics (INEI) (Peru).                                                                                                                 | X | 12.9 | X | 12.9 |   | All ages | Both |
| Peru        | 2005 | National Institute of Statistics and Informatics (INEI) (Peru). Peru National Household Survey 2005. Lima, Peru: National Institute of Statistics and Informatics (INEI) (Peru).                                                                                                                                 | X | 4    | X | 52   |   | All ages | Both |
| Peru        | 2006 | National Institute of Statistics and Informatics (INEI) (Peru). Peru National Household Survey 2006. Lima, Peru: National Institute of Statistics and Informatics (INEI) (Peru).                                                                                                                                 | X | 4    | X | 52   |   | All ages | Both |
| Peru        | 2007 | National Institute of Statistics and Informatics (INEI) (Peru), United Nations Economic Commission for Latin America and the Caribbean (CEPAL), Institute of Research for Development (France). Peru National Household Survey 2007. Lima, Peru: National Institute of Statistics and Informatics (INEI) (Peru). | X | 4    | X | 52   |   | All ages | Both |
| Peru        | 2008 | National Institute of Statistics and Informatics (INEI) (Peru), United Nations Economic Commission for Latin America and the Caribbean (CEPAL), Institute of Research for Development (France). Peru National Household Survey 2008. Lima, Peru: National Institute of Statistics and Informatics (INEI) (Peru). | X | 4    | X | 52   |   | All ages | Both |
| Peru        | 2009 | National Institute of Statistics and Informatics (INEI) (Peru). Peru National Household Survey 2009. Lima, Peru: National Institute of Statistics and Informatics (INEI) (Peru).                                                                                                                                 | X | 4    | X | 52   |   | All ages | Both |
| Peru        | 2010 | National Institute of Statistics and Informatics (INEI) (Peru). Peru National Household Survey 2010. Lima, Peru: National Institute of Statistics and Informatics (INEI) (Peru).                                                                                                                                 | X | 4    | X | 52   |   | All ages | Both |
| Philippines | 2003 | World Health Organization (WHO), Philippines World Health Survey 2003. Geneva, Switzerland: World Health Organization (WHO), 2005.                                                                                                                                                                               |   |      | X | 52   |   | All ages | Both |
| Philippines | 2011 | ISSP Research Group (2009): International Social Survey Programme: Health and Health Care - ISSP 2011. GESIS Data Archive, Cologne. ZA5800 Data file version 3.0.0, doi:10.4232/1.12252.                                                                                                                         | X | 52   |   |      |   | 15-90    | Both |
| Poland      | 1980 | Ministry of Health (Poland). Poland Hospital Inpatient Discharges 1980.                                                                                                                                                                                                                                          |   |      | X |      | X | All ages | Both |
| Poland      | 1981 | Ministry of Health (Poland). Poland Hospital Inpatient Discharges 1981.                                                                                                                                                                                                                                          |   |      | X |      | X | All ages | Both |
| Poland      | 1982 | Ministry of Health (Poland). Poland Hospital Inpatient Discharges 1982.                                                                                                                                                                                                                                          |   |      | X |      | X | All ages | Both |
| Poland      | 1983 | Ministry of Health (Poland). Poland Hospital Inpatient Discharges 1983.                                                                                                                                                                                                                                          |   |      | X |      | X | All ages | Both |
| Poland      | 1984 | Ministry of Health (Poland). Poland Hospital Inpatient Discharges 1984.                                                                                                                                                                                                                                          |   |      | X |      | X | All ages | Both |
| Poland      | 1985 | Ministry of Health (Poland). Poland Hospital Inpatient Discharges 1985.                                                                                                                                                                                                                                          |   |      | X |      | X | All ages | Both |
| Poland      | 1986 | Ministry of Health (Poland). Poland Hospital Inpatient Discharges 1986.                                                                                                                                                                                                                                          |   |      | X |      | X | All ages | Both |
| Poland      | 1987 | Ministry of Health (Poland). Poland Hospital Inpatient Discharges 1987.                                                                                                                                                                                                                                          |   |      | X |      | X | All ages | Both |
| Poland      | 1988 | Ministry of Health (Poland). Poland Hospital Inpatient Discharges 1988.                                                                                                                                                                                                                                          |   |      | X |      | X | All ages | Both |
| Poland      | 1989 | Ministry of Health (Poland). Poland Hospital Inpatient Discharges 1989.                                                                                                                                                                                                                                          |   |      | X |      | X | All ages | Both |
| Poland      | 1990 | Ministry of Health (Poland). Poland Hospital Inpatient Discharges 1990.                                                                                                                                                                                                                                          |   |      | X |      | X | All ages | Both |
| Poland      | 1991 | Ministry of Health (Poland). Poland Hospital Inpatient Discharges 1991.                                                                                                                                                                                                                                          |   |      | X |      | X | All ages | Both |
| Poland      | 1992 | Ministry of Health (Poland). Poland Hospital Inpatient Discharges 1992.                                                                                                                                                                                                                                          |   |      | X |      | X | All ages | Both |
| Poland      | 1993 | Ministry of Health (Poland). Poland Hospital Inpatient Discharges 1993.                                                                                                                                                                                                                                          |   |      | X |      | X | All ages | Both |
| Poland      | 1994 | Ministry of Health (Poland). Poland Hospital Inpatient Discharges 1994.                                                                                                                                                                                                                                          |   |      | X |      | X | All ages | Both |
| Poland      | 1995 | Ministry of Health (Poland). Poland Hospital Inpatient Discharges 1995.                                                                                                                                                                                                                                          |   |      | X |      | X | All ages | Both |

|          |                                                                                          |                                                                                                                                                                                                                                    |   |     |   |     |   |          |      |
|----------|------------------------------------------------------------------------------------------|------------------------------------------------------------------------------------------------------------------------------------------------------------------------------------------------------------------------------------|---|-----|---|-----|---|----------|------|
| Poland   | 1996                                                                                     | Ministry of Health (Poland). Poland Hospital Inpatient Discharges 1996.                                                                                                                                                            |   |     | X |     | X | All ages | Both |
| Poland   | 1997                                                                                     | Ministry of Health (Poland). Poland Hospital Inpatient Discharges 1997.                                                                                                                                                            |   |     | X |     | X | All ages | Both |
| Poland   | 1998                                                                                     | Ministry of Health (Poland). Poland Hospital Inpatient Discharges 1998.                                                                                                                                                            |   |     | X |     | X | All ages | Both |
| Poland   | 1998                                                                                     | Ministry of Justice (Poland). Poland Outpatient Contacts Per Person Per Year 1998.                                                                                                                                                 | X |     |   |     | X | All ages | Both |
| Poland   | 1999                                                                                     | Ministry of Health (Poland). Poland Hospital Inpatient Discharges 1999.                                                                                                                                                            |   |     | X |     | X | All ages | Both |
| Poland   | 1999                                                                                     | Ministry of Justice (Poland). Poland Outpatient Contacts Per Person Per Year 1999.                                                                                                                                                 | X |     |   |     | X | All ages | Both |
| Poland   | 2000                                                                                     | Public Opinion Research Center (CBOS) (Poland), World Health Organization (WHO). Poland WHO Multi-country Survey Study on Health and Health System Responsiveness 2000-2001. Geneva, Switzerland: World Health Organization (WHO). | X | 4.3 | X | 4.3 |   | 0-95     | Both |
| Poland   | 2000                                                                                     | Ministry of Health (Poland). Poland Hospital Inpatient Discharges 2000.                                                                                                                                                            |   |     | X |     | X | All ages | Both |
| Poland   | 2001, 2002, 2003, 2004, 2005, 2006, 2007, 2008, 2009, 2010, 2011, 2012, 2013, 2014, 2015 | Organization for Economic Co-operation and Development (OECD). OECD Health Statistics. Paris, France: Organization for Economic Co-operation and Development (OECD).                                                               | X |     |   |     | X | All ages | Both |
| Poland   | 2001                                                                                     | Ministry of Health (Poland). Poland Hospital Inpatient Discharges 2001.                                                                                                                                                            |   |     | X |     | X | All ages | Both |
| Poland   | 2002                                                                                     | Ministry of Health (Poland). Poland Hospital Inpatient Discharges 2002.                                                                                                                                                            |   |     | X |     | X | All ages | Both |
| Poland   | 2004, 2005, 2006, 2007, 2009, 2010, 2011                                                 | World Health Organization Regional Office for Europe (WHO/Europe). European Hospital Morbidity Database 1999-2007. Copenhagen, Denmark: World Health Organization Regional Office for Europe (WHO/Europe).                         |   |     | X |     | X | All ages | Both |
| Poland   | 2004                                                                                     |                                                                                                                                                                                                                                    |   |     | X |     | X | All ages | Both |
| Poland   | 2005                                                                                     |                                                                                                                                                                                                                                    |   |     | X |     | X | All ages | Both |
| Poland   | 2010                                                                                     | Börsch-Supan, A. (2013). Survey of Health, Ageing and Retirement in Europe (SHARE) Wave 2. Release version: 2.6.0. SHARE-ERIC. Data set. DOI: 10.6103/SHARE.w2.260                                                                 | X | 52  | X | 52  |   | 35-100+  | Both |
| Poland   | 2012                                                                                     | Börsch-Supan, A. (2013). Survey of Health, Ageing and Retirement in Europe (SHARE) Wave 4. Release version: 1.1.1. SHARE-ERIC. Data set. DOI: 10.6103/SHARE.w4.111                                                                 | X | 52  | X | 52  |   | 35-100+  | Both |
| Poland   | 2013                                                                                     | ISSP Research Group (2009): International Social Survey Programme: Health and Health Care - ISSP 2011. GESIS Data Archive, Cologne. ZA5800 Data file version 3.0.0, doi:10.4232/1.12252.                                           | X | 52  |   |     |   | 15-90    | Both |
| Poland   | 2013                                                                                     | Ministry of Health (Poland). Poland Hospital Inpatient Discharges 2013.                                                                                                                                                            |   |     | X |     | X | All ages | Both |
| Poland   | 2014                                                                                     | Ministry of Health (Poland). Poland Hospital Inpatient Discharges 2014.                                                                                                                                                            |   |     | X |     | X | All ages | Both |
| Portugal | 1985                                                                                     | Statistics Portugal. Portugal Hospital Inpatient Discharges 1985.                                                                                                                                                                  |   |     | X |     | X | All ages | Both |
| Portugal | 1986                                                                                     | Statistics Portugal. Portugal Hospital Inpatient Discharges 1986.                                                                                                                                                                  |   |     | X |     | X | All ages | Both |
| Portugal | 1987                                                                                     | Statistics Portugal. Portugal Hospital Inpatient Discharges 1987.                                                                                                                                                                  |   |     | X |     | X | All ages | Both |
| Portugal | 1988                                                                                     | Statistics Portugal. Portugal Hospital Inpatient Discharges 1988.                                                                                                                                                                  |   |     | X |     | X | All ages | Both |
| Portugal | 1989                                                                                     | Statistics Portugal. Portugal Hospital Inpatient Discharges 1989.                                                                                                                                                                  |   |     | X |     | X | All ages | Both |
| Portugal | 1990                                                                                     | Statistics Portugal. Portugal Hospital Inpatient Discharges 1990.                                                                                                                                                                  |   |     | X |     | X | All ages | Both |
| Portugal | 1991                                                                                     | Statistics Portugal. Portugal Hospital Inpatient Discharges 1991.                                                                                                                                                                  |   |     | X |     | X | All ages | Both |
| Portugal | 1992                                                                                     | Statistics Portugal. Portugal Hospital Inpatient Discharges 1992.                                                                                                                                                                  |   |     | X |     | X | All ages | Both |
| Portugal | 1993                                                                                     | Statistics Portugal. Portugal Hospital Inpatient Discharges 1993.                                                                                                                                                                  |   |     | X |     | X | All ages | Both |
| Portugal | 1994                                                                                     | Statistics Portugal. Portugal Hospital Inpatient Discharges 1994.                                                                                                                                                                  |   |     | X |     | X | All ages | Both |
| Portugal | 1995                                                                                     | Statistics Portugal. Portugal Hospital Inpatient Discharges 1995.                                                                                                                                                                  |   |     | X |     | X | All ages | Both |
| Portugal | 1996                                                                                     | Statistics Portugal. Portugal Hospital Inpatient Discharges 1996.                                                                                                                                                                  |   |     | X |     | X | All ages | Both |
| Portugal | 1997                                                                                     | Statistics Portugal. Portugal Hospital Inpatient Discharges 1997.                                                                                                                                                                  |   |     | X |     | X | All ages | Both |
| Portugal | 1998                                                                                     | Statistics Portugal. Portugal Hospital Inpatient Discharges 1998.                                                                                                                                                                  |   |     | X |     | X | All ages | Both |



|             |                                                                              |                                                                                                                                                                                                                                                                                                                                                                                                                         |   |     |   |     |   |          |      |
|-------------|------------------------------------------------------------------------------|-------------------------------------------------------------------------------------------------------------------------------------------------------------------------------------------------------------------------------------------------------------------------------------------------------------------------------------------------------------------------------------------------------------------------|---|-----|---|-----|---|----------|------|
| Portugal    | 1998                                                                         | Statistics Portugal. Portugal Outpatient Contacts Per Person Per Year 1998.                                                                                                                                                                                                                                                                                                                                             | X |     |   |     | X | All ages | Both |
| Portugal    | 1999                                                                         | Statistics Portugal. Portugal Hospital Inpatient Discharges 1999.                                                                                                                                                                                                                                                                                                                                                       |   |     |   | X   | X | All ages | Both |
| Portugal    | 1999                                                                         | Statistics Portugal. Portugal Outpatient Contacts Per Person Per Year 1999.                                                                                                                                                                                                                                                                                                                                             | X |     |   |     | X | All ages | Both |
| Portugal    | 2000                                                                         | International Research Associates (INRA) Europe, World Health Organization (WHO). Portugal WHO Multi-country Survey Study on Health and Health System Responsiveness 2000-2001. Geneva, Switzerland: World Health Organization (WHO).                                                                                                                                                                                   | X | 4.3 | X | 4.3 |   | 15-90    | Both |
| Portugal    | 2000                                                                         | Statistics Portugal. Portugal Hospital Inpatient Discharges 2000.                                                                                                                                                                                                                                                                                                                                                       |   |     | X |     | X | All ages | Both |
| Portugal    | 2001, 2002, 2003, 2004, 2005, 2006, 2007, 2008, 2009, 2010, 2011, 2012, 2013 | Organization for Economic Co-operation and Development (OECD). OECD Health Statistics. Paris, France: Organization for Economic Co-operation and Development (OECD).                                                                                                                                                                                                                                                    | X |     |   |     | X | All ages | Both |
| Portugal    | 2001                                                                         | Statistics Portugal. Portugal Hospital Inpatient Discharges 2001.                                                                                                                                                                                                                                                                                                                                                       |   |     | X |     | X | All ages | Both |
| Portugal    | 2002                                                                         | Statistics Portugal. Portugal Hospital Inpatient Discharges 2002.                                                                                                                                                                                                                                                                                                                                                       |   |     | X |     | X | All ages | Both |
| Portugal    | 2003                                                                         | World Health Organization (WHO). Portugal World Health Survey 2003. Geneva, Switzerland: World Health Organization (WHO), 2006.                                                                                                                                                                                                                                                                                         |   |     | X | 52  |   | 15-95    | Both |
| Portugal    | 2003                                                                         | Statistics Portugal. Portugal Hospital Inpatient Discharges 2003.                                                                                                                                                                                                                                                                                                                                                       |   |     | X |     | X | All ages | Both |
| Portugal    | 2004                                                                         | Statistics Portugal. Portugal Hospital Inpatient Discharges 2004.                                                                                                                                                                                                                                                                                                                                                       |   |     | X |     | X | All ages | Both |
| Portugal    | 2005                                                                         | Statistics Portugal. Portugal Hospital Inpatient Discharges 2005.                                                                                                                                                                                                                                                                                                                                                       |   |     | X |     | X | All ages | Both |
| Portugal    | 2006                                                                         | Statistics Portugal. Portugal Hospital Inpatient Discharges 2006.                                                                                                                                                                                                                                                                                                                                                       |   |     | X |     | X | All ages | Both |
| Portugal    | 2007                                                                         | Statistics Portugal. Portugal Hospital Inpatient Discharges 2007.                                                                                                                                                                                                                                                                                                                                                       |   |     | X |     | X | All ages | Both |
| Portugal    | 2008                                                                         | Statistics Portugal. Portugal Hospital Inpatient Discharges 2008.                                                                                                                                                                                                                                                                                                                                                       |   |     | X |     | X | All ages | Both |
| Portugal    | 2009                                                                         | Statistics Portugal. Portugal Hospital Inpatient Discharges 2009.                                                                                                                                                                                                                                                                                                                                                       |   |     | X |     | X | All ages | Both |
| Portugal    | 2010                                                                         | Statistics Portugal. Portugal Hospital Inpatient Discharges 2010.                                                                                                                                                                                                                                                                                                                                                       |   |     | X |     | X | All ages | Both |
| Portugal    | 2011                                                                         | Statistics Portugal. Portugal Hospital Inpatient Discharges 2011.                                                                                                                                                                                                                                                                                                                                                       |   |     | X |     | X | All ages | Both |
| Portugal    | 2012                                                                         | Börsch-Supan, A. (2013). Survey of Health, Ageing and Retirement in Europe (SHARE) Wave 4. Release version: 1.1.1. SHARE-ERIC. Data set. DOI: 10.6103/SHARE.w4.111                                                                                                                                                                                                                                                      | X | 52  | X | 52  |   | 35-100+  | Both |
| Portugal    | 2012                                                                         | Statistics Portugal. Portugal Hospital Inpatient Discharges 2012.                                                                                                                                                                                                                                                                                                                                                       |   |     | X |     | X | All ages | Both |
| Portugal    | 2013                                                                         | ISSP Research Group (2009): International Social Survey Programme: Health and Health Care - ISSP 2011. GESIS Data Archive, Cologne. ZA5800 Data file version 3.0.0, doi:10.4232/1.12252.                                                                                                                                                                                                                                | X | 52  |   |     |   | 0-95     | Both |
| Portugal    | 2013                                                                         | Statistics Portugal. Portugal Hospital Inpatient Discharges 2013.                                                                                                                                                                                                                                                                                                                                                       |   |     | X |     | X | All ages | Both |
| Portugal    | 2014                                                                         | Statistics Portugal. Portugal Hospital Inpatient Discharges 2014.                                                                                                                                                                                                                                                                                                                                                       |   |     | X |     | X | All ages | Both |
| Puerto Rico | 2006                                                                         | University of Puerto Rico, University of Wisconsin - Madison (UW - Madison). Puerto Rican Elderly: Health Conditions, Wave 2 2006-2007. San Juan, Puerto Rico: University of Puerto Rico.                                                                                                                                                                                                                               | X | 52  |   |     |   | 65-100+  | Both |
| Qatar       | 1998                                                                         | Arab Fund for Economic and Social Development (AFESD), Arab Gulf Program for Development (AGFUND), Central Statistical Organization (Qatar), Health Ministers' Council for GCC States, Ministry of Public Health (Qatar), United Nations Children's Fund (UNICEF), United Nations Population Fund (UNFPA), United Nations Statistics Division (UNSD), World Health Organization (WHO). Qatar Family Health Survey 1998. | X | 2   |   |     |   | All ages | Both |
| Romania     | 1980                                                                         | Ministry of Health (Romania). Romania Hospital Inpatient Discharges 1980.                                                                                                                                                                                                                                                                                                                                               |   |     | X |     | X | All ages | Both |
| Romania     | 1985                                                                         | Ministry of Health (Romania). Romania Hospital Inpatient Discharges 1985.                                                                                                                                                                                                                                                                                                                                               |   |     | X |     | X | All ages | Both |
| Romania     | 1986                                                                         | Ministry of Health (Romania). Romania Hospital Inpatient Discharges 1986.                                                                                                                                                                                                                                                                                                                                               |   |     | X |     | X | All ages | Both |
| Romania     | 1987                                                                         | Ministry of Health (Romania). Romania Hospital Inpatient Discharges 1987.                                                                                                                                                                                                                                                                                                                                               |   |     | X |     | X | All ages | Both |
| Romania     | 1988                                                                         | Ministry of Health (Romania). Romania Hospital Inpatient Discharges 1988.                                                                                                                                                                                                                                                                                                                                               |   |     | X |     | X | All ages | Both |
| Romania     | 1989                                                                         | Ministry of Health (Romania). Romania Hospital Inpatient Discharges 1989.                                                                                                                                                                                                                                                                                                                                               |   |     | X |     | X | All ages | Both |
| Romania     | 1990                                                                         | Ministry of Health (Romania). Romania Hospital Inpatient Discharges 1990.                                                                                                                                                                                                                                                                                                                                               |   |     | X |     | X | All ages | Both |
| Romania     | 1991                                                                         | Ministry of Health (Romania). Romania Hospital Inpatient Discharges 1991.                                                                                                                                                                                                                                                                                                                                               |   |     | X |     | X | All ages | Both |



|         |                                                                                                                                                                  |                                                                                                                                                                                                                                                                                  |   |     |   |     |   |          |      |
|---------|------------------------------------------------------------------------------------------------------------------------------------------------------------------|----------------------------------------------------------------------------------------------------------------------------------------------------------------------------------------------------------------------------------------------------------------------------------|---|-----|---|-----|---|----------|------|
| Romania | 1992                                                                                                                                                             | Ministry of Health (Romania). Romania Hospital Inpatient Discharges 1992.                                                                                                                                                                                                        |   |     | X |     | X | All ages | Both |
| Romania | 1993                                                                                                                                                             | Ministry of Health (Romania). Romania Hospital Inpatient Discharges 1993.                                                                                                                                                                                                        |   |     | X |     | X | All ages | Both |
| Romania | 1994                                                                                                                                                             | Ministry of Health (Romania). Romania Hospital Inpatient Discharges 1994.                                                                                                                                                                                                        |   |     | X |     | X | All ages | Both |
| Romania | 1995                                                                                                                                                             | Ministry of Health (Romania). Romania Hospital Inpatient Discharges 1995.                                                                                                                                                                                                        |   |     | X |     | X | All ages | Both |
| Romania | 1996                                                                                                                                                             | Ministry of Health (Romania). Romania Hospital Inpatient Discharges 1996.                                                                                                                                                                                                        |   |     | X |     | X | All ages | Both |
| Romania | 1997                                                                                                                                                             | Ministry of Health (Romania). Romania Hospital Inpatient Discharges 1997.                                                                                                                                                                                                        |   |     | X |     | X | All ages | Both |
| Romania | 1998                                                                                                                                                             | Ministry of Health (Romania). Romania Hospital Inpatient Discharges 1998.                                                                                                                                                                                                        |   |     | X |     | X | All ages | Both |
| Romania | 1999, 2000, 2001, 2002, 2003, 2004, 2005, 2006, 2007, 2008, 2009, 2010, 2011, 2012, 2013, 2014                                                                   | World Health Organization Regional Office for Europe (WHO/Europe). European Health for All Database - Outpatient Contacts Per Person Per Year. Copenhagen, Denmark; World Health Organization Regional Office for Europe (WHO/Europe).                                           | X |     |   |     | X | All ages | Both |
| Romania | 1999                                                                                                                                                             | Ministry of Health (Romania). Romania Hospital Inpatient Discharges 1999.                                                                                                                                                                                                        |   |     | X |     | X | All ages | Both |
| Romania | 2000                                                                                                                                                             | International Research Associates (INRA) Europe, World Health Organization (WHO). Romania WHO Multi-country Survey Study on Health and Health System Responsiveness 2000-2001. Geneva, Switzerland; World Health Organization (WHO).                                             | X | 4.3 | X | 4.3 |   | 15-95    | Both |
| Romania | 2000                                                                                                                                                             | Ministry of Health (Romania). Romania Hospital Inpatient Discharges 2000.                                                                                                                                                                                                        |   |     | X |     | X | All ages | Both |
| Romania | 2001                                                                                                                                                             | Ministry of Health (Romania). Romania Hospital Inpatient Discharges 2001.                                                                                                                                                                                                        |   |     | X |     | X | All ages | Both |
| Romania | 2002                                                                                                                                                             | Ministry of Health (Romania). Romania Hospital Inpatient Discharges 2002.                                                                                                                                                                                                        |   |     | X |     | X | All ages | Both |
| Romania | 2003                                                                                                                                                             | Ministry of Health (Romania). Romania Hospital Inpatient Discharges 2003.                                                                                                                                                                                                        |   |     | X |     | X | All ages | Both |
| Romania | 2004                                                                                                                                                             | Ministry of Health (Romania). Romania Hospital Inpatient Discharges 2004.                                                                                                                                                                                                        |   |     | X |     | X | All ages | Both |
| Romania | 2005, 2006, 2007, 2009, 2010, 2011                                                                                                                               | World Health Organization Regional Office for Europe (WHO/Europe). European Hospital Morbidity Database 1999-2007. Copenhagen, Denmark; World Health Organization Regional Office for Europe (WHO/Europe).                                                                       |   |     | X |     | X | All ages | Both |
| Romania | 2005                                                                                                                                                             | Ministry of Health (Romania). Romania Hospital Inpatient Discharges 2005.                                                                                                                                                                                                        |   |     | X |     | X | All ages | Both |
| Romania | 2013                                                                                                                                                             | Ministry of Health (Romania). Romania Hospital Inpatient Discharges 2013.                                                                                                                                                                                                        |   |     | X |     | X | All ages | Both |
| Russia  | 1987, 1988, 1989, 1990, 1991, 1992, 1993, 1994, 1995, 1996, 1997, 1998, 1999, 2000, 2001, 2002, 2003, 2004, 2005, 2006, 2007, 2009, 2010, 2011, 2012, 2013, 2014 | World Health Organization Regional Office for Europe (WHO/Europe). European Health for All Database - Inpatient Care Discharges Per 100. Copenhagen, Denmark; World Health Organization Regional Office for Europe (WHO/Europe).                                                 |   |     | X |     | X | All ages | Both |
| Russia  | 1992                                                                                                                                                             | Carolina Population Center, University of North Carolina at Chapel Hill, Institute of Sociology, Russian Academy of Sciences, National Research University Higher School of Economics (Russia), ZAO Demoscope. Russia Longitudinal Monitoring Survey of HSE, Round II 1992-1993. | X | 2   | X | 4.3 |   | All ages | Both |

|        |                                                                                          |                                                                                                                                                                                                                                                                                  |   |     |   |      |   |          |      |
|--------|------------------------------------------------------------------------------------------|----------------------------------------------------------------------------------------------------------------------------------------------------------------------------------------------------------------------------------------------------------------------------------|---|-----|---|------|---|----------|------|
| Russia | 1993                                                                                     | Carolina Population Center, University of North Carolina at Chapel Hill, Institute of Sociology, Russian Academy of Sciences, National Research University Higher School of Economics (Russia), ZAO Demoscope. Russia Longitudinal Monitoring Survey of HSE, Round IV 1993-1994. | X | 2   | X | 4.3  |   | All ages | Both |
| Russia | 1994                                                                                     | Russia Longitudinal Monitoring Survey (RLMS-HSE), Round V 1994. National Research University Higher School of Economics, ZAO Demoscope, Carolina Population Center, University of North Carolina at Chapel Hill, Institute of Sociology, Russian Academy of Sciences.            | X | 2   | X | 12.9 |   | 10-100+  | Both |
| Russia | 1995                                                                                     | Russia Longitudinal Monitoring Survey (RLMS-HSE), Round VI 1995. National Research University Higher School of Economics, ZAO Demoscope, Carolina Population Center, University of North Carolina at Chapel Hill, Institute of Sociology, Russian Academy of Sciences.           | X | 2   | X | 12.9 |   | 10-100+  | Both |
| Russia | 1996                                                                                     | Russia Longitudinal Monitoring Survey (RLMS-HSE), Round VII 1996. National Research University Higher School of Economics, ZAO Demoscope, Carolina Population Center, University of North Carolina at Chapel Hill, Institute of Sociology, Russian Academy of Sciences.          | X | 2   | X | 12.9 |   | All ages | Both |
| Russia | 1998                                                                                     | Russia Longitudinal Monitoring Survey (RLMS-HSE), Round VIII 1998-1999. National Research University Higher School of Economics, ZAO Demoscope, Carolina Population Center, University of North Carolina at Chapel Hill, Institute of Sociology, Russian Academy of Sciences.    | X | 2   | X | 12.9 |   | All ages | Both |
| Russia | 1999, 2000                                                                               | World Health Organization Regional Office for Europe (WHO/Europe). European Health for All Database - Outpatient Contacts Per Person Per Year. Copenhagen, Denmark: World Health Organization Regional Office for Europe (WHO/Europe).                                           | X |     |   |      | X | All ages | Both |
| Russia | 2000                                                                                     | Russia Longitudinal Monitoring Survey (RLMS-HSE), Round IX 2000. National Research University Higher School of Economics, ZAO Demoscope, Carolina Population Center, University of North Carolina at Chapel Hill, Institute of Sociology, Russian Academy of Sciences.           | X | 2   |   |      |   | All ages | Both |
| Russia | 2000                                                                                     | International Research Associates (INRA) Europe, World Health Organization (WHO). Russia WHO Multi-country Survey Study on Health and Health System Responsiveness 2000-2001. Geneva, Switzerland: World Health Organization (WHO).                                              | X | 4.3 | X | 4.3  |   | 15-95    | Both |
| Russia | 2001                                                                                     | Russia Longitudinal Monitoring Survey (RLMS-HSE), Round X 2001. National Research University Higher School of Economics, ZAO Demoscope, Carolina Population Center, University of North Carolina at Chapel Hill, Institute of Sociology, Russian Academy of Sciences.            | X | 2   | X | 4.3  |   | All ages | Both |
| Russia | 2001, 2002, 2003, 2004, 2005, 2006, 2007, 2008, 2009, 2010, 2011, 2012, 2013, 2014, 2015 | Organization for Economic Co-operation and Development (OECD). OECD Health Statistics. Paris, France: Organization for Economic Co-operation and Development (OECD).                                                                                                             | X |     |   |      | X | All ages | Both |
| Russia | 2002                                                                                     | Russia Longitudinal Monitoring Survey (RLMS-HSE), Round XI 2002. National Research University Higher School of Economics, ZAO Demoscope, Carolina Population Center, University of North Carolina at Chapel Hill, Institute of Sociology, Russian Academy of Sciences.           | X | 2   | X | 12.9 |   | All ages | Both |
| Russia | 2003                                                                                     | Russia Longitudinal Monitoring Survey (RLMS-HSE), Round XII 2003. National Research University Higher School of Economics, ZAO Demoscope, Carolina Population Center, University of North Carolina at Chapel Hill, Institute of Sociology, Russian Academy of Sciences.          | X | 2   | X | 12.9 |   | All ages | Both |
| Russia | 2003                                                                                     | World Health Organization (WHO). Russia World Health Survey 2003. Geneva, Switzerland: World Health Organization (WHO), 2005.                                                                                                                                                    |   |     | X | 52   |   | 0-95     | Both |
| Russia | 2004                                                                                     | Russia Longitudinal Monitoring Survey (RLMS-HSE), Round XIII 2004. National Research University Higher School of Economics, ZAO Demoscope, Carolina Population Center, University of North Carolina at Chapel Hill, Institute of Sociology, Russian Academy of Sciences.         | X | 4.3 | X | 12.9 |   | All ages | Both |
| Russia | 2005                                                                                     | Russia Longitudinal Monitoring Survey (RLMS-HSE), Round XIV 2005. National Research University Higher School of Economics, ZAO Demoscope, Carolina Population Center, University of North Carolina at Chapel Hill, Institute of Sociology, Russian Academy of Sciences.          | X | 4.3 | X | 8.6  |   | 10-100+  | Both |
| Russia | 2006                                                                                     | Russia Longitudinal Monitoring Survey (RLMS-HSE), Round XV 2006. National Research University Higher School of Economics, ZAO Demoscope, Carolina Population Center, University of North Carolina at Chapel Hill, Institute of Sociology, Russian Academy of Sciences.           |   |     | X | 12.9 |   | All ages | Both |
| Russia | 2007                                                                                     | Russian Academy of Medical Science, World Health Organization (WHO). Russia WHO Study on Global AGEing and Adult Health 2007-2010.                                                                                                                                               | X | 52  |   |      |   | 15-100+  | Both |

|              |                                                      |                                                                                                                                                                                                                                                                                                           |   |     |   |      |   |          |      |
|--------------|------------------------------------------------------|-----------------------------------------------------------------------------------------------------------------------------------------------------------------------------------------------------------------------------------------------------------------------------------------------------------|---|-----|---|------|---|----------|------|
| Russia       | 2007                                                 | Russia Longitudinal Monitoring Survey (RLMS-HSE), Round XVI 2007. National Research University Higher School of Economics, ZAO Demoscope, Carolina Population Center, University of North Carolina at Chapel Hill, Institute of Sociology, Russian Academy of Sciences.                                   | X | 2   | X | 12.9 |   | 10-100+  | Both |
| Russia       | 2008                                                 | Russia Longitudinal Monitoring Survey (RLMS-HSE), Round XVII 2008. National Research University Higher School of Economics, ZAO Demoscope, Carolina Population Center, University of North Carolina at Chapel Hill, Institute of Sociology, Russian Academy of Sciences.                                  | X | 2   | X | 12.9 |   | All ages | Both |
| Russia       | 2009                                                 | Russia Longitudinal Monitoring Survey (RLMS-HSE), Round XVIII 2009. National Research University Higher School of Economics, ZAO Demoscope, Carolina Population Center, University of North Carolina at Chapel Hill, Institute of Sociology, Russian Academy of Sciences.                                 | X | 2   | X | 12.9 |   | 10-100+  | Both |
| Russia       | 2010                                                 | Center for Sociological Studies, Lomonosov Moscow State University, Conclazia-Prim Center for Survey Methodology (Moldova), Institute for Advanced Studies (Austria), London School of Hygiene and Tropical Medicine, University of Aberdeen. Russia Health in Times of Transition Household Survey 2010. |   |     | X | 52   |   | 15-100+  | Both |
| Russia       | 2011                                                 | Russia Longitudinal Monitoring Survey (RLMS-HSE), Round XX 2011-2012. National Research University Higher School of Economics, ZAO Demoscope, Carolina Population Center, University of North Carolina at Chapel Hill, Institute of Sociology, Russian Academy of Sciences.                               | X | 2   |   |      |   | 10-100+  | Both |
| Rwanda       | 2001                                                 | Ministry of Finance and Economic Planning (Rwanda), World Bank. Rwanda Core Welfare Indicators Questionnaire Survey 2001.                                                                                                                                                                                 | X | 4   |   |      |   | All ages | Both |
| Rwanda       | 2010                                                 | National Institute of Statistics of Rwanda. Rwanda Integrated Household Living Conditions Survey 2010-2011. Kigali, Rwanda: National Institute of Statistics of Rwanda.                                                                                                                                   | X | 2   | X | 2    |   | All ages | Both |
| Saint Lucia  | 2004, 2010                                           | Central Statistical Office of Saint Lucia. Saint Lucia Core Welfare Indicators Questionnaire Survey 2004. Saint Lucia: Central Statistical Office of Saint Lucia.                                                                                                                                         | X | 4   |   |      |   | All ages | Both |
| Saudi Arabia | 1995                                                 | Health Ministers' Council for GCC States, Ministry of Health (United Arab Emirates). United Arab Emirates Family Health Survey 1995.                                                                                                                                                                      | X | 2   |   |      |   | All ages | Both |
| Scotland     | 1999, 2001, 2002, 2003, 2004, 2006, 2007, 2009, 2010 | World Health Organization Regional Office for Europe (WHO/Europe). European Hospital Morbidity Database 1999-2007. Copenhagen, Denmark: World Health Organization Regional Office for Europe (WHO/Europe).                                                                                                |   |     | X |      | X | All ages | Both |
| Scotland     | 2006                                                 | Department of Health, Social Services and Public Safety (Northern Ireland), Information Centre for Health and Social Care, NHS, NHS England, NHS Health Scotland, NHS Wales. United Kingdom Hospital Patient and Discharge Data 2006.                                                                     |   |     | X |      | X | All ages | Both |
| Scotland     | 2011                                                 | Trinity College Dublin. Ireland Longitudinal Study on Ageing 2012-2013. Dublin, Ireland: Irish Social Science Data Archive, University College Dublin.                                                                                                                                                    |   |     | X | 52   |   | 50-85    | Both |
| Scotland     | 2012                                                 | Department of Health, Social Services and Public Safety (Northern Ireland), Information Centre for Health and Social Care, NHS, NHS England, NHS Health Scotland, NHS Wales. United Kingdom Hospital Patient and Discharge Data 2012.                                                                     |   |     | X |      | X | All ages | Both |
| Scotland     | 2013                                                 | Department of Health, Social Services and Public Safety (Northern Ireland), Information Centre for Health and Social Care, NHS, NHS England, NHS Health Scotland, NHS Wales. United Kingdom Hospital Patient and Discharge Data 2013.                                                                     |   |     | X |      | X | All ages | Both |
| Scotland     | 2014                                                 | Department of Health, Social Services and Public Safety (Northern Ireland), Information Centre for Health and Social Care, NHS, NHS England, NHS Health Scotland, NHS Wales. United Kingdom Hospital Patient and Discharge Data 2014.                                                                     |   |     | X |      | X | All ages | Both |
| Senegal      | 2003                                                 | World Health Organization (WHO), Senegal World Health Survey 2003. Geneva, Switzerland: World Health Organization (WHO), 2005.                                                                                                                                                                            |   |     | X | 52   |   | All ages | Both |
| Serbia       | 2002                                                 | Ministry of Social Affairs (Serbia), World Bank. Yugoslavia, Federal Republic - Serbia Living Standards Measurement Survey 2002. Washington DC, United States: World Bank.                                                                                                                                | X | 4   | X | 52   |   | All ages | Both |
| Serbia       | 2003                                                 | Ministry of Social Affairs (Serbia), World Bank. Serbia and Montenegro - Serbia Living Standards Measurement Survey 2003. Washington DC, United States: World Bank.                                                                                                                                       | X | 4   | X | 52   |   | All ages | Both |
| Serbia       | 2006                                                 | Institute of Public Health of Serbia. Serbia Outpatient Contacts Per Person Per Year 2006.                                                                                                                                                                                                                | X |     |   |      | X | All ages | Both |
| Serbia       | 2007                                                 | Ministry of Social Affairs (Serbia), World Bank. Serbia Living Standards Measurement Survey 2007. Washington DC, United States: World Bank.                                                                                                                                                               | X | 4.3 | X | 52   |   | All ages | Both |
| Serbia       | 2007                                                 | Institute of Public Health of Serbia. Serbia Outpatient Contacts Per Person Per Year 2007.                                                                                                                                                                                                                | X |     |   |      | X | All ages | Both |
| Serbia       | 2008                                                 | Institute of Public Health of Serbia. Serbia Outpatient Contacts Per Person Per Year 2008.                                                                                                                                                                                                                | X |     |   |      | X | All ages | Both |
| Serbia       | 2009                                                 | Institute of Public Health of Serbia. Serbia Outpatient Contacts Per Person Per Year 2009.                                                                                                                                                                                                                | X |     |   |      | X | All ages | Both |
| Serbia       | 2010                                                 | Institute of Public Health of Serbia. Serbia Inpatient Care Discharges Per 100 2010.                                                                                                                                                                                                                      |   |     | X |      | X | All ages | Both |
| Serbia       | 2010                                                 | Institute of Public Health of Serbia. Serbia Outpatient Contacts Per Person Per Year 2010.                                                                                                                                                                                                                | X |     |   |      | X | All ages | Both |

|              |                                                                                                                                                                                                            |                                                                                                                                                                                                                                        |   |     |   |     |   |          |      |
|--------------|------------------------------------------------------------------------------------------------------------------------------------------------------------------------------------------------------------|----------------------------------------------------------------------------------------------------------------------------------------------------------------------------------------------------------------------------------------|---|-----|---|-----|---|----------|------|
| Serbia       | 2011                                                                                                                                                                                                       | Institute of Public Health of Serbia. Serbia Inpatient Care Discharges Per 100 2011.                                                                                                                                                   |   |     | X |     | X | All ages | Both |
| Serbia       | 2011                                                                                                                                                                                                       | Institute of Public Health of Serbia. Serbia Outpatient Contacts Per Person Per Year 2011.                                                                                                                                             | X |     |   |     | X | All ages | Both |
| Serbia       | 2012                                                                                                                                                                                                       | Institute of Public Health of Serbia. Serbia National Hospital Discharge Database 2012.                                                                                                                                                |   |     | X |     | X | All ages | Both |
| Serbia       | 2012                                                                                                                                                                                                       | Institute of Public Health of Serbia. Serbia Outpatient Contacts Per Person Per Year 2012.                                                                                                                                             | X |     |   |     | X | All ages | Both |
| Serbia       | 2013                                                                                                                                                                                                       | Institute of Public Health of Serbia. Serbia Inpatient Care Discharges Per 100 2013.                                                                                                                                                   |   |     | X |     | X | All ages | Both |
| Serbia       | 2013                                                                                                                                                                                                       | Institute of Public Health of Serbia. Serbia Outpatient Contacts Per Person Per Year 2013.                                                                                                                                             | X |     |   |     | X | All ages | Both |
| Serbia       | 2014                                                                                                                                                                                                       | Institute of Public Health of Serbia. Serbia Inpatient Care Discharges Per 100 2014.                                                                                                                                                   |   |     | X |     | X | All ages | Both |
| Serbia       | 2014                                                                                                                                                                                                       | Institute of Public Health of Serbia. Serbia Outpatient Contacts Per Person Per Year 2014.                                                                                                                                             | X |     |   |     | X | All ages | Both |
| Seychelles   | 2013                                                                                                                                                                                                       | Ministry of Health (Seychelles), World Health Organization (WHO). Seychelles STEPS Noncommunicable Disease Risk Factors Survey 2013-2014.                                                                                              | X | 52  |   |     |   | 25-64    | Both |
| Sierra Leone | 2003                                                                                                                                                                                                       | Statistics Sierra Leone, World Bank (WB). Sierra Leone Integrated Household Survey 2003-2004. Sierra Leone: Statistics Sierra Leone.                                                                                                   | X | 2   |   |     |   | All ages | Both |
| Sierra Leone | 2007                                                                                                                                                                                                       | Statistics Sierra Leone, World Bank. Sierra Leone Core Welfare Indicators Questionnaire Survey 2007.                                                                                                                                   | X | 4   |   |     |   | All ages | Both |
| Slovakia     | 1981, 1982, 1983, 1984, 1985, 1986, 1987, 1988, 1989, 1990, 1991, 1992, 1993, 1994, 1995, 1996, 1997, 1998, 1999, 2000, 2001, 2002, 2003, 2004, 2005, 2006, 2007, 2008, 2009, 2010, 2011, 2012, 2013, 2015 | World Health Organization Regional Office for Europe (WHO/Europe). European Health for All Database - Inpatient Care Discharges Per 100. Copenhagen, Denmark: World Health Organization Regional Office for Europe (WHO/Europe).       |   |     | X |     | X | All ages | Both |
| Slovakia     | 1995, 1998, 1999, 2000                                                                                                                                                                                     | World Health Organization Regional Office for Europe (WHO/Europe). European Health for All Database - Outpatient Contacts Per Person Per Year. Copenhagen, Denmark: World Health Organization Regional Office for Europe (WHO/Europe). | X |     |   |     | X | All ages | Both |
| Slovakia     | 2000                                                                                                                                                                                                       | Public Health Authority of the Slovak Republic, World Health Organization (WHO). Slovakia WHO Multi-country Survey Study on Health and Health System Responsiveness 2000.                                                              | X | 4.3 | X | 4.3 |   | 0-90     | Both |
| Slovakia     | 2001, 2002, 2003, 2004, 2005, 2006, 2007, 2008, 2009, 2010, 2011, 2012, 2013, 2014, 2015                                                                                                                   | Organization for Economic Co-operation and Development (OECD). OECD Health Statistics. Paris, France: Organization for Economic Co-operation and Development (OECD).                                                                   | X |     |   |     | X | All ages | Both |
| Slovakia     | 2003                                                                                                                                                                                                       | World Health Organization (WHO). Slovakia World Health Survey 2003. Geneva, Switzerland: World Health Organization (WHO), 2005.                                                                                                        |   |     | X | 52  |   | All ages | Both |
| Slovakia     | 2011                                                                                                                                                                                                       | ISSP Research Group (2009): International Social Survey Programme: Health and Health Care - ISSP 2011. GESIS Data Archive, Cologne. ZA5800 Data file version 3.0.0, doi:10.4232/1.12252.                                               | X | 52  |   |     |   | 15-95    | Both |
| Slovenia     | 1980                                                                                                                                                                                                       | National Institute of Public Health (Slovenia). Slovenia National Hospital Health Care Statistics Database 1980.                                                                                                                       |   |     | X |     | X | All ages | Both |
| Slovenia     | 1985                                                                                                                                                                                                       | National Institute of Public Health (Slovenia). Slovenia National Hospital Health Care Statistics Database 1985.                                                                                                                       |   |     | X |     | X | All ages | Both |

|              |                                                      |                                                                                                                                                                                                            |   |     |   |     |   |          |      |
|--------------|------------------------------------------------------|------------------------------------------------------------------------------------------------------------------------------------------------------------------------------------------------------------|---|-----|---|-----|---|----------|------|
| Slovenia     | 1986                                                 | National Institute of Public Health (Slovenia). Slovenia National Hospital Health Care Statistics Database 1986.                                                                                           |   |     | X |     | X | All ages | Both |
| Slovenia     | 1987                                                 | National Institute of Public Health (Slovenia). Slovenia National Hospital Health Care Statistics Database 1987.                                                                                           |   |     | X |     | X | All ages | Both |
| Slovenia     | 1988                                                 | National Institute of Public Health (Slovenia). Slovenia National Hospital Health Care Statistics Database 1988.                                                                                           |   |     | X |     | X | All ages | Both |
| Slovenia     | 1989                                                 | National Institute of Public Health (Slovenia). Slovenia National Hospital Health Care Statistics Database 1989.                                                                                           |   |     | X |     | X | All ages | Both |
| Slovenia     | 1990                                                 | National Institute of Public Health (Slovenia). Slovenia National Hospital Health Care Statistics Database 1990.                                                                                           |   |     | X |     | X | All ages | Both |
| Slovenia     | 1991                                                 | National Institute of Public Health (Slovenia). Slovenia National Hospital Health Care Statistics Database 1991.                                                                                           |   |     | X |     | X | All ages | Both |
| Slovenia     | 1992                                                 | National Institute of Public Health (Slovenia). Slovenia National Hospital Health Care Statistics Database 1992.                                                                                           |   |     | X |     | X | All ages | Both |
| Slovenia     | 1993                                                 | National Institute of Public Health (Slovenia). Slovenia National Hospital Health Care Statistics Database 1993.                                                                                           |   |     | X |     | X | All ages | Both |
| Slovenia     | 1994                                                 | National Institute of Public Health (Slovenia). Slovenia National Hospital Health Care Statistics Database 1994.                                                                                           |   |     | X |     | X | All ages | Both |
| Slovenia     | 1995                                                 | National Institute of Public Health (Slovenia). Slovenia National Hospital Health Care Statistics Database 1995.                                                                                           |   |     | X |     | X | All ages | Both |
| Slovenia     | 1996                                                 | National Institute of Public Health (Slovenia). Slovenia National Hospital Health Care Statistics Database 1996.                                                                                           |   |     | X |     | X | All ages | Both |
| Slovenia     | 1997                                                 | National Institute of Public Health (Slovenia). Slovenia National Hospital Health Care Statistics Database 1997.                                                                                           |   |     | X |     | X | All ages | Both |
| Slovenia     | 1998                                                 | National Institute of Public Health (Slovenia). Slovenia National Hospital Health Care Statistics Database 1998.                                                                                           |   |     | X |     | X | All ages | Both |
| Slovenia     | 1999                                                 | National Institute of Public Health (Slovenia). Slovenia National Hospital Health Care Statistics Database 1999.                                                                                           |   |     | X |     | X | All ages | Both |
| Slovenia     | 2000                                                 | National Institute of Public Health (Slovenia). Slovenia National Hospital Health Care Statistics Database 2000.                                                                                           |   |     | X |     | X | All ages | Both |
| Slovenia     | 2001                                                 | National Institute of Public Health (Slovenia). Slovenia National Hospital Health Care Statistics Database 2001.                                                                                           |   |     | X |     | X | All ages | Both |
| Slovenia     | 2002                                                 | National Institute of Public Health (Slovenia). Slovenia National Hospital Health Care Statistics Database 2002.                                                                                           |   |     | X |     | X | All ages | Both |
| Slovenia     | 2003                                                 | World Health Organization (WHO). Slovenia World Health Survey 2003. Geneva, Switzerland: World Health Organization (WHO), 2005.                                                                            |   |     | X | 52  |   | 15-95    | Both |
| Slovenia     | 2003                                                 | National Institute of Public Health (Slovenia). Slovenia National Hospital Health Care Statistics Database 2003.                                                                                           |   |     | X |     | X | All ages | Both |
| Slovenia     | 2004                                                 | National Institute of Public Health (Slovenia). Slovenia National Hospital Health Care Statistics Database 2004.                                                                                           |   |     | X |     | X | All ages | Both |
| Slovenia     | 2005                                                 | National Institute of Public Health (Slovenia). Slovenia National Hospital Health Care Statistics Database 2005.                                                                                           |   |     | X |     | X | All ages | Both |
| Slovenia     | 2006                                                 | National Institute of Public Health (Slovenia). Slovenia National Hospital Health Care Statistics Database 2006.                                                                                           |   |     | X |     | X | All ages | Both |
| Slovenia     | 2007, 2009, 2010, 2011                               | World Health Organization Regional Office for Europe (WHO/Europe). European Hospital Morbidity Database 1999-2007. Copenhagen, Denmark: World Health Organization Regional Office for Europe (WHO/Europe). |   |     | X |     | X | All ages | Both |
| Slovenia     | 2007, 2008, 2009, 2010, 2011, 2012, 2013, 2014, 2015 | Organization for Economic Co-operation and Development (OECD). OECD Health Statistics. Paris, France: Organization for Economic Co-operation and Development (OECD).                                       | X |     |   |     | X | All ages | Both |
| Slovenia     | 2007                                                 | National Institute of Public Health (Slovenia). Slovenia National Hospital Health Care Statistics Database 2007.                                                                                           |   |     | X |     | X | All ages | Both |
| Slovenia     | 2008                                                 | National Institute of Public Health (Slovenia). Slovenia National Hospital Health Care Statistics Database 2008.                                                                                           |   |     | X |     | X | All ages | Both |
| Slovenia     | 2011                                                 | ISSP Research Group (2009): International Social Survey Programme: Health and Health Care - ISSP 2011. GESIS Data Archive, Cologne. ZA5800 Data file version 3.0.0, doi:10.4232/1.12252.                   | X | 52  |   |     |   | 15-100+  | Both |
| Slovenia     | 2012                                                 | Börsch-Supan, A. (2013). Survey of Health, Ageing and Retirement in Europe (SHARE) Wave 4. Release version: 1.1.1. SHARE-ERIC. Data set. DOI: 10.6103/SHARE.w4.111                                         | X | 52  | X | 52  |   | 35-100+  | Both |
| Slovenia     | 2013                                                 | Börsch-Supan, A. (2015). Survey of Health, Ageing and Retirement in Europe (SHARE) Wave 5. Release version: 1.0.0. SHARE-ERIC. Data set. DOI: 10.6103/SHARE.w5.100                                         | X | 52  | X | 52  |   | All ages | Both |
| Slovenia     | 2013                                                 | National Institute of Public Health (Slovenia). Slovenia National Hospital Health Care Statistics Database 2013.                                                                                           |   |     | X |     | X | All ages | Both |
| Slovenia     | 2014                                                 | National Institute of Public Health (Slovenia). Slovenia National Hospital Health Care Statistics Database 2014.                                                                                           |   |     | X |     | X | All ages | Both |
| South Africa | 1993                                                 | Southern Africa Labour Development Research Unit (SALDRU), University of Cape Town, World Bank. South Africa Living Standards Measurement Study 1993. Washington DC, United States: World Bank.            | X | 4   |   |     |   | All ages | Both |
| South Africa | 1994                                                 | Central Statistical Service (South Africa). South Africa October Household Survey 1994.                                                                                                                    |   |     | X | 4.3 |   | All ages | Both |
| South Africa | 1995                                                 | Central Statistical Service (South Africa). South Africa October Household Survey 1995.                                                                                                                    | X | 4.3 |   |     |   | All ages | Both |

|              |                                                                                    |                                                                                                                                                                                                                                                                          |   |     |   |     |   |          |      |
|--------------|------------------------------------------------------------------------------------|--------------------------------------------------------------------------------------------------------------------------------------------------------------------------------------------------------------------------------------------------------------------------|---|-----|---|-----|---|----------|------|
| South Africa | 1996                                                                               | Central Statistical Service (South Africa). South Africa October Household Survey 1996.                                                                                                                                                                                  | X | 4.3 | X | 4.3 |   | All ages | Both |
| South Africa | 2001, 2002, 2003, 2004, 2005, 2006, 2007, 2008, 2009, 2010, 2011, 2012, 2013       | Organization for Economic Co-operation and Development (OECD). OECD Health Statistics. Paris, France: Organization for Economic Co-operation and Development (OECD).                                                                                                     | X |     |   |     | X | All ages | Both |
| South Africa | 2002                                                                               | Statistics South Africa. South Africa General Household Survey 2002. Pretoria, South Africa: Statistics South Africa.                                                                                                                                                    | X | 4.3 |   |     |   | All ages | Both |
| South Africa | 2003                                                                               | Statistics South Africa. South Africa General Household Survey 2003. Pretoria, South Africa: Statistics South Africa.                                                                                                                                                    | X | 4.3 |   |     |   | All ages | Both |
| South Africa | 2004                                                                               | Statistics South Africa. South Africa General Household Survey 2004. Pretoria, South Africa: Statistics South Africa.                                                                                                                                                    | X | 4.3 |   |     |   | All ages | Both |
| South Africa | 2005                                                                               | Statistics South Africa. South Africa General Household Survey 2005. Pretoria, South Africa: Statistics South Africa.                                                                                                                                                    | X | 4.3 |   |     |   | All ages | Both |
| South Africa | 2006                                                                               | Statistics South Africa. South Africa General Household Survey 2006. Pretoria, South Africa: Statistics South Africa.                                                                                                                                                    | X | 4.3 |   |     |   | All ages | Both |
| South Africa | 2007                                                                               | Statistics South Africa. South Africa General Household Survey 2007. Cape Town, South Africa: DataFirst.                                                                                                                                                                 | X | 4.3 |   |     |   | All ages | Both |
| South Africa | 2007                                                                               | Department of Health (South Africa), Human Sciences Research Council, World Health Organization (WHO). South Africa WHO Study on Global AGEing and Adult Health 2007-2008. Geneva, Switzerland: World Health Organization (WHO).                                         | X | 52  |   |     |   | 15-100+  | Both |
| South Africa | 2008                                                                               | University of Cape Town, Southern Africa Labour and Development Research Unit. National Income Dynamics Study (NIDS) Wave 1 [computer files]. Cape Town: Southern Africa Labour and Development Research Unit [producer], 2009. Cape Town: DataFirst [distributor], 2009 | X | 4.3 |   |     |   | 0-20     | Both |
| South Africa | 2008                                                                               | Statistics South Africa. South Africa General Household Survey 2008. Pretoria, South Africa: Statistics South Africa.                                                                                                                                                    | X | 4.3 |   |     |   | All ages | Both |
| South Africa | 2008                                                                               | Statistics South Africa. South Africa Living Conditions Survey 2008-2009. Pretoria, South Africa: Statistics South Africa.                                                                                                                                               | X | 4.3 |   |     |   | All ages | Both |
| South Africa | 2009                                                                               | Statistics South Africa. South Africa General Household Survey 2009. Pretoria, South Africa: Statistics South Africa.                                                                                                                                                    | X | 4.3 |   |     |   | All ages | Both |
| South Africa | 2010                                                                               | Statistics South Africa. South Africa General Household Survey 2010. Pretoria, South Africa: Statistics South Africa.                                                                                                                                                    | X | 4.3 |   |     |   | All ages | Both |
| South Africa | 2010                                                                               | Statistics South Africa. South Africa Income and Expenditure Survey 2010-2011. Pretoria, South Africa: Statistics South Africa.                                                                                                                                          | X | 4.3 |   |     |   | All ages | Both |
| South Africa | 2011                                                                               | ISSP Research Group (2009): International Social Survey Programme: Health and Health Care - ISSP 2011. GESIS Data Archive, Cologne. ZA5800 Data file version 3.0.0, doi:10.4232/1.12252.                                                                                 | X | 52  |   |     |   | All ages | Both |
| South Africa | 2012                                                                               | Southern Africa Labour and Development Research Unit. National Income Dynamics Study 2012, Wave 3 [dataset]. Version 1.2. Cape Town: Southern Africa Labour and Development Research Unit [producer], 2013. Cape Town: DataFirst [distributor], 2013                     | X | 4.3 |   |     |   | All ages | Both |
| South Africa | 2012                                                                               | Statistics South Africa. South Africa General Household Survey 2012. Pretoria, South Africa: Statistics South Africa, 2013.                                                                                                                                              | X | 4.3 |   |     |   | All ages | Both |
| South Africa | 2012                                                                               | Human Sciences Research Council, South African Medical Research Council. South Africa National Health and Nutrition Examination Survey 2012.                                                                                                                             |   |     | X | 52  |   | 15-100+  | Both |
| South Korea  | 1996, 1999, 2002, 2003, 2005, 2006, 2008, 2009, 2010, 2011, 2012, 2013, 2014, 2015 | Organization for Economic Co-operation and Development (OECD). OECD Health Statistics. Paris, France: Organization for Economic Co-operation and Development (OECD).                                                                                                     |   |     | X |     | X | All ages | Both |
| South Korea  | 2000                                                                               | Graduate School of Public Health, Seoul National University, World Health Organization (WHO). South Korea WHO Multi-country Survey Study on Health and Health System Responsiveness 2000-2001. Geneva, Switzerland: World Health Organization (WHO).                     | X | 4.3 | X | 4.3 |   | All ages | Both |
| Spain        | 1972                                                                               | Ministry of Health, Social Services and Equality (Spain), National Statistics Institute (Spain). Spain Statistics on Health Establishments Providing Inpatient Care 1972.                                                                                                |   |     | X |     | X | All ages | Both |
| Spain        | 1973                                                                               | Ministry of Health, Social Services and Equality (Spain), National Statistics Institute (Spain). Spain Statistics on Health Establishments Providing Inpatient Care 1973.                                                                                                |   |     | X |     | X | All ages | Both |
| Spain        | 1974                                                                               | Ministry of Health, Social Services and Equality (Spain), National Statistics Institute (Spain). Spain Statistics on Health Establishments Providing Inpatient Care 1974.                                                                                                |   |     | X |     | X | All ages | Both |





|           |      |                                                                                                                                                                                                                    |   |    |   |    |   |          |      |
|-----------|------|--------------------------------------------------------------------------------------------------------------------------------------------------------------------------------------------------------------------|---|----|---|----|---|----------|------|
| Spain     | 2003 | Ministry of Health, Social Services and Equality (Spain). Spain Statistics on Health Establishments Providing Inpatient Care 2003.                                                                                 |   |    | X |    | X | All ages | Both |
| Spain     | 2004 | Ministry of Health, Social Services and Equality (Spain), Sociological Research Center (Spain). Spain Health Barometer Survey 2004. Madrid, Spain: Ministry of Health, Social Services and Equality (Spain), 2004. | X | 52 | X | 52 |   | All ages | Both |
| Spain     | 2004 | Ministry of Health, Social Services and Equality (Spain). Spain Statistics on Health Establishments Providing Inpatient Care 2004.                                                                                 |   |    | X |    | X | All ages | Both |
| Spain     | 2005 | Ministry of Health, Social Services and Equality (Spain). Spain Statistics on Health Establishments Providing Inpatient Care 2005.                                                                                 |   |    | X |    | X | All ages | Both |
| Spain     | 2006 | Ministry of Health, Social Services and Equality (Spain), National Statistics Institute (Spain). Spain National Health Survey 2006-2007.                                                                           | X | 4  | X | 52 |   | 15-100+  | Both |
| Spain     | 2006 | Börsch-Supan, A. (2013). Survey of Health, Ageing and Retirement in Europe (SHARE) Wave 1. Release version: 2.6.0. SHARE-ERIC. Data set. DOI: 10.6103/SHARE.w1.260                                                 | X | 52 | X | 52 |   | All ages | Both |
| Spain     | 2006 | Ministry of Health, Social Services and Equality (Spain). Spain Statistics on Health Establishments Providing Inpatient Care 2006.                                                                                 |   |    | X |    | X | All ages | Both |
| Spain     | 2007 | Ministry of Health, Social Services and Equality (Spain). Spain Statistics on Health Establishments Providing Inpatient Care 2007.                                                                                 |   |    | X |    | X | All ages | Both |
| Spain     | 2008 | Ministry of Health, Social Services and Equality (Spain). Spain Statistics on Health Establishments Providing Inpatient Care 2008.                                                                                 |   |    | X |    | X | All ages | Both |
| Spain     | 2009 | Ministry of Health, Social Services and Equality (Spain). Spain Statistics on Health Establishments Providing Inpatient Care 2009.                                                                                 |   |    | X |    | X | All ages | Both |
| Spain     | 2010 | Börsch-Supan, A. (2013). Survey of Health, Ageing and Retirement in Europe (SHARE) Wave 2. Release version: 2.6.0. SHARE-ERIC. Data set. DOI: 10.6103/SHARE.w2.260                                                 | X | 52 | X | 52 |   | 35-100+  | Both |
| Spain     | 2010 | Ministry of Health, Social Services and Equality (Spain). Spain Statistics on Health Establishments Providing Inpatient Care 2010.                                                                                 |   |    | X |    | X | All ages | Both |
| Spain     | 2011 | Ministry of Health, Social Services and Equality (Spain). Spain Statistics on Health Establishments Providing Inpatient Care 2011.                                                                                 |   |    | X |    | X | All ages | Both |
| Spain     | 2012 | Börsch-Supan, A. (2013). Survey of Health, Ageing and Retirement in Europe (SHARE) Wave 4. Release version: 1.1.1. SHARE-ERIC. Data set. DOI: 10.6103/SHARE.w4.111                                                 | X | 52 | X | 52 |   | 25-100+  | Both |
| Spain     | 2012 | Ministry of Health, Social Services and Equality (Spain). Spain Statistics on Health Establishments Providing Inpatient Care 2012.                                                                                 |   |    | X |    | X | All ages | Both |
| Spain     | 2013 | Börsch-Supan, A. (2015). Survey of Health, Ageing and Retirement in Europe (SHARE) Wave 5. Release version: 1.0.0. SHARE-ERIC. Data set. DOI: 10.6103/SHARE.w5.100                                                 | X | 52 | X | 52 |   | All ages | Both |
| Spain     | 2013 | Ministry of Health, Social Services and Equality (Spain). Spain Statistics on Health Establishments Providing Inpatient Care 2013.                                                                                 |   |    | X |    | X | All ages | Both |
| Spain     | 2014 | Ministry of Health, Social Services and Equality (Spain). Spain Statistics on Health Establishments Providing Inpatient Care 2014.                                                                                 |   |    | X |    | X | All ages | Both |
| Sri Lanka | 2003 | World Health Organization (WHO). Sri Lanka World Health Survey 2003. Geneva, Switzerland: World Health Organization (WHO), 2005.                                                                                   |   |    | X | 52 |   | 15-100+  | Both |
| Swaziland | 2003 | World Health Organization (WHO). Swaziland World Health Survey 2003. Geneva, Switzerland: World Health Organization (WHO), 2005.                                                                                   |   |    | X | 52 |   | All ages | Both |
| Sweden    | 1987 | National Board of Health and Welfare (Sweden). Sweden National Patient Register 1987.                                                                                                                              |   |    | X |    | X | All ages | Both |
| Sweden    | 1988 | National Board of Health and Welfare (Sweden). Sweden National Patient Register 1988.                                                                                                                              |   |    | X |    | X | All ages | Both |
| Sweden    | 1989 | National Board of Health and Welfare (Sweden). Sweden National Patient Register 1989.                                                                                                                              |   |    | X |    | X | All ages | Both |
| Sweden    | 1990 | National Board of Health and Welfare (Sweden). Sweden National Patient Register 1990.                                                                                                                              |   |    | X |    | X | All ages | Both |
| Sweden    | 1991 | National Board of Health and Welfare (Sweden). Sweden National Patient Register 1991.                                                                                                                              |   |    | X |    | X | All ages | Both |
| Sweden    | 1992 | National Board of Health and Welfare (Sweden). Sweden National Patient Register 1992.                                                                                                                              |   |    | X |    | X | All ages | Both |
| Sweden    | 1993 | National Board of Health and Welfare (Sweden). Sweden National Patient Register 1993.                                                                                                                              |   |    | X |    | X | All ages | Both |
| Sweden    | 1994 | National Board of Health and Welfare (Sweden). Sweden National Patient Register 1994.                                                                                                                              |   |    | X |    | X | All ages | Both |
| Sweden    | 1995 | National Board of Health and Welfare (Sweden). Sweden National Patient Register 1995.                                                                                                                              |   |    | X |    | X | All ages | Both |
| Sweden    | 1996 | National Board of Health and Welfare (Sweden). Sweden National Patient Register 1996.                                                                                                                              |   |    | X |    | X | All ages | Both |
| Sweden    | 1997 | National Board of Health and Welfare (Sweden). Sweden National Patient Register 1997.                                                                                                                              |   |    | X |    | X | All ages | Both |
| Sweden    | 1998 | National Board of Health and Welfare (Sweden). Sweden National Patient Register 1998. Stockholm, Sweden: National Board of Health and Welfare (Sweden).                                                            |   |    | X |    | X | All ages | Both |



|             |                                                                                    |                                                                                                                                                                                                                                                      |   |      |   |      |   |          |      |
|-------------|------------------------------------------------------------------------------------|------------------------------------------------------------------------------------------------------------------------------------------------------------------------------------------------------------------------------------------------------|---|------|---|------|---|----------|------|
| Sweden      | 1999, 2001, 2002, 2003, 2004, 2005, 2006, 2007, 2009                               | World Health Organization Regional Office for Europe (WHO/Europe). European Hospital Morbidity Database 1999-2007. Copenhagen, Denmark: World Health Organization Regional Office for Europe (WHO/Europe).                                           |   |      | X |      | X | All ages | Both |
| Sweden      | 1999                                                                               | National Board of Health and Welfare (Sweden). Sweden National Patient Register 1999. Stockholm, Sweden: National Board of Health and Welfare (Sweden).                                                                                              |   |      | X |      | X | All ages | Both |
| Sweden      | 2000                                                                               | International Research Associates (INRA) Europe, World Health Organization (WHO). Sweden WHO Multi-country Survey Study on Health and Health System Responsiveness 2000-2001. Geneva, Switzerland: World Health Organization (WHO).                  | X | 4.3  | X | 4.3  |   | 15-95    | Both |
| Sweden      | 2002, 2003, 2004, 2005, 2006, 2007, 2008, 2009, 2010, 2011, 2012, 2013, 2014, 2015 | Organization for Economic Co-operation and Development (OECD). OECD Health Statistics. Paris, France: Organization for Economic Co-operation and Development (OECD).                                                                                 | X |      |   |      | X | All ages | Both |
| Sweden      | 2003                                                                               | World Health Organization (WHO). Sweden World Health Survey 2003. Geneva, Switzerland: World Health Organization (WHO), 2005.                                                                                                                        |   |      | X | 52   |   | 15-95    | Both |
| Sweden      | 2004                                                                               | Statistics Sweden, Swedish National Institute of Public Health. Sweden National Survey of Public Health 2004.                                                                                                                                        |   |      | X | 12.9 |   | 16-84    | Both |
| Sweden      | 2005                                                                               | Statistics Sweden, Swedish National Institute of Public Health. Sweden National Survey of Public Health 2005.                                                                                                                                        | X | 12.9 | X | 12.9 |   | 16-84    | Both |
| Sweden      | 2006, 2007                                                                         | Statistics Sweden, Swedish National Institute of Public Health. Sweden National Survey of Public Health 2007.                                                                                                                                        | X | 12.9 | X | 12.9 |   | 16-84    | Both |
| Sweden      | 2006                                                                               | Börsch-Supan, A. (2013). Survey of Health, Ageing and Retirement in Europe (SHARE) Wave 1. Release version: 2.6.0. SHARE-ERIC. Data set. DOI: 10.6103/SHARE.w1.260                                                                                   | X | 52   | X | 52   |   | All ages | Both |
| Sweden      | 2008                                                                               | Statistics Sweden, Swedish National Institute of Public Health. Sweden National Survey of Public Health 2008.                                                                                                                                        | X | 12.9 | X | 12.9 |   | 16-84    | Both |
| Sweden      | 2009                                                                               | Statistics Sweden, Swedish National Institute of Public Health. Sweden National Survey of Public Health 2009.                                                                                                                                        | X | 12.9 | X | 12.9 |   | 16-84    | Both |
| Sweden      | 2010                                                                               | Börsch-Supan, A. (2013). Survey of Health, Ageing and Retirement in Europe (SHARE) Wave 2. Release version: 2.6.0. SHARE-ERIC. Data set. DOI: 10.6103/SHARE.w2.260                                                                                   | X | 52   | X | 52   |   | 25-100+  | Both |
| Sweden      | 2010                                                                               | Statistics Sweden, Swedish National Institute of Public Health. Sweden National Survey of Public Health 2010.                                                                                                                                        | X | 12.9 | X | 12.9 |   | 16-84    | Both |
| Sweden      | 2011                                                                               | National Board of Health and Welfare (Sweden). Sweden National Patient Register 2011. Stockholm, Sweden: National Board of Health and Welfare (Sweden).                                                                                              |   |      | X |      | X | All ages | Both |
| Sweden      | 2011                                                                               | Statistics Sweden, Swedish National Institute of Public Health. Sweden National Survey of Public Health 2011.                                                                                                                                        | X | 12.9 | X | 12.9 |   | 16-84    | Both |
| Sweden      | 2011                                                                               | ISSP Research Group (2009): International Social Survey Programme: Health and Health Care - ISSP 2011. GESIS Data Archive, Cologne. ZA5800 Data file version 3.0.0, doi:10.4232/1.12252.                                                             | X | 52   |   |      |   | 15-85    | Both |
| Sweden      | 2012                                                                               | National Board of Health and Welfare (Sweden). Sweden National Patient Register 2012. Stockholm, Sweden: National Board of Health and Welfare (Sweden).                                                                                              |   |      | X |      | X | All ages | Both |
| Sweden      | 2012                                                                               | Statistics Sweden, Swedish National Institute of Public Health. Sweden National Survey of Public Health 2012.                                                                                                                                        | X | 12.9 | X | 12.9 |   | 16-84    | Both |
| Sweden      | 2012                                                                               | Börsch-Supan, A. (2013). Survey of Health, Ageing and Retirement in Europe (SHARE) Wave 4. Release version: 1.1.1. SHARE-ERIC. Data set. DOI: 10.6103/SHARE.w4.111                                                                                   | X | 52   | X | 52   |   | 30-100+  | Both |
| Sweden      | 2013                                                                               | Statistics Sweden, Swedish National Institute of Public Health. Sweden National Survey of Public Health 2013.                                                                                                                                        | X | 12.9 | X | 12.9 |   | 16-84    | Both |
| Sweden      | 2013                                                                               | Börsch-Supan, A. (2015). Survey of Health, Ageing and Retirement in Europe (SHARE) Wave 5. Release version: 1.0.0. SHARE-ERIC. Data set. DOI: 10.6103/SHARE.w5.100                                                                                   | X | 52   | X | 52   |   | All ages | Both |
| Sweden      | 2013                                                                               | National Board of Health and Welfare (Sweden). Sweden National Patient Register 2013.                                                                                                                                                                |   |      | X |      | X | All ages | Both |
| Sweden      | 2014                                                                               | Public Health Agency of Sweden, Statistics Sweden. Sweden National Survey of Public Health 2014.                                                                                                                                                     | X | 12.9 | X | 12.9 |   | 16-84    | Both |
| Sweden      | 2014                                                                               | National Board of Health and Welfare (Sweden). Sweden National Patient Register 2014.                                                                                                                                                                |   |      | X |      | X | All ages | Both |
| Switzerland | 1997                                                                               | Federal Statistical Office (Switzerland). Switzerland Medical Statistics of Hospitals 1997.                                                                                                                                                          |   |      | X |      | X | All ages | Both |
| Switzerland | 1998                                                                               | Federal Statistical Office (Switzerland). Switzerland Medical Statistics of Hospitals 1998.                                                                                                                                                          |   |      | X |      | X | All ages | Both |
| Switzerland | 2000                                                                               | LINK Institute for Market and Social Research (Switzerland), World Health Organization (WHO). Switzerland WHO Multi-country Survey Study on Health and Health System Responsiveness 2000-2001. Geneva, Switzerland: World Health Organization (WHO). | X | 4.3  | X | 4.3  |   | 0-95     | Both |

|             |                                                                                                                                                                                          |                                                                                                                                                                                                                                        |   |     |   |     |   |          |      |
|-------------|------------------------------------------------------------------------------------------------------------------------------------------------------------------------------------------|----------------------------------------------------------------------------------------------------------------------------------------------------------------------------------------------------------------------------------------|---|-----|---|-----|---|----------|------|
| Switzerland | 2001, 2002, 2003, 2004, 2005, 2006, 2007, 2009, 2010, 2011                                                                                                                               | World Health Organization Regional Office for Europe (WHO/Europe). European Hospital Morbidity Database 1999-2007. Copenhagen, Denmark: World Health Organization Regional Office for Europe (WHO/Europe).                             |   |     | X |     | X | All ages | Both |
| Switzerland | 2003, 2008, 2013                                                                                                                                                                         | Organization for Economic Co-operation and Development (OECD). OECD Health Statistics. Paris, France: Organization for Economic Co-operation and Development (OECD).                                                                   | X |     |   |     | X | All ages | Both |
| Switzerland | 2006                                                                                                                                                                                     | Börsch-Supan, A. (2013). Survey of Health, Ageing and Retirement in Europe (SHARE) Wave 1. Release version: 2.6.0. SHARE-ERIC. Data set. DOI: 10.6103/SHARE.w1.260                                                                     | X | 52  | X | 52  |   | All ages | Both |
| Switzerland | 2010                                                                                                                                                                                     | Börsch-Supan, A. (2013). Survey of Health, Ageing and Retirement in Europe (SHARE) Wave 2. Release version: 2.6.0. SHARE-ERIC. Data set. DOI: 10.6103/SHARE.w2.260                                                                     | X | 52  | X | 52  |   | 35-100+  | Both |
| Switzerland | 2011                                                                                                                                                                                     | ISSP Research Group (2009): International Social Survey Programme: Health and Health Care - ISSP 2011. GESIS Data Archive, Cologne. ZA5800 Data file version 3.0.0, doi:10.4232/1.12252.                                               | X | 52  |   |     |   | 15-100+  | Both |
| Switzerland | 2012                                                                                                                                                                                     | Börsch-Supan, A. (2013). Survey of Health, Ageing and Retirement in Europe (SHARE) Wave 4. Release version: 1.1.1. SHARE-ERIC. Data set. DOI: 10.6103/SHARE.w4.111                                                                     | X | 52  | X | 52  |   | 30-100+  | Both |
| Switzerland | 2013                                                                                                                                                                                     | Börsch-Supan, A. (2015). Survey of Health, Ageing and Retirement in Europe (SHARE) Wave 5. Release version: 1.0.0. SHARE-ERIC. Data set. DOI: 10.6103/SHARE.w5.100                                                                     | X | 52  | X | 52  |   | All ages | Both |
| Switzerland | 2013                                                                                                                                                                                     | Federal Statistical Office (Switzerland). Switzerland Medical Statistics of Hospitals 2013.                                                                                                                                            |   |     | X |     | X | All ages | Both |
| Switzerland | 2014                                                                                                                                                                                     | Federal Statistical Office (Switzerland). Switzerland Medical Statistics of Hospitals 2014.                                                                                                                                            |   |     | X |     | X | All ages | Both |
| Syria       | 2000                                                                                                                                                                                     | Ministry of Health (Syria), World Health Organization (WHO). Syria WHO Multi-country Survey Study on Health and Health System Responsiveness 2000-2001.                                                                                | X | 4.3 | X | 4.3 |   | All ages | Both |
| Taiwan      | 1995, 1996, 1997, 1998, 1999, 2000, 2001, 2002, 2003, 2004, 2005                                                                                                                         | Ho Chan WS. Taiwan's healthcare report 2010. EPMA J. 2010; 1(4): 563-85.                                                                                                                                                               | X |     |   |     | X | All ages | Both |
| Tajikistan  | 1986, 1987, 1988, 1989, 1990, 1991, 1992, 1993, 1994, 1995, 1996, 1997, 1998, 1999, 2000, 2001, 2002, 2003, 2004, 2005, 2006, 2007, 2008, 2009, 2010, 2011, 2012, 2013, 2014, 2015, 2016 | World Health Organization Regional Office for Europe (WHO/Europe). European Health for All Database - Inpatient Care Discharges Per 100. Copenhagen, Denmark: World Health Organization Regional Office for Europe (WHO/Europe).       |   |     | X |     | X | All ages | Both |
| Tajikistan  | 1999, 2000, 2001, 2002, 2003, 2004, 2005, 2006, 2007, 2008, 2009, 2010, 2011,                                                                                                            | World Health Organization Regional Office for Europe (WHO/Europe). European Health for All Database - Outpatient Contacts Per Person Per Year. Copenhagen, Denmark: World Health Organization Regional Office for Europe (WHO/Europe). | X |     |   |     | X | All ages | Both |

|                     |                              |                                                                                                                                                                                                                                                         |   |     |   |     |   |          |        |
|---------------------|------------------------------|---------------------------------------------------------------------------------------------------------------------------------------------------------------------------------------------------------------------------------------------------------|---|-----|---|-----|---|----------|--------|
|                     | 2012, 2013, 2014, 2015, 2016 |                                                                                                                                                                                                                                                         |   |     |   |     |   |          |        |
| Tajikistan          | 2003                         | National State Statistical Agency (Tajikistan), World Bank. Tajikistan Living Standards Measurement Survey 2003.                                                                                                                                        |   |     | X | 52  |   | All ages | Both   |
| Tajikistan          | 2007                         | National State Statistical Agency (Tajikistan), World Bank. Tajikistan Living Standards Measurement Survey 2007.                                                                                                                                        |   |     | X | 4   |   | All ages | Both   |
| Tajikistan          | 2009                         | National State Statistical Agency (Tajikistan), World Bank. Tajikistan Living Standards Measurement Survey 2009.                                                                                                                                        | X | 4   | X | 52  |   | All ages | Both   |
| Tanzania            | 1993                         | Planning Commission (Tanzania), University of Dar es Salaam, World Bank. Tanzania Living Standards Measurement Study 1993-1994. Washington DC, United States: World Bank.                                                                               |   |     | X | 4   |   | All ages | Both   |
| Tanzania            | 1994                         | Bureau of Statistics (Tanzania), Macro International, Inc, United States Agency for International Development (USAID). Tanzania Knowledge, Attitudes, and Practices Survey 1994. Fairfax, United States: ICF International.                             | X | 52  |   |     |   | 15-50    | Female |
| Tanzania            | 2000                         | Bureau of Statistics (Tanzania), Oxford Policy Management. Tanzania Household Budget Survey 2000-2001. Dar es Salaam, Tanzania: Bureau of Statistics (Tanzania).                                                                                        | X | 4   |   |     |   | All ages | Both   |
| Tanzania            | 2004                         | University of Dar es Salaam, World Bank. Tanzania - Kagera Living Standards Measurement Study 2004.                                                                                                                                                     | X | 4   |   |     |   | All ages | Both   |
| Tanzania            | 2005                         | Economic Development Initiatives (EDI), World Bank (WB). Tanzania Core Welfare Indicators Questionnaire Survey 2005. Bukoba, Tanzania: Economic Development Initiatives (EDI).                                                                          | X | 4   |   |     |   | All ages | Both   |
| Tanzania            | 2006                         | Economic Development Initiatives (EDI), World Bank (WB). Tanzania Core Welfare Indicators Questionnaire Survey 2006-2007. Bukoba, Tanzania: Economic Development Initiatives (EDI).                                                                     | X | 4.3 |   |     |   | All ages | Both   |
| Tanzania            | 2007                         | National Bureau of Statistics (Tanzania). Tanzania Household Budget Survey 2007. Dar es Salaam, Tanzania: National Bureau of Statistics (Tanzania).                                                                                                     | X | 4   |   |     |   | All ages | Both   |
| Tanzania            | 2010, 2011                   | National Bureau of Statistics (Tanzania). Tanzania Living Standards Measurement Study - Integrated Surveys on Agriculture 2010-2011. Dar es Salaam, Tanzania: National Bureau of Statistics (Tanzania).                                                 | X | 4   |   |     |   | All ages | Both   |
| Thailand            | 2000                         | Mahidol University, World Health Organization (WHO). Thailand WHO Multi-country Survey Study on Health and Health System Responsiveness 2000-2001. Geneva, Switzerland: World Health Organization (WHO).                                                | X | 4.3 | X | 4.3 |   | 15-90    | Both   |
| Thailand            | 2004                         | Ministry of Public Health (Thailand). Thailand National Health and Examination Survey 2003-2004.                                                                                                                                                        | X | 4.3 | X | 52  |   | All ages | Both   |
| Thailand            | 2007                         | Ministry of Public Health (Thailand). Thailand Noncommunicable Disease and Injury Behavior Risk Surveillance Survey 2007.                                                                                                                               | X | 52  |   |     |   | 15-74    | Both   |
| The Bahamas         | 2001                         | Bahamas Department of Statistics, Ministry of Health (The Bahamas). Bahamas Living Conditions Survey 2001. Nassau, The Bahamas: Bahamas Department of Statistics.                                                                                       | X | 4   | X | 52  |   | All ages | Both   |
| The Gambia          | 1992                         | Central Statistics Department, Ministry of Finance and Economic Affairs (Gambia), Carl Bro International. Gambia Household Economic Survey 1992-1993. Banjul, Gambia: Central Statistics Department, Ministry of Finance and Economic Affairs (Gambia). | X | 2   |   |     |   | All ages | Both   |
| The Gambia          | 1992                         | Central Statistics Department (Gambia), Department of State for Finance and Economic Affairs (Gambia). Gambia Social Dimensions of Adjustment Priority Survey I 1992.                                                                                   | X | 2   |   |     |   | All ages | Both   |
| The Gambia          | 1993                         | Central Statistics Department (Gambia). Gambia Household Education and Health Survey 1993-1994. Banjul, The Gambia: Central Statistics Department (Gambia).                                                                                             | X | 2   |   |     |   | All ages | Both   |
| Timor-Leste         | 2001                         | National Statistics Directorate (Timor-Leste), World Bank. Timor-Leste Living Standards and Measurement Survey 2001. Washington DC, United States: World Bank.                                                                                          | X | 4.3 | X | 4.3 |   | All ages | Both   |
| Timor-Leste         | 2007                         | National Statistics Directorate (Timor-Leste), World Bank. Timor-Leste Living Standards and Measurement Survey 2007-2008. Washington DC, United States: World Bank.                                                                                     | X | 4   | X | 52  |   | All ages | Both   |
| Trinidad and Tobago | 2000                         | University of the West Indies, World Health Organization (WHO). Trinidad and Tobago WHO Multi-country Survey Study on Health and Health System Responsiveness 2000-2001. Geneva, Switzerland: World Health Organization (WHO).                          | X | 4.3 | X | 4.3 |   | 0-95     | Both   |
| Tunisia             | 2003                         | World Health Organization (WHO). Tunisia World Health Survey 2003. Geneva, Switzerland: World Health Organization (WHO), 2005.                                                                                                                          |   |     | X | 52  |   | 15-100+  | Both   |
| Turkey              | 1980                         | General Directorate of Curative Services, Ministry of Health (Turkey). Turkey Inpatient care discharges per 100 1980.                                                                                                                                   |   |     | X |     | X | All ages | Both   |
| Turkey              | 1981                         | General Directorate of Curative Services, Ministry of Health (Turkey). Turkey Inpatient care discharges per 100 1981.                                                                                                                                   |   |     | X |     | X | All ages | Both   |
| Turkey              | 1982                         | General Directorate of Curative Services, Ministry of Health (Turkey). Turkey Inpatient care discharges per 100 1982.                                                                                                                                   |   |     | X |     | X | All ages | Both   |
| Turkey              | 1983                         | General Directorate of Curative Services, Ministry of Health (Turkey). Turkey Inpatient care discharges per 100 1983.                                                                                                                                   |   |     | X |     | X | All ages | Both   |

|        |                                                                                          |                                                                                                                                                                                                                          |   |     |   |     |   |          |      |
|--------|------------------------------------------------------------------------------------------|--------------------------------------------------------------------------------------------------------------------------------------------------------------------------------------------------------------------------|---|-----|---|-----|---|----------|------|
| Turkey | 1984                                                                                     | General Directorate of Curative Services, Ministry of Health (Turkey). Turkey Inpatient care discharges per 100 1984.                                                                                                    |   |     | X |     | X | All ages | Both |
| Turkey | 1985                                                                                     | General Directorate of Curative Services, Ministry of Health (Turkey). Turkey Inpatient care discharges per 100 1985.                                                                                                    |   |     | X |     | X | All ages | Both |
| Turkey | 1986                                                                                     | General Directorate of Curative Services, Ministry of Health (Turkey). Turkey Inpatient care discharges per 100 1986.                                                                                                    |   |     | X |     | X | All ages | Both |
| Turkey | 1987                                                                                     | General Directorate of Curative Services, Ministry of Health (Turkey). Turkey Inpatient care discharges per 100 1987.                                                                                                    |   |     | X |     | X | All ages | Both |
| Turkey | 1988                                                                                     | General Directorate of Curative Services, Ministry of Health (Turkey). Turkey Inpatient care discharges per 100 1988.                                                                                                    |   |     | X |     | X | All ages | Both |
| Turkey | 1989                                                                                     | General Directorate of Curative Services, Ministry of Health (Turkey). Turkey Inpatient care discharges per 100 1989.                                                                                                    |   |     | X |     | X | All ages | Both |
| Turkey | 1990                                                                                     | General Directorate of Curative Services, Ministry of Health (Turkey). Turkey Inpatient care discharges per 100 1990.                                                                                                    |   |     | X |     | X | All ages | Both |
| Turkey | 1991                                                                                     | General Directorate of Curative Services, Ministry of Health (Turkey). Turkey Inpatient care discharges per 100 1991.                                                                                                    |   |     | X |     | X | All ages | Both |
| Turkey | 1992                                                                                     | General Directorate of Curative Services, Ministry of Health (Turkey). Turkey Inpatient care discharges per 100 1992.                                                                                                    |   |     | X |     | X | All ages | Both |
| Turkey | 1993                                                                                     | General Directorate of Curative Services, Ministry of Health (Turkey). Turkey Inpatient care discharges per 100 1993.                                                                                                    |   |     | X |     | X | All ages | Both |
| Turkey | 1994                                                                                     | General Directorate of Curative Services, Ministry of Health (Turkey). Turkey Inpatient care discharges per 100 1994.                                                                                                    |   |     | X |     | X | All ages | Both |
| Turkey | 1995                                                                                     | General Directorate of Curative Services, Ministry of Health (Turkey). Turkey Inpatient care discharges per 100 1995.                                                                                                    |   |     | X |     | X | All ages | Both |
| Turkey | 1996                                                                                     | General Directorate of Curative Services, Ministry of Health (Turkey). Turkey Inpatient care discharges per 100 1996.                                                                                                    |   |     | X |     | X | All ages | Both |
| Turkey | 1997                                                                                     | General Directorate of Curative Services, Ministry of Health (Turkey). Turkey Inpatient care discharges per 100 1997.                                                                                                    |   |     | X |     | X | All ages | Both |
| Turkey | 1998                                                                                     | General Directorate of Curative Services, Ministry of Health (Turkey). Turkey Inpatient care discharges per 100 1998.                                                                                                    |   |     | X |     | X | All ages | Both |
| Turkey | 1999                                                                                     | General Directorate of Curative Services, Ministry of Health (Turkey). Turkey Inpatient care discharges per 100 1999.                                                                                                    |   |     | X |     | X | All ages | Both |
| Turkey | 2000                                                                                     | AMATEM (Turkey), Plaza Ltd. Research, World Health Organization (WHO). Turkey WHO Multi-country Survey Study on Health and Health System Responsiveness 2000-2001. Geneva, Switzerland: World Health Organization (WHO). | X | 4.3 | X | 4.3 |   | 0-95     | Both |
| Turkey | 2000                                                                                     | General Directorate of Curative Services, Ministry of Health (Turkey). Turkey Inpatient care discharges per 100 2000.                                                                                                    |   |     | X |     | X | All ages | Both |
| Turkey | 2001, 2002, 2003, 2004, 2005, 2006, 2007, 2008, 2009, 2010, 2011, 2012, 2013, 2014, 2015 | Organization for Economic Co-operation and Development (OECD). OECD Health Statistics. Paris, France: Organization for Economic Co-operation and Development (OECD).                                                     | X |     |   |     | X | All ages | Both |
| Turkey | 2001                                                                                     | General Directorate of Curative Services, Ministry of Health (Turkey). Turkey Inpatient care discharges per 100 2001.                                                                                                    |   |     | X |     | X | All ages | Both |
| Turkey | 2002                                                                                     | General Directorate of Curative Services, Ministry of Health (Turkey). Turkey Inpatient care discharges per 100 2002.                                                                                                    |   |     | X |     | X | All ages | Both |
| Turkey | 2003                                                                                     | General Directorate of Curative Services, Ministry of Health (Turkey). Turkey Inpatient care discharges per 100 2003.                                                                                                    |   |     | X |     | X | All ages | Both |
| Turkey | 2004                                                                                     | General Directorate of Curative Services, Ministry of Health (Turkey). Turkey Inpatient care discharges per 100 2004.                                                                                                    |   |     | X |     | X | All ages | Both |
| Turkey | 2005                                                                                     | General Directorate of Curative Services, Ministry of Health (Turkey). Turkey Inpatient care discharges per 100 2005.                                                                                                    |   |     | X |     | X | All ages | Both |
| Turkey | 2006                                                                                     | General Directorate of Curative Services, Ministry of Health (Turkey). Turkey Inpatient care discharges per 100 2006.                                                                                                    |   |     | X |     | X | All ages | Both |
| Turkey | 2007                                                                                     | General Directorate of Curative Services, Ministry of Health (Turkey). Turkey Hospital Inpatient Discharges 2007.                                                                                                        |   |     | X |     | X | All ages | Both |
| Turkey | 2008                                                                                     | Turkish Statistical Institute. Turkey Health Interview Survey 2008. Ankara, Turkey: Turkish Statistical Institute.                                                                                                       | X | 52  |   |     |   | 0-80     | Both |
| Turkey | 2008                                                                                     | General Directorate of Curative Services, Ministry of Health (Turkey). Turkey Hospital Inpatient Discharges 2008.                                                                                                        |   |     | X |     | X | All ages | Both |
| Turkey | 2009                                                                                     | General Directorate of Curative Services, Ministry of Health (Turkey). Turkey Hospital Inpatient Discharges 2009.                                                                                                        |   |     | X |     | X | All ages | Both |
| Turkey | 2010                                                                                     | Turkish Statistical Institute. Turkey Health Interview Survey 2010. Ankara, Turkey: Turkish Statistical Institute.                                                                                                       | X | 52  | X | 52  |   | 15-80    | Both |
| Turkey | 2010                                                                                     | General Directorate of Curative Services, Ministry of Health (Turkey). Turkey Hospital Inpatient Discharges 2010.                                                                                                        |   |     | X |     | X | All ages | Both |
| Turkey | 2011                                                                                     | ISSP Research Group (2009): International Social Survey Programme: Health and Health Care - ISSP 2011. GESIS Data Archive, Cologne. ZA5800 Data file version 3.0.0, doi:10.4232/1.12252.                                 | X | 52  |   |     |   | 0-95     | Both |
| Turkey | 2011                                                                                     | General Directorate of Curative Services, Ministry of Health (Turkey). Turkey Hospital Inpatient Discharges 2011.                                                                                                        |   |     | X |     | X | All ages | Both |
| Turkey | 2012                                                                                     | General Directorate of Curative Services, Ministry of Health (Turkey). Turkey Inpatient care discharges per 100 2012.                                                                                                    |   |     | X |     | X | All ages | Both |

|              |                        |                                                                                                                                                                                                                                                                                                                   |   |     |   |   |          |      |
|--------------|------------------------|-------------------------------------------------------------------------------------------------------------------------------------------------------------------------------------------------------------------------------------------------------------------------------------------------------------------|---|-----|---|---|----------|------|
| Turkey       | 2013                   | General Directorate of Curative Services, Ministry of Health (Turkey). Turkey Inpatient care discharges per 100 2013.                                                                                                                                                                                             |   |     | X | X | All ages | Both |
| Turkey       | 2014                   | General Directorate of Curative Services, Ministry of Health (Turkey). Turkey Inpatient care discharges per 100 2014.                                                                                                                                                                                             |   |     | X | X | All ages | Both |
| Turkmenistan | 2000                   | Ministry of Health and Medical Industry (Turkmenistan). Turkmenistan Outpatient Contacts Per Person Per Year 2000.                                                                                                                                                                                                | X |     |   | X | All ages | Both |
| Turkmenistan | 2001                   | Ministry of Health and Medical Industry (Turkmenistan). Turkmenistan Outpatient Contacts Per Person Per Year 2001.                                                                                                                                                                                                | X |     |   | X | All ages | Both |
| Turkmenistan | 2002                   | Ministry of Health and Medical Industry (Turkmenistan). Turkmenistan Outpatient Contacts Per Person Per Year 2002.                                                                                                                                                                                                | X |     |   | X | All ages | Both |
| Turkmenistan | 2003                   | Ministry of Health and Medical Industry (Turkmenistan). Turkmenistan Outpatient Contacts Per Person Per Year 2003.                                                                                                                                                                                                | X |     |   | X | All ages | Both |
| Turkmenistan | 2004                   | Ministry of Health and Medical Industry (Turkmenistan). Turkmenistan Outpatient Contacts Per Person Per Year 2004.                                                                                                                                                                                                | X |     |   | X | All ages | Both |
| Turkmenistan | 2005                   | Ministry of Health and Medical Industry (Turkmenistan). Turkmenistan Outpatient Contacts Per Person Per Year 2005.                                                                                                                                                                                                | X |     |   | X | All ages | Both |
| Turkmenistan | 2006                   | Ministry of Health and Medical Industry (Turkmenistan). Turkmenistan Outpatient Contacts Per Person Per Year 2006.                                                                                                                                                                                                | X |     |   | X | All ages | Both |
| Turkmenistan | 2007                   | Ministry of Health and Medical Industry (Turkmenistan). Turkmenistan Outpatient Contacts Per Person Per Year 2007.                                                                                                                                                                                                | X |     |   | X | All ages | Both |
| Turkmenistan | 2008                   | Ministry of Health and Medical Industry (Turkmenistan). Turkmenistan Outpatient Contacts Per Person Per Year 2008.                                                                                                                                                                                                | X |     |   | X | All ages | Both |
| Turkmenistan | 2009                   | Ministry of Health and Medical Industry (Turkmenistan). Turkmenistan Outpatient Contacts Per Person Per Year 2009.                                                                                                                                                                                                | X |     |   | X | All ages | Both |
| Turkmenistan | 2010                   | Ministry of Health and Medical Industry (Turkmenistan). Turkmenistan Outpatient Contacts Per Person Per Year 2010.                                                                                                                                                                                                | X |     |   | X | All ages | Both |
| Turkmenistan | 2011                   | Ministry of Health and Medical Industry (Turkmenistan). Turkmenistan Outpatient Contacts Per Person Per Year 2011.                                                                                                                                                                                                | X |     |   | X | All ages | Both |
| Turkmenistan | 2012                   | Ministry of Health and Medical Industry (Turkmenistan). Turkmenistan Outpatient Contacts Per Person Per Year 2012.                                                                                                                                                                                                | X |     |   | X | All ages | Both |
| Turkmenistan | 2013                   | Ministry of Health and Medical Industry (Turkmenistan). Turkmenistan Outpatient Contacts Per Person Per Year 2013.                                                                                                                                                                                                | X |     |   | X | All ages | Both |
| Turkmenistan | 2014                   | Ministry of Health and Medical Industry (Turkmenistan). Turkmenistan Outpatient Contacts Per Person Per Year 2014.                                                                                                                                                                                                | X |     |   | X | All ages | Both |
| Turkmenistan | 2015                   | Ministry of Health and Medical Industry (Turkmenistan). Turkmenistan Outpatient Contacts Per Person Per Year 2015.                                                                                                                                                                                                | X |     |   | X | All ages | Both |
| Uganda       | 2002                   | Economic Policy Research Centre (Uganda), Uganda Bureau of Statistics. Uganda Household Survey 2002-2003.                                                                                                                                                                                                         | X | 8.6 |   |   | All ages | Both |
| Uganda       | 2009                   | Uganda Bureau of Statistics. Uganda Living Standards Measurement Survey - Integrated Survey on Agriculture 2009-2010. Washington DC, United States: World Bank.                                                                                                                                                   | X | 8.6 |   |   | 0-70     | Both |
| Uganda       | 2009, 2010, 2011, 2012 | Infectious Diseases Research Collaboration (IDRC), Institute for Health Metrics and Evaluation (IHME), Makerere University, Ministry of Health (Uganda). Access, Bottlenecks, Costs, and Equity (ABCE) project in Uganda, 2012. Seattle, United States: Institute for Health Metrics and Evaluation (IHME), 2015. |   |     | X | X | All ages | Both |
| Uganda       | 2012                   | Uganda Bureau of Statistics. Uganda National Household Survey 2012-2013. Kampala, Uganda: Uganda Bureau of Statistics.                                                                                                                                                                                            | X | 8.6 |   |   | All ages | Both |
| Ukraine      | 1980                   | Centre of Health Statistics, Ministry of Health (Ukraine). Ukraine Inpatient Care Discharges per 100 1980.                                                                                                                                                                                                        |   |     | X | X | All ages | Both |
| Ukraine      | 1981                   | Centre of Health Statistics, Ministry of Health (Ukraine). Ukraine Inpatient Care Discharges per 100 1981.                                                                                                                                                                                                        |   |     | X | X | All ages | Both |
| Ukraine      | 1982                   | Centre of Health Statistics, Ministry of Health (Ukraine). Ukraine Inpatient Care Discharges per 100 1982.                                                                                                                                                                                                        |   |     | X | X | All ages | Both |
| Ukraine      | 1983                   | Centre of Health Statistics, Ministry of Health (Ukraine). Ukraine Inpatient Care Discharges per 100 1983.                                                                                                                                                                                                        |   |     | X | X | All ages | Both |
| Ukraine      | 1984                   | Centre of Health Statistics, Ministry of Health (Ukraine). Ukraine Inpatient Care Discharges per 100 1984.                                                                                                                                                                                                        |   |     | X | X | All ages | Both |
| Ukraine      | 1985                   | Centre of Health Statistics, Ministry of Health (Ukraine). Ukraine Inpatient Care Discharges per 100 1985.                                                                                                                                                                                                        |   |     | X | X | All ages | Both |
| Ukraine      | 1986                   | Centre of Health Statistics, Ministry of Health (Ukraine). Ukraine Inpatient Care Discharges per 100 1986.                                                                                                                                                                                                        |   |     | X | X | All ages | Both |
| Ukraine      | 1987                   | Centre of Health Statistics, Ministry of Health (Ukraine). Ukraine Inpatient Care Discharges per 100 1987.                                                                                                                                                                                                        |   |     | X | X | All ages | Both |
| Ukraine      | 1988                   | Centre of Health Statistics, Ministry of Health (Ukraine). Ukraine Inpatient Care Discharges per 100 1988.                                                                                                                                                                                                        |   |     | X | X | All ages | Both |
| Ukraine      | 1989                   | Centre of Health Statistics, Ministry of Health (Ukraine). Ukraine Inpatient Care Discharges per 100 1989.                                                                                                                                                                                                        |   |     | X | X | All ages | Both |
| Ukraine      | 1990                   | Centre of Health Statistics, Ministry of Health (Ukraine). Ukraine Inpatient Care Discharges per 100 1990.                                                                                                                                                                                                        |   |     | X | X | All ages | Both |
| Ukraine      | 1991                   | Centre of Health Statistics, Ministry of Health (Ukraine). Ukraine Inpatient Care Discharges per 100 1991.                                                                                                                                                                                                        |   |     | X | X | All ages | Both |
| Ukraine      | 1992                   | Centre of Health Statistics, Ministry of Health (Ukraine). Ukraine Inpatient Care Discharges per 100 1992.                                                                                                                                                                                                        |   |     | X | X | All ages | Both |
| Ukraine      | 1993                   | Centre of Health Statistics, Ministry of Health (Ukraine). Ukraine Inpatient Care Discharges per 100 1993.                                                                                                                                                                                                        |   |     | X | X | All ages | Both |
| Ukraine      | 1994                   | Centre of Health Statistics, Ministry of Health (Ukraine). Ukraine Inpatient Care Discharges per 100 1994.                                                                                                                                                                                                        |   |     | X | X | All ages | Both |
| Ukraine      | 1995                   | Centre of Health Statistics, Ministry of Health (Ukraine). Ukraine Inpatient Care Discharges per 100 1995.                                                                                                                                                                                                        |   |     | X | X | All ages | Both |
| Ukraine      | 1996                   | Kiev International Institute of Sociology, World Bank. Ukraine Household Income and Expenditures Survey 1996.                                                                                                                                                                                                     | X | 4.3 |   |   | 10-95    | Both |

|                      |      |                                                                                                                                                                                                                                                                                                                 |   |     |   |     |   |          |      |
|----------------------|------|-----------------------------------------------------------------------------------------------------------------------------------------------------------------------------------------------------------------------------------------------------------------------------------------------------------------|---|-----|---|-----|---|----------|------|
| Ukraine              | 1996 | Centre of Health Statistics, Ministry of Health (Ukraine). Ukraine Inpatient Care Discharges per 100 1996.                                                                                                                                                                                                      |   |     | X |     | X | All ages | Both |
| Ukraine              | 1997 | Centre of Health Statistics, Ministry of Health (Ukraine). Ukraine Inpatient Care Discharges per 100 1997.                                                                                                                                                                                                      |   |     | X |     | X | All ages | Both |
| Ukraine              | 1998 | Centre of Health Statistics, Ministry of Health (Ukraine). Ukraine Inpatient Care Discharges per 100 1998.                                                                                                                                                                                                      |   |     | X |     | X | All ages | Both |
| Ukraine              | 1999 | Centre of Health Statistics, Ministry of Health (Ukraine). Ukraine Inpatient Care Discharges per 100 1999.                                                                                                                                                                                                      |   |     | X |     | X | All ages | Both |
| Ukraine              | 2000 | Kiev International Institute of Sociology, World Health Organization (WHO). Ukraine WHO Multi-country Survey Study on Health and Health System Responsiveness 2000-2001. Geneva, Switzerland: World Health Organization (WHO).                                                                                  | X | 4.3 | X | 4.3 |   | 0-95     | Both |
| Ukraine              | 2000 | Centre of Health Statistics, Ministry of Health (Ukraine). Ukraine Inpatient Care Discharges per 100 2000.                                                                                                                                                                                                      |   |     | X |     | X | All ages | Both |
| Ukraine              | 2001 | Centre of Health Statistics, Ministry of Health (Ukraine). Ukraine Inpatient Care Discharges per 100 2001.                                                                                                                                                                                                      |   |     | X |     | X | All ages | Both |
| Ukraine              | 2002 | World Health Organization (WHO). Ukraine World Health Survey 2002-2003. Geneva, Switzerland: World Health Organization (WHO), 2005.                                                                                                                                                                             |   |     | X | 52  |   | All ages | Both |
| Ukraine              | 2002 | Centre of Health Statistics, Ministry of Health (Ukraine). Ukraine Inpatient Care Discharges per 100 2002.                                                                                                                                                                                                      |   |     | X |     | X | All ages | Both |
| Ukraine              | 2003 | Centre of Health Statistics, Ministry of Health (Ukraine). Ukraine Inpatient Care Discharges per 100 2003.                                                                                                                                                                                                      |   |     | X |     | X | All ages | Both |
| Ukraine              | 2004 | Centre of Health Statistics, Ministry of Health (Ukraine). Ukraine Inpatient Care Discharges per 100 2004.                                                                                                                                                                                                      |   |     | X |     | X | All ages | Both |
| Ukraine              | 2005 | Centre of Health Statistics, Ministry of Health (Ukraine). Ukraine Inpatient Care Discharges per 100 2005.                                                                                                                                                                                                      |   |     | X |     | X | All ages | Both |
| Ukraine              | 2006 | Centre of Health Statistics, Ministry of Health (Ukraine). Ukraine Inpatient Care Discharges per 100 2006.                                                                                                                                                                                                      |   |     | X |     | X | All ages | Both |
| Ukraine              | 2007 | Centre of Health Statistics, Ministry of Health (Ukraine). Ukraine Inpatient Care Discharges per 100 2007.                                                                                                                                                                                                      |   |     | X |     | X | All ages | Both |
| Ukraine              | 2008 | Centre of Health Statistics, Ministry of Health (Ukraine). Ukraine Inpatient Care Discharges per 100 2008.                                                                                                                                                                                                      |   |     | X |     | X | All ages | Both |
| Ukraine              | 2009 | Centre of Health Statistics, Ministry of Health (Ukraine). Ukraine Inpatient Care Discharges per 100 2009.                                                                                                                                                                                                      |   |     | X |     | X | All ages | Both |
| Ukraine              | 2010 | Concluzia-Prim Center for Survey Methodology (Moldova), East-Ukrainian Foundation For Social Research, Institute for Advanced Studies (Austria), London School of Hygiene and Tropical Medicine, University of Aberdeen. Ukraine Health in Times of Transition Household Survey 2010.                           |   |     | X | 52  |   | 15-90    | Both |
| Ukraine              | 2010 | Centre of Health Statistics, Ministry of Health (Ukraine). Ukraine Inpatient Care Discharges per 100 2010.                                                                                                                                                                                                      |   |     | X |     | X | All ages | Both |
| Ukraine              | 2011 | Centre of Health Statistics, Ministry of Health (Ukraine). Ukraine Inpatient Care Discharges per 100 2011.                                                                                                                                                                                                      |   |     | X |     | X | All ages | Both |
| Ukraine              | 2012 | Centre of Health Statistics, Ministry of Health (Ukraine). Ukraine Inpatient Care Discharges per 100 2012.                                                                                                                                                                                                      |   |     | X |     | X | All ages | Both |
| Ukraine              | 2013 | Centre of Health Statistics, Ministry of Health (Ukraine). Ukraine Inpatient Care Discharges per 100 2013.                                                                                                                                                                                                      |   |     | X |     | X | All ages | Both |
| United Arab Emirates | 1995 | Health Ministers' Council for GCC States, Ministry of Health (United Arab Emirates). United Arab Emirates Family Health Survey 1995.                                                                                                                                                                            | X | 2   |   |     |   | All ages | Both |
| United Arab Emirates | 2000 | Gallup Europe, World Health Organization (WHO). United Arab Emirates WHO Multi-country Survey Study on Health and Health System Responsiveness 2000-2001. Geneva, Switzerland: World Health Organization (WHO).                                                                                                 | X | 4.3 | X | 4.3 |   | 15-80    | Both |
| United Arab Emirates | 2003 | World Health Organization (WHO). United Arab Emirates World Health Survey 2003. Geneva, Switzerland: World Health Organization (WHO), 2005.                                                                                                                                                                     |   |     | X | 52  |   | 15-95    | Both |
| United States        | 1979 | National Center for Health Statistics (NCHS), Centers for Disease Control and Prevention (CDC), United States Census Bureau. United States National Hospital Discharge Survey 1979. Hyattsville, United States: National Center for Health Statistics (NCHS), Centers for Disease Control and Prevention (CDC). |   |     | X |     | X | 0-99     | Both |
| United States        | 1980 | National Center for Health Statistics (NCHS), Centers for Disease Control and Prevention (CDC), United States Census Bureau. United States National Hospital Discharge Survey 1980. Hyattsville, United States: National Center for Health Statistics (NCHS), Centers for Disease Control and Prevention (CDC). |   |     | X |     | X | 0-99     | Both |
| United States        | 1981 | National Center for Health Statistics (NCHS), Centers for Disease Control and Prevention (CDC), United States Census Bureau. United States National Hospital Discharge Survey 1981. Hyattsville, United States: National Center for Health Statistics (NCHS), Centers for Disease Control and Prevention (CDC). |   |     | X |     | X | 0-99     | Both |
| United States        | 1982 | National Center for Health Statistics (NCHS), Centers for Disease Control and Prevention (CDC), United States Census Bureau. United States National Hospital Discharge Survey 1982. Hyattsville, United States: National Center for Health Statistics (NCHS), Centers for Disease Control and Prevention (CDC). |   |     | X |     | X | 0-99     | Both |
| United States        | 1983 | National Center for Health Statistics (NCHS), Centers for Disease Control and Prevention (CDC), United States Census Bureau. United States National Hospital Discharge Survey 1983. Hyattsville, United States: National Center for Health Statistics (NCHS), Centers for Disease Control and Prevention (CDC). |   |     | X |     | X | 0-99     | Both |
| United States        | 1984 | National Center for Health Statistics (NCHS), Centers for Disease Control and Prevention (CDC), United States Census Bureau. United States National Hospital Discharge Survey 1984. Hyattsville, United States: National Center for Health Statistics (NCHS), Centers for Disease Control and Prevention (CDC). |   |     | X |     | X | 0-99     | Both |



|               |      |                                                                                                                                                                                                                                                                                                                                                                                                                                                    |   |    |   |    |   |          |      |
|---------------|------|----------------------------------------------------------------------------------------------------------------------------------------------------------------------------------------------------------------------------------------------------------------------------------------------------------------------------------------------------------------------------------------------------------------------------------------------------|---|----|---|----|---|----------|------|
| United States | 1985 | National Center for Health Statistics (NCHS), Centers for Disease Control and Prevention (CDC), United States Census Bureau. United States National Hospital Discharge Survey 1985. Hyattsville, United States: National Center for Health Statistics (NCHS), Centers for Disease Control and Prevention (CDC).                                                                                                                                    |   |    | X |    | X | 0-99     | Both |
| United States | 1986 | National Center for Health Statistics (NCHS), Centers for Disease Control and Prevention (CDC), United States Census Bureau. United States National Hospital Discharge Survey 1986. Hyattsville, United States: National Center for Health Statistics (NCHS), Centers for Disease Control and Prevention (CDC).                                                                                                                                    |   |    | X |    | X | 0-99     | Both |
| United States | 1987 | National Center for Health Statistics (NCHS), Centers for Disease Control and Prevention (CDC), United States Census Bureau. United States National Hospital Discharge Survey 1987. Hyattsville, United States: National Center for Health Statistics (NCHS), Centers for Disease Control and Prevention (CDC).                                                                                                                                    |   |    | X |    | X | 0-99     | Both |
| United States | 1988 | National Center for Health Statistics (NCHS), Centers for Disease Control and Prevention (CDC). United States National Health and Nutrition Examination Survey 1988-1994. Hyattsville, United States: National Center for Health Statistics (NCHS), Centers for Disease Control and Prevention (CDC).                                                                                                                                              | X | 52 | X | 52 |   | 15-95    | Both |
| United States | 1988 | National Center for Health Statistics (NCHS), Centers for Disease Control and Prevention (CDC), United States Census Bureau. United States National Hospital Discharge Survey 1988. Hyattsville, United States: National Center for Health Statistics (NCHS), Centers for Disease Control and Prevention (CDC).                                                                                                                                    |   |    | X |    | X | 0-99     | Both |
| United States | 1989 | National Center for Health Statistics (NCHS), Centers for Disease Control and Prevention (CDC), United States Census Bureau. United States National Hospital Discharge Survey 1989. Hyattsville, United States: National Center for Health Statistics (NCHS), Centers for Disease Control and Prevention (CDC).                                                                                                                                    |   |    | X |    | X | 0-99     | Both |
| United States | 1990 | United States Department of Health and Human Services. Centers for Disease Control and Prevention. National Center for Health Statistics. National Health Interview Survey, 1994: Second Longitudinal Study on Aging, Wave 2, 1997. ICPSR03526-v2. Ann Arbor, MI: Inter-university Consortium for Political and Social Research [distributor], 2007-03-01. <a href="http://doi.org/10.3886/ICPSR03526.v2">http://doi.org/10.3886/ICPSR03526.v2</a> | X | 52 | X | 52 |   | 70-100+  | Both |
| United States | 1990 | National Center for Health Statistics (NCHS), Centers for Disease Control and Prevention (CDC), US Census Bureau. United States National Health Interview Survey 1990. Hyattsville, United States: National Center for Health Statistics (NCHS), Centers for Disease Control and Prevention (CDC).                                                                                                                                                 | X | 52 | X | 52 |   | All ages | Both |
| United States | 1990 | National Center for Health Statistics (NCHS), Centers for Disease Control and Prevention (CDC), United States Census Bureau. United States National Hospital Discharge Survey 1990. Hyattsville, United States: National Center for Health Statistics (NCHS), Centers for Disease Control and Prevention (CDC).                                                                                                                                    |   |    | X |    | X | 0-99     | Both |
| United States | 1991 | National Center for Health Statistics (NCHS), Centers for Disease Control and Prevention (CDC), US Census Bureau. United States National Health Interview Survey 1991. Hyattsville, United States: National Center for Health Statistics (NCHS), Centers for Disease Control and Prevention (CDC).                                                                                                                                                 | X | 2  | X | 52 |   | All ages | Both |
| United States | 1991 | National Center for Health Statistics (NCHS), Centers for Disease Control and Prevention (CDC), United States Census Bureau. United States National Hospital Discharge Survey 1991. Hyattsville, United States: National Center for Health Statistics (NCHS), Centers for Disease Control and Prevention (CDC).                                                                                                                                    |   |    | X |    | X | 0-99     | Both |
| United States | 1992 | National Center for Health Statistics (NCHS), Centers for Disease Control and Prevention (CDC), US Census Bureau. United States National Health Interview Survey 1992. Hyattsville, United States: National Center for Health Statistics (NCHS), Centers for Disease Control and Prevention (CDC).                                                                                                                                                 | X | 2  | X | 52 |   | All ages | Both |
| United States | 1992 | National Center for Health Statistics (NCHS), Centers for Disease Control and Prevention (CDC), United States Census Bureau. United States National Hospital Discharge Survey 1992. Hyattsville, United States: National Center for Health Statistics (NCHS), Centers for Disease Control and Prevention (CDC).                                                                                                                                    |   |    | X |    | X | 0-99     | Both |
| United States | 1993 | National Center for Health Statistics (NCHS), Centers for Disease Control and Prevention (CDC), US Census Bureau. United States National Health Interview Survey 1993. Hyattsville, United States: National Center for Health Statistics (NCHS), Centers for Disease Control and Prevention (CDC).                                                                                                                                                 | X | 52 | X | 52 |   | All ages | Both |
| United States | 1993 | National Center for Health Statistics (NCHS), Centers for Disease Control and Prevention (CDC), United States Census Bureau. United States National Hospital Discharge Survey 1993. Hyattsville, United States: National Center for Health Statistics (NCHS), Centers for Disease Control and Prevention (CDC).                                                                                                                                    |   |    | X |    | X | 0-99     | Both |
| United States | 1994 | National Center for Health Statistics (NCHS), Centers for Disease Control and Prevention (CDC), United States Census Bureau. United States National Hospital Discharge Survey 1994. Hyattsville, United States: National Center for Health Statistics (NCHS), Centers for Disease Control and Prevention (CDC).                                                                                                                                    |   |    | X |    | X | 0-99     | Both |
| United States | 1994 | United States Department of Health and Human Services. Centers for Disease Control and Prevention. National Center for Health Statistics. National Health Interview Survey, 1994: Second Supplement on Aging. ICPSR02563-v3. Ann Arbor, MI: Inter-university Consortium for Political and Social Research [distributor], 2007-02-12. <a href="http://doi.org/10.3886/ICPSR02563.v3">http://doi.org/10.3886/ICPSR02563.v3</a>                       | X | 52 | X | 26 |   | 65-100+  | Both |
| United States | 1995 | National Center for Health Statistics (NCHS), Centers for Disease Control and Prevention (CDC), United States Census Bureau. United States National Hospital Discharge Survey 1995. Hyattsville, United States: National Center for Health Statistics (NCHS), Centers for Disease Control and Prevention (CDC).                                                                                                                                    |   |    | X |    | X | 0-99     | Both |

|               |                                                                                                      |                                                                                                                                                                                                                                                                                                                 |   |     |   |     |   |          |        |
|---------------|------------------------------------------------------------------------------------------------------|-----------------------------------------------------------------------------------------------------------------------------------------------------------------------------------------------------------------------------------------------------------------------------------------------------------------|---|-----|---|-----|---|----------|--------|
| United States | 1996                                                                                                 | National Center for Health Statistics (NCHS), Centers for Disease Control and Prevention (CDC), United States Census Bureau. United States National Hospital Discharge Survey 1996. Hyattsville, United States: National Center for Health Statistics (NCHS), Centers for Disease Control and Prevention (CDC). |   |     | X |     | X | 0-99     | Both   |
| United States | 1996                                                                                                 | Louis Harris and Associates. United States Commonwealth Fund Survey of the Health of Adolescent Girls and Boys 1996-1997. New York, United States: Commonwealth Fund, 1997.                                                                                                                                     | X | 52  |   |     |   | 8-18     | Both   |
| United States | 1997, 1998, 1999, 2000, 2001, 2002, 2003, 2004, 2005, 2006, 2007, 2009, 2010, 2011, 2012, 2013, 2014 | Institute for Health Metrics and Evaluation (IHME). United States Personal Health Care and Public Health Spending 1996-2013. Seattle, United States: Institute for Health Metrics and Evaluation (IHME), 2016.                                                                                                  | X |     |   |     | X | All ages | Both   |
| United States | 1997                                                                                                 | National Center for Health Statistics (NCHS), Centers for Disease Control and Prevention (CDC), US Census Bureau. United States National Health Interview Survey 1997. Hyattsville, United States: National Center for Health Statistics (NCHS), Centers for Disease Control and Prevention (CDC).              | X | 2   | X | 52  |   | 0-90     | Both   |
| United States | 1997                                                                                                 | National Center for Health Statistics (NCHS), Centers for Disease Control and Prevention (CDC), United States Census Bureau. United States National Hospital Discharge Survey 1997. Hyattsville, United States: National Center for Health Statistics (NCHS), Centers for Disease Control and Prevention (CDC). |   |     | X |     | X | 0-99     | Both   |
| United States | 1998                                                                                                 | National Center for Health Statistics (NCHS), Centers for Disease Control and Prevention (CDC), US Census Bureau. United States National Health Interview Survey 1998. Hyattsville, United States: National Center for Health Statistics (NCHS), Centers for Disease Control and Prevention (CDC).              | X | 2   | X | 52  |   | 0-90     | Both   |
| United States | 1998                                                                                                 | National Center for Health Statistics (NCHS), Centers for Disease Control and Prevention (CDC), United States Census Bureau. United States National Hospital Discharge Survey 1998. Hyattsville, United States: National Center for Health Statistics (NCHS), Centers for Disease Control and Prevention (CDC). |   |     | X |     | X | 0-99     | Both   |
| United States | 1998                                                                                                 | Louis Harris and Associates. United States Commonwealth Fund Survey of Women's Health 1998. New York, United States: Commonwealth Fund, 1999.                                                                                                                                                                   | X | 52  |   |     |   | 18-64    | Female |
| United States | 1999                                                                                                 | National Center for Health Statistics (NCHS), Centers for Disease Control and Prevention (CDC), US Census Bureau. United States National Health Interview Survey 1999. Hyattsville, United States: National Center for Health Statistics (NCHS), Centers for Disease Control and Prevention (CDC).              | X | 2   | X | 52  |   | 0-90     | Both   |
| United States | 1999                                                                                                 | National Center for Health Statistics (NCHS), Centers for Disease Control and Prevention (CDC), United States National Health and Nutrition Examination Survey 1999-2000. Hyattsville, United States: National Center for Health Statistics (NCHS), Centers for Disease Control and Prevention (CDC).           | X | 52  | X | 52  |   | 0-90     | Both   |
| United States | 1999                                                                                                 | National Center for Health Statistics (NCHS), Centers for Disease Control and Prevention (CDC), United States Census Bureau. United States National Hospital Discharge Survey 1999. Hyattsville, United States: National Center for Health Statistics (NCHS), Centers for Disease Control and Prevention (CDC). |   |     | X |     | X | 0-99     | Both   |
| United States | 2000                                                                                                 | National Center for Health Statistics (NCHS), Centers for Disease Control and Prevention (CDC), US Census Bureau. United States National Health Interview Survey 2000. Hyattsville, United States: National Center for Health Statistics (NCHS), Centers for Disease Control and Prevention (CDC).              | X | 2   | X | 52  |   | 0-90     | Both   |
| United States | 2000                                                                                                 | National Center for Health Statistics (NCHS), Centers for Disease Control and Prevention (CDC), United States Census Bureau. United States National Hospital Discharge Survey 2000. Hyattsville, United States: National Center for Health Statistics (NCHS), Centers for Disease Control and Prevention (CDC). |   |     | X |     | X | 0-99     | Both   |
| United States | 2000                                                                                                 | Washington State University, World Health Organization (WHO). United States WHO Multi-country Survey Study on Health and Health System Responsiveness 2000-2001. Geneva, Switzerland: World Health Organization (WHO).                                                                                          | X | 4.3 | X | 4.3 |   | All ages | Both   |
| United States | 2001                                                                                                 | National Center for Health Statistics (NCHS), Centers for Disease Control and Prevention (CDC), US Census Bureau. United States National Health Interview Survey 2001. Hyattsville, United States: National Center for Health Statistics (NCHS), Centers for Disease Control and Prevention (CDC).              | X | 2   | X | 52  |   | 0-90     | Both   |
| United States | 2001                                                                                                 | National Center for Health Statistics (NCHS), Centers for Disease Control and Prevention (CDC), United States National Health and Nutrition Examination Survey 2001-2002. Hyattsville, United States: National Center for Health Statistics (NCHS), Centers for Disease Control and Prevention (CDC).           | X | 52  | X | 52  |   | 0-90     | Both   |
| United States | 2001                                                                                                 | National Center for Health Statistics (NCHS), Centers for Disease Control and Prevention (CDC), United States Census Bureau. United States National Hospital Discharge Survey 2001. Hyattsville, United States: National Center for Health Statistics (NCHS), Centers for Disease Control and Prevention (CDC). |   |     | X |     | X | 0-99     | Both   |



|               |      |                                                                                                                                                                                                                                                                                                                 |   |    |   |    |   |         |      |
|---------------|------|-----------------------------------------------------------------------------------------------------------------------------------------------------------------------------------------------------------------------------------------------------------------------------------------------------------------|---|----|---|----|---|---------|------|
| United States | 2002 | National Center for Health Statistics (NCHS), Centers for Disease Control and Prevention (CDC), US Census Bureau. United States National Health Interview Survey 2002. Hyattsville, United States: National Center for Health Statistics (NCHS), Centers for Disease Control and Prevention (CDC).              | X | 2  | X | 52 |   | 0-90    | Both |
| United States | 2002 | National Center for Health Statistics (NCHS), Centers for Disease Control and Prevention (CDC), United States Census Bureau. United States National Hospital Discharge Survey 2002. Hyattsville, United States: National Center for Health Statistics (NCHS), Centers for Disease Control and Prevention (CDC). |   |    | X |    | X | 0-99    | Both |
| United States | 2003 | National Center for Health Statistics (NCHS), Centers for Disease Control and Prevention (CDC), US Census Bureau. United States National Health Interview Survey 2003. Hyattsville, United States: National Center for Health Statistics (NCHS), Centers for Disease Control and Prevention (CDC).              | X | 2  | X | 52 |   | 0-90    | Both |
| United States | 2003 | National Center for Health Statistics (NCHS), Centers for Disease Control and Prevention (CDC). United States National Health and Nutrition Examination Survey 2003-2004. Hyattsville, United States: National Center for Health Statistics (NCHS), Centers for Disease Control and Prevention (CDC).           | X | 52 | X | 52 |   | 0-90    | Both |
| United States | 2003 | National Center for Health Statistics (NCHS), Centers for Disease Control and Prevention (CDC). United States Census Bureau. United States National Hospital Discharge Survey 2003. Hyattsville, United States: National Center for Health Statistics (NCHS), Centers for Disease Control and Prevention (CDC). |   |    | X |    | X | 0-99    | Both |
| United States | 2003 | Healthcare Cost and Utilization Project (HCUP), Agency for Healthcare Research and Quality (AHRQ). United States State Inpatient Databases 2003. Rockville, United States: Healthcare Cost and Utilization Project (HCUP), Agency for Healthcare Research and Quality (AHRQ).                                   |   |    | X |    | X | 0-99    | Both |
| United States | 2004 | National Center for Health Statistics (NCHS), Centers for Disease Control and Prevention (CDC), US Census Bureau. United States National Health Interview Survey 2004. Hyattsville, United States: National Center for Health Statistics (NCHS), Centers for Disease Control and Prevention (CDC).              | X | 2  | X | 52 |   | 0-90    | Both |
| United States | 2004 | National Center for Health Statistics (NCHS), Centers for Disease Control and Prevention (CDC), United States Census Bureau. United States National Hospital Discharge Survey 2004. Hyattsville, United States: National Center for Health Statistics (NCHS), Centers for Disease Control and Prevention (CDC). |   |    | X |    | X | 0-99    | Both |
| United States | 2004 | Healthcare Cost and Utilization Project (HCUP), Agency for Healthcare Research and Quality (AHRQ). United States State Inpatient Databases 2004. Rockville, United States: Healthcare Cost and Utilization Project (HCUP), Agency for Healthcare Research and Quality (AHRQ).                                   |   |    | X |    | X | 0-99    | Both |
| United States | 2005 | National Center for Health Statistics (NCHS), Centers for Disease Control and Prevention (CDC). United States National Health and Nutrition Examination Survey 2005-2006. Hyattsville, United States: National Center for Health Statistics (NCHS), Centers for Disease Control and Prevention (CDC), 2007.     | X | 52 | X | 52 |   | 0-90    | Both |
| United States | 2005 | Panel Study of Income Dynamics, 2005 public use dataset. Produced and distributed by the University of Michigan with primary funding from the National Science Foundation, the National Institute of Aging, and the National Institute of Child Health and Human Development. Ann Arbor, MI, (2011).            |   |    | X | 52 |   | 15-100+ | Both |
| United States | 2005 | National Center for Health Statistics (NCHS), Centers for Disease Control and Prevention (CDC), United States Census Bureau. United States National Hospital Discharge Survey 2005. Hyattsville, United States: National Center for Health Statistics (NCHS), Centers for Disease Control and Prevention (CDC). |   |    | X |    | X | 0-99    | Both |
| United States | 2005 | Healthcare Cost and Utilization Project (HCUP), Agency for Healthcare Research and Quality (AHRQ). United States State Inpatient Databases 2005. Rockville, United States: Healthcare Cost and Utilization Project (HCUP), Agency for Healthcare Research and Quality (AHRQ).                                   |   |    | X |    | X | 0-99    | Both |
| United States | 2006 | National Center for Health Statistics (NCHS), Centers for Disease Control and Prevention (CDC), US Census Bureau. United States National Health Interview Survey 2006. Hyattsville, United States: National Center for Health Statistics (NCHS), Centers for Disease Control and Prevention (CDC).              | X | 2  | X | 52 |   | 0-90    | Both |
| United States | 2006 | National Center for Health Statistics (NCHS), Centers for Disease Control and Prevention (CDC), United States Census Bureau. United States National Hospital Discharge Survey 2006. Hyattsville, United States: National Center for Health Statistics (NCHS), Centers for Disease Control and Prevention (CDC). |   |    | X |    | X | 0-99    | Both |
| United States | 2006 | Healthcare Cost and Utilization Project (HCUP), Agency for Healthcare Research and Quality (AHRQ). United States State Inpatient Databases 2006. Rockville, United States: Healthcare Cost and Utilization Project (HCUP), Agency for Healthcare Research and Quality (AHRQ).                                   |   |    | X |    | X | 0-99    | Both |
| United States | 2007 | National Center for Health Statistics (NCHS), Centers for Disease Control and Prevention (CDC). United States National Health and Nutrition Examination Survey 2007-2008. Hyattsville, United States: National Center for Health Statistics (NCHS), Centers for Disease Control and Prevention (CDC), 2009.     | X | 52 | X | 52 |   | 0-85    | Both |
| United States | 2007 | National Center for Health Statistics (NCHS), Centers for Disease Control and Prevention (CDC), US Census Bureau. United States National Health Interview Survey 2007. Hyattsville, United States: National Center for Health Statistics (NCHS), Centers for Disease Control and Prevention (CDC).              | X | 2  | X | 52 |   | 0-90    | Both |

|               |      |                                                                                                                                                                                                                                                                                                                     |   |    |   |    |   |          |      |
|---------------|------|---------------------------------------------------------------------------------------------------------------------------------------------------------------------------------------------------------------------------------------------------------------------------------------------------------------------|---|----|---|----|---|----------|------|
| United States | 2007 | Panel Study of Income Dynamics, 2007 public use dataset. Produced and distributed by the University of Michigan with primary funding from the National Science Foundation, the National Institute of Aging, and the National Institute of Child Health and Human Development. Ann Arbor, MI, (2011).                |   |    | X | 52 |   | All ages | Both |
| United States | 2007 | National Center for Health Statistics (NCHS), Centers for Disease Control and Prevention (CDC), United States Census Bureau. United States National Hospital Discharge Survey 2007. Hyattsville, United States: National Center for Health Statistics (NCHS), Centers for Disease Control and Prevention (CDC).     |   |    | X |    | X | 0-99     | Both |
| United States | 2007 | Healthcare Cost and Utilization Project (HCUP), Agency for Healthcare Research and Quality (AHRQ). United States State Inpatient Databases 2007. Rockville, United States: Healthcare Cost and Utilization Project (HCUP), Agency for Healthcare Research and Quality (AHRQ).                                       |   |    | X |    | X | 0-99     | Both |
| United States | 2008 | National Center for Health Statistics (NCHS), Centers for Disease Control and Prevention (CDC), US Census Bureau. United States National Health Interview Survey 2008. Hyattsville, United States: National Center for Health Statistics (NCHS), Centers for Disease Control and Prevention (CDC).                  | X | 2  | X | 52 |   | 0-90     | Both |
| United States | 2008 | National Center for Health Statistics (NCHS), Centers for Disease Control and Prevention (CDC), United States Census Bureau. United States National Hospital Discharge Survey 2008. Hyattsville, United States: National Center for Health Statistics (NCHS), Centers for Disease Control and Prevention (CDC).     |   |    | X |    | X | 0-94     | Both |
| United States | 2008 | Healthcare Cost and Utilization Project (HCUP), Agency for Healthcare Research and Quality (AHRQ). United States State Inpatient Databases 2008. Rockville, United States: Healthcare Cost and Utilization Project (HCUP), Agency for Healthcare Research and Quality (AHRQ).                                       |   |    | X |    | X | 0-99     | Both |
| United States | 2009 | National Center for Health Statistics (NCHS), Centers for Disease Control and Prevention (CDC), US Census Bureau. United States National Health Interview Survey 2009. Hyattsville, United States: National Center for Health Statistics (NCHS), Centers for Disease Control and Prevention (CDC).                  | X | 2  | X | 52 |   | 0-90     | Both |
| United States | 2009 | National Center for Health Statistics (NCHS), Centers for Disease Control and Prevention (CDC), United States National Health and Nutrition Examination Survey 2009-2010. Hyattsville, United States: National Center for Health Statistics (NCHS), Centers for Disease Control and Prevention (CDC), 2011.         | X | 52 | X | 52 |   | 0-85     | Both |
| United States | 2009 | National Center for Health Statistics (NCHS), Centers for Disease Control and Prevention (CDC), United States Census Bureau. United States National Hospital Discharge Survey 2009. Hyattsville, United States: National Center for Health Statistics (NCHS), Centers for Disease Control and Prevention (CDC).     |   |    | X |    | X | 0-94     | Both |
| United States | 2009 | Healthcare Cost and Utilization Project (HCUP), Agency for Healthcare Research and Quality (AHRQ). United States State Inpatient Databases 2009. Rockville, United States: Healthcare Cost and Utilization Project (HCUP), Agency for Healthcare Research and Quality (AHRQ).                                       |   |    | X |    | X | 0-99     | Both |
| United States | 2010 | National Center for Health Statistics (NCHS), Centers for Disease Control and Prevention (CDC), US Census Bureau. United States National Health Interview Survey 2010. Hyattsville, United States: National Center for Health Statistics (NCHS), Centers for Disease Control and Prevention (CDC).                  | X | 2  | X | 52 |   | 0-90     | Both |
| United States | 2010 | National Center for Health Statistics (NCHS), Centers for Disease Control and Prevention (CDC), United States Census Bureau. United States National Hospital Discharge Survey 2010. Hyattsville, United States: National Center for Health Statistics (NCHS), Centers for Disease Control and Prevention (CDC).     |   |    | X |    | X | 0-94     | Both |
| United States | 2011 | National Center for Health Statistics (NCHS), Centers for Disease Control and Prevention (CDC), US Census Bureau. United States National Health Interview Survey 2011. Hyattsville, United States: National Center for Health Statistics (NCHS), Centers for Disease Control and Prevention (CDC).                  | X | 2  | X | 52 |   | 0-90     | Both |
| United States | 2011 | National Center for Health Statistics (NCHS), Centers for Disease Control and Prevention (CDC), United States National Health and Nutrition Examination Survey 2011-2012. Hyattsville, United States: National Center for Health Statistics (NCHS), Centers for Disease Control and Prevention (CDC), 2013.         | X | 52 | X | 52 |   | 0-85     | Both |
| United States | 2011 | ISSP Research Group (2009): International Social Survey Programme: Health and Health Care - ISSP 2011. GESIS Data Archive, Cologne. ZA5800 Data file version 3.0.0, doi:10.4232/1.12252.                                                                                                                            | X | 52 |   |    |   | 0-90     | Both |
| United States | 2011 | Healthcare Cost and Utilization Project (HCUP), Agency for Healthcare Research and Quality (AHRQ). United States State Inpatient Databases 2011. Rockville, United States: Healthcare Cost and Utilization Project (HCUP), Agency for Healthcare Research and Quality (AHRQ).                                       |   |    | X |    | X | All ages | Both |
| United States | 2012 | National Center for Health Statistics (NCHS), Centers for Disease Control and Prevention (CDC), United States Census Bureau. United States National Health Interview Survey 2012. Hyattsville, United States: National Center for Health Statistics (NCHS), Centers for Disease Control and Prevention (CDC), 2013. | X | 2  | X | 52 |   | 0-90     | Both |
| United States | 2012 | Healthcare Cost and Utilization Project (HCUP), Agency for Healthcare Research and Quality (AHRQ). United States State Inpatient Databases 2012. Rockville, United States: Healthcare Cost and Utilization Project (HCUP), Agency for Healthcare Research and Quality (AHRQ).                                       |   |    | X |    | X | All ages | Both |

|               |                                                                                                                                                      |                                                                                                                                                                                                                                                                                                                     |   |   |   |    |   |          |      |
|---------------|------------------------------------------------------------------------------------------------------------------------------------------------------|---------------------------------------------------------------------------------------------------------------------------------------------------------------------------------------------------------------------------------------------------------------------------------------------------------------------|---|---|---|----|---|----------|------|
| United States | 2013                                                                                                                                                 | National Center for Health Statistics (NCHS), Centers for Disease Control and Prevention (CDC), United States Census Bureau, United States National Health Interview Survey 2013. Hyattsville, United States: National Center for Health Statistics (NCHS), Centers for Disease Control and Prevention (CDC), 2014. | X | 2 | X | 52 |   | 0-90     | Both |
| United States | 2013                                                                                                                                                 | National Center for Health Statistics (NCHS), Centers for Disease Control and Prevention (CDC), United States National Health and Nutrition Examination Survey 2013-2014. Hyattsville, United States: National Center for Health Statistics (NCHS), Centers for Disease Control and Prevention (CDC).               |   |   | X | 52 |   | 0-85     | Both |
| United States | 2013                                                                                                                                                 | Healthcare Cost and Utilization Project (HCUP), Agency for Healthcare Research and Quality (AHRQ), United States Nationwide Inpatient Sample 2013. Rockville, United States: Healthcare Cost and Utilization Project (HCUP), Agency for Healthcare Research and Quality (AHRQ).                                     |   |   | X |    | X | All ages | Both |
| United States | 2013                                                                                                                                                 | Healthcare Cost and Utilization Project (HCUP), Agency for Healthcare Research and Quality (AHRQ), United States State Inpatient Databases 2013. Rockville, United States: Healthcare Cost and Utilization Project (HCUP), Agency for Healthcare Research and Quality (AHRQ).                                       |   |   | X |    | X | All ages | Both |
| United States | 2014                                                                                                                                                 | National Center for Health Statistics (NCHS), Centers for Disease Control and Prevention (CDC), United States National Health Interview Survey 2014. Hyattsville, United States: National Center for Health Statistics (NCHS), Centers for Disease Control and Prevention (CDC), 2015.                              | X | 2 | X | 52 |   | 0-90     | Both |
| United States | 2014                                                                                                                                                 | Healthcare Cost and Utilization Project (HCUP), Agency for Healthcare Research and Quality (AHRQ), United States Nationwide Inpatient Sample 2014. Rockville, United States: Healthcare Cost and Utilization Project (HCUP), Agency for Healthcare Research and Quality (AHRQ).                                     |   |   | X |    | X | All ages | Both |
| United States | 2014                                                                                                                                                 | Healthcare Cost and Utilization Project (HCUP), Agency for Healthcare Research and Quality (AHRQ), United States State Inpatient Databases 2014. Rockville, United States: Healthcare Cost and Utilization Project (HCUP), Agency for Healthcare Research and Quality (AHRQ).                                       |   |   | X |    | X | All ages | Both |
| United States | 2015                                                                                                                                                 | Healthcare Cost and Utilization Project (HCUP), Agency for Healthcare Research and Quality (AHRQ), United States Nationwide Inpatient Sample 2015. Rockville, United States: Healthcare Cost and Utilization Project (HCUP), Agency for Healthcare Research and Quality (AHRQ).                                     |   |   | X |    | X | All ages | Both |
| Uruguay       | 2002                                                                                                                                                 | World Health Organization (WHO), Uruguay World Health Survey 2002-2003. Geneva, Switzerland: World Health Organization (WHO), 2005.                                                                                                                                                                                 |   |   | X | 52 |   | 15-95    | Both |
| Uzbekistan    | 1981, 1982, 1983, 1995, 1996, 1997, 1998, 1999, 2000, 2001, 2002, 2003, 2004, 2005, 2006, 2007, 2008, 2009, 2010, 2011, 2012, 2013, 2014, 2015, 2016 | World Health Organization Regional Office for Europe (WHO/Europe), European Health for All Database - Inpatient Care Discharges Per 100. Copenhagen, Denmark: World Health Organization Regional Office for Europe (WHO/Europe).                                                                                    |   |   | X |    | X | All ages | Both |
| Uzbekistan    | 1999, 2000, 2001, 2002, 2003, 2004, 2005, 2006, 2007, 2008, 2009, 2010, 2011, 2012, 2013, 2014, 2015, 2016                                           | World Health Organization Regional Office for Europe (WHO/Europe), European Health for All Database - Outpatient Contacts Per Person Per Year. Copenhagen, Denmark: World Health Organization Regional Office for Europe (WHO/Europe).                                                                              | X |   |   |    | X | All ages | Both |
| Uzbekistan    | 2002                                                                                                                                                 | Analytical and Information Center of the Ministry of Health of Uzbekistan, Macro International, Inc, Ministry of Macroeconomics and Statistics (Uzbekistan), Uzbekistan Special Demographic and Health Survey 2002. Calverton, United States: Macro International, Inc.                                             |   |   | X | 52 |   | 15-60    | Both |

|           |                                                      |                                                                                                                                                                                                                                                                                                                                                                                                  |   |      |   |     |   |          |      |
|-----------|------------------------------------------------------|--------------------------------------------------------------------------------------------------------------------------------------------------------------------------------------------------------------------------------------------------------------------------------------------------------------------------------------------------------------------------------------------------|---|------|---|-----|---|----------|------|
| Venezuela | 2000                                                 | Gallup Europe, World Health Organization (WHO). Venezuela WHO Multi-country Survey Study on Health and Health System Responsiveness 2000-2001. Geneva, Switzerland: World Health Organization (WHO).                                                                                                                                                                                             | X | 4.3  | X | 4.3 |   | 0-60     | Both |
| Vietnam   | 2002                                                 | World Health Organization (WHO). Vietnam World Health Survey 2002-2003. Geneva, Switzerland: World Health Organization (WHO), 2005.                                                                                                                                                                                                                                                              |   |      | X | 52  |   | All ages | Both |
| Vietnam   | 2006                                                 | General Statistics Office (Viet Nam), United Nations Development Programme (UNDP), World Bank. Vietnam Living Standards Measurement Survey 2006.                                                                                                                                                                                                                                                 | X | 52   | X | 52  |   | All ages | Both |
| Vietnam   | 2008                                                 | General Statistics Office (Viet Nam), United Nations Development Programme (UNDP), World Bank (WB). Viet Nam Living Standards Measurement Survey 2008. Ha Noi, Viet Nam: General Statistics Office (Viet Nam).                                                                                                                                                                                   | X | 52   | X | 52  |   | All ages | Both |
| Wales     | 1999, 2001, 2002, 2003, 2004, 2006, 2007, 2009, 2010 | World Health Organization Regional Office for Europe (WHO/Europe). European Hospital Morbidity Database 1999-2007. Copenhagen, Denmark: World Health Organization Regional Office for Europe (WHO/Europe).                                                                                                                                                                                       |   |      | X |     | X | All ages | Both |
| Wales     | 2006                                                 | Department of Health, Social Services and Public Safety (Northern Ireland), Information Centre for Health and Social Care, NHS, NHS England, NHS Health Scotland, NHS Wales. United Kingdom Hospital Patient and Discharge Data 2006.                                                                                                                                                            |   |      | X |     | X | All ages | Both |
| Wales     | 2012                                                 | Department of Health, Social Services and Public Safety (Northern Ireland), Information Centre for Health and Social Care, NHS, NHS England, NHS Health Scotland, NHS Wales. United Kingdom Hospital Patient and Discharge Data 2012.                                                                                                                                                            |   |      | X |     | X | All ages | Both |
| Wales     | 2013                                                 | Department of Health, Social Services and Public Safety (Northern Ireland), Information Centre for Health and Social Care, NHS, NHS England, NHS Health Scotland, NHS Wales. United Kingdom Hospital Patient and Discharge Data 2013.                                                                                                                                                            |   |      | X |     | X | All ages | Both |
| Wales     | 2014                                                 | Department of Health, Social Services and Public Safety (Northern Ireland), Information Centre for Health and Social Care, NHS, NHS England, NHS Health Scotland, NHS Wales. United Kingdom Hospital Patient and Discharge Data 2014.                                                                                                                                                            |   |      | X |     | X | All ages | Both |
| Yemen     | 2005                                                 | Central Statistical Organization (Yemen). Yemen Household Budget Survey 2005-2006. Sana'a, Yemen: Central Statistical Organization (Yemen).                                                                                                                                                                                                                                                      | X | 4.3  |   |     |   | All ages | Both |
| Yemen     | 2012                                                 | Ministry of Planning and International Cooperation (Yemen), International Policy Center for Inclusive Growth, Interaction in Development (Yemen), UNICEF Yemen. Yemen National Social Protection Monitoring Survey 2012-2013.                                                                                                                                                                    | X | 2    |   |     |   | All ages | Both |
| Zambia    | 1991                                                 | Central Bureau of Statistics (Norway), Central Statistical Office (Zambia), World Bank. Zambia Priority Survey 1991.                                                                                                                                                                                                                                                                             | X | 12.9 |   |     |   | All ages | Both |
| Zambia    | 1993                                                 | Central Bureau of Statistics (Norway), Central Statistical Office (Zambia), Zambia Priority Survey 1993.                                                                                                                                                                                                                                                                                         | X | 12.9 |   |     |   | 0-9      | Both |
| Zambia    | 1996                                                 | Central Statistical Office (Zambia). Zambia Living Conditions Monitoring Survey 1996. Lusaka, Zambia: Central Statistical Office (Zambia).                                                                                                                                                                                                                                                       | X | 4.3  |   |     |   | 0-95     | Both |
| Zambia    | 1998                                                 | Central Statistical Office (Zambia), London School of Hygiene and Tropical Medicine. Zambia Living Conditions Monitoring Survey 1998. Lusaka, Zambia: Central Statistical Office (Zambia).                                                                                                                                                                                                       | X | 2    |   |     |   | All ages | Both |
| Zambia    | 2002                                                 | Central Statistical Office (Zambia). Zambia Living Conditions Monitoring Survey 2002-2003. Lusaka, Zambia: Central Statistical Office (Zambia).                                                                                                                                                                                                                                                  | X | 2    | X | 2   |   | All ages | Both |
| Zambia    | 2003                                                 | World Health Organization (WHO). Zambia World Health Survey 2003. Geneva, Switzerland: World Health Organization (WHO), 2005.                                                                                                                                                                                                                                                                    |   |      | X | 52  |   | All ages | Both |
| Zambia    | 2004                                                 | Central Statistical Office (Zambia). Zambia Living Conditions Monitoring Survey 2004-2005. Lusaka, Zambia: Central Statistical Office (Zambia).                                                                                                                                                                                                                                                  | X | 2    | X | 2   |   | All ages | Both |
| Zambia    | 2006                                                 | Central Statistical Office (Zambia). Zambia Living Conditions Monitoring Survey 2006.                                                                                                                                                                                                                                                                                                            | X | 2    |   |     |   | All ages | Both |
| Zambia    | 2008, 2009, 2010, 2011                               | Central Statistical Office (Zambia), Churches Health Association of Zambia (CHAZ), Clinton Health Access Initiative (CHAI), Institute for Health Metrics and Evaluation (IHME), Ministry of Health (Zambia), University of Zambia. Access, Bottlenecks, Costs, and Equity (ABCE) project in Zambia, 2011-2012. Seattle, United States: Institute for Health Metrics and Evaluation (IHME), 2015. |   |      | X |     | X | All ages | Both |
| Zambia    | 2010                                                 | Central Statistical Office (Zambia). Zambia Living Conditions Monitoring Survey 2010.                                                                                                                                                                                                                                                                                                            | X | 2    |   |     |   | All ages | Both |
| Zimbabwe  | 2003                                                 | World Health Organization (WHO). Zimbabwe World Health Survey 2003. Geneva, Switzerland: World Health Organization (WHO), 2005.                                                                                                                                                                                                                                                                  |   |      | X | 52  |   | All ages | Both |
